# Supplementary material for: Insights into the solvent-assisted degradation of organophosphorus compounds by a Zr-based metal–organic framework
Source: Royal Society of Chemistry journal article supplement (doi:10.1039/c9dt03710a), 2019-01-01
Supplement: c9dt03710a1.pdf [file c9dt03710a1.pdf]

**Supporting Information for:**

**Insights into the solvent-assisted degradation of organophosphorus  
compounds by a Zr-based metal-organic framework**

Jacob A. Harvey,<sup>a</sup> Charles J. Pearce,<sup>b</sup> Morgan G. Hall,<sup>c</sup> Eric J. Bruni,<sup>c</sup> Jared B. DeCoste,<sup>c</sup>  
Dorina F. Sava Gallis<sup>b\*</sup>

- a. Geochemistry Department, Sandia National Laboratories, Albuquerque, NM  
87185, USA.
- b. Nanoscale Sciences Department, Sandia National Laboratories, Albuquerque, NM  
87185, USA.
- c. Combat Capabilities Development Command Chemical Biological Center, U.S.  
Army Research, Development and Engineering Command, 8198 Blackhawk Road,  
Aberdeen Proving Ground, MD 21010 USA.

\*E-mail: [dfsava@sandia.gov](mailto:dfsava@sandia.gov)

## Table of Contents

|                                                                          |     |
|--------------------------------------------------------------------------|-----|
| Section S1. Materials and Methods                                        | S3  |
| Section S2. ZrTCPB Synthesis                                             | S3  |
| Section S3. Gas Sorption Measurements                                    | S4  |
| Section S4. Powder X-ray Diffraction Studies                             | S5  |
| Section S5. <sup>31</sup> P Nuclear Magnetic Resonance (NMR) Experiments | S6  |
| Section S6. Computational Details                                        | S7  |
| Section S7. Additional Tables and Figures                                | S8  |
| Section S8. References                                                   | S20 |
| Section S9. Input Files for Calculations                                 | S21 |

## Section S1: Materials and methods

All materials were purchased from commercially available sources and used without further purification.

## Section S2: ZrTCPB Synthesis

### Zr TCPB Synthesis:

The reaction mixture containing  $\text{Cl}_2\text{OZr} \cdot 8 \text{H}_2\text{O}$  (0.0217 g, 0.067 mmol), 1,2,4,5-Tetrakis(4-carboxyphenyl)benzene (TCPB, 0.0067 g, 0.012 mmol), Benzoic acid (BA, 0.604 g, 4.95 mmol), N,N'-dimethylformamide (DMF, 2.15 mL), was placed in a 20 mL scintillation vial and was heated to 115 °C for 72 hrs, at a rate of 1.5 °C/minute and cooled to room temperature at a cooling rate of 1 °C/minute. Solid was then washed in 50 mL of DMF 3 times and then 3 times in 50 mL of MeOH.

### Zr TCPB HCl Washing Method:

50 mg of the white solid precipitate was re-suspended in 20 mL of DMF with 1.5 mL of 8M HCl and was put in the oven for 12 hours at 115 °C. Then the solution was exchanged with 50 mL of acetone. This acetone was replenished several times over the course of 72 hours before sample was re-activated.

### Section S3: Gas Sorption Measurements

Prior to measuring the gas adsorption isotherms, the sample was immersed in 15 mL of methanol for 3 days, with the solvent replenished every 24 hrs. Following this treatment, the sample was activated under vacuum on a Micromeritics ASAP 2020 surface area and porosity analyzer, at 30 °C for 6 hrs and then heated to 150 °C at 1 °C/min for 12 hrs. Nitrogen gas adsorption isotherms were measured at 77 K using nitrogen of ultra-high purity (99.999%, obtained from Matheson Tri-Gas).

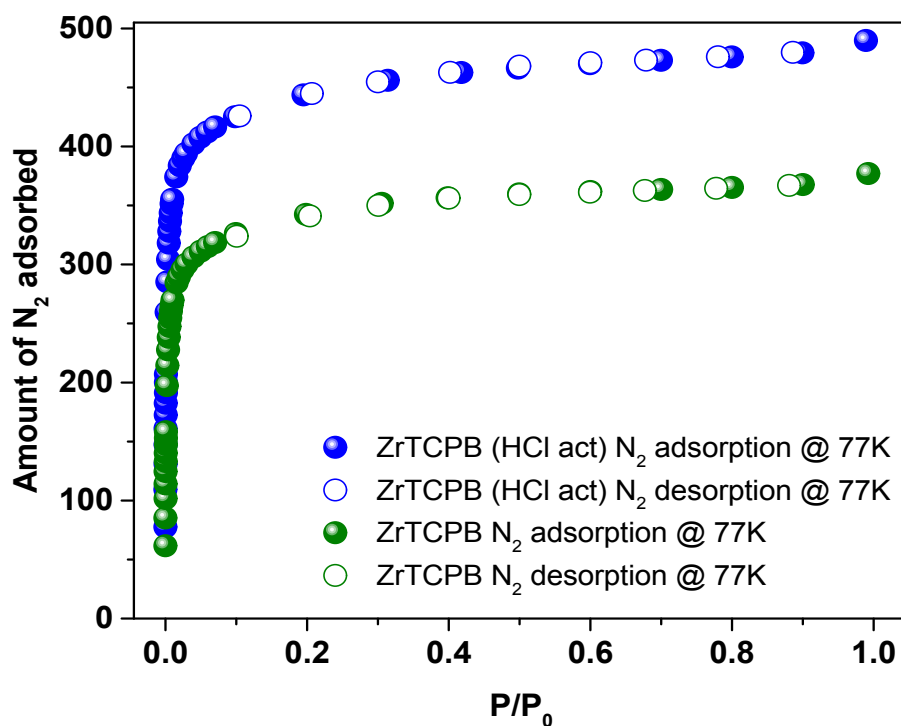

**Figure S1.** Nitrogen sorption isotherm measured at 77K on pristine (green) and HCl washed (blue) ZrTCPB sample.

## Section S4: Powder X-ray Diffraction Studies

Measurements were performed on a Siemens Kristalloflex D500 diffractometer, CuK $\alpha$  radiation ( $\lambda = 1.54178 \text{ \AA}$ ).

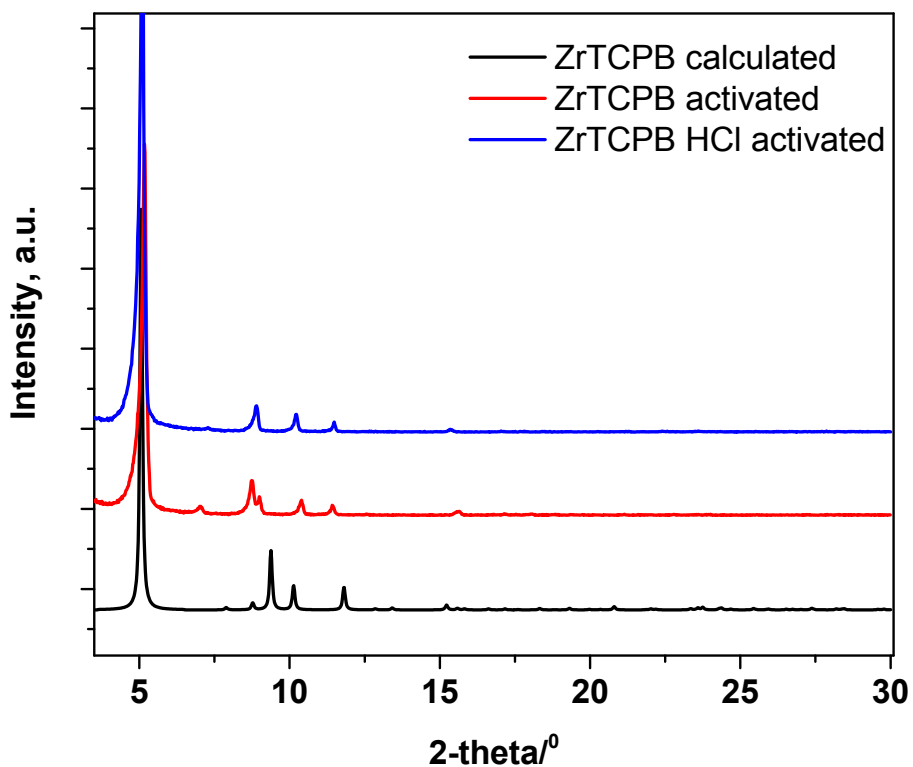

**Figure S2.** X-ray powder diffraction of pristine (red trace) and HCl washed (blue trace) ZrTCPB sample.

| Unit cell          | a ( $\text{\AA}$ ) | b ( $\text{\AA}$ ) | c ( $\text{\AA}$ ) | Volume ( $\text{\AA}^3$ ) |
|--------------------|--------------------|--------------------|--------------------|---------------------------|
| ZrTCPB (this work) | 20.04(3)           | 34.80(3)           | 11.86(2)           | 8271.9                    |
| cif file*          | 20.14              | 34.89              | 11.19              | 7866.8                    |

\* M. Lammert, H. Reinsch, C. A. Murray, M. T. Wharmby, H. Terraschke and N. Stock, *Dalton Trans.*, 2016, **45**, 18822-18826.

## Section S5: <sup>31</sup>P Nuclear Magnetic Resonance (NMR) Experiments

### DMNP simulant

Dimethyl 4-nitrophenyl phosphate (DMNP) was used as received from Sigma-Aldrich with no further purification steps performed.

In a representative in situ NMR experiment, the ZrTCPB sample was added to 1 mL of solvent in an NMR tube. To improve the MOF dispersion into the solvent, the sample was vortexed for 30 s, followed by sonication for 1 min, and then vortexed again for 30 s. 4  $\mu$ L of simulant was added to the mixture, the tube was capped and shaken vigorously twice and then was immediately placed in the instrument, tuned, and the run started.

<sup>31</sup>P NMR experiments were performed on a Bruker Avance III 500 instrument using a 5 mm broadband probe, with a <sup>31</sup>P observed frequency of 202.47 MHz. Experiments were performed in an unlock mode on all reaction mixtures at a stabilized temperature of 50 °C. The <sup>31</sup>P NMR experiments were obtained with standard single pulse Bloch decay with inverse gated <sup>1</sup>H decoupling pulse sequence (Bruker program zgig) using a spectral width of 100 ppm, recycle delay of 30s, and 16 scan averages. Integration was performed in the Bruker Biospin TOPSPIN software suite and used a normalized total <sup>31</sup>P signal for analysis. The <sup>31</sup>P NMR chemical shifts were referenced to the external 85% H<sub>3</sub>PO<sub>4</sub> standard  $\delta = 0.0$  ppm.

Sarin (GB) and GD. ***Caution should be taken on any tests involving GB. The experiments should be run by trained personnel using appropriate safety procedures.***

The GB and GD <sup>31</sup>P NMR experiments were performed on a Varian 400 instrument using a 5 mm broadband probe, with a <sup>31</sup>P observed frequency of 161.85 MHz. Experiments were performed in a lock mode on all reaction mixtures at a stabilized temperature of 50°C. The <sup>31</sup>P NMR experiments were obtained with standard single pulse decay with <sup>1</sup>H decoupling pulse sequence using a spectral width of 100 ppm, recycle delay of 3.75s, and 128 scan averages. The ZrTCPB sample (9.6 mg) was dispersed into a 5 mm NMR tube containing MeOH (1 mL), followed by the addition of GB and GD, respectively (4.5  $\mu$ L). The NMR tube was capped and shaken vigorously before being placed into the NMR magnet for monitoring by <sup>31</sup>P NMR spectroscopy on a Varian INOVA 400 MHz NMR spectrometer. The temperature was maintained by a temperature controlled probe, and the <sup>31</sup>P NMR chemical shifts were referenced to the external standard phosphoric acid  $\delta = 0.0$  ppm. Integration was performed utilizing Varian vnmrj 2.3C software. The <sup>31</sup>P NMR chemical shifts were referenced to the external 85% H<sub>3</sub>PO<sub>4</sub> standard  $\delta = 0.0$  ppm.

## Section S6: Computational Details

The previously published crystal structure of ZrTCPB was used for DFT calculations.<sup>1</sup> An initial optimization of the crystal structure was performed in a three step process. First, the ion positions were optimized with fixed cell dimensions, followed by an optimization of ions and cell parameters, and then ended with an additional ion-only optimization. Initial positions for GB and GD were created by manually placing, with Materials Studio,<sup>2</sup> the molecules near the active site. A single solvent molecule was incorporated, which is initially placed between the OH chelated to a Zr and the  $\mu_3$ -OH. All calculations were performed using the projector augmented wave approach<sup>3</sup> as implemented in the Vienna Ab Initio Simulation Package.<sup>4</sup> The Perdew-Burker-Ernzerhof revised for solids (PBEsol) exchange correlation functional<sup>5</sup> was used on a single  $\Gamma$  point in the Brillouin-zone. Van der Waals corrections were applied using the DFT-D3 method with Becke-Jonson damping.<sup>6</sup> A 400 eV plane wave cutoff energy was used. Optimizations were continued until the force on all atoms was smaller than  $0.03 \text{ eV} \cdot \text{\AA}^{-1}$ . Vibrational calculations were performed on all optimized intermediates and transitions to confirm the existence of 0 (intermediates) or 1 (transition state) imaginary frequency. Transition states were located using the climbing image nudge elastic band method<sup>7</sup>. Initial structures were located along the relevant path via a linear interpolation between initial and final states.

## Section S7: Additional Tables and Figures

| <b>ZrTCPB Ratio Study</b>   |                 |                  |                  |
|-----------------------------|-----------------|------------------|------------------|
| <b>Ratio of MOF to DMNP</b> | <b>MOF (mg)</b> | <b>DMNP (mg)</b> | <b>MeOH (mg)</b> |
| 6.89%                       | 2.9             | 5.6              | 779.2            |
| 7.79%                       | 3.1             | 5.3              | 777.3            |
| 14.79%                      | 5               | 4.5              | 781              |
| 16.82%                      | 7.2             | 5.7              | 777.1            |
| 28.40%                      | 9.6             | 4.5              | 773.1            |

**Table S1.** ZrTCPB to DMNP variable mol ratio study.

| <b>Solvent</b>        | <b>pH</b> |       |
|-----------------------|-----------|-------|
|                       | Initial   | Final |
| <b>H<sub>2</sub>O</b> | 7.0       | 5.0   |
| <b>MeOH</b>           | 6.5       | 6.0   |
| <b>IPA</b>            | 6.5       | 6.5   |
| <b>HFE</b>            | 6.5       | 6.5   |

**Table S2.** Initial and final pH of the solutions before and after MOF-based degradation of DMNP.



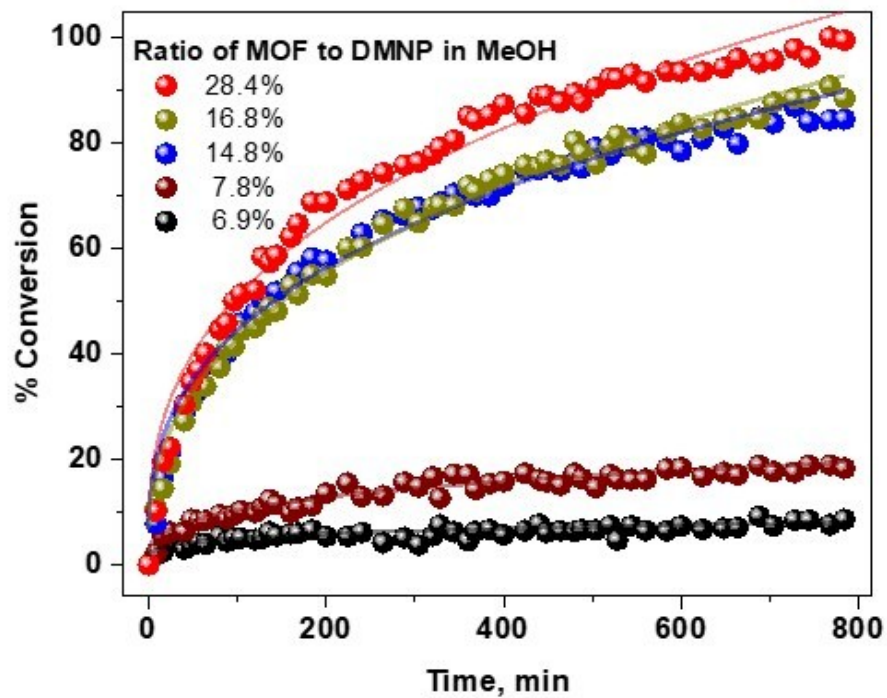

**Figure S3.** ZrTCPB-based degradation of DMNP in methanol as function of variable MOF:DMNP ratios.

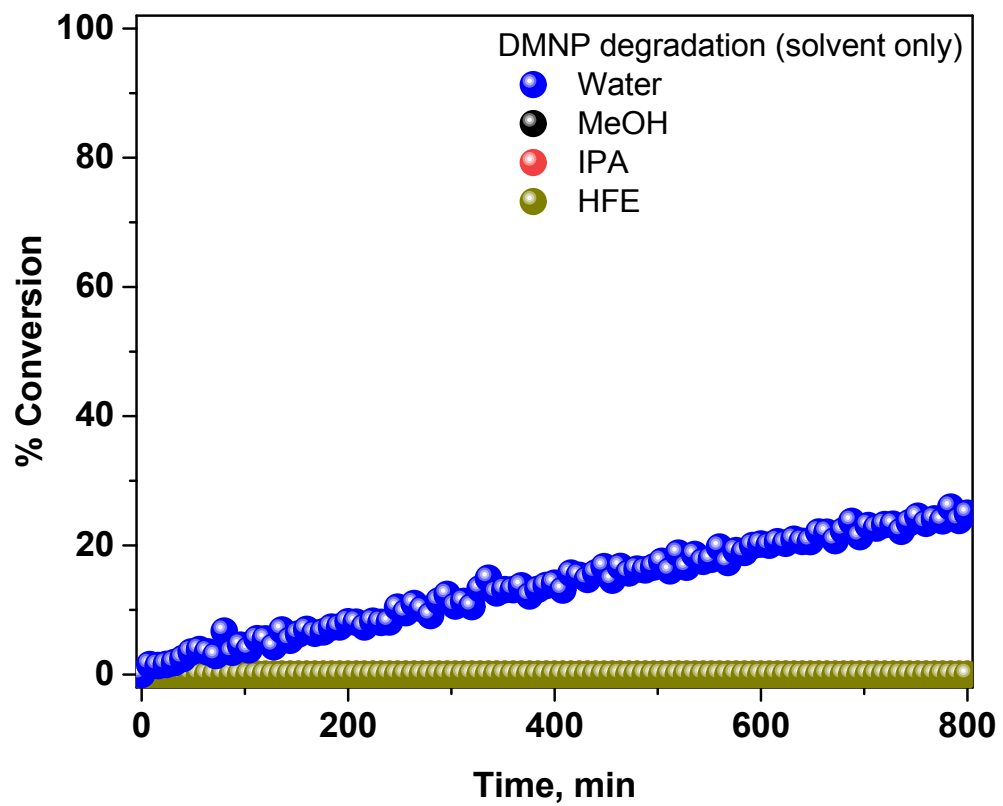

Figure S4. DMNP degradation in water, methanol, isopropyl alcohol and HFE.

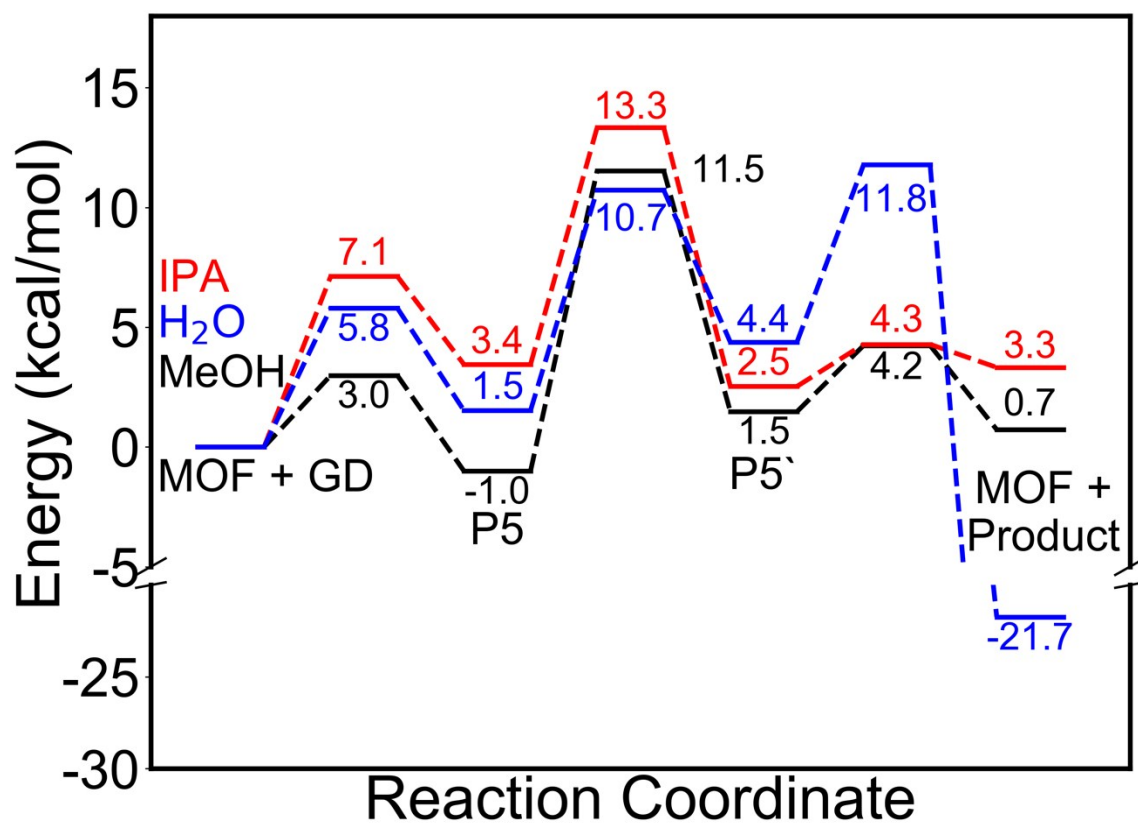

**Figure S5.** Reaction pathway energies for the degradation of GD on ZrTCPB in H<sub>2</sub>O (blue), MeOH (black), and IPA (red). The energies shown for each transition state and intermediate are in kcal·mol<sup>-1</sup> units.

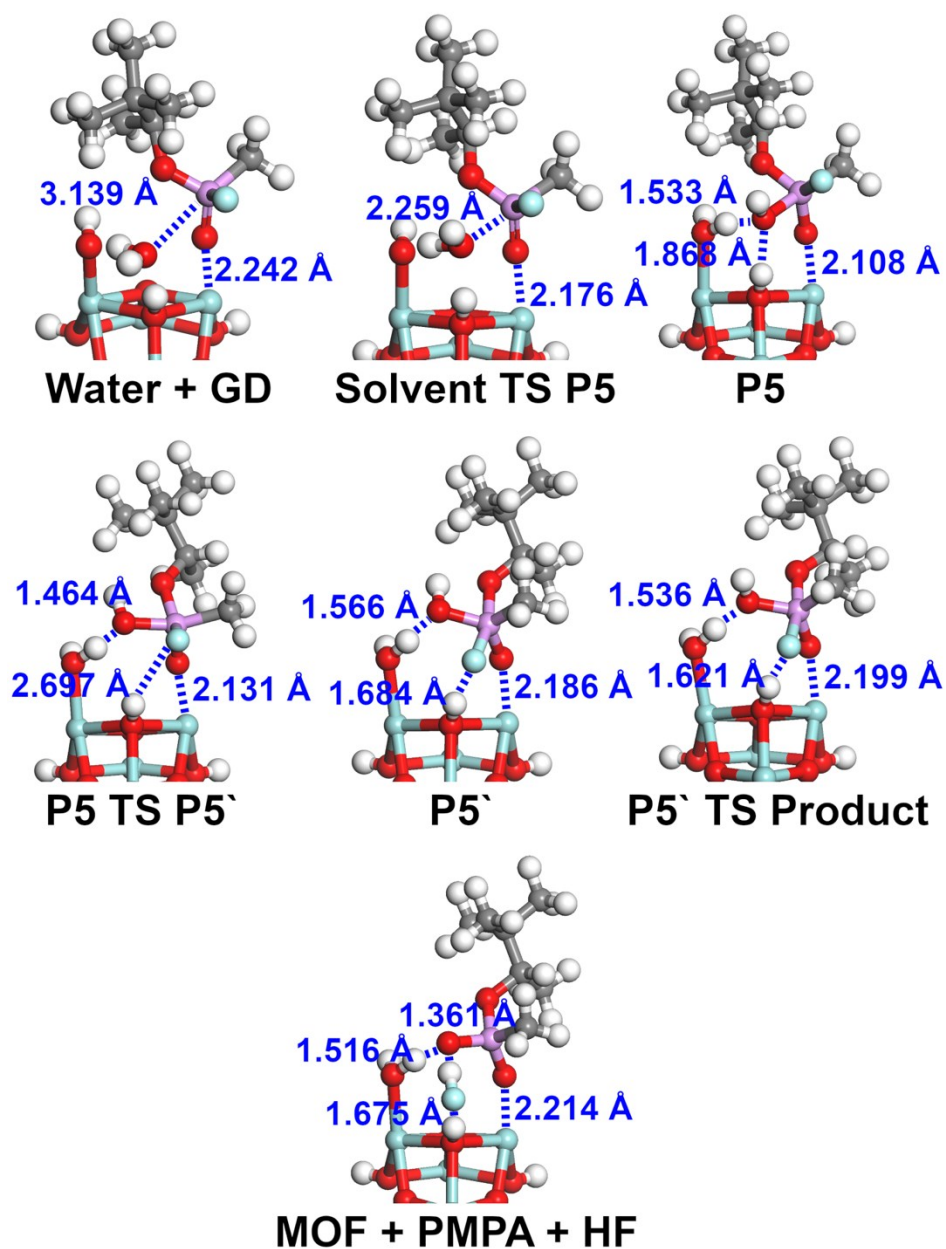

**Figure S6.** Structures of intermediates and transition states in the degradation pathway of GD with H<sub>2</sub>O on ZrTCPB (H = white, O = red, Zr = teal, F = light blue, C = gray). Only the active site is depicted for visual clarity. Relevant distances are shown.

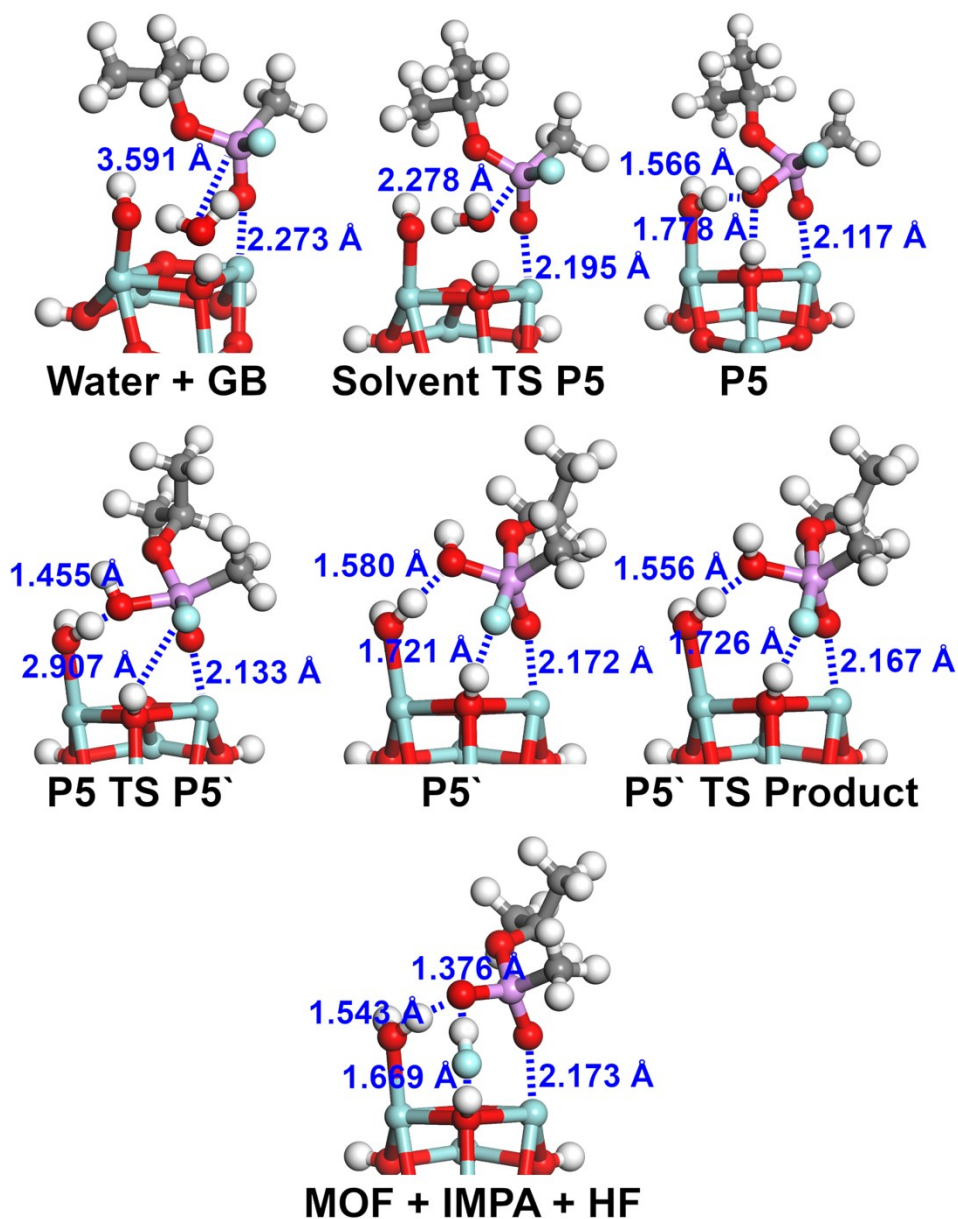

**Figure S7.** Structures of intermediates and transition states in the degradation pathway of GB with H<sub>2</sub>O on ZrTCPB (H = white, O = red, Zr = teal, F = light blue, C = gray). Only the active site is depicted for visual clarity. Relevant distances are shown.

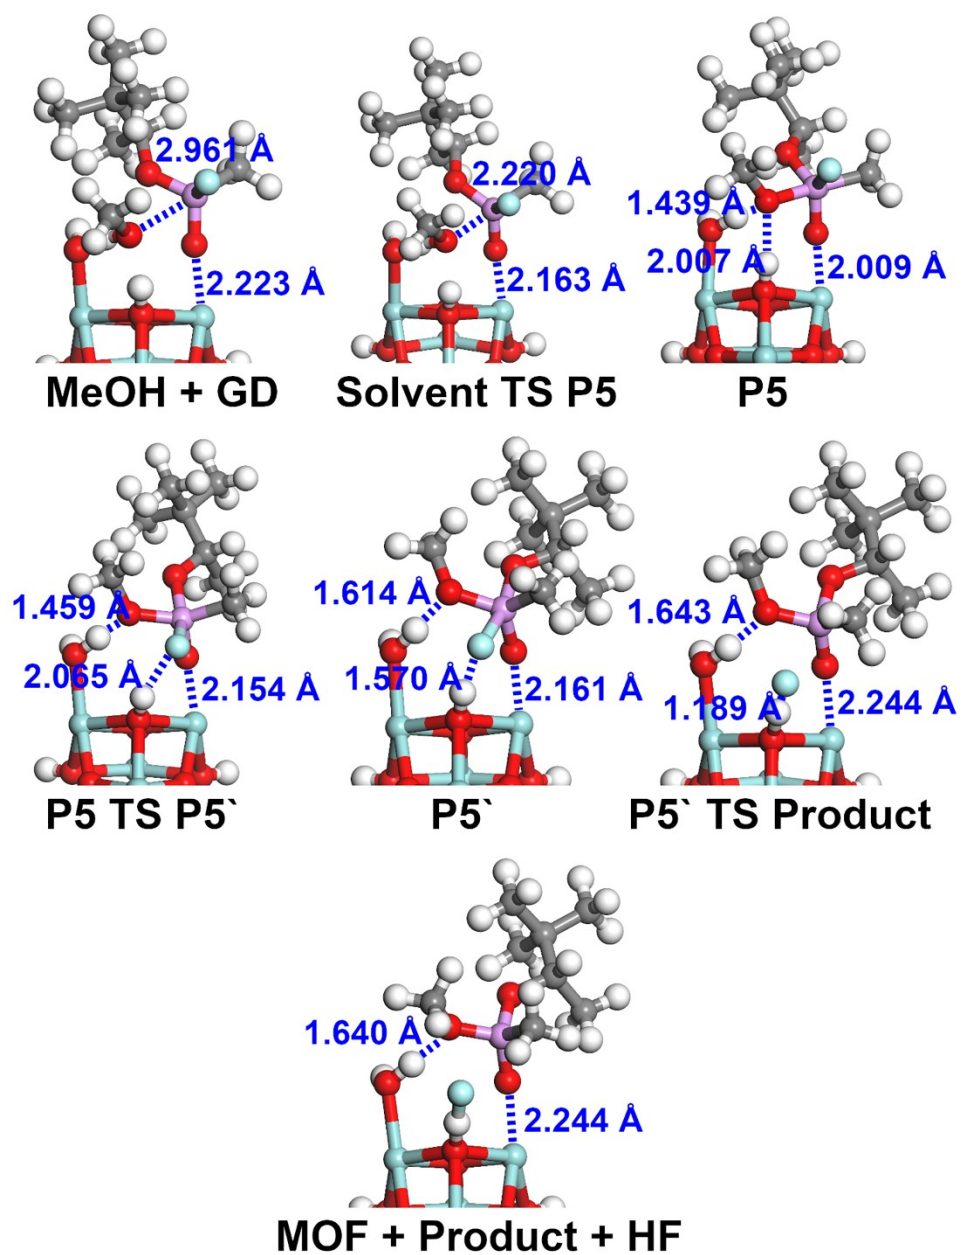

**Figure S8.** Structures of intermediates and transition states in the degradation pathway of GD with MeOH on ZrTCPB (H = white, O = red, Zr = teal, F = light blue, C = gray). Only the active site is depicted for visual clarity. Relevant distances are shown.

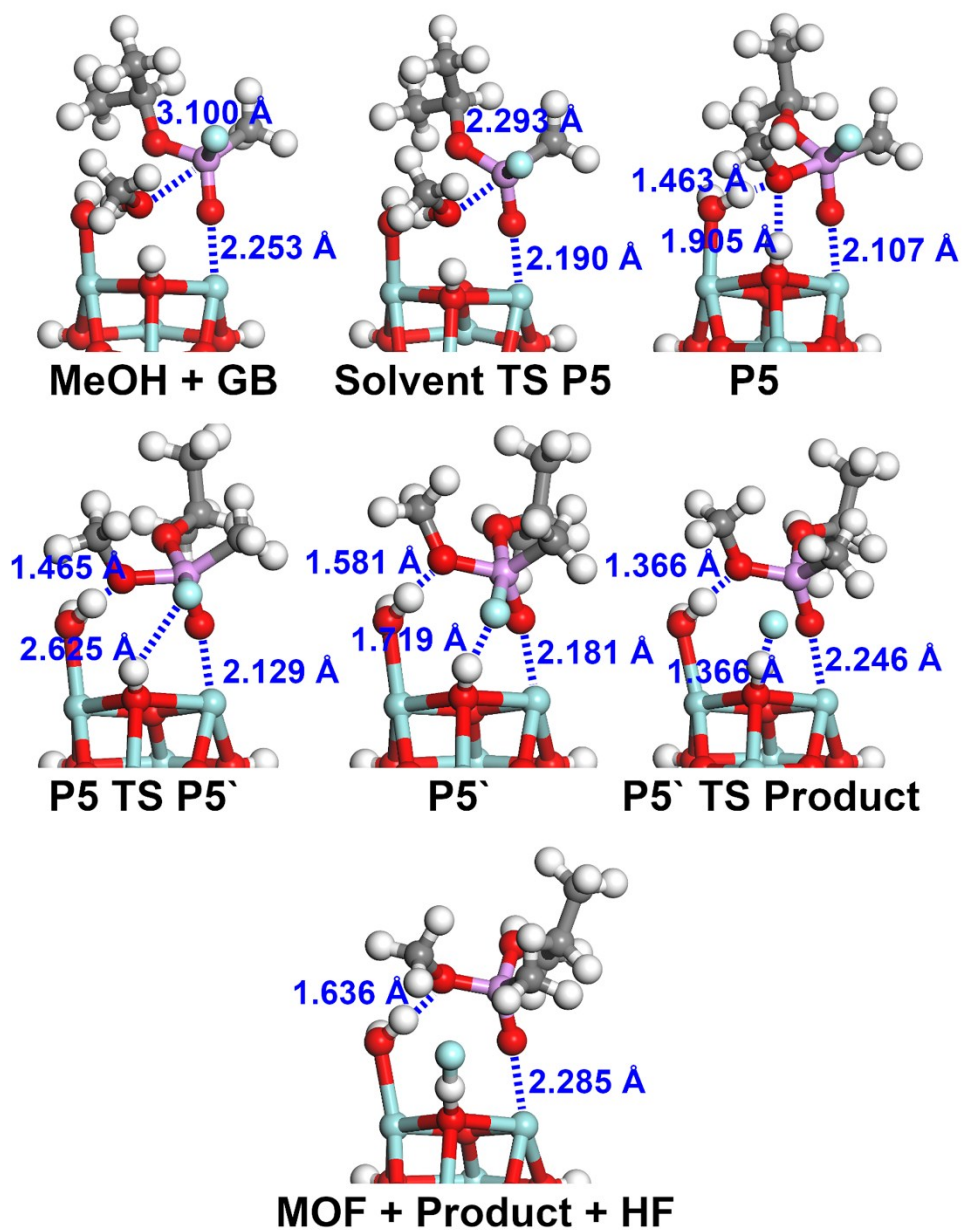

**Figure S9.** Structures of intermediates and transition states in the degradation pathway of GB with MeOH on ZrTCPB (H = white, O = red, Zr = teal, F = light blue, C = gray). Only the active site is depicted for visual clarity. Relevant distances are shown.

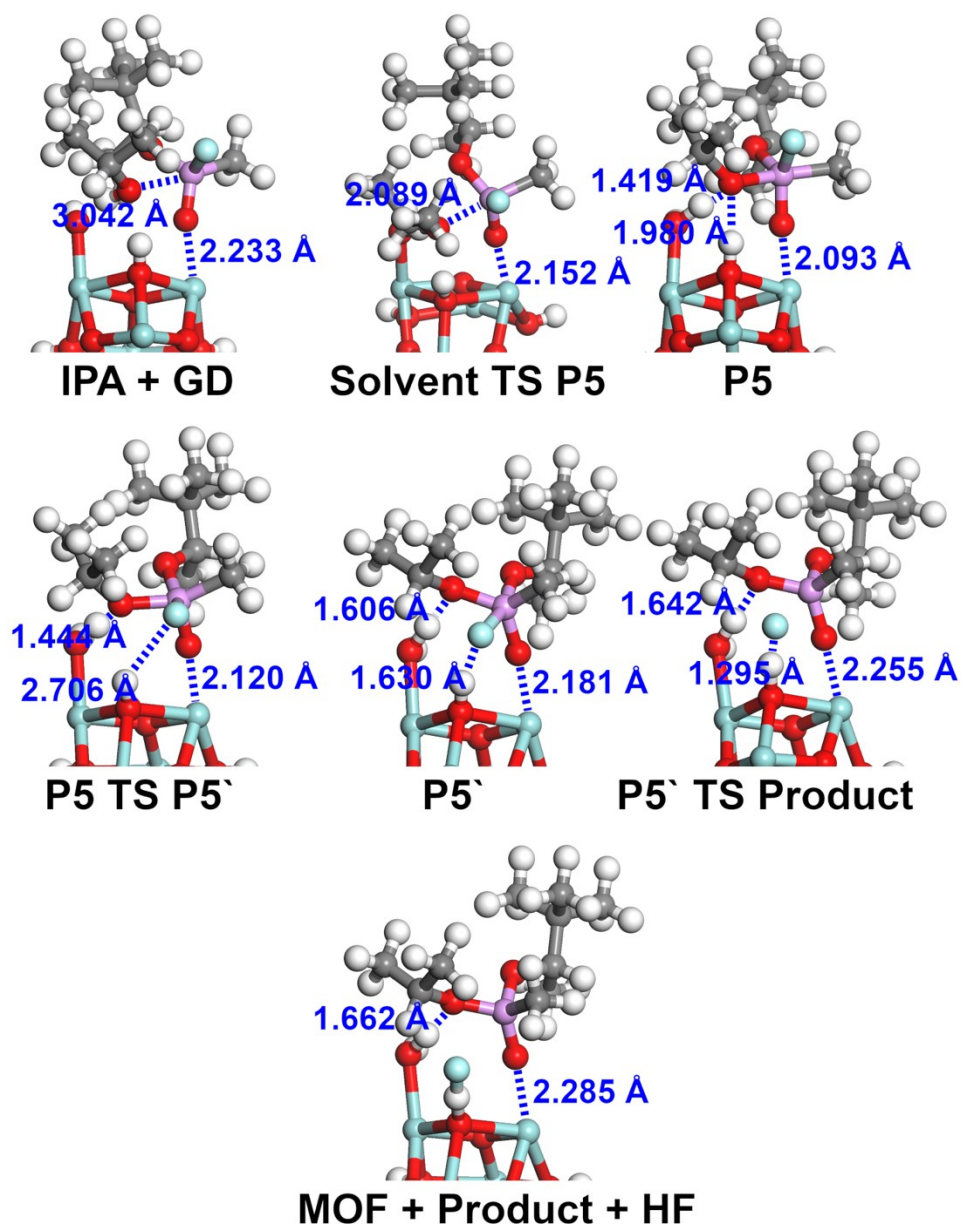

**Figure S10.** Structures of intermediates and transition states in the degradation pathway of GD with IPA on ZrTCPB (H = white, O = red, Zr = teal, F = light blue, C = gray). Only the active site is depicted for visual clarity. Relevant distances are shown.



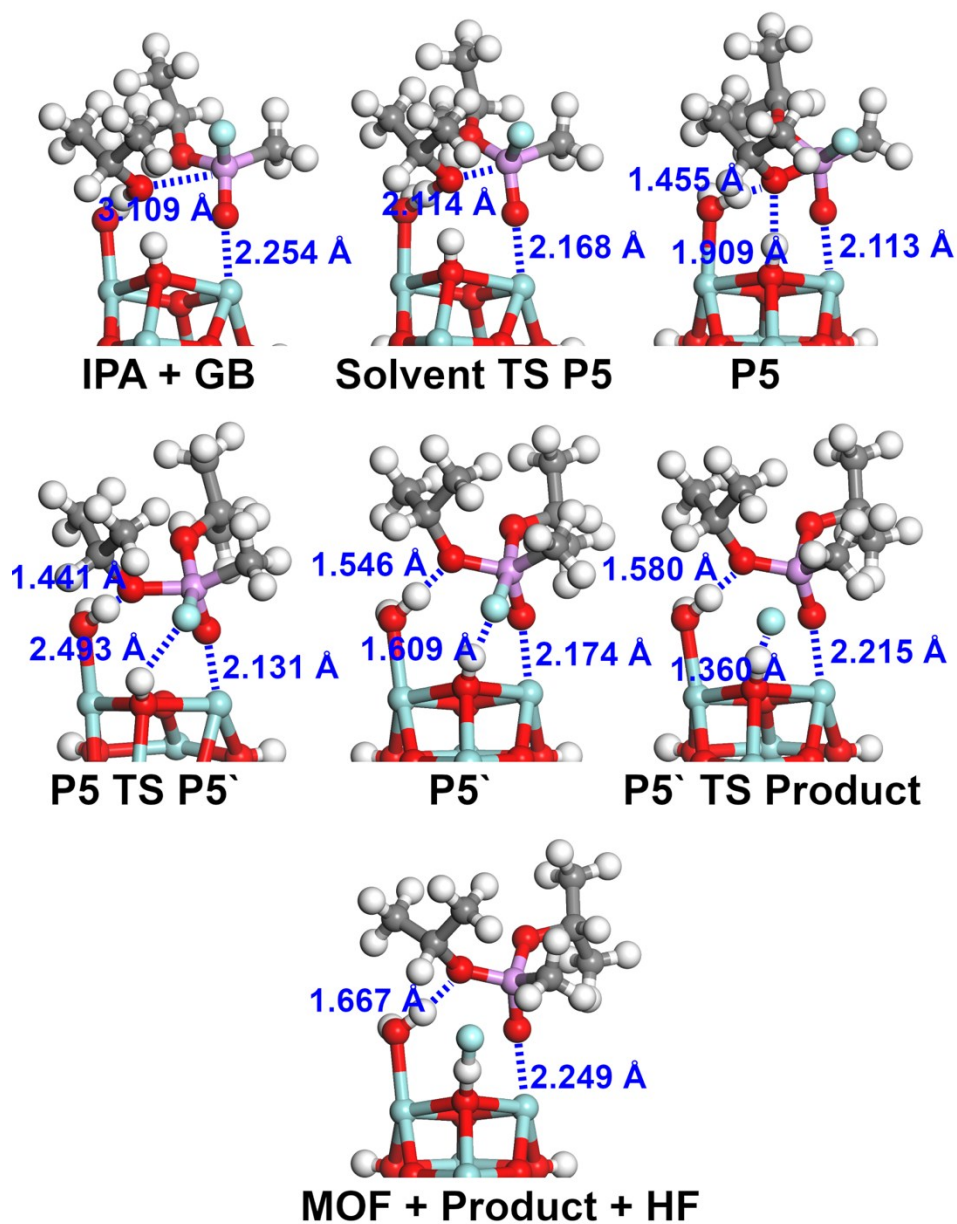

**Figure S11.** Structures of intermediates and transition states in the degradation pathway of GB with IPA on ZrTCPB (H = white, O = red, Zr = teal, F = light blue, C = gray).

Only the active site is depicted for visual clarity. Relevant distances are shown.

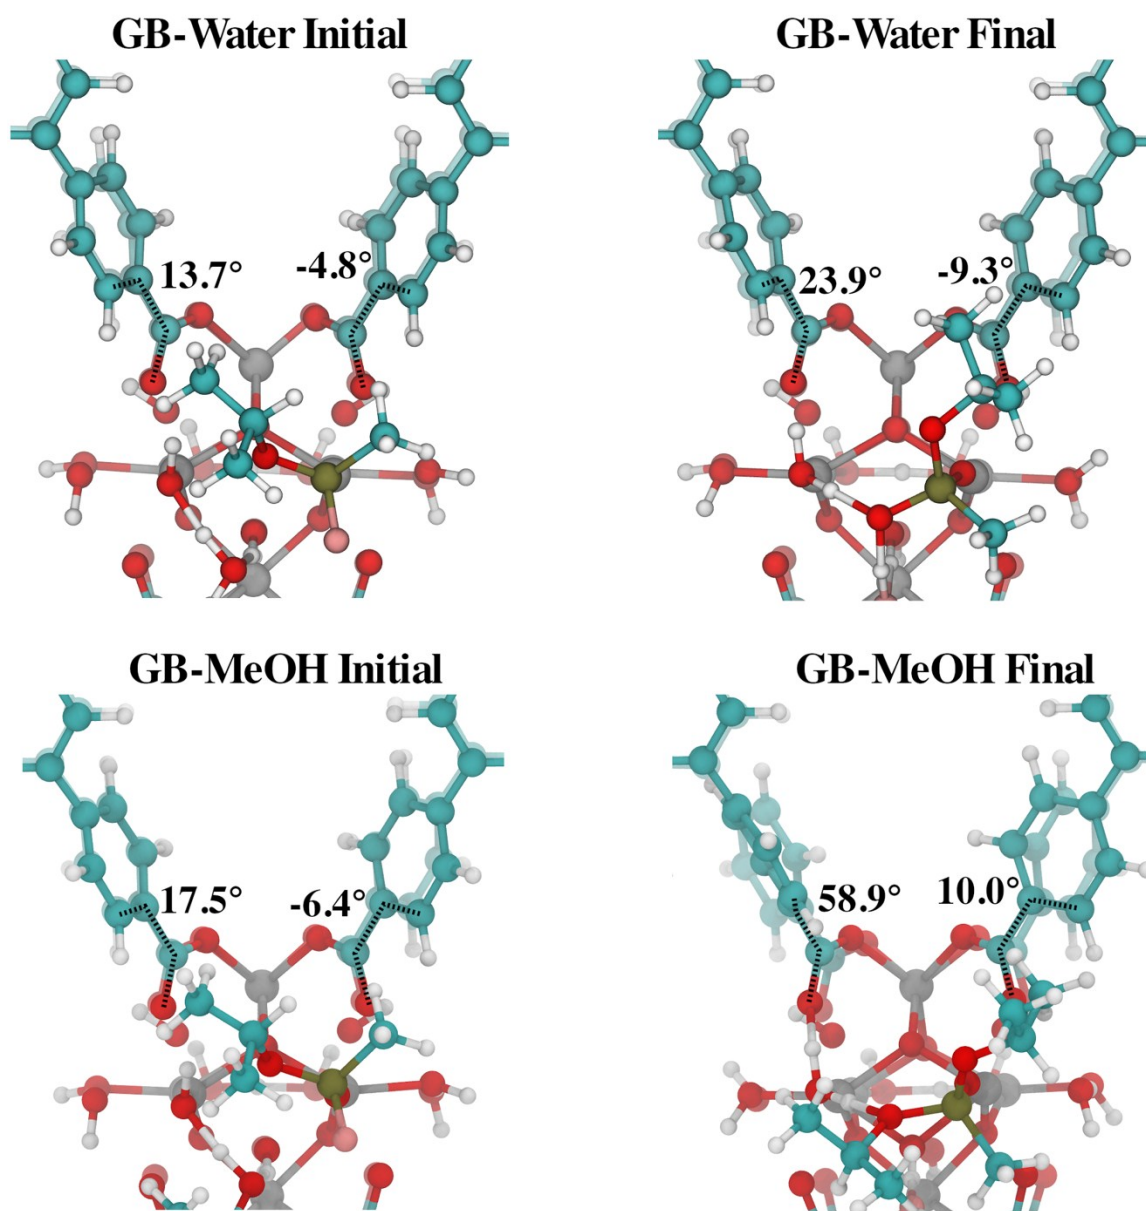

**Figure S12.** Structures of the initial (left) and final (right) states of GB degradation in H<sub>2</sub>O (top) and MeOH (bottom). The dihedral angle of two relevant linkers near the active site is indicated. The angle changes more drastically from initial to final for the larger MeOH solvent.

| Solvent          | GB | GD |
|------------------|----|----|
| H <sub>2</sub> O | 10 | 14 |
| MeOH             | 24 | 25 |
| IPA              | 33 | 20 |

**Table S3.** Change in the dihedral angle (°) of the linker depicted in Fig. S12 from initial to final state for GB and GD in H<sub>2</sub>O, MeOH, and IPA.

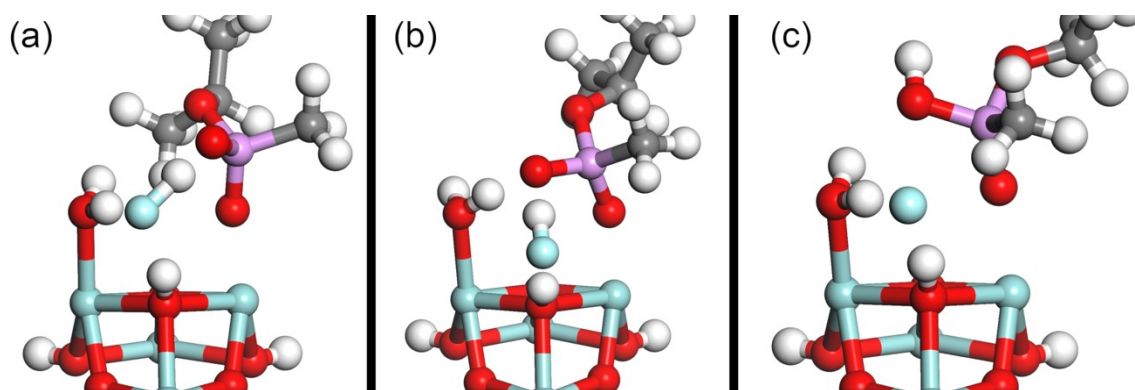

**Figure S13.** Stable structures of GB degraded on ZrTCPB by H<sub>2</sub>O. The relative energies of each are (a) 0.0, (b) 4.9, and (c) 28.4 kcal · mol<sup>-1</sup>. Only the degraded structure depicted in (c) remains protonated.

## Section S8: References

1. M. Lammert, H. Reinsch, C. A. Murray, M. T. Wharmby, H. Terraschke and N. Stock, *Dalton Trans.*, 2016, **45**, 18822-18826.
2. Dassault Systèmes BIOVIA, Materials Studio, 2017 R2 (17.2.0.1626), San Diego: Dassault Systèmes, 2017
3. (a) P. E. Blöchl, *Phys. Rev. B*, 1994, **50**, 17953-17979; (b) G. Kresse and D. Joubert, *Phys. Rev. B*, 1999, **59**, 1758-1775.
4. (a) G. Kresse and J. Furthmuller, *Comp. Mater. Sci.*, 1996, **6**, 15-50; (b) G. Kresse and J. Furthmuller, *Phys. Rev. B*, 1996, **54**, 11169-11186; (c) G. Kresse and J. Hafner, *Phys. Rev. B*, 1994, **49**, 14251-14269; (d) G. Kresse and J. Hafner, *Phys. Rev. B*, 1993, **47**, 558-561.
5. J. P. Perdew, A. Ruzsinszky, G. I. Csonka, O. A. Vydrov, G. E. Scuseria, L. A. Constantin, X. Zhou and K. Burke, *Phys. Rev. Lett.*, 2008, **100**, 136406.
6. (a) S. Grimme, S. Ehrlich and L. Goerigk, *J. Comput. Chem.*, 2011, **32**, 1456-1465; (b) S. Grimme, J. Antony, S. Ehrlich and H. Krieg, *J. Chem. Phys.*, 2010, **132**, 154104.
7. (a) G. Henkelman and H. Jónsson, *J. Chem. Phys.*, 2000, **113**, 9978-9985; (b) G. Henkelman, B. P. Uberuaga and H. Jónsson, *J. Chem. Phys.*, 2000, **113**, 9901-9904.

## Section S9: Input Files for Calculations

### Representative INCAR files

#### Optimization of reactants, products, and intermediates

```
SYSTEM = gb_solvent_zrtcpb

ISTART = 0 ! 0 = new; 1 = restart
ICHARG = 0 ! 0 = charge density from wave functions; 1 = read from CHGCAR file

ISIF = 2 ! 2 = relax ions; 3 = relax ions and cell boundaries; set ENCUT = 1.3*ENMAX for ISIF=3
ISYM = 0

ENCUT = 400 ! must set ENCUT = 1.3*ENMAX for ISIF = 2

IVDW = 12 ! DFT-D3 method with BJ damping
GGA=PS ! Perdew-Burke-Ernzerhof revised for solids

ISMEAR = 1 ! confirm 'entropy T*S' in OUTCAR is less than 1 meV/atom; if not, adjust SIGMA or ISMEAR
SIGMA = 0.2 ! change sigma if 'entropy T*S' in OUTCAR is less than 1 meV/atom

MAXMIX = 40 ! should be approx 3*(number of electronic steps in first iteration)

EDIFFG = -0.03 ! remove if change in total energy between two ionic steps is greater than 0.001

LREAL = AUTO ! use LREAL=FALSE for final accurate energies

ISPIN = 1 ! 1 for non-spin-polarized; 2 for spin-polarized

NELM = 80 ! number of electronic self-consistent loops in each step
NSW = 1000 ! number of steps; default is 0

IBRION = 2 ! 2 good for systems that are hard to converge
POTIM = 0.2 ! optimal POTIM = original POTIM * trialstep number from OUTCAR

NCORE = 16 ! recommended for linux clusters
LPLANE = .TRUE. ! recommended for linux clusters
LSCALU = .FALSE. ! recommended for linux clusters
NSIM = 4 ! recommended for linux clusters
```

#### Optimization of transition states (CI-NEB)

```
SYSTEM = gb_solvent_ts_p5_zrtcpb

ISTART = 0 ! 0 = new; 1 = restart
ICHARG = 0 ! 0 = charge density from wave functions; 1 = read from CHGCAR file

IMAGES = 8 ! number of NEB images
SPRING = -5.0 ! spring < 0 for NEB, -5 = recommended
ICHAIN = 0
LCLIMB = .TRUE.

ISYM = 0
ISIF = 2 ! 2 = relax ions; 3 = relax ions and cell boundaries; set ENCUT = 1.3*ENMAX for ISIF=3

ENCUT = 400 ! must set ENCUT = 1.3*ENMAX for ISIF = 2

IVDW = 12 ! DFT-D3 method with BJ damping
GGA=PS ! Perdew-Burke-Ernzerhof revised for solids

ISMEAR = 1 ! confirm 'entropy T*S' in OUTCAR is less than 1 meV/atom; if not, adjust SIGMA or ISMEAR
SIGMA = 0.2 ! change sigma if 'entropy T*S' in OUTCAR is less than 1 meV/atom

MAXMIX = 40 ! should be approx 3*(number of electronic steps in first iteration)

EDIFFG = -0.03 ! remove if change in total energy between two ionic steps is greater than 0.001

LREAL = AUTO ! use LREAL=FALSE for final accurate energies

ISPIN = 1 ! 1 for non-spin-polarized; 2 for spin-polarized

NELM = 80 ! number of electronic self-consistent loops in each step
NSW = 1000 ! number of steps; default is 0

IBRION = 1 ! 1 recommended for NEB
POTIM = 0.1 ! optimal POTIM = original POTIM * trialstep number from OUTCAR

NCORE = 16 ! recommended for linux clusters
LPLANE = .TRUE. ! recommended for linux clusters
LSCALU = .FALSE. ! recommended for linux clusters
```

NSIM = 4 ! recommended for linux clusters

## POSCAR files for h<sub>2</sub>O solvent

## POSCAR file for gb\_solvent

POSCAR file from zrtcpb-gb-h2o-c.res: C: 140 F: 1 H: 114 O: 66 P: 1 ZR: 12  
34.89200000000000

0.5792995890490465 -0.0000450140396845 0.0007649282407427  
-0.0000781726227076 1.0082675674799713 0.0000166934211398  
0.0004256087542374 0.0000053656439079 0.3214078049098053

140 1 114 66 1 12

Direct

0.79023 0.88207 0.30393  
0.23310 0.21668 0.56282  
0.73274 0.71652 0.43658  
0.70744 0.68401 0.36688  
0.64843 0.68909 0.30333  
0.61972 0.65899 0.24289  
0.85218 0.81132 0.30654  
0.73821 0.64833 0.36384  
0.61426 0.59095 0.18651  
0.64889 0.62299 0.24586  
0.70878 0.61791 0.30542  
0.88141 0.84152 0.24703  
0.20723 0.18404 0.63189  
0.23333 0.78352 0.56310  
0.20768 0.81611 0.63258  
0.14734 0.81133 0.69266  
0.11810 0.84151 0.75223  
0.23920 0.85152 0.63824  
0.11299 0.90939 0.80970  
0.14801 0.87731 0.75118  
0.20926 0.88210 0.69541  
0.76032 0.85148 0.36115  
0.73406 0.28376 0.56356  
0.14644 0.18870 0.69039  
0.70706 0.31636 0.63162  
0.64542 0.31144 0.68693  
0.61409 0.34168 0.74261  
0.88657 0.90941 0.18987  
0.73765 0.35199 0.63765  
0.60723 0.40976 0.79857  
0.64306 0.37773 0.74138  
0.70544 0.38269 0.69015  
0.85151 0.87731 0.24822  
0.77032 0.21742 0.56295  
0.11678 0.15842 0.74883  
0.79758 0.18507 0.63030  
0.85805 0.19018 0.68918  
0.88899 0.15982 0.74442  
0.76743 0.14920 0.63316  
0.89552 0.09146 0.79720  
0.86040 0.12367 0.74037  
0.79895 0.11854 0.68626  
0.23871 0.14865 0.63728  
0.11203 0.09045 0.80654  
0.14659 0.12261 0.74747  
0.20811 0.11795 0.69265  
0.73325 0.71640 0.56275  
0.70803 0.68386 0.63287  
0.26725 0.71658 0.56322  
0.64846 0.68875 0.69534  
0.61971 0.65861 0.75586  
0.73945 0.64842 0.63740  
0.61423 0.59063 0.81187  
0.64936 0.62273 0.75363  
0.70995 0.61791 0.69561  
0.76700 0.78333 0.56257  
0.79259 0.81569 0.63248  
0.85114 0.81022 0.69713  
0.88032 0.84017 0.75765  
0.29257 0.68415 0.63323  
0.76254 0.85157 0.63485  
0.88700 0.90840 0.81225  
0.82264 0.53180 0.69660  
0.85191 0.87636 0.75388  
0.89930 0.51162 1.09541  
0.85735 0.54778 1.07897  
0.81141 0.55166 1.18796  
0.79228 0.88178 0.69372  
0.26917 0.28300 0.56212  
0.29653 0.31519 0.62980  
0.35632 0.30969 0.69058

|         |         |         |
|---------|---------|---------|
| 0.38707 | 0.33983 | 0.74723 |
| 0.26684 | 0.35119 | 0.63174 |
| 0.39366 | 0.40810 | 0.80099 |
| 0.35135 | 0.68938 | 0.69738 |
| 0.35886 | 0.37608 | 0.74273 |
| 0.26581 | 0.28375 | 0.43617 |
| 0.29811 | 0.38161 | 0.68649 |
| 0.76685 | 0.21667 | 0.43701 |
| 0.79265 | 0.18401 | 0.36792 |
| 0.85326 | 0.18868 | 0.30882 |
| 0.29271 | 0.31635 | 0.36795 |
| 0.88285 | 0.15838 | 0.25040 |
| 0.76125 | 0.14858 | 0.36304 |
| 0.88766 | 0.09037 | 0.19317 |
| 0.38010 | 0.65938 | 0.75820 |
| 0.85314 | 0.12254 | 0.25229 |
| 0.79176 | 0.11787 | 0.30764 |
| 0.35432 | 0.31143 | 0.31255 |
| 0.26672 | 0.71642 | 0.43704 |
| 0.29196 | 0.68387 | 0.36703 |
| 0.35159 | 0.68871 | 0.30472 |
| 0.38032 | 0.65855 | 0.24435 |
| 0.26045 | 0.64844 | 0.36242 |
| 0.38583 | 0.59059 | 0.18854 |
| 0.35061 | 0.62269 | 0.24657 |
| 0.26202 | 0.64840 | 0.63622 |
| 0.28994 | 0.61790 | 0.30437 |
| 0.38558 | 0.34167 | 0.25667 |
| 0.23276 | 0.78331 | 0.43693 |
| 0.20716 | 0.81567 | 0.36700 |
| 0.14856 | 0.81020 | 0.30246 |
| 0.11932 | 0.84014 | 0.24206 |
| 0.23719 | 0.85156 | 0.36465 |
| 0.26209 | 0.35197 | 0.36189 |
| 0.11275 | 0.90837 | 0.18732 |
| 0.14776 | 0.87634 | 0.24579 |
| 0.38594 | 0.59128 | 0.81437 |
| 0.20739 | 0.88176 | 0.30588 |
| 0.39244 | 0.40973 | 0.20079 |
| 0.73078 | 0.28298 | 0.43761 |
| 0.70338 | 0.31514 | 0.36988 |
| 0.64358 | 0.30960 | 0.30913 |
| 0.61282 | 0.33972 | 0.25238 |
| 0.73308 | 0.35114 | 0.36775 |
| 0.60619 | 0.40795 | 0.19841 |
| 0.64102 | 0.37597 | 0.25673 |
| 0.70180 | 0.38153 | 0.31287 |
| 0.35122 | 0.62330 | 0.75506 |
| 0.35660 | 0.37770 | 0.25792 |
| 0.29425 | 0.38266 | 0.30925 |
| 0.74703 | 0.24946 | 0.37739 |
| 0.24952 | 0.74978 | 0.37737 |
| 0.25291 | 0.24949 | 0.62240 |
| 0.75035 | 0.74980 | 0.62226 |
| 0.25060 | 0.75016 | 0.62274 |
| 0.75402 | 0.25097 | 0.62317 |
| 0.74918 | 0.75009 | 0.37689 |
| 0.24591 | 0.25093 | 0.37661 |
| 0.29148 | 0.61809 | 0.69506 |
| 0.76635 | 0.78350 | 0.43640 |
| 0.22965 | 0.21739 | 0.43689 |
| 0.20237 | 0.18501 | 0.36965 |
| 0.14198 | 0.19018 | 0.31054 |
| 0.11095 | 0.15984 | 0.25531 |
| 0.23236 | 0.14910 | 0.36700 |
| 0.10427 | 0.09146 | 0.20260 |
| 0.13940 | 0.12365 | 0.25951 |
| 0.20075 | 0.11846 | 0.31392 |
| 0.79190 | 0.81610 | 0.36682 |
| 0.83520 | 0.46561 | 0.86657 |
| 0.78723 | 0.35578 | 0.60004 |
| 0.56611 | 0.33818 | 0.78664 |
| 0.62169 | 0.28345 | 0.68325 |
| 0.73172 | 0.58972 | 0.30603 |
| 0.23290 | 0.91011 | 0.69788 |
| 0.28799 | 0.85505 | 0.59726 |
| 0.07090 | 0.83826 | 0.79914 |
| 0.12274 | 0.78358 | 0.68948 |
| 0.78596 | 0.64449 | 0.40780 |
| 0.27615 | 0.41006 | 0.68694 |
| 0.21851 | 0.35509 | 0.58995 |
| 0.43397 | 0.33623 | 0.79443 |
| 0.57338 | 0.66237 | 0.19380 |
| 0.37930 | 0.28147 | 0.68941 |
| 0.74491 | 0.24918 | 0.27971 |
| 0.62435 | 0.71700 | 0.30477 |
| 0.76994 | 0.91013 | 0.69279 |
| 0.71515 | 0.85574 | 0.58990 |



|         |         |         |
|---------|---------|---------|
| 0.92638 | 0.83644 | 0.80733 |
| 0.87462 | 0.78214 | 0.69626 |
| 0.24942 | 0.74974 | 0.27960 |
| 0.73341 | 0.58986 | 0.69578 |
| 0.78766 | 0.64477 | 0.59442 |
| 0.57297 | 0.66189 | 0.80420 |
| 0.62397 | 0.71652 | 0.69302 |
| 0.23149 | 0.08987 | 0.69368 |
| 0.28769 | 0.14517 | 0.59696 |
| 0.06939 | 0.16160 | 0.79511 |
| 0.12196 | 0.21648 | 0.68721 |
| 0.72372 | 0.40999 | 0.31232 |
| 0.78144 | 0.35508 | 0.40945 |
| 0.56590 | 0.33608 | 0.20525 |
| 0.62065 | 0.28136 | 0.31041 |
| 0.22971 | 0.91012 | 0.30681 |
| 0.28461 | 0.85573 | 0.40952 |
| 0.07322 | 0.83642 | 0.19249 |
| 0.12509 | 0.78212 | 0.30339 |
| 0.26641 | 0.58986 | 0.30406 |
| 0.21217 | 0.64481 | 0.40519 |
| 0.42710 | 0.66178 | 0.19610 |
| 0.37612 | 0.71648 | 0.30694 |
| 0.75050 | 0.74979 | 0.72004 |
| 0.76843 | 0.08977 | 0.30699 |
| 0.71239 | 0.14507 | 0.40375 |
| 0.93009 | 0.16159 | 0.20365 |
| 0.87762 | 0.21650 | 0.31148 |
| 0.25505 | 0.24921 | 0.72007 |
| 0.22309 | 0.09011 | 0.31330 |
| 0.28119 | 0.14539 | 0.40713 |
| 0.06361 | 0.16331 | 0.20948 |
| 0.11876 | 0.21833 | 0.31199 |
| 0.71198 | 0.52243 | 0.14130 |
| 0.57695 | 0.50072 | 0.57183 |
| 0.28785 | 0.52246 | 0.85821 |
| 0.42273 | 0.50092 | 0.42801 |
| 0.49912 | 0.49963 | 0.35815 |
| 0.57988 | 0.47200 | 0.36875 |
| 0.50083 | 0.49998 | 0.64177 |
| 0.41950 | 0.47251 | 0.63077 |
| 0.36036 | 0.44491 | 0.00088 |
| 0.49917 | 0.55409 | 0.25331 |
| 0.50082 | 0.55432 | 0.74713 |
| 0.63943 | 0.44482 | 0.99861 |
| 0.30399 | 0.50070 | 0.00502 |
| 0.29152 | 0.52506 | 0.13751 |
| 0.07884 | 0.02413 | 0.38184 |
| 0.21744 | 0.02136 | 0.86541 |
| 0.19628 | 0.99895 | 0.00977 |
| 0.99307 | 0.00188 | 0.35629 |
| 0.78220 | 0.02124 | 0.13407 |
| 0.80341 | 0.99892 | 0.98954 |
| 0.92117 | 0.02421 | 0.61778 |
| 0.00677 | 0.00191 | 0.64336 |
| 0.13745 | 0.05516 | 0.00783 |
| 0.86230 | 0.05512 | 0.99173 |
| 0.99909 | 0.94455 | 0.25013 |
| 0.00059 | 0.94455 | 0.74942 |
| 0.20825 | 0.97508 | 0.14262 |
| 0.91977 | 0.98882 | 0.41612 |
| 0.79170 | 0.97495 | 0.85686 |
| 0.08011 | 0.98879 | 0.58363 |
| 0.27144 | 0.41090 | 0.30691 |
| 0.21253 | 0.35573 | 0.39962 |
| 0.43353 | 0.33820 | 0.21252 |
| 0.37811 | 0.28346 | 0.31630 |
| 0.75604 | 0.25124 | 0.72085 |
| 0.76654 | 0.91005 | 0.30136 |
| 0.71151 | 0.85499 | 0.40208 |
| 0.92857 | 0.83828 | 0.20002 |
| 0.87676 | 0.78358 | 0.30971 |
| 0.25068 | 0.75022 | 0.72051 |
| 0.26871 | 0.58984 | 0.69443 |
| 0.21445 | 0.64443 | 0.59169 |
| 0.42622 | 0.66292 | 0.80782 |
| 0.37526 | 0.71734 | 0.69611 |
| 0.74899 | 0.75014 | 0.27911 |
| 0.77648 | 0.09021 | 0.68689 |
| 0.71854 | 0.14558 | 0.59325 |
| 0.93637 | 0.16324 | 0.79019 |
| 0.88138 | 0.21830 | 0.68759 |
| 0.24395 | 0.25120 | 0.27893 |
| 0.72820 | 0.41094 | 0.69250 |
| 0.80989 | 0.51106 | 0.62194 |
| 0.79618 | 0.55995 | 0.68027 |
| 0.87835 | 0.53676 | 0.69783 |
| 0.93367 | 0.50793 | 1.01567 |

|         |         |         |
|---------|---------|---------|
| 0.86509 | 0.48599 | 1.10254 |
| 0.92983 | 0.51420 | 1.18045 |
| 0.89093 | 0.57367 | 1.07149 |
| 0.84249 | 0.55318 | 1.27244 |
| 0.77750 | 0.52585 | 1.19244 |
| 0.78047 | 0.57858 | 1.17972 |
| 0.71508 | 0.46859 | 1.06524 |
| 0.73730 | 0.41773 | 1.01342 |
| 0.43564 | 0.40003 | 0.12380 |
| 0.93784 | 0.10069 | 0.87574 |
| 0.36825 | 0.55739 | 0.79042 |
| 0.56731 | 0.59990 | 0.88155 |
| 0.13011 | 0.05659 | 0.78233 |
| 0.06650 | 0.09976 | 0.87938 |
| 0.63163 | 0.55663 | 0.78722 |
| 0.43527 | 0.39882 | 0.88057 |
| 0.86949 | 0.94233 | 0.78778 |
| 0.93123 | 0.89993 | 0.11534 |
| 0.37785 | 0.44367 | 0.23008 |
| 0.93392 | 0.89910 | 0.88162 |
| 0.37964 | 0.44190 | 0.76927 |
| 0.43290 | 0.59987 | 0.11917 |
| 0.86956 | 0.05651 | 0.21741 |
| 0.93316 | 0.09968 | 0.12025 |
| 0.36835 | 0.55659 | 0.21301 |
| 0.87149 | 0.94329 | 0.21906 |
| 0.56448 | 0.39869 | 0.11900 |
| 0.13032 | 0.94229 | 0.21157 |
| 0.06575 | 0.89906 | 0.11808 |
| 0.62030 | 0.44176 | 0.23008 |
| 0.19179 | 0.99950 | 0.11330 |
| 0.93897 | 0.00229 | 0.34824 |
| 0.69226 | 0.49929 | 0.10882 |
| 0.44430 | 0.50264 | 0.35014 |
| 0.80604 | 0.99913 | 0.10385 |
| 0.06181 | 0.00026 | 0.34923 |
| 0.30759 | 0.50048 | 0.10872 |
| 0.56583 | 0.49787 | 0.34844 |
| 0.80792 | 0.99945 | 0.88606 |
| 0.06090 | 0.00236 | 0.65132 |
| 0.30769 | 0.49940 | 0.89092 |
| 0.55549 | 0.50290 | 0.64970 |
| 0.19370 | 0.99920 | 0.89554 |
| 0.93811 | 0.00033 | 0.65046 |
| 0.43376 | 0.49830 | 0.65162 |
| 0.99984 | 0.96083 | 0.17994 |
| 0.50002 | 0.47036 | 0.13265 |
| 0.99728 | 0.02918 | 0.13391 |
| 0.50121 | 0.53879 | 0.18095 |
| 0.99992 | 0.96081 | 0.81966 |
| 0.49981 | 0.47046 | 0.86722 |
| 0.00249 | 0.02921 | 0.86585 |
| 0.49879 | 0.53894 | 0.81931 |
| 0.07351 | 0.97067 | 0.00022 |
| 0.60001 | 0.46076 | 0.99974 |
| 0.90131 | 0.03893 | 0.99313 |
| 0.42757 | 0.52877 | 0.00149 |
| 0.92630 | 0.97069 | 0.99921 |
| 0.39980 | 0.46084 | 0.99995 |
| 0.09844 | 0.03895 | 0.00659 |
| 0.57233 | 0.52871 | 0.99872 |
| 0.56769 | 0.60033 | 0.11636 |
| 0.11877 | 0.05767 | 0.23400 |
| 0.06198 | 0.10069 | 0.12402 |
| 0.63190 | 0.55705 | 0.21050 |
| 0.56411 | 0.40007 | 0.87572 |
| 0.12810 | 0.94327 | 0.78066 |
| 0.06835 | 0.89988 | 0.88424 |
| 0.62179 | 0.44371 | 0.76923 |
| 0.43262 | 0.60063 | 0.88438 |
| 0.88098 | 0.05768 | 0.76580 |
| 0.70557 | 0.50321 | 0.84017 |
| 0.81659 | 0.54331 | 0.96699 |
| 0.70299 | 0.44176 | 1.03054 |
| 0.79540 | 0.51137 | 0.84272 |
| 0.91423 | 0.00011 | 0.83768 |
| 0.90980 | 0.99962 | 0.15469 |
| 0.08555 | 0.00010 | 0.16194 |
| 0.41135 | 0.49982 | 0.84178 |
| 0.41349 | 0.49959 | 0.15904 |
| 0.49988 | 0.43046 | 0.99978 |
| 0.99988 | 0.06900 | 0.99985 |
| 0.58852 | 0.49963 | 0.15818 |
| 0.58639 | 0.49964 | 0.84093 |
| 0.50003 | 0.56898 | 0.00024 |
| 0.08995 | 0.99965 | 0.84490 |
| 0.99989 | 0.93065 | 0.99977 |

## POSCAR file for gb\_p5

POSCAR file from zrtepb-gb-h2o-c.res: C: 140 F: 1 H: 114 O: 66 P: 1 ZR: 12  
34.8920000000000

0.5792995890490465 -0.0000450140396845 0.0007649282407427  
-0.0000781726227076 1.0082675674799713 0.0000166934211398  
0.0004256087542374 0.0000053656439079 0.3214078049098053

140 1 114 66 1 12

Direct

0.79165 0.88255 0.30407  
0.23212 0.21731 0.56283  
0.73080 0.71780 0.43684  
0.70512 0.68545 0.36721  
0.64765 0.69077 0.29962  
0.61904 0.66061 0.23918  
0.85367 0.81185 0.30989  
0.73439 0.64937 0.36898  
0.61330 0.59196 0.18671  
0.64654 0.62424 0.24753  
0.70448 0.61882 0.31243  
0.88325 0.84185 0.25005  
0.20575 0.18468 0.63158  
0.23331 0.78368 0.56295  
0.20720 0.81625 0.63206  
0.14633 0.81149 0.69026  
0.11676 0.84159 0.74970  
0.23879 0.85160 0.63874  
0.11207 0.90941 0.80856  
0.14682 0.87733 0.74963  
0.20840 0.88216 0.69517  
0.76121 0.85207 0.36077  
0.73483 0.28385 0.56253  
0.14437 0.18896 0.68828  
0.70823 0.31670 0.63016  
0.64552 0.31257 0.68188  
0.61493 0.34307 0.73755  
0.88810 0.90957 0.19097  
0.74039 0.35181 0.63912  
0.60907 0.41077 0.79557  
0.64537 0.37870 0.73899  
0.70860 0.38287 0.69061  
0.85322 0.87758 0.24980  
0.77245 0.21784 0.56287  
0.11483 0.15851 0.74614  
0.79974 0.18551 0.63001  
0.85974 0.19045 0.69051  
0.89009 0.15989 0.74569  
0.76939 0.14966 0.63114  
0.89557 0.09153 0.79806  
0.86125 0.12380 0.74020  
0.80027 0.11883 0.68438  
0.23779 0.14947 0.63783  
0.11132 0.09060 0.80513  
0.14537 0.12287 0.74576  
0.20730 0.11858 0.69231  
0.73212 0.71748 0.56290  
0.70610 0.68507 0.63256  
0.26859 0.71698 0.56378  
0.64630 0.69003 0.69417  
0.61696 0.65987 0.75381  
0.73690 0.64949 0.63608  
0.61167 0.59154 0.80917  
0.64590 0.62385 0.75012  
0.70615 0.61893 0.69140  
0.76797 0.78392 0.56315  
0.79385 0.81615 0.63289  
0.85199 0.81073 0.69851  
0.88069 0.84075 0.75918  
0.29433 0.68471 0.63384  
0.76378 0.85198 0.63372  
0.88684 0.90893 0.81293  
0.81339 0.52473 0.74639  
0.85225 0.87690 0.75400  
0.89030 0.50682 0.05818  
0.84385 0.54004 0.04521  
0.82301 0.55583 0.16464  
0.79317 0.88231 0.69226  
0.27101 0.28308 0.56211  
0.29880 0.31518 0.62993  
0.35792 0.30949 0.69258  
0.38886 0.33963 0.74915  
0.26973 0.35135 0.63051  
0.39596 0.40813 0.80111  
0.35271 0.68998 0.69903  
0.36135 0.37602 0.74300  
0.26788 0.28377 0.43623  
0.30113 0.38172 0.68534

|         |         |         |
|---------|---------|---------|
| 0.76722 | 0.21654 | 0.43730 |
| 0.79348 | 0.18391 | 0.36856 |
| 0.85487 | 0.18846 | 0.31207 |
| 0.29570 | 0.31606 | 0.36773 |
| 0.88465 | 0.15819 | 0.25381 |
| 0.76165 | 0.14865 | 0.36183 |
| 0.88874 | 0.09037 | 0.19443 |
| 0.38136 | 0.65997 | 0.76005 |
| 0.85433 | 0.12250 | 0.25377 |
| 0.79242 | 0.11792 | 0.30703 |
| 0.35752 | 0.31099 | 0.31319 |
| 0.26704 | 0.71648 | 0.43770 |
| 0.29276 | 0.68398 | 0.36789 |
| 0.35262 | 0.68901 | 0.30652 |
| 0.38173 | 0.65903 | 0.24576 |
| 0.26161 | 0.64847 | 0.36274 |
| 0.38701 | 0.59109 | 0.18797 |
| 0.35214 | 0.62315 | 0.24694 |
| 0.26402 | 0.64889 | 0.63577 |
| 0.29153 | 0.61810 | 0.30462 |
| 0.38892 | 0.34109 | 0.25659 |
| 0.23188 | 0.78317 | 0.43685 |
| 0.20629 | 0.81551 | 0.36698 |
| 0.14809 | 0.81025 | 0.30126 |
| 0.11936 | 0.84038 | 0.24104 |
| 0.23640 | 0.85137 | 0.36632 |
| 0.26503 | 0.35163 | 0.36021 |
| 0.11330 | 0.90871 | 0.18773 |
| 0.14781 | 0.87656 | 0.24656 |
| 0.38674 | 0.59164 | 0.81536 |
| 0.20701 | 0.88180 | 0.30817 |
| 0.39521 | 0.40918 | 0.19905 |
| 0.72904 | 0.28240 | 0.43700 |
| 0.70114 | 0.31439 | 0.36958 |
| 0.64240 | 0.30867 | 0.30570 |
| 0.61176 | 0.33892 | 0.24942 |
| 0.73017 | 0.35063 | 0.37031 |
| 0.60470 | 0.40732 | 0.19794 |
| 0.63917 | 0.37532 | 0.25689 |
| 0.69909 | 0.38108 | 0.31568 |
| 0.35265 | 0.62383 | 0.75579 |
| 0.35977 | 0.37706 | 0.25650 |
| 0.29731 | 0.38216 | 0.30709 |
| 0.74527 | 0.24877 | 0.37726 |
| 0.24872 | 0.74956 | 0.37759 |
| 0.25318 | 0.24984 | 0.62244 |
| 0.75062 | 0.75051 | 0.62282 |
| 0.25173 | 0.75060 | 0.62303 |
| 0.75654 | 0.25155 | 0.62264 |
| 0.74788 | 0.75131 | 0.37729 |
| 0.24645 | 0.25127 | 0.37664 |
| 0.29333 | 0.61857 | 0.69464 |
| 0.76654 | 0.78433 | 0.43722 |
| 0.22868 | 0.21802 | 0.43700 |
| 0.20096 | 0.18565 | 0.37009 |
| 0.14072 | 0.19060 | 0.31037 |
| 0.11014 | 0.16007 | 0.25528 |
| 0.23112 | 0.14978 | 0.36857 |
| 0.10447 | 0.09167 | 0.20239 |
| 0.13881 | 0.12395 | 0.26038 |
| 0.19990 | 0.11897 | 0.31578 |
| 0.79280 | 0.81678 | 0.36789 |
| 0.82519 | 0.47411 | 0.85466 |
| 0.79065 | 0.35495 | 0.60375 |
| 0.56634 | 0.34019 | 0.77983 |
| 0.62033 | 0.28505 | 0.67613 |
| 0.72480 | 0.59004 | 0.31882 |
| 0.23184 | 0.91020 | 0.69828 |
| 0.28786 | 0.85516 | 0.59896 |
| 0.06929 | 0.83827 | 0.79565 |
| 0.12178 | 0.78374 | 0.68617 |
| 0.78121 | 0.64537 | 0.41572 |
| 0.27976 | 0.41035 | 0.68476 |
| 0.22178 | 0.35547 | 0.58753 |
| 0.43530 | 0.33586 | 0.79778 |
| 0.57410 | 0.66433 | 0.18623 |
| 0.38026 | 0.28111 | 0.69298 |
| 0.74187 | 0.24805 | 0.27973 |
| 0.62469 | 0.71900 | 0.29763 |
| 0.77107 | 0.91072 | 0.69002 |
| 0.71675 | 0.85596 | 0.58755 |
| 0.92642 | 0.83719 | 0.81004 |
| 0.87538 | 0.78262 | 0.69851 |
| 0.24805 | 0.74929 | 0.27983 |
| 0.72733 | 0.59033 | 0.68820 |
| 0.78535 | 0.64580 | 0.59410 |
| 0.57026 | 0.66325 | 0.80232 |
| 0.62236 | 0.71797 | 0.69248 |

|         |         |          |
|---------|---------|----------|
| 0.23111 | 0.09061 | 0.69373  |
| 0.28708 | 0.14626 | 0.59862  |
| 0.06708 | 0.16144 | 0.79140  |
| 0.11942 | 0.21658 | 0.68442  |
| 0.72073 | 0.40960 | 0.31602  |
| 0.77812 | 0.35448 | 0.41349  |
| 0.56575 | 0.33524 | 0.19957  |
| 0.62016 | 0.28028 | 0.30442  |
| 0.22924 | 0.91016 | 0.31058  |
| 0.28351 | 0.85534 | 0.41225  |
| 0.07359 | 0.83685 | 0.19034  |
| 0.12465 | 0.78216 | 0.30082  |
| 0.26868 | 0.58989 | 0.30416  |
| 0.21337 | 0.64459 | 0.40536  |
| 0.42867 | 0.66247 | 0.19815  |
| 0.37689 | 0.71685 | 0.30955  |
| 0.75116 | 0.75040 | 0.72061  |
| 0.76892 | 0.08987 | 0.30526  |
| 0.71234 | 0.14527 | 0.40091  |
| 0.93240 | 0.16127 | 0.20868  |
| 0.87957 | 0.21615 | 0.31628  |
| 0.25514 | 0.24956 | 0.72012  |
| 0.22229 | 0.09061 | 0.31624  |
| 0.27979 | 0.14623 | 0.40935  |
| 0.06302 | 0.16334 | 0.20847  |
| 0.11732 | 0.21869 | 0.31081  |
| 0.71389 | 0.51716 | 0.13359  |
| 0.57656 | 0.49919 | 0.57266  |
| 0.28884 | 0.52248 | 0.85813  |
| 0.41805 | 0.49866 | 0.41888  |
| 0.50825 | 0.49857 | 0.35763  |
| 0.57595 | 0.46985 | 0.36302  |
| 0.49956 | 0.50046 | 0.64251  |
| 0.42069 | 0.47282 | 0.63148  |
| 0.36314 | 0.44411 | -0.00026 |
| 0.50013 | 0.55381 | 0.25396  |
| 0.50234 | 0.55414 | 0.74667  |
| 0.64378 | 0.44637 | 0.00134  |
| 0.30518 | 0.50076 | 0.01017  |
| 0.29631 | 0.52671 | 0.13622  |
| 0.07858 | 0.02484 | 0.38072  |
| 0.21691 | 0.02161 | 0.86377  |
| 0.19632 | 0.99906 | 0.00653  |
| 0.99424 | 0.00208 | 0.35619  |
| 0.78308 | 0.02160 | 0.13641  |
| 0.80360 | 0.99913 | 0.99374  |
| 0.92131 | 0.02477 | 0.61942  |
| 0.00560 | 0.00207 | 0.64401  |
| 0.13763 | 0.05539 | 0.00701  |
| 0.86247 | 0.05523 | 0.99310  |
| 0.00001 | 0.94474 | 0.25059  |
| 0.00023 | 0.94476 | 0.74944  |
| 0.20936 | 0.97539 | 0.14063  |
| 0.92041 | 0.98940 | 0.41691  |
| 0.79037 | 0.97560 | 0.85939  |
| 0.07944 | 0.98951 | 0.58291  |
| 0.27475 | 0.41046 | 0.30372  |
| 0.21537 | 0.35544 | 0.39734  |
| 0.43705 | 0.33753 | 0.21301  |
| 0.38132 | 0.28306 | 0.31793  |
| 0.75972 | 0.25219 | 0.72019  |
| 0.76834 | 0.91062 | 0.30058  |
| 0.71215 | 0.85565 | 0.40054  |
| 0.93071 | 0.83851 | 0.20402  |
| 0.87815 | 0.78410 | 0.31441  |
| 0.25249 | 0.75089 | 0.72078  |
| 0.27112 | 0.59019 | 0.69316  |
| 0.21682 | 0.64488 | 0.59021  |
| 0.42723 | 0.66359 | 0.81041  |
| 0.37633 | 0.71802 | 0.69843  |
| 0.74710 | 0.75158 | 0.27953  |
| 0.77781 | 0.09050 | 0.68395  |
| 0.72078 | 0.14619 | 0.58998  |
| 0.93713 | 0.16304 | 0.79271  |
| 0.88323 | 0.21852 | 0.69011  |
| 0.24455 | 0.25157 | 0.27896  |
| 0.73261 | 0.41077 | 0.69407  |
| 0.80129 | 0.50737 | 0.66766  |
| 0.79675 | 0.55415 | 0.73170  |
| 0.86714 | 0.52404 | 0.76269  |
| 0.90950 | 0.49628 | -0.02756 |
| 0.86519 | 0.48329 | 0.10479  |
| 0.93276 | 0.51588 | 0.11261  |
| 0.86581 | 0.56275 | -0.01042 |
| 0.86702 | 0.56659 | 0.21166  |
| 0.80024 | 0.53342 | 0.22032  |
| 0.78756 | 0.57932 | 0.15406  |
| 0.70772 | 0.46779 | 0.11662  |

|         |         |          |
|---------|---------|----------|
| 0.77089 | 0.45915 | 0.01567  |
| 0.43898 | 0.39975 | 0.12289  |
| 0.93738 | 0.10074 | 0.87736  |
| 0.36861 | 0.55785 | 0.79123  |
| 0.56573 | 0.60097 | 0.88096  |
| 0.12984 | 0.05675 | 0.78107  |
| 0.06586 | 0.09978 | 0.87810  |
| 0.62927 | 0.55778 | 0.78392  |
| 0.43801 | 0.39893 | 0.88005  |
| 0.86923 | 0.94284 | 0.78846  |
| 0.93282 | 0.90002 | 0.11662  |
| 0.37932 | 0.44297 | 0.22797  |
| 0.93349 | 0.89961 | 0.88285  |
| 0.38103 | 0.44186 | 0.76993  |
| 0.43464 | 0.60040 | 0.11983  |
| 0.87037 | 0.05653 | 0.21859  |
| 0.93421 | 0.09971 | 0.12178  |
| 0.36863 | 0.55719 | 0.21042  |
| 0.87264 | 0.94345 | 0.21928  |
| 0.56666 | 0.39815 | 0.11283  |
| 0.13089 | 0.94261 | 0.21233  |
| 0.06672 | 0.89944 | 0.11751  |
| 0.61490 | 0.44086 | 0.23563  |
| 0.19215 | 0.99963 | 0.11125  |
| 0.93977 | 0.00253 | 0.34853  |
| 0.69299 | 0.49359 | 0.15944  |
| 0.44269 | 0.50293 | 0.34527  |
| 0.80636 | 0.99928 | 0.10631  |
| 0.06221 | 0.00069 | 0.34912  |
| 0.30845 | 0.50104 | 0.11008  |
| 0.56369 | 0.49674 | 0.35270  |
| 0.80786 | 0.99976 | 0.88890  |
| 0.06014 | 0.00254 | 0.65152  |
| 0.30842 | 0.49932 | 0.89061  |
| 0.55527 | 0.50380 | 0.64964  |
| 0.19362 | 0.99927 | 0.89373  |
| 0.93774 | 0.00064 | 0.65109  |
| 0.43439 | 0.49861 | 0.65327  |
| 0.00067 | 0.96101 | 0.18036  |
| 0.50176 | 0.47041 | 0.13245  |
| 0.99796 | 0.02930 | 0.13413  |
| 0.50298 | 0.53901 | 0.18061  |
| 0.99957 | 0.96100 | 0.81973  |
| 0.50091 | 0.47113 | 0.86496  |
| 0.00224 | 0.02931 | 0.86593  |
| 0.49922 | 0.53924 | 0.81980  |
| 0.07370 | 0.97089 | -0.00005 |
| 0.60184 | 0.46228 | 0.99660  |
| 0.90147 | 0.03903 | 0.99438  |
| 0.42936 | 0.52877 | 0.00207  |
| 0.92658 | 0.97084 | 0.00013  |
| 0.40160 | 0.46082 | 0.99966  |
| 0.09873 | 0.03909 | 0.00570  |
| 0.57738 | 0.53023 | 0.99751  |
| 0.56759 | 0.60129 | 0.11479  |
| 0.11924 | 0.05787 | 0.23368  |
| 0.06270 | 0.10084 | 0.12289  |
| 0.63178 | 0.55825 | 0.21047  |
| 0.56573 | 0.40099 | 0.87164  |
| 0.12753 | 0.94330 | 0.78021  |
| 0.06749 | 0.89990 | 0.88326  |
| 0.62303 | 0.44471 | 0.76497  |
| 0.43315 | 0.60086 | 0.88600  |
| 0.88077 | 0.05776 | 0.76667  |
| 0.69872 | 0.49875 | 0.85028  |
| 0.78210 | 0.52891 | 0.98579  |
| 0.74322 | 0.47080 | -0.04481 |
| 0.76958 | 0.50545 | 0.86985  |
| 0.91373 | 0.00017 | 0.83882  |
| 0.91064 | 0.99972 | 0.15584  |
| 0.08637 | 0.00022 | 0.16144  |
| 0.41131 | 0.50015 | 0.84284  |
| 0.41538 | 0.49925 | 0.16168  |
| 0.50250 | 0.43115 | -0.00164 |
| 0.00018 | 0.06901 | 0.00003  |
| 0.59042 | 0.50002 | 0.15637  |
| 0.58621 | 0.50010 | 0.84000  |
| 0.50093 | 0.56922 | 0.00054  |
| 0.08953 | 0.99976 | 0.84403  |
| 0.00023 | 0.93082 | 0.00002  |

## POSCAR file for gb\_p5\_prime

POSCAR file from zrtepb-gb-h2o-c.res: C: 140 F: 1 H: 114 O: 66 P: 1 ZR: 12  
 34.89200000000000  
 0.5792995890490465 -0.0000450140396845 0.0007649282407427  
 -0.0000781726227076 1.0082675674799713 0.0000166934211398

0.0004256087542374 0.0000053656439079 0.3214078049098053  
140 1 114 66 1 12

Direct

|         |         |          |
|---------|---------|----------|
| 0.79042 | 0.88197 | 0.29985  |
| 0.23344 | 0.21712 | 0.56421  |
| 0.73231 | 0.71733 | 0.43645  |
| 0.70708 | 0.68498 | 0.36613  |
| 0.64944 | 0.69053 | 0.29905  |
| 0.62016 | 0.66046 | 0.23943  |
| 0.85549 | 0.81233 | 0.31513  |
| 0.73644 | 0.64890 | 0.36642  |
| 0.61170 | 0.59195 | 0.19007  |
| 0.64749 | 0.62403 | 0.24679  |
| 0.70645 | 0.61852 | 0.30888  |
| 0.88494 | 0.84236 | 0.25513  |
| 0.20700 | 0.18452 | 0.63325  |
| 0.23420 | 0.78456 | 0.56320  |
| 0.20783 | 0.81715 | 0.63217  |
| 0.14449 | 0.81303 | 0.68143  |
| 0.11460 | 0.84298 | 0.74101  |
| 0.24137 | 0.85160 | 0.64735  |
| 0.11177 | 0.90989 | 0.80815  |
| 0.14684 | 0.87799 | 0.74913  |
| 0.21058 | 0.88219 | 0.70309  |
| 0.76014 | 0.85138 | 0.35646  |
| 0.73237 | 0.28384 | 0.56448  |
| 0.14292 | 0.18782 | 0.67985  |
| 0.70430 | 0.31626 | 0.63247  |
| 0.63695 | 0.31491 | 0.66181  |
| 0.60687 | 0.34525 | 0.71933  |
| 0.88797 | 0.90961 | 0.19082  |
| 0.74094 | 0.34855 | 0.66314  |
| 0.60897 | 0.41041 | 0.80391  |
| 0.64293 | 0.37827 | 0.74314  |
| 0.71010 | 0.37988 | 0.71471  |
| 0.85328 | 0.87760 | 0.25007  |
| 0.77533 | 0.21903 | 0.56274  |
| 0.11318 | 0.15738 | 0.73728  |
| 0.80337 | 0.18669 | 0.62852  |
| 0.86121 | 0.19171 | 0.69538  |
| 0.89075 | 0.16095 | 0.75105  |
| 0.77455 | 0.15048 | 0.62275  |
| 0.89633 | 0.09219 | 0.79883  |
| 0.86331 | 0.12464 | 0.73956  |
| 0.80464 | 0.11950 | 0.67638  |
| 0.24129 | 0.15031 | 0.64857  |
| 0.11179 | 0.09039 | 0.80474  |
| 0.14622 | 0.12262 | 0.74575  |
| 0.21059 | 0.11925 | 0.70181  |
| 0.73216 | 0.71706 | 0.56250  |
| 0.70585 | 0.68464 | 0.63201  |
| 0.26906 | 0.71787 | 0.56491  |
| 0.64553 | 0.68973 | 0.69183  |
| 0.61634 | 0.65994 | 0.75347  |
| 0.73717 | 0.64922 | 0.63883  |
| 0.61193 | 0.59220 | 0.81466  |
| 0.64620 | 0.62414 | 0.75398  |
| 0.70703 | 0.61896 | 0.69722  |
| 0.76690 | 0.78382 | 0.56363  |
| 0.79183 | 0.81618 | 0.63404  |
| 0.84759 | 0.81036 | 0.70595  |
| 0.87643 | 0.84040 | 0.76640  |
| 0.29437 | 0.68549 | 0.63462  |
| 0.76383 | 0.85259 | 0.62953  |
| 0.88579 | 0.90908 | 0.81323  |
| 0.84298 | 0.47957 | 0.81348  |
| 0.85045 | 0.87706 | 0.75537  |
| 0.90206 | 0.54459 | -0.18587 |
| 0.82921 | 0.55316 | -0.20168 |
| 0.81308 | 0.59516 | -0.19617 |
| 0.79328 | 0.88289 | 0.68831  |
| 0.27346 | 0.28261 | 0.56192  |
| 0.30133 | 0.31501 | 0.62779  |
| 0.35776 | 0.30943 | 0.69807  |
| 0.38786 | 0.33993 | 0.75411  |
| 0.27428 | 0.35162 | 0.61928  |
| 0.39632 | 0.40885 | 0.79853  |
| 0.35079 | 0.69098 | 0.70507  |
| 0.36240 | 0.37662 | 0.73971  |
| 0.26750 | 0.28356 | 0.43650  |
| 0.30496 | 0.38234 | 0.67339  |
| 0.76840 | 0.21762 | 0.43748  |
| 0.79495 | 0.18493 | 0.36890  |
| 0.85958 | 0.18777 | 0.32459  |
| 0.29438 | 0.31612 | 0.36765  |
| 0.88892 | 0.15728 | 0.26674  |
| 0.75987 | 0.15109 | 0.35151  |
| 0.88882 | 0.09055 | 0.19624  |

|         |         |         |
|---------|---------|---------|
| 0.37938 | 0.66076 | 0.76508 |
| 0.85496 | 0.12287 | 0.25594 |
| 0.79018 | 0.11992 | 0.29816 |
| 0.35964 | 0.31328 | 0.32647 |
| 0.26606 | 0.71705 | 0.43912 |
| 0.29121 | 0.68432 | 0.36954 |
| 0.35335 | 0.68822 | 0.31538 |
| 0.38170 | 0.65808 | 0.25434 |
| 0.25722 | 0.64987 | 0.35762 |
| 0.38319 | 0.59108 | 0.18832 |
| 0.34907 | 0.62311 | 0.24868 |
| 0.26566 | 0.64923 | 0.63083 |
| 0.28644 | 0.61918 | 0.29982 |
| 0.38965 | 0.34366 | 0.26909 |
| 0.23137 | 0.78373 | 0.43738 |
| 0.20617 | 0.81601 | 0.36727 |
| 0.15127 | 0.81009 | 0.29331 |
| 0.12273 | 0.84016 | 0.23254 |
| 0.23361 | 0.85255 | 0.37380 |
| 0.25934 | 0.34979 | 0.34752 |
| 0.11343 | 0.90891 | 0.18638 |
| 0.14827 | 0.87689 | 0.24509 |
| 0.38723 | 0.59208 | 0.81354 |
| 0.20454 | 0.88284 | 0.31450 |
| 0.38992 | 0.41020 | 0.19670 |
| 0.72594 | 0.28253 | 0.43913 |
| 0.69773 | 0.31473 | 0.37328 |
| 0.64460 | 0.30850 | 0.29549 |
| 0.61386 | 0.33884 | 0.23991 |
| 0.72131 | 0.35193 | 0.38921 |
| 0.60078 | 0.40807 | 0.20399 |
| 0.63552 | 0.37596 | 0.26181 |
| 0.68997 | 0.38241 | 0.33528 |
| 0.35254 | 0.62425 | 0.75503 |
| 0.35566 | 0.37796 | 0.25605 |
| 0.29024 | 0.38093 | 0.29484 |
| 0.74404 | 0.24940 | 0.37820 |
| 0.24742 | 0.74991 | 0.37853 |
| 0.25638 | 0.24936 | 0.62311 |
| 0.74947 | 0.75028 | 0.62270 |
| 0.25317 | 0.75173 | 0.62377 |
| 0.75780 | 0.25229 | 0.62359 |
| 0.74958 | 0.75089 | 0.37734 |
| 0.24429 | 0.25136 | 0.37768 |
| 0.29490 | 0.61875 | 0.68901 |
| 0.76685 | 0.78410 | 0.43756 |
| 0.22738 | 0.21807 | 0.43883 |
| 0.19933 | 0.18568 | 0.37305 |
| 0.14133 | 0.19101 | 0.30693 |
| 0.11122 | 0.16051 | 0.25092 |
| 0.22769 | 0.14935 | 0.37782 |
| 0.10439 | 0.09182 | 0.20224 |
| 0.13813 | 0.12405 | 0.26149 |
| 0.19694 | 0.11859 | 0.32402 |
| 0.79318 | 0.81664 | 0.36844 |
| 0.75138 | 0.44630 | 0.92707 |
| 0.79401 | 0.34955 | 0.64294 |
| 0.55468 | 0.34414 | 0.74547 |
| 0.60824 | 0.28958 | 0.63845 |
| 0.72783 | 0.58996 | 0.31273 |
| 0.23547 | 0.90969 | 0.71220 |
| 0.29213 | 0.85451 | 0.61425 |
| 0.06533 | 0.84012 | 0.78069 |
| 0.11849 | 0.78593 | 0.67057 |
| 0.78331 | 0.64469 | 0.41292 |
| 0.28494 | 0.41115 | 0.66587 |
| 0.22844 | 0.35579 | 0.56955 |
| 0.43205 | 0.33623 | 0.80910 |
| 0.57474 | 0.66425 | 0.18796 |
| 0.37875 | 0.28081 | 0.70533 |
| 0.74039 | 0.24883 | 0.28070 |
| 0.62677 | 0.71882 | 0.29740 |
| 0.77286 | 0.91163 | 0.68173 |
| 0.71844 | 0.85712 | 0.57879 |
| 0.92052 | 0.83642 | 0.82140 |
| 0.86926 | 0.78185 | 0.71068 |
| 0.24619 | 0.74941 | 0.28080 |
| 0.72992 | 0.59075 | 0.69932 |
| 0.78584 | 0.64540 | 0.59773 |
| 0.56929 | 0.66353 | 0.80064 |
| 0.62111 | 0.71750 | 0.68726 |
| 0.23618 | 0.09193 | 0.70957 |
| 0.29231 | 0.14790 | 0.61642 |
| 0.06336 | 0.15959 | 0.77502 |
| 0.11618 | 0.21466 | 0.66864 |
| 0.70681 | 0.41166 | 0.34900 |
| 0.76466 | 0.35674 | 0.44520 |
| 0.57196 | 0.33472 | 0.17967 |



|          |         |          |
|----------|---------|----------|
| 0.62637  | 0.27947 | 0.28248  |
| 0.22451  | 0.91165 | 0.32231  |
| 0.27830  | 0.85713 | 0.42642  |
| 0.07922  | 0.83616 | 0.17608  |
| 0.12993  | 0.78153 | 0.28725  |
| 0.26109  | 0.59173 | 0.29414  |
| 0.20733  | 0.64710 | 0.39478  |
| 0.43022  | 0.66068 | 0.21163  |
| 0.37973  | 0.71529 | 0.32374  |
| 0.74890  | 0.75016 | 0.72047  |
| 0.76393  | 0.09286 | 0.28884  |
| 0.70855  | 0.14900 | 0.38233  |
| 0.93909  | 0.15921 | 0.23030  |
| 0.88698  | 0.21432 | 0.33745  |
| 0.25985  | 0.24898 | 0.72065  |
| 0.21799  | 0.08995 | 0.32875  |
| 0.27467  | 0.14543 | 0.42421  |
| 0.06590  | 0.16403 | 0.19892  |
| 0.11927  | 0.21943 | 0.30275  |
| 0.71084  | 0.52269 | 0.16535  |
| 0.58190  | 0.50554 | 0.57831  |
| 0.29218  | 0.52536 | 0.85294  |
| 0.41488  | 0.50230 | 0.42708  |
| 0.49075  | 0.50013 | 0.36087  |
| 0.57409  | 0.47414 | 0.37849  |
| 0.50722  | 0.49990 | 0.64456  |
| 0.42358  | 0.47347 | 0.62961  |
| 0.36058  | 0.44546 | 0.99476  |
| 0.49522  | 0.55507 | 0.25565  |
| 0.50398  | 0.55531 | 0.75085  |
| 0.64472  | 0.44984 | 0.00422  |
| 0.30339  | 0.50177 | -0.01257 |
| 0.28704  | 0.52489 | 0.13141  |
| 0.07890  | 0.02542 | 0.37835  |
| 0.21644  | 0.02183 | 0.86384  |
| 0.19626  | 0.99926 | 0.00350  |
| 0.99496  | 0.00216 | 0.35615  |
| 0.78339  | 0.02197 | 0.13677  |
| 0.80348  | 0.99947 | 0.99560  |
| 0.92038  | 0.02576 | 0.62169  |
| 0.00477  | 0.00255 | 0.64366  |
| 0.13758  | 0.05544 | 0.00701  |
| 0.86251  | 0.05562 | 0.99379  |
| -0.00005 | 0.94479 | 0.25023  |
| -0.00064 | 0.94503 | 0.74905  |
| 0.21020  | 0.97619 | 0.14081  |
| 0.92072  | 0.99112 | 0.41937  |
| 0.78999  | 0.97617 | 0.85971  |
| 0.07853  | 0.99116 | 0.58039  |
| 0.26409  | 0.40790 | 0.28254  |
| 0.20751  | 0.35181 | 0.37561  |
| 0.44027  | 0.34166 | 0.23476  |
| 0.38697  | 0.28681 | 0.34137  |
| 0.76187  | 0.25293 | 0.72102  |
| 0.76583  | 0.90961 | 0.29294  |
| 0.71004  | 0.85447 | 0.39240  |
| 0.93349  | 0.83938 | 0.21273  |
| 0.88118  | 0.78504 | 0.32338  |
| 0.25449  | 0.75229 | 0.72149  |
| 0.27384  | 0.59014 | 0.68306  |
| 0.21977  | 0.64501 | 0.58132  |
| 0.42391  | 0.66449 | 0.81910  |
| 0.37316  | 0.71932 | 0.70907  |
| 0.75007  | 0.75102 | 0.27958  |
| 0.78321  | 0.09097 | 0.67106  |
| 0.72770  | 0.14688 | 0.57566  |
| 0.93596  | 0.16414 | 0.80355  |
| 0.88364  | 0.22002 | 0.70039  |
| 0.24068  | 0.25175 | 0.28016  |
| 0.73807  | 0.40569 | 0.73506  |
| 0.84587  | 0.44833 | 0.81114  |
| 0.83319  | 0.48941 | 0.72190  |
| 0.89073  | 0.49072 | 0.84547  |
| 0.91146  | 0.51374 | 0.80985  |
| 0.91934  | 0.55510 | -0.09857 |
| 0.93154  | 0.55849 | -0.25629 |
| 0.81204  | 0.54142 | 0.71252  |
| 0.81647  | 0.60817 | -0.28540 |
| 0.84832  | 0.60988 | -0.13681 |
| 0.76243  | 0.59970 | -0.16234 |
| 0.71486  | 0.47956 | 0.11045  |
| 0.82545  | 0.49364 | 0.09510  |
| 0.43416  | 0.40069 | 0.12155  |
| 0.93746  | 0.10119 | 0.87965  |
| 0.37026  | 0.55818 | 0.78747  |
| 0.56668  | 0.60172 | 0.88809  |
| 0.13039  | 0.05655 | 0.78120  |
| 0.06591  | 0.09969 | 0.87664  |

|          |         |          |
|----------|---------|----------|
| 0.62862  | 0.55840 | 0.78852  |
| 0.43718  | 0.39976 | 0.87955  |
| 0.86863  | 0.94305 | 0.78832  |
| 0.93280  | 0.90004 | 0.11673  |
| 0.37288  | 0.44399 | 0.22320  |
| 0.93265  | 0.89975 | 0.88270  |
| 0.38242  | 0.44264 | 0.76611  |
| 0.43015  | 0.60040 | 0.11888  |
| 0.86982  | 0.05677 | 0.21931  |
| 0.93467  | 0.09982 | 0.12420  |
| 0.36469  | 0.55714 | 0.21119  |
| 0.87230  | 0.94351 | 0.21862  |
| 0.56165  | 0.39896 | 0.12042  |
| 0.13065  | 0.94283 | 0.21165  |
| 0.06698  | 0.89962 | 0.11600  |
| 0.61246  | 0.44169 | 0.24016  |
| 0.19182  | 0.00003 | 0.11072  |
| 0.94043  | 0.00258 | 0.34841  |
| 0.69291  | 0.49698 | 0.17259  |
| 0.43696  | 0.50201 | 0.34958  |
| 0.80622  | 0.99950 | 0.10668  |
| 0.06279  | 0.00089 | 0.34908  |
| 0.30571  | 0.50112 | 0.10134  |
| 0.55925  | 0.49949 | 0.35403  |
| 0.80780  | 0.00020 | 0.88952  |
| 0.05911  | 0.00292 | 0.65115  |
| 0.30805  | 0.50100 | 0.88373  |
| 0.56047  | 0.50115 | 0.65515  |
| 0.19368  | 0.99930 | 0.89370  |
| 0.93655  | 0.00126 | 0.65105  |
| 0.43734  | 0.49928 | 0.65130  |
| 0.00063  | 0.96109 | 0.18008  |
| 0.49655  | 0.47113 | 0.13460  |
| 0.99801  | 0.02940 | 0.13421  |
| 0.49716  | 0.53950 | 0.18386  |
| 0.99894  | 0.96129 | 0.81928  |
| 0.50276  | 0.47165 | 0.86876  |
| 0.00189  | 0.02954 | 0.86606  |
| 0.50081  | 0.53978 | 0.82255  |
| 0.07328  | 0.97100 | 0.99929  |
| 0.60104  | 0.46260 | 0.00901  |
| 0.90138  | 0.03931 | 0.99522  |
| 0.42715  | 0.52951 | 0.00028  |
| 0.92639  | 0.97106 | 0.00026  |
| 0.39957  | 0.46174 | -0.00436 |
| 0.09866  | 0.03917 | 0.00521  |
| 0.57418  | 0.53046 | 0.00577  |
| 0.56391  | 0.60134 | 0.12282  |
| 0.11884  | 0.05803 | 0.23355  |
| 0.06325  | 0.10103 | 0.12160  |
| 0.62947  | 0.55801 | 0.21362  |
| 0.56506  | 0.40055 | 0.87941  |
| 0.12734  | 0.94382 | 0.78045  |
| 0.06685  | 0.90019 | 0.88185  |
| 0.62553  | 0.44422 | 0.77827  |
| 0.43312  | 0.60133 | 0.88511  |
| 0.88129  | 0.05849 | 0.76736  |
| 0.70327  | 0.50019 | 0.86261  |
| 0.79382  | 0.53531 | -0.10481 |
| 0.77925  | 0.49485 | 0.07005  |
| 0.77247  | 0.49101 | 0.91078  |
| 0.91315  | 0.00048 | 0.83917  |
| 0.91075  | 0.99986 | 0.15631  |
| 0.08666  | 0.00021 | 0.16089  |
| 0.41461  | 0.50048 | 0.83922  |
| 0.40848  | 0.50036 | 0.15617  |
| 0.50031  | 0.43147 | 0.00037  |
| 0.00018  | 0.06924 | 0.00050  |
| 0.58259  | 0.50021 | 0.16630  |
| 0.59076  | 0.50108 | 0.84908  |
| 0.49946  | 0.56986 | 0.00267  |
| 0.08891  | 0.99994 | 0.84358  |
| -0.00025 | 0.93088 | -0.00045 |

## POSCAR file for gb\_product

POSCAR file from zrtepb-gb-h2o-c.res: C:

```

34.89200000000000
  0.5792995890490465 -0.0000450140396845 0.0007649282407427
-0.0000781726227076 1.0082675674799713 0.0000166934211398
  0.0004256087542374 0.0000053656439079 0.3214078049098053
140 1 114 66 1 12
Direct
0.79138 0.88310 0.30035
0.23285 0.21776 0.56402
0.73149 0.71921 0.43215
0.70675 0.68725 0.35916

```

|         |         |         |
|---------|---------|---------|
| 0.64508 | 0.69162 | 0.30430 |
| 0.61623 | 0.66159 | 0.24386 |
| 0.85725 | 0.81372 | 0.31955 |
| 0.74061 | 0.65281 | 0.34573 |
| 0.61179 | 0.59393 | 0.18630 |
| 0.64785 | 0.62629 | 0.23997 |
| 0.71079 | 0.62221 | 0.28902 |
| 0.88678 | 0.84360 | 0.25921 |
| 0.20605 | 0.18520 | 0.63296 |
| 0.23379 | 0.78391 | 0.56314 |
| 0.20743 | 0.81649 | 0.63239 |
| 0.14315 | 0.81312 | 0.67808 |
| 0.11373 | 0.84323 | 0.73774 |
| 0.24218 | 0.85038 | 0.65078 |
| 0.11269 | 0.90979 | 0.80843 |
| 0.14731 | 0.87774 | 0.74914 |
| 0.21187 | 0.88121 | 0.70621 |
| 0.76110 | 0.85266 | 0.35746 |
| 0.72946 | 0.28277 | 0.56416 |
| 0.14089 | 0.18774 | 0.67484 |
| 0.70163 | 0.31539 | 0.63112 |
| 0.63324 | 0.31636 | 0.65144 |
| 0.60424 | 0.34726 | 0.70784 |
| 0.88881 | 0.91033 | 0.19114 |
| 0.74044 | 0.34605 | 0.66841 |
| 0.61138 | 0.41121 | 0.80169 |
| 0.64286 | 0.37866 | 0.73894 |
| 0.71080 | 0.37794 | 0.71830 |
| 0.85452 | 0.87861 | 0.25192 |
| 0.77447 | 0.21855 | 0.56197 |
| 0.11153 | 0.15719 | 0.73246 |
| 0.80318 | 0.18632 | 0.62724 |
| 0.85953 | 0.19188 | 0.69770 |
| 0.88960 | 0.16129 | 0.75331 |
| 0.77630 | 0.14968 | 0.61771 |
| 0.89761 | 0.09234 | 0.79784 |
| 0.86415 | 0.12463 | 0.73845 |
| 0.80688 | 0.11893 | 0.67158 |
| 0.24161 | 0.15166 | 0.65254 |
| 0.11234 | 0.09069 | 0.80501 |
| 0.14606 | 0.12305 | 0.74535 |
| 0.21135 | 0.12042 | 0.70556 |
| 0.72767 | 0.71871 | 0.55786 |
| 0.70093 | 0.68593 | 0.62427 |
| 0.26965 | 0.71739 | 0.56346 |
| 0.64566 | 0.69150 | 0.69813 |
| 0.61733 | 0.66125 | 0.75876 |
| 0.72780 | 0.64934 | 0.61519 |
| 0.61148 | 0.59251 | 0.80900 |
| 0.64310 | 0.62462 | 0.74516 |
| 0.69852 | 0.61883 | 0.67316 |
| 0.76409 | 0.78511 | 0.56380 |
| 0.78929 | 0.81716 | 0.63577 |
| 0.84498 | 0.81085 | 0.70732 |
| 0.87474 | 0.84064 | 0.76777 |
| 0.29520 | 0.68488 | 0.63251 |
| 0.76227 | 0.85376 | 0.63135 |
| 0.88626 | 0.90934 | 0.81335 |
| 0.81846 | 0.46242 | 0.81462 |
| 0.84986 | 0.87752 | 0.75659 |
| 0.89906 | 0.54671 | 0.78595 |
| 0.82733 | 0.55133 | 0.82440 |
| 0.81348 | 0.59168 | 0.86462 |
| 0.79274 | 0.88382 | 0.68977 |
| 0.27497 | 0.28278 | 0.56132 |
| 0.30337 | 0.31509 | 0.62701 |
| 0.35840 | 0.30913 | 0.70047 |
| 0.38893 | 0.33951 | 0.75644 |
| 0.27803 | 0.35200 | 0.61524 |
| 0.39989 | 0.40856 | 0.79661 |
| 0.35103 | 0.69044 | 0.70435 |
| 0.36537 | 0.37645 | 0.73862 |
| 0.26937 | 0.28364 | 0.43592 |
| 0.30919 | 0.38258 | 0.66919 |
| 0.76728 | 0.21715 | 0.43678 |
| 0.79472 | 0.18467 | 0.36839 |
| 0.86083 | 0.18683 | 0.33150 |
| 0.29704 | 0.31604 | 0.36721 |
| 0.89043 | 0.15643 | 0.27361 |
| 0.75859 | 0.15164 | 0.34442 |
| 0.88905 | 0.09056 | 0.19573 |
| 0.37980 | 0.66019 | 0.76394 |
| 0.85514 | 0.12276 | 0.25594 |
| 0.78907 | 0.12046 | 0.29148 |
| 0.36335 | 0.31381 | 0.33142 |
| 0.26692 | 0.71684 | 0.43772 |
| 0.29227 | 0.68420 | 0.36778 |
| 0.35517 | 0.68773 | 0.31627 |

|         |         |         |
|---------|---------|---------|
| 0.38337 | 0.65758 | 0.25499 |
| 0.25751 | 0.65010 | 0.35304 |
| 0.38378 | 0.59088 | 0.18588 |
| 0.34989 | 0.62292 | 0.24664 |
| 0.26730 | 0.64844 | 0.62666 |
| 0.28658 | 0.61936 | 0.29526 |
| 0.39345 | 0.34414 | 0.27386 |
| 0.23125 | 0.78337 | 0.43737 |
| 0.20604 | 0.81580 | 0.36778 |
| 0.15203 | 0.80989 | 0.29177 |
| 0.12365 | 0.84002 | 0.23104 |
| 0.23272 | 0.85248 | 0.37670 |
| 0.26124 | 0.34911 | 0.34215 |
| 0.11375 | 0.90891 | 0.18694 |
| 0.14843 | 0.87684 | 0.24571 |
| 0.38859 | 0.59150 | 0.81057 |
| 0.20381 | 0.88282 | 0.31741 |
| 0.39239 | 0.41001 | 0.19533 |
| 0.72299 | 0.28153 | 0.43885 |
| 0.69546 | 0.31405 | 0.37365 |
| 0.64290 | 0.30842 | 0.29431 |
| 0.61333 | 0.33918 | 0.23896 |
| 0.71963 | 0.35103 | 0.39166 |
| 0.60222 | 0.40846 | 0.20394 |
| 0.63561 | 0.37607 | 0.26265 |
| 0.68949 | 0.38191 | 0.33792 |
| 0.35370 | 0.62355 | 0.75214 |
| 0.35841 | 0.37784 | 0.25551 |
| 0.29210 | 0.38026 | 0.28951 |
| 0.74169 | 0.24860 | 0.37756 |
| 0.24798 | 0.74979 | 0.37776 |
| 0.25662 | 0.24982 | 0.62280 |
| 0.74420 | 0.75169 | 0.62053 |
| 0.25315 | 0.75103 | 0.62306 |
| 0.75597 | 0.25154 | 0.62327 |
| 0.75091 | 0.75263 | 0.37530 |
| 0.24520 | 0.25164 | 0.37719 |
| 0.29668 | 0.61793 | 0.68447 |
| 0.76710 | 0.78557 | 0.43806 |
| 0.22714 | 0.21862 | 0.43865 |
| 0.19903 | 0.18614 | 0.37321 |
| 0.14211 | 0.19149 | 0.30413 |
| 0.11220 | 0.16086 | 0.24837 |
| 0.22652 | 0.14965 | 0.38133 |
| 0.10472 | 0.09198 | 0.20283 |
| 0.13820 | 0.12429 | 0.26212 |
| 0.19594 | 0.11880 | 0.32777 |
| 0.79446 | 0.81809 | 0.37086 |
| 0.64985 | 0.41650 | 0.99154 |
| 0.79409 | 0.34531 | 0.65404 |
| 0.55117 | 0.34773 | 0.72762 |
| 0.60286 | 0.29232 | 0.62229 |
| 0.73587 | 0.59468 | 0.28339 |
| 0.23778 | 0.90831 | 0.71751 |
| 0.29349 | 0.85271 | 0.62003 |
| 0.06378 | 0.84089 | 0.77493 |
| 0.11605 | 0.78650 | 0.66461 |
| 0.79058 | 0.64992 | 0.38192 |
| 0.29050 | 0.41160 | 0.65906 |
| 0.23328 | 0.35655 | 0.56269 |
| 0.43206 | 0.33547 | 0.81389 |
| 0.56786 | 0.66440 | 0.20121 |
| 0.37798 | 0.28026 | 0.71047 |
| 0.73821 | 0.24808 | 0.28003 |
| 0.61927 | 0.71888 | 0.31249 |
| 0.77326 | 0.91277 | 0.68286 |
| 0.71712 | 0.85878 | 0.58032 |
| 0.91876 | 0.83624 | 0.82265 |
| 0.86598 | 0.78216 | 0.71184 |
| 0.24705 | 0.74954 | 0.27999 |
| 0.71845 | 0.59001 | 0.66507 |
| 0.77275 | 0.64492 | 0.56277 |
| 0.57425 | 0.66518 | 0.81674 |
| 0.62440 | 0.72006 | 0.70549 |
| 0.23803 | 0.09357 | 0.71656 |
| 0.29331 | 0.14988 | 0.62355 |
| 0.06093 | 0.15886 | 0.76704 |
| 0.11310 | 0.21406 | 0.66024 |
| 0.70714 | 0.41096 | 0.35257 |
| 0.76265 | 0.35530 | 0.44893 |
| 0.57200 | 0.33554 | 0.17716 |
| 0.62429 | 0.27954 | 0.27954 |
| 0.22315 | 0.91173 | 0.32703 |
| 0.27663 | 0.85717 | 0.43134 |
| 0.08084 | 0.83600 | 0.17286 |
| 0.13120 | 0.78123 | 0.28390 |
| 0.26052 | 0.59219 | 0.28745 |
| 0.20711 | 0.64766 | 0.38816 |

|         |         |         |
|---------|---------|---------|
| 0.43236 | 0.65996 | 0.21393 |
| 0.38222 | 0.71450 | 0.32671 |
| 0.74185 | 0.75119 | 0.71824 |
| 0.76189 | 0.09393 | 0.27714 |
| 0.70635 | 0.15014 | 0.37033 |
| 0.94171 | 0.15786 | 0.24235 |
| 0.88905 | 0.21276 | 0.34975 |
| 0.25970 | 0.24954 | 0.72040 |
| 0.21632 | 0.09006 | 0.33500 |
| 0.27266 | 0.14565 | 0.43034 |
| 0.06774 | 0.16437 | 0.19399 |
| 0.12071 | 0.22002 | 0.29719 |
| 0.69700 | 0.52882 | 0.21263 |
| 0.58445 | 0.51238 | 0.58515 |
| 0.29448 | 0.52442 | 0.84940 |
| 0.41519 | 0.50202 | 0.42383 |
| 0.49189 | 0.50087 | 0.35886 |
| 0.57598 | 0.47686 | 0.38343 |
| 0.51167 | 0.49918 | 0.64434 |
| 0.42715 | 0.47359 | 0.62623 |
| 0.36365 | 0.44486 | 0.99169 |
| 0.49633 | 0.55499 | 0.25381 |
| 0.50506 | 0.55565 | 0.75031 |
| 0.64824 | 0.44955 | 0.00171 |
| 0.30552 | 0.50081 | 0.98199 |
| 0.28751 | 0.52358 | 0.12855 |
| 0.07937 | 0.02529 | 0.37944 |
| 0.21763 | 0.02187 | 0.86502 |
| 0.19710 | 0.99923 | 0.00574 |
| 0.99500 | 0.00244 | 0.35595 |
| 0.78377 | 0.02197 | 0.13463 |
| 0.80436 | 0.99976 | 0.99409 |
| 0.92241 | 0.02555 | 0.62008 |
| 0.00639 | 0.00249 | 0.64382 |
| 0.13852 | 0.05552 | 0.00772 |
| 0.86328 | 0.05579 | 0.99260 |
| 0.00056 | 0.94505 | 0.25016 |
| 0.00055 | 0.94501 | 0.74927 |
| 0.21037 | 0.97590 | 0.14178 |
| 0.92102 | 0.99068 | 0.41766 |
| 0.79093 | 0.97684 | 0.85683 |
| 0.08040 | 0.99072 | 0.58188 |
| 0.26520 | 0.40679 | 0.27348 |
| 0.20881 | 0.35067 | 0.36674 |
| 0.44490 | 0.34251 | 0.24360 |
| 0.39136 | 0.28785 | 0.35040 |
| 0.76004 | 0.25215 | 0.72072 |
| 0.76667 | 0.91065 | 0.29157 |
| 0.71072 | 0.85561 | 0.39224 |
| 0.93571 | 0.84074 | 0.21815 |
| 0.88303 | 0.78651 | 0.32949 |
| 0.25425 | 0.75134 | 0.72081 |
| 0.27618 | 0.58923 | 0.67688 |
| 0.22189 | 0.64410 | 0.57578 |
| 0.42394 | 0.66403 | 0.81888 |
| 0.37286 | 0.71890 | 0.70985 |
| 0.75342 | 0.75316 | 0.27763 |
| 0.78693 | 0.09011 | 0.66369 |
| 0.73062 | 0.14558 | 0.56738 |
| 0.93376 | 0.16487 | 0.80843 |
| 0.88049 | 0.22051 | 0.70551 |
| 0.24195 | 0.25192 | 0.27962 |
| 0.73987 | 0.40278 | 0.74383 |
| 0.79855 | 0.43467 | 0.78910 |
| 0.82401 | 0.48062 | 0.73539 |
| 0.86751 | 0.45863 | 0.85547 |
| 0.91028 | 0.51736 | 0.75825 |
| 0.93173 | 0.55386 | 0.86147 |
| 0.91121 | 0.56591 | 0.71126 |
| 0.79346 | 0.54388 | 0.75005 |
| 0.82491 | 0.61232 | 0.79342 |
| 0.84467 | 0.59845 | 0.94248 |
| 0.76118 | 0.59507 | 0.89000 |
| 0.72934 | 0.49088 | 0.15161 |
| 0.80422 | 0.45576 | 0.06688 |
| 0.43650 | 0.40051 | 0.11996 |
| 0.93814 | 0.10150 | 0.87956 |
| 0.37222 | 0.55748 | 0.78459 |
| 0.56798 | 0.60160 | 0.88615 |
| 0.13149 | 0.05692 | 0.78216 |
| 0.06639 | 0.09995 | 0.87693 |
| 0.62879 | 0.55873 | 0.78253 |
| 0.44059 | 0.39957 | 0.87804 |
| 0.86972 | 0.94338 | 0.78787 |
| 0.93321 | 0.90053 | 0.11659 |
| 0.37512 | 0.44380 | 0.22132 |
| 0.93329 | 0.89987 | 0.88242 |
| 0.38679 | 0.44239 | 0.76329 |

|         |          |          |
|---------|----------|----------|
| 0.43070 | 0.60024  | 0.11636  |
| 0.86973 | 0.05677  | 0.21780  |
| 0.93516 | 0.09997  | 0.12441  |
| 0.36530 | 0.55692  | 0.20824  |
| 0.87306 | 0.94429  | 0.21834  |
| 0.56437 | 0.39954  | 0.11801  |
| 0.13098 | 0.94284  | 0.21237  |
| 0.06735 | 0.89967  | 0.11626  |
| 0.61320 | 0.44199  | 0.24098  |
| 0.19260 | -0.00007 | 0.11183  |
| 0.94060 | 0.00306  | 0.34809  |
| 0.69230 | 0.50095  | 0.20372  |
| 0.43771 | 0.50242  | 0.34681  |
| 0.80675 | 0.99957  | 0.10437  |
| 0.06311 | 0.00092  | 0.34918  |
| 0.30765 | 0.50022  | 0.09847  |
| 0.55939 | 0.50103  | 0.35211  |
| 0.80898 | 0.00073  | 0.88730  |
| 0.06088 | 0.00300  | 0.65166  |
| 0.31061 | 0.50011  | 0.88027  |
| 0.56489 | 0.49962  | 0.65397  |
| 0.19462 | 0.99938  | 0.89462  |
| 0.93846 | 0.00115  | 0.65044  |
| 0.44131 | 0.49915  | 0.64978  |
| 0.00118 | 0.96132  | 0.17994  |
| 0.49845 | 0.47111  | 0.13310  |
| 0.99864 | 0.02965  | 0.13428  |
| 0.49830 | 0.53964  | 0.18155  |
| 0.00019 | 0.96137  | 0.81929  |
| 0.50672 | 0.47205  | 0.86838  |
| 0.00312 | 0.02969  | 0.86613  |
| 0.50319 | 0.53970  | 0.82122  |
| 0.07416 | 0.97109  | 0.99972  |
| 0.60593 | 0.46363  | 0.00946  |
| 0.90223 | 0.03954  | 0.99422  |
| 0.42887 | 0.52924  | -0.00195 |
| 0.92724 | 0.97129  | -0.00038 |
| 0.40230 | 0.46141  | 0.99315  |
| 0.09952 | 0.03931  | 0.00585  |
| 0.57619 | 0.53089  | 0.00510  |
| 0.56338 | 0.60261  | 0.11994  |
| 0.11923 | 0.05820  | 0.23431  |
| 0.06370 | 0.10113  | 0.12185  |
| 0.62927 | 0.56012  | 0.21247  |
| 0.56801 | 0.40143  | 0.87826  |
| 0.12866 | 0.94370  | 0.78114  |
| 0.06763 | 0.90016  | 0.88203  |
| 0.62911 | 0.44489  | 0.77766  |
| 0.43433 | 0.60086  | 0.88243  |
| 0.88342 | 0.05861  | 0.76554  |
| 0.70112 | 0.50399  | 0.87897  |
| 0.81422 | 0.52666  | 0.92256  |
| 0.75767 | 0.46056  | 0.04415  |
| 0.76634 | 0.48642  | 0.92135  |
| 0.91445 | 0.00062  | 0.83835  |
| 0.91139 | 0.00014  | 0.15525  |
| 0.08710 | 0.00036  | 0.16132  |
| 0.41774 | 0.50008  | 0.83678  |
| 0.40957 | 0.50024  | 0.15405  |
| 0.50307 | 0.43151  | -0.00105 |
| 0.00095 | 0.06937  | 0.00036  |
| 0.58359 | 0.50031  | 0.16564  |
| 0.59504 | 0.50169  | 0.84915  |
| 0.50047 | 0.56994  | 0.00068  |
| 0.09019 | 0.00001  | 0.84422  |
| 0.00055 | 0.93106  | 0.99919  |

## POSCAR file for gd\_solvent

```

POSCAR file from zrtepb-gd-h2o-c.res: C: 143 F: 1 H: 120 O: 66 P: 1 ZR: 12
34.89200000000000
  0.5792995890490465 -0.0000450140396845 0.0007649282407427
-0.0000781726227076 1.0082675674799713 0.0000166934211398
0.0004256087542374 0.0000053656439079 0.3214078049098053
143 1 120 66 1 12
Direct
0.79102 0.88175 0.29982
0.64919 0.62376 0.24267
0.23247 0.78362 0.43772
0.20691 0.81587 0.36790
0.15159 0.80993 0.29502
0.12298 0.83994 0.23410
0.23456 0.85236 0.37353
0.26009 0.34983 0.35104
0.11398 0.90854 0.18664
0.14883 0.87662 0.24559
0.38684 0.59189 0.81619

```

|         |         |         |
|---------|---------|---------|
| 0.20538 | 0.88261 | 0.31419 |
| 0.70904 | 0.61889 | 0.30229 |
| 0.39147 | 0.40991 | 0.20112 |
| 0.72418 | 0.28123 | 0.43930 |
| 0.69530 | 0.31311 | 0.37313 |
| 0.64057 | 0.30676 | 0.29911 |
| 0.61008 | 0.33697 | 0.24231 |
| 0.72054 | 0.35013 | 0.38432 |
| 0.60003 | 0.40601 | 0.19967 |
| 0.63371 | 0.37392 | 0.25930 |
| 0.68961 | 0.38044 | 0.32902 |
| 0.35335 | 0.62416 | 0.75594 |
| 0.88589 | 0.84219 | 0.25672 |
| 0.35669 | 0.37770 | 0.25969 |
| 0.29146 | 0.38095 | 0.29921 |
| 0.74154 | 0.24788 | 0.37876 |
| 0.24893 | 0.74996 | 0.37842 |
| 0.25571 | 0.24886 | 0.62380 |
| 0.74814 | 0.75023 | 0.62180 |
| 0.25459 | 0.75149 | 0.62367 |
| 0.75866 | 0.25177 | 0.62345 |
| 0.74955 | 0.75092 | 0.37653 |
| 0.24449 | 0.25106 | 0.37824 |
| 0.20698 | 0.18394 | 0.63304 |
| 0.29560 | 0.61881 | 0.69018 |
| 0.76696 | 0.78400 | 0.43745 |
| 0.22759 | 0.21770 | 0.43894 |
| 0.19979 | 0.18533 | 0.37268 |
| 0.14142 | 0.19054 | 0.30756 |
| 0.11143 | 0.16000 | 0.25156 |
| 0.22872 | 0.14915 | 0.37627 |
| 0.10510 | 0.09137 | 0.20242 |
| 0.13886 | 0.12364 | 0.26122 |
| 0.19810 | 0.11834 | 0.32251 |
| 0.23529 | 0.78432 | 0.56348 |
| 0.79375 | 0.81650 | 0.36890 |
| 0.20882 | 0.81681 | 0.63270 |
| 0.14572 | 0.81256 | 0.68288 |
| 0.11577 | 0.84251 | 0.74238 |
| 0.24212 | 0.85138 | 0.64708 |
| 0.11250 | 0.90949 | 0.80831 |
| 0.23325 | 0.21663 | 0.56431 |
| 0.14771 | 0.87763 | 0.74956 |
| 0.21127 | 0.88196 | 0.70277 |
| 0.76062 | 0.85119 | 0.35626 |
| 0.73249 | 0.28309 | 0.56427 |
| 0.14323 | 0.18733 | 0.68100 |
| 0.70460 | 0.31570 | 0.63179 |
| 0.63790 | 0.31357 | 0.66519 |
| 0.60714 | 0.34404 | 0.72070 |
| 0.88864 | 0.90926 | 0.19118 |
| 0.74008 | 0.34888 | 0.65720 |
| 0.73183 | 0.71735 | 0.43499 |
| 0.60638 | 0.41014 | 0.79670 |
| 0.64175 | 0.37792 | 0.73896 |
| 0.70840 | 0.38020 | 0.70726 |
| 0.85404 | 0.87736 | 0.25081 |
| 0.89999 | 0.47640 | 0.96019 |
| 0.95046 | 0.53369 | 1.10605 |
| 0.88024 | 0.48227 | 1.16947 |
| 0.77572 | 0.21835 | 0.56289 |
| 0.11368 | 0.15689 | 0.73870 |
| 0.80427 | 0.18614 | 0.62847 |
| 0.86196 | 0.19132 | 0.69560 |
| 0.89163 | 0.16065 | 0.75151 |
| 0.77582 | 0.14982 | 0.62233 |
| 0.70714 | 0.68500 | 0.36366 |
| 0.89744 | 0.09188 | 0.79963 |
| 0.86448 | 0.12427 | 0.74002 |
| 0.80604 | 0.11895 | 0.67626 |
| 0.24118 | 0.14966 | 0.64724 |
| 0.11237 | 0.08986 | 0.80543 |
| 0.14662 | 0.12207 | 0.74620 |
| 0.21069 | 0.11862 | 0.70093 |
| 0.73090 | 0.71708 | 0.56097 |
| 0.70474 | 0.68452 | 0.62977 |
| 0.27087 | 0.71778 | 0.56438 |
| 0.64836 | 0.68992 | 0.29949 |
| 0.64628 | 0.68967 | 0.69534 |
| 0.61724 | 0.65954 | 0.75568 |
| 0.73431 | 0.64854 | 0.62934 |
| 0.61118 | 0.59097 | 0.80894 |
| 0.64510 | 0.62325 | 0.74882 |
| 0.70382 | 0.61804 | 0.68556 |
| 0.76642 | 0.78368 | 0.56328 |
| 0.79164 | 0.81595 | 0.63402 |
| 0.84748 | 0.81001 | 0.70553 |
| 0.87653 | 0.83998 | 0.76619 |

|         |         |         |
|---------|---------|---------|
| 0.62004 | 0.65976 | 0.23863 |
| 0.29622 | 0.68537 | 0.63399 |
| 0.76386 | 0.85239 | 0.62978 |
| 0.88633 | 0.90863 | 0.81317 |
| 0.80723 | 0.52911 | 0.74726 |
| 0.85077 | 0.87669 | 0.75543 |
| 0.89650 | 0.50666 | 0.05922 |
| 0.85191 | 0.53930 | 0.02472 |
| 0.83826 | 0.56626 | 0.12644 |
| 0.79360 | 0.88263 | 0.68847 |
| 0.27276 | 0.28217 | 0.56306 |
| 0.85632 | 0.81221 | 0.31671 |
| 0.30024 | 0.31453 | 0.62952 |
| 0.35709 | 0.30908 | 0.69873 |
| 0.38676 | 0.33959 | 0.75535 |
| 0.27232 | 0.35095 | 0.62257 |
| 0.39385 | 0.40837 | 0.80208 |
| 0.35303 | 0.69069 | 0.70355 |
| 0.36037 | 0.37611 | 0.74261 |
| 0.26731 | 0.28323 | 0.43763 |
| 0.30252 | 0.38168 | 0.67738 |
| 0.76732 | 0.21650 | 0.43799 |
| 0.73840 | 0.64948 | 0.35992 |
| 0.79418 | 0.18385 | 0.36954 |
| 0.85917 | 0.18676 | 0.32700 |
| 0.29450 | 0.31585 | 0.36954 |
| 0.88898 | 0.15637 | 0.26944 |
| 0.75920 | 0.15006 | 0.35065 |
| 0.88924 | 0.08978 | 0.19740 |
| 0.38113 | 0.66047 | 0.76436 |
| 0.85508 | 0.12198 | 0.25716 |
| 0.78997 | 0.11898 | 0.29764 |
| 0.35957 | 0.31272 | 0.32768 |
| 0.61465 | 0.59142 | 0.18440 |
| 0.26798 | 0.71709 | 0.43858 |
| 0.29344 | 0.68452 | 0.36869 |
| 0.35504 | 0.68881 | 0.31284 |
| 0.38376 | 0.65876 | 0.25194 |
| 0.26027 | 0.64976 | 0.35837 |
| 0.38653 | 0.59133 | 0.18890 |
| 0.35207 | 0.62349 | 0.24815 |
| 0.26687 | 0.64929 | 0.63127 |
| 0.28989 | 0.61919 | 0.30071 |
| 0.39000 | 0.34312 | 0.27116 |
| 0.80640 | 0.46593 | 0.87025 |
| 0.79271 | 0.35047 | 0.63397 |
| 0.55544 | 0.34245 | 0.74954 |
| 0.61010 | 0.28754 | 0.64608 |
| 0.73142 | 0.59055 | 0.30393 |
| 0.23594 | 0.90953 | 0.71121 |
| 0.29273 | 0.85437 | 0.61334 |
| 0.06669 | 0.83956 | 0.78273 |
| 0.11995 | 0.78535 | 0.67273 |
| 0.78632 | 0.64589 | 0.40346 |
| 0.28189 | 0.41039 | 0.67134 |
| 0.22617 | 0.35491 | 0.57356 |
| 0.43130 | 0.33610 | 0.80956 |
| 0.57396 | 0.66309 | 0.18873 |
| 0.37866 | 0.28057 | 0.70468 |
| 0.73646 | 0.24700 | 0.28149 |
| 0.62418 | 0.71779 | 0.30059 |
| 0.77340 | 0.91142 | 0.68176 |
| 0.71850 | 0.85704 | 0.57901 |
| 0.92062 | 0.83585 | 0.82109 |
| 0.86906 | 0.78147 | 0.70995 |
| 0.24763 | 0.74957 | 0.28067 |
| 0.72406 | 0.58928 | 0.67916 |
| 0.78155 | 0.64451 | 0.58347 |
| 0.57162 | 0.66320 | 0.80710 |
| 0.62301 | 0.71780 | 0.69611 |
| 0.23619 | 0.09126 | 0.70801 |
| 0.29201 | 0.14721 | 0.61412 |
| 0.06411 | 0.15914 | 0.77748 |
| 0.11663 | 0.21426 | 0.67067 |
| 0.70820 | 0.40955 | 0.33683 |
| 0.76532 | 0.35477 | 0.43670 |
| 0.56716 | 0.33284 | 0.18443 |
| 0.62111 | 0.27784 | 0.28987 |
| 0.22551 | 0.91141 | 0.32132 |
| 0.27955 | 0.85693 | 0.42539 |
| 0.07921 | 0.83595 | 0.17827 |
| 0.13003 | 0.78140 | 0.28986 |
| 0.26539 | 0.59146 | 0.29660 |
| 0.21076 | 0.64666 | 0.39682 |
| 0.43191 | 0.66162 | 0.20804 |
| 0.38077 | 0.71613 | 0.31995 |
| 0.74717 | 0.75002 | 0.71959 |
| 0.76383 | 0.09192 | 0.28724 |



|          |         |          |
|----------|---------|----------|
| 0.70765  | 0.14791 | 0.38024  |
| 0.93941  | 0.15840 | 0.23428  |
| 0.88640  | 0.21332 | 0.34088  |
| 0.25891  | 0.24841 | 0.72138  |
| 0.21957  | 0.08979 | 0.32634  |
| 0.27601  | 0.14539 | 0.42176  |
| 0.06579  | 0.16341 | 0.20037  |
| 0.11901  | 0.21888 | 0.30415  |
| 0.71441  | 0.51556 | 0.15672  |
| 0.57554  | 0.49778 | 0.57572  |
| 0.28677  | 0.52265 | 0.85627  |
| 0.41502  | 0.49886 | 0.41850  |
| 0.50587  | 0.49854 | 0.35838  |
| 0.57272  | 0.46940 | 0.36389  |
| 0.49767  | 0.49983 | 0.64459  |
| 0.41907  | 0.47289 | 0.63310  |
| 0.36044  | 0.44489 | 0.00074  |
| 0.49938  | 0.55385 | 0.25470  |
| 0.50165  | 0.55377 | 0.74751  |
| 0.64281  | 0.44561 | 0.00657  |
| 0.30308  | 0.50155 | 0.01051  |
| 0.29462  | 0.52779 | 0.13545  |
| 0.08005  | 0.02493 | 0.37864  |
| 0.21712  | 0.02127 | 0.86441  |
| 0.19694  | 0.99871 | 0.00390  |
| 0.99571  | 0.00170 | 0.35670  |
| 0.78367  | 0.02130 | 0.13580  |
| 0.80416  | 0.99900 | 0.99659  |
| 0.92128  | 0.02560 | 0.62261  |
| 0.00546  | 0.00221 | 0.64394  |
| 0.13831  | 0.05488 | 0.00768  |
| 0.86310  | 0.05509 | 0.99449  |
| 0.00043  | 0.94428 | 0.25056  |
| -0.00008 | 0.94451 | 0.74934  |
| 0.21086  | 0.97565 | 0.14131  |
| 0.92163  | 0.99114 | 0.42074  |
| 0.79026  | 0.97623 | 0.85815  |
| 0.07926  | 0.99077 | 0.58093  |
| 0.26583  | 0.40816 | 0.28828  |
| 0.20840  | 0.35207 | 0.37977  |
| 0.44049  | 0.34095 | 0.23629  |
| 0.38638  | 0.28601 | 0.34134  |
| 0.76366  | 0.25265 | 0.72074  |
| 0.76640  | 0.90937 | 0.29235  |
| 0.71037  | 0.85420 | 0.39158  |
| 0.93463  | 0.83924 | 0.21500  |
| 0.88206  | 0.78495 | 0.32569  |
| 0.25595  | 0.75190 | 0.72140  |
| 0.27417  | 0.59027 | 0.68521  |
| 0.22084  | 0.64524 | 0.58202  |
| 0.42585  | 0.66405 | 0.81799  |
| 0.37595  | 0.71890 | 0.70645  |
| 0.75023  | 0.75123 | 0.27875  |
| 0.78486  | 0.09036 | 0.67088  |
| 0.72915  | 0.14607 | 0.57476  |
| 0.93674  | 0.16398 | 0.80422  |
| 0.88421  | 0.21969 | 0.70053  |
| 0.24121  | 0.25152 | 0.28067  |
| 0.73505  | 0.40686 | 0.72258  |
| 0.78795  | 0.51734 | 0.66321  |
| 0.79476  | 0.55956 | 0.75217  |
| 0.86129  | 0.52540 | 0.75044  |
| 0.87244  | 0.55509 | -0.05249 |
| 0.88447  | 0.58039 | 0.15378  |
| 0.81864  | 0.55030 | 0.20357  |
| 0.80203  | 0.58819 | 0.10131  |
| 0.71383  | 0.45528 | 0.10710  |
| 0.74971  | 0.43053 | 0.00259  |
| 0.91794  | 0.47775 | 0.86387  |
| 0.85728  | 0.45561 | 0.97266  |
| 0.94293  | 0.45593 | 0.97489  |
| 0.98380  | 0.51758 | 1.17054  |
| 0.96789  | 0.54363 | 1.01449  |
| 0.93982  | 0.56329 | 1.14274  |
| 0.87244  | 0.49842 | 1.25647  |
| 0.91864  | 0.45904 | 1.18470  |
| 0.83645  | 0.46185 | 1.17057  |
| 0.43566  | 0.40033 | 0.12599  |
| 0.93817  | 0.10092 | 0.88112  |
| 0.36851  | 0.55815 | 0.79169  |
| 0.56587  | 0.60045 | 0.88188  |
| 0.13100  | 0.05602 | 0.78191  |
| 0.06652  | 0.09914 | 0.87746  |
| 0.62851  | 0.55715 | 0.78344  |
| 0.43460  | 0.39923 | 0.88327  |
| 0.86942  | 0.94262 | 0.78815  |
| 0.93339  | 0.89966 | 0.11700  |
| 0.37479  | 0.44370 | 0.22833  |

|         |          |          |
|---------|----------|----------|
| 0.93320 | 0.89927  | 0.88269  |
| 0.37964 | 0.44207  | 0.76986  |
| 0.43452 | 0.60047  | 0.12141  |
| 0.87021 | 0.05595  | 0.22003  |
| 0.93518 | 0.09917  | 0.12574  |
| 0.36737 | 0.55752  | 0.21078  |
| 0.87291 | 0.94319  | 0.21869  |
| 0.56346 | 0.39711  | 0.11202  |
| 0.13117 | 0.94248  | 0.21178  |
| 0.06758 | 0.89921  | 0.11620  |
| 0.60956 | 0.43938  | 0.23895  |
| 0.19256 | 0.99951  | 0.11119  |
| 0.94133 | 0.00208  | 0.34894  |
| 0.69058 | 0.49180  | 0.16895  |
| 0.44023 | 0.50312  | 0.34557  |
| 0.80670 | 0.99888  | 0.10580  |
| 0.06382 | 0.00043  | 0.34937  |
| 0.30627 | 0.50200  | 0.10972  |
| 0.56113 | 0.49640  | 0.35378  |
| 0.80870 | -0.00001 | 0.88881  |
| 0.05981 | 0.00262  | 0.65151  |
| 0.30691 | 0.49979  | 0.88967  |
| 0.55401 | 0.50253  | 0.65230  |
| 0.19428 | 0.99876  | 0.89421  |
| 0.93726 | 0.00096  | 0.65116  |
| 0.43330 | 0.49864  | 0.65439  |
| 0.00124 | 0.96060  | 0.18045  |
| 0.49937 | 0.47034  | 0.13342  |
| 0.99868 | 0.02884  | 0.13476  |
| 0.50208 | 0.53892  | 0.18161  |
| 0.99958 | 0.96084  | 0.81944  |
| 0.49942 | 0.47092  | 0.86708  |
| 0.00252 | 0.02906  | 0.86673  |
| 0.49846 | 0.53905  | 0.82096  |
| 0.07384 | 0.97052  | -0.00036 |
| 0.60094 | 0.46142  | 0.00015  |
| 0.90203 | 0.03882  | 0.99579  |
| 0.42805 | 0.52908  | 0.00289  |
| 0.92702 | 0.97059  | 0.00046  |
| 0.39929 | 0.46128  | 0.00051  |
| 0.09932 | 0.03866  | 0.00582  |
| 0.57586 | 0.52957  | 0.99892  |
| 0.56756 | 0.60083  | 0.11545  |
| 0.11969 | 0.05760  | 0.23371  |
| 0.06369 | 0.10052  | 0.12211  |
| 0.63292 | 0.55767  | 0.20804  |
| 0.56208 | 0.40045  | 0.87091  |
| 0.12792 | 0.94343  | 0.78047  |
| 0.06758 | 0.89979  | 0.88201  |
| 0.62233 | 0.44400  | 0.76871  |
| 0.43289 | 0.60098  | 0.88767  |
| 0.88271 | 0.05819  | 0.76772  |
| 0.69701 | 0.49870  | 0.85843  |
| 0.78679 | 0.52490  | 0.98887  |
| 0.71363 | 0.42983  | 0.06012  |
| 0.76840 | 0.50530  | 0.86837  |
| 0.58497 | 0.49957  | 0.84211  |
| 0.58887 | 0.49945  | 0.15795  |
| 0.00080 | 0.06873  | 0.00124  |
| 0.49994 | 0.43092  | 0.00033  |
| 0.41338 | 0.49959  | 0.16217  |
| 0.40998 | 0.50041  | 0.84415  |
| 0.08740 | -0.00029 | 0.16136  |
| 0.91149 | 0.99932  | 0.15666  |
| 0.91373 | 0.00001  | 0.83933  |
| 0.50045 | 0.56905  | 0.00163  |
| 0.00034 | 0.93037  | -0.00040 |
| 0.08953 | 0.99948  | 0.84397  |

## POSCAR file for gd\_p5

POSCAR file from zrtpb-gd-h2o-c.res: C: 143 F: 1 H: 120 O: 66 P: 1 ZR: 12  
 34.89200000000000

|                     |                     |                    |
|---------------------|---------------------|--------------------|
| 0.5792995890490465  | -0.0000450140396845 | 0.0007649282407427 |
| -0.0000781726227076 | 1.0082675674799713  | 0.0000166934211398 |
| 0.0004256087542374  | 0.0000053656439079  | 0.3214078049098053 |

143 1 120 66 1 12

Direct

|         |         |         |
|---------|---------|---------|
| 0.79062 | 0.88169 | 0.29923 |
| 0.64897 | 0.62385 | 0.24266 |
| 0.23252 | 0.78370 | 0.43769 |
| 0.20695 | 0.81595 | 0.36794 |
| 0.15198 | 0.80990 | 0.29435 |
| 0.12329 | 0.83987 | 0.23340 |
| 0.23427 | 0.85251 | 0.37427 |
| 0.25997 | 0.34947 | 0.34909 |
| 0.11381 | 0.90853 | 0.18678 |

|         |         |         |
|---------|---------|---------|
| 0.14875 | 0.87662 | 0.24558 |
| 0.38541 | 0.59181 | 0.81672 |
| 0.20503 | 0.88271 | 0.31483 |
| 0.70917 | 0.61906 | 0.30120 |
| 0.39152 | 0.41003 | 0.20173 |
| 0.72370 | 0.28123 | 0.43927 |
| 0.69476 | 0.31312 | 0.37315 |
| 0.64029 | 0.30676 | 0.29853 |
| 0.60986 | 0.33698 | 0.24164 |
| 0.71978 | 0.35017 | 0.38499 |
| 0.59978 | 0.40605 | 0.19904 |
| 0.63332 | 0.37395 | 0.25902 |
| 0.68893 | 0.38047 | 0.32947 |
| 0.35224 | 0.62406 | 0.75602 |
| 0.88596 | 0.84230 | 0.25777 |
| 0.35687 | 0.37775 | 0.26015 |
| 0.29126 | 0.38070 | 0.29776 |
| 0.74136 | 0.24795 | 0.37869 |
| 0.24911 | 0.75011 | 0.37827 |
| 0.25581 | 0.24885 | 0.62351 |
| 0.74807 | 0.75031 | 0.62220 |
| 0.25427 | 0.75146 | 0.62361 |
| 0.75839 | 0.25186 | 0.62347 |
| 0.74950 | 0.75087 | 0.37691 |
| 0.24462 | 0.25095 | 0.37786 |
| 0.20667 | 0.18402 | 0.63290 |
| 0.29462 | 0.61879 | 0.68984 |
| 0.76683 | 0.78400 | 0.43768 |
| 0.22755 | 0.21766 | 0.43875 |
| 0.19967 | 0.18527 | 0.37275 |
| 0.14158 | 0.19055 | 0.30689 |
| 0.11149 | 0.16000 | 0.25106 |
| 0.22820 | 0.14900 | 0.37740 |
| 0.10477 | 0.09133 | 0.20282 |
| 0.13853 | 0.12358 | 0.26165 |
| 0.19747 | 0.11819 | 0.32385 |
| 0.23508 | 0.78432 | 0.56345 |
| 0.79356 | 0.81652 | 0.36908 |
| 0.20849 | 0.81679 | 0.63262 |
| 0.14508 | 0.81265 | 0.68159 |
| 0.11515 | 0.84258 | 0.74117 |
| 0.24208 | 0.85122 | 0.64815 |
| 0.11240 | 0.90946 | 0.80864 |
| 0.23312 | 0.21664 | 0.56413 |
| 0.14747 | 0.87758 | 0.74963 |
| 0.21128 | 0.88180 | 0.70388 |
| 0.76022 | 0.85111 | 0.35561 |
| 0.73202 | 0.28313 | 0.56423 |
| 0.14263 | 0.18729 | 0.67973 |
| 0.70415 | 0.31580 | 0.63153 |
| 0.63700 | 0.31420 | 0.66226 |
| 0.60647 | 0.34476 | 0.71767 |
| 0.88848 | 0.90931 | 0.19142 |
| 0.74020 | 0.34857 | 0.65937 |
| 0.73173 | 0.71736 | 0.43556 |
| 0.60641 | 0.41055 | 0.79610 |
| 0.64174 | 0.37827 | 0.73836 |
| 0.70881 | 0.38005 | 0.70918 |
| 0.85388 | 0.87740 | 0.25105 |
| 0.93317 | 0.49132 | 0.94388 |
| 0.98110 | 0.55337 | 0.00251 |
| 0.90889 | 0.51739 | 0.14615 |
| 0.77560 | 0.21848 | 0.56292 |
| 0.11309 | 0.15686 | 0.73751 |
| 0.80413 | 0.18623 | 0.62842 |
| 0.86141 | 0.19147 | 0.69662 |
| 0.89119 | 0.16078 | 0.75228 |
| 0.77612 | 0.14983 | 0.62107 |
| 0.70693 | 0.68501 | 0.36423 |
| 0.89752 | 0.09193 | 0.79914 |
| 0.86453 | 0.12432 | 0.73957 |
| 0.80643 | 0.11895 | 0.67481 |
| 0.24111 | 0.14987 | 0.64828 |
| 0.11219 | 0.08993 | 0.80558 |
| 0.14631 | 0.12214 | 0.74613 |
| 0.21063 | 0.11881 | 0.70190 |
| 0.73072 | 0.71714 | 0.56149 |
| 0.70431 | 0.68467 | 0.63028 |
| 0.27063 | 0.71780 | 0.56416 |
| 0.64772 | 0.68985 | 0.30134 |
| 0.64635 | 0.69013 | 0.69700 |
| 0.61678 | 0.66008 | 0.75684 |
| 0.73296 | 0.64845 | 0.62842 |
| 0.60921 | 0.59137 | 0.80766 |
| 0.64364 | 0.62358 | 0.74837 |
| 0.70196 | 0.61804 | 0.68422 |
| 0.76636 | 0.78373 | 0.56352 |
| 0.79164 | 0.81605 | 0.63401 |

|         |         |          |
|---------|---------|----------|
| 0.84740 | 0.81010 | 0.70568  |
| 0.87647 | 0.84006 | 0.76634  |
| 0.61942 | 0.65976 | 0.24013  |
| 0.29577 | 0.68533 | 0.63368  |
| 0.76399 | 0.85253 | 0.62945  |
| 0.88633 | 0.90872 | 0.81323  |
| 0.75913 | 0.54009 | 0.75755  |
| 0.85079 | 0.87679 | 0.75542  |
| 0.92061 | 0.52761 | 0.01536  |
| 0.86057 | 0.54855 | -0.03676 |
| 0.83836 | 0.58365 | 0.02988  |
| 0.79373 | 0.88276 | 0.68816  |
| 0.27307 | 0.28207 | 0.56258  |
| 0.85637 | 0.81232 | 0.31771  |
| 0.30054 | 0.31444 | 0.62899  |
| 0.35694 | 0.30893 | 0.69931  |
| 0.38638 | 0.33944 | 0.75645  |
| 0.27289 | 0.35089 | 0.62106  |
| 0.39334 | 0.40827 | 0.80285  |
| 0.35251 | 0.69055 | 0.70342  |
| 0.36021 | 0.37597 | 0.74297  |
| 0.26760 | 0.28310 | 0.43718  |
| 0.30288 | 0.38160 | 0.67633  |
| 0.76731 | 0.21662 | 0.43799  |
| 0.73851 | 0.64962 | 0.35909  |
| 0.79426 | 0.18395 | 0.36970  |
| 0.85972 | 0.18647 | 0.32930  |
| 0.29482 | 0.31574 | 0.36921  |
| 0.88931 | 0.15604 | 0.27153  |
| 0.75871 | 0.15048 | 0.34881  |
| 0.88875 | 0.08977 | 0.19707  |
| 0.38029 | 0.66029 | 0.76445  |
| 0.85473 | 0.12196 | 0.25708  |
| 0.78923 | 0.11932 | 0.29576  |
| 0.36033 | 0.31293 | 0.32939  |
| 0.61445 | 0.59157 | 0.18401  |
| 0.26798 | 0.71721 | 0.43841  |
| 0.29335 | 0.68466 | 0.36846  |
| 0.35518 | 0.68884 | 0.31337  |
| 0.38380 | 0.65877 | 0.25242  |
| 0.25982 | 0.65005 | 0.35727  |
| 0.38615 | 0.59144 | 0.18906  |
| 0.35176 | 0.62362 | 0.24800  |
| 0.26621 | 0.64932 | 0.63066  |
| 0.28935 | 0.61945 | 0.29966  |
| 0.39071 | 0.34340 | 0.27317  |
| 0.80535 | 0.46800 | 0.79981  |
| 0.79311 | 0.34978 | 0.63803  |
| 0.55442 | 0.34352 | 0.74459  |
| 0.60873 | 0.28849 | 0.64133  |
| 0.73192 | 0.59082 | 0.30184  |
| 0.23617 | 0.90930 | 0.71323  |
| 0.29288 | 0.85409 | 0.61524  |
| 0.06577 | 0.83975 | 0.78052  |
| 0.11905 | 0.78557 | 0.67039  |
| 0.78667 | 0.64606 | 0.40184  |
| 0.28252 | 0.41035 | 0.66954  |
| 0.22717 | 0.35491 | 0.57086  |
| 0.43051 | 0.33589 | 0.81167  |
| 0.57304 | 0.66309 | 0.19112  |
| 0.37834 | 0.28040 | 0.70584  |
| 0.73643 | 0.24707 | 0.28143  |
| 0.62328 | 0.71764 | 0.30354  |
| 0.77361 | 0.91157 | 0.68137  |
| 0.71875 | 0.85722 | 0.57843  |
| 0.92051 | 0.83592 | 0.82137  |
| 0.86889 | 0.78154 | 0.71034  |
| 0.24800 | 0.74977 | 0.28057  |
| 0.72146 | 0.58913 | 0.67686  |
| 0.77983 | 0.64415 | 0.58162  |
| 0.57150 | 0.66396 | 0.80911  |
| 0.62382 | 0.71845 | 0.69894  |
| 0.23633 | 0.09153 | 0.70982  |
| 0.29211 | 0.14753 | 0.61601  |
| 0.06329 | 0.15903 | 0.77546  |
| 0.11582 | 0.21411 | 0.66849  |
| 0.70738 | 0.40961 | 0.33780  |
| 0.76429 | 0.35483 | 0.43811  |
| 0.56713 | 0.33283 | 0.18330  |
| 0.62101 | 0.27781 | 0.28879  |
| 0.22489 | 0.91156 | 0.32232  |
| 0.27899 | 0.85716 | 0.42677  |
| 0.07976 | 0.83577 | 0.17706  |
| 0.13082 | 0.78128 | 0.28858  |
| 0.26463 | 0.59179 | 0.29486  |
| 0.21013 | 0.64707 | 0.39508  |
| 0.43210 | 0.66152 | 0.20897  |
| 0.38114 | 0.71607 | 0.32105  |

|         |         |          |
|---------|---------|----------|
| 0.74722 | 0.75014 | 0.71994  |
| 0.76252 | 0.09250 | 0.28389  |
| 0.70689 | 0.14863 | 0.37704  |
| 0.94011 | 0.15778 | 0.23792  |
| 0.88750 | 0.21274 | 0.34491  |
| 0.25903 | 0.24843 | 0.72105  |
| 0.21862 | 0.08958 | 0.32854  |
| 0.27526 | 0.14516 | 0.42360  |
| 0.06610 | 0.16347 | 0.19921  |
| 0.11949 | 0.21896 | 0.30273  |
| 0.71326 | 0.51600 | 0.15939  |
| 0.57353 | 0.49846 | 0.57482  |
| 0.28578 | 0.52264 | 0.85758  |
| 0.41515 | 0.49866 | 0.41891  |
| 0.50565 | 0.49871 | 0.35817  |
| 0.57269 | 0.46963 | 0.36372  |
| 0.49563 | 0.49970 | 0.64464  |
| 0.41726 | 0.47274 | 0.63432  |
| 0.35965 | 0.44504 | 0.00124  |
| 0.49907 | 0.55408 | 0.25455  |
| 0.49986 | 0.55414 | 0.74810  |
| 0.64212 | 0.44595 | 0.00517  |
| 0.30217 | 0.50159 | 0.01221  |
| 0.29391 | 0.52778 | 0.13710  |
| 0.07970 | 0.02490 | 0.37887  |
| 0.21727 | 0.02128 | 0.86484  |
| 0.19689 | 0.99872 | 0.00456  |
| 0.99540 | 0.00177 | 0.35657  |
| 0.78362 | 0.02121 | 0.13547  |
| 0.80416 | 0.99902 | 0.99618  |
| 0.92150 | 0.02542 | 0.62204  |
| 0.00563 | 0.00209 | 0.64401  |
| 0.13824 | 0.05491 | 0.00790  |
| 0.86301 | 0.05514 | 0.99374  |
| 0.00035 | 0.94431 | 0.25062  |
| 0.00011 | 0.94456 | 0.74948  |
| 0.21077 | 0.97567 | 0.14181  |
| 0.92131 | 0.99088 | 0.41994  |
| 0.79034 | 0.97638 | 0.85744  |
| 0.07954 | 0.99073 | 0.58112  |
| 0.26530 | 0.40776 | 0.28576  |
| 0.20801 | 0.35145 | 0.37642  |
| 0.44153 | 0.34145 | 0.23977  |
| 0.38753 | 0.28643 | 0.34443  |
| 0.76340 | 0.25276 | 0.72072  |
| 0.76584 | 0.90926 | 0.29116  |
| 0.70982 | 0.85406 | 0.39028  |
| 0.93489 | 0.83942 | 0.21671  |
| 0.88226 | 0.78513 | 0.32733  |
| 0.25553 | 0.75182 | 0.72131  |
| 0.27303 | 0.59030 | 0.68482  |
| 0.22028 | 0.64536 | 0.58105  |
| 0.42496 | 0.66376 | 0.81828  |
| 0.37558 | 0.71872 | 0.70645  |
| 0.75022 | 0.75112 | 0.27918  |
| 0.78558 | 0.09029 | 0.66849  |
| 0.72973 | 0.14601 | 0.57269  |
| 0.93601 | 0.16417 | 0.80576  |
| 0.88321 | 0.21992 | 0.70274  |
| 0.24136 | 0.25137 | 0.28033  |
| 0.73610 | 0.40637 | 0.72635  |
| 0.72829 | 0.52990 | 0.68323  |
| 0.73393 | 0.56409 | 0.80138  |
| 0.80775 | 0.54907 | 0.72326  |
| 0.87175 | 0.55578 | 0.86901  |
| 0.87757 | 0.60538 | 0.02997  |
| 0.82631 | 0.57660 | 0.12329  |
| 0.79406 | 0.59619 | -0.01140 |
| 0.70466 | 0.47027 | 0.12954  |
| 0.80400 | 0.43999 | -0.03252 |
| 0.93298 | 0.49684 | 0.84671  |
| 0.89600 | 0.46931 | 0.96327  |
| 0.98211 | 0.47951 | -0.03373 |
| 0.02492 | 0.53866 | 0.03843  |
| 0.99142 | 0.56004 | -0.09204 |
| 0.97554 | 0.58034 | 0.05160  |
| 0.90906 | 0.54279 | 0.20387  |
| 0.94855 | 0.49834 | 0.17754  |
| 0.86120 | 0.50262 | 0.15886  |
| 0.43567 | 0.40048 | 0.12649  |
| 0.93806 | 0.10097 | 0.88096  |
| 0.36690 | 0.55808 | 0.79255  |
| 0.56455 | 0.60084 | 0.88195  |
| 0.13092 | 0.05610 | 0.78221  |
| 0.06638 | 0.09924 | 0.87768  |
| 0.62556 | 0.55758 | 0.78026  |
| 0.43426 | 0.39919 | 0.88387  |
| 0.86944 | 0.94272 | 0.78815  |

0.93323 0.88968 0.11723  
 0.37477 0.44379 0.22914  
 0.93314 0.89934 0.88287  
 0.37871 0.44195 0.77109  
 0.43424 0.60056 0.12179  
 0.86963 0.05593 0.21936  
 0.93479 0.09918 0.12562  
 0.36695 0.55765 0.21095  
 0.87278 0.94326 0.21895  
 0.56343 0.39714 0.11101  
 0.13094 0.94248 0.21204  
 0.06739 0.89919 0.11635  
 0.60922 0.43942 0.23828  
 0.19246 0.99951 0.11159  
 0.94100 0.00226 0.34879  
 0.69005 0.49190 0.16821  
 0.44010 0.50333 0.34597  
 0.80658 0.99879 0.10529  
 0.06348 0.00040 0.34958  
 0.30553 0.50201 0.11128  
 0.56099 0.49660 0.35333  
 0.80876 0.00012 0.88833  
 0.06001 0.00252 0.65173  
 0.30586 0.49979 0.89115  
 0.55206 0.50221 0.65199  
 0.19427 0.99881 0.89458  
 0.93748 0.00083 0.65105  
 0.43143 0.49857 0.65481  
 0.00107 0.96065 0.18052  
 0.49893 0.47047 0.13328  
 0.99848 0.02890 0.13473  
 0.50171 0.53906 0.18168  
 0.99966 0.96087 0.81965  
 0.49843 0.47104 0.86701  
 0.00257 0.02913 0.86679  
 0.49683 0.53921 0.82113  
 0.07378 0.97053 0.99987  
 0.60029 0.46168 -0.00042  
 0.90194 0.03886 0.99543  
 0.42718 0.52918 0.00354  
 0.92696 0.97062 0.00043  
 0.39861 0.46133 0.00118  
 0.09921 0.03870 0.00607  
 0.57503 0.52981 0.99834  
 0.56717 0.60096 0.11558  
 0.11933 0.05754 0.23406  
 0.06339 0.10051 0.12248  
 0.63298 0.55779 0.20691  
 0.56184 0.40082 0.86977  
 0.12803 0.94341 0.78108  
 0.06741 0.89973 0.88222  
 0.62255 0.44443 0.76867  
 0.43144 0.60090 0.88823  
 0.88300 0.05823 0.76703  
 0.69456 0.50093 0.85876  
 0.80362 0.52284 0.96391  
 0.77089 0.45968 -0.02022  
 0.76710 0.50207 0.86068  
 0.58370 0.49991 0.84118  
 0.58836 0.49962 0.15729  
 0.00064 0.06881 0.00127  
 0.49957 0.43104 0.00010  
 0.41295 0.49969 0.16263  
 0.40877 0.50045 0.84494  
 0.08722 0.99973 0.16151  
 0.91132 0.99936 0.15646  
 0.91380 0.00005 0.83915  
 0.49962 0.56920 0.00171  
 0.00024 0.93038 0.99980  
 0.08957 0.99951 0.84427

## POSCAR file for gd\_p5\_prime

POSCAR file from zrtepb-gd-h2o-c.res: C: 143 F: 1 H: 120 O: 66 P: 1 ZR: 12  
 34.89200000000000  
 0.5792995890490465 -0.0000450140396845 0.0007649282407427  
 -0.0000781726227076 1.0082675674799713 0.0000166934211398  
 0.0004256087542374 0.0000053656439079 0.3214078049098053  
 143 1 120 66 1 12  
 Direct  
 0.79061 0.88165 0.29793  
 0.64889 0.62438 0.24088  
 0.23196 0.78363 0.43753  
 0.20660 0.81595 0.36763  
 0.15262 0.80982 0.29175  
 0.12397 0.83983 0.23082  
 0.23304 0.85267 0.37621

|         |         |          |
|---------|---------|----------|
| 0.26118 | 0.34899 | 0.34486  |
| 0.11338 | 0.90865 | 0.18693  |
| 0.14843 | 0.87672 | 0.24538  |
| 0.38265 | 0.59134 | 0.81783  |
| 0.20382 | 0.88291 | 0.31687  |
| 0.71121 | 0.62017 | 0.29239  |
| 0.39368 | 0.40981 | 0.20121  |
| 0.72351 | 0.28184 | 0.43963  |
| 0.69569 | 0.31422 | 0.37389  |
| 0.64228 | 0.30860 | 0.29636  |
| 0.61328 | 0.33925 | 0.23926  |
| 0.72086 | 0.35111 | 0.38908  |
| 0.60441 | 0.40842 | 0.19843  |
| 0.63699 | 0.37608 | 0.25923  |
| 0.69135 | 0.38189 | 0.33346  |
| 0.34948 | 0.62357 | 0.75710  |
| 0.88670 | 0.84268 | 0.25746  |
| 0.35901 | 0.37763 | 0.26018  |
| 0.29264 | 0.38021 | 0.29376  |
| 0.74154 | 0.24870 | 0.37865  |
| 0.24847 | 0.74996 | 0.37833  |
| 0.25580 | 0.24910 | 0.62327  |
| 0.74521 | 0.75116 | 0.62085  |
| 0.25336 | 0.75142 | 0.62375  |
| 0.75764 | 0.25217 | 0.62376  |
| 0.75151 | 0.75084 | 0.37562  |
| 0.24514 | 0.25104 | 0.37752  |
| 0.20614 | 0.18434 | 0.63275  |
| 0.29227 | 0.61844 | 0.68969  |
| 0.76771 | 0.78414 | 0.43666  |
| 0.22739 | 0.21789 | 0.43858  |
| 0.19933 | 0.18547 | 0.37284  |
| 0.14224 | 0.19091 | 0.30436  |
| 0.11208 | 0.16035 | 0.24868  |
| 0.22682 | 0.14897 | 0.38036  |
| 0.10416 | 0.09153 | 0.20337  |
| 0.13800 | 0.12375 | 0.26211  |
| 0.19597 | 0.11816 | 0.32703  |
| 0.23446 | 0.78430 | 0.56328  |
| 0.79456 | 0.81660 | 0.36838  |
| 0.20798 | 0.81684 | 0.63234  |
| 0.14389 | 0.81317 | 0.67863  |
| 0.11418 | 0.84314 | 0.73835  |
| 0.24240 | 0.85085 | 0.65057  |
| 0.11254 | 0.90969 | 0.80866  |
| 0.23282 | 0.21694 | 0.56397  |
| 0.14742 | 0.87777 | 0.74949  |
| 0.21187 | 0.88153 | 0.70630  |
| 0.76066 | 0.85100 | 0.35449  |
| 0.73112 | 0.28345 | 0.56472  |
| 0.14122 | 0.18709 | 0.67565  |
| 0.70309 | 0.31610 | 0.63178  |
| 0.63497 | 0.31576 | 0.65498  |
| 0.60483 | 0.34641 | 0.71061  |
| 0.88820 | 0.90955 | 0.19047  |
| 0.74036 | 0.34776 | 0.66625  |
| 0.73203 | 0.71767 | 0.43411  |
| 0.60733 | 0.41107 | 0.79760  |
| 0.64174 | 0.37881 | 0.73829  |
| 0.70966 | 0.37951 | 0.71577  |
| 0.85402 | 0.87759 | 0.25026  |
| 0.94774 | 0.51817 | 0.91230  |
| 0.96713 | 0.56215 | -0.25704 |
| 0.91214 | 0.58591 | -0.07122 |
| 0.77548 | 0.21897 | 0.56281  |
| 0.11177 | 0.15665 | 0.73358  |
| 0.80395 | 0.18664 | 0.62811  |
| 0.86000 | 0.19199 | 0.69946  |
| 0.88975 | 0.16126 | 0.75499  |
| 0.77706 | 0.15003 | 0.61753  |
| 0.70720 | 0.68535 | 0.36233  |
| 0.89737 | 0.09222 | 0.79845  |
| 0.86431 | 0.12463 | 0.73909  |
| 0.80736 | 0.11913 | 0.67118  |
| 0.24146 | 0.15069 | 0.65181  |
| 0.11215 | 0.09018 | 0.80579  |
| 0.14604 | 0.12240 | 0.74599  |
| 0.21114 | 0.11956 | 0.70533  |
| 0.72830 | 0.71792 | 0.55988  |
| 0.70086 | 0.68573 | 0.62802  |
| 0.26944 | 0.71767 | 0.56455  |
| 0.64575 | 0.68966 | 0.30649  |
| 0.64528 | 0.69212 | 0.70043  |
| 0.61518 | 0.66229 | 0.76041  |
| 0.72685 | 0.64889 | 0.62088  |
| 0.60491 | 0.59337 | 0.80667  |
| 0.63950 | 0.62535 | 0.74729  |
| 0.69580 | 0.61882 | 0.67809  |

0.76506 0.78429 0.56246  
0.79039 0.81657 0.63330  
0.84584 0.81036 0.70557  
0.87528 0.84020 0.76627  
0.61726 0.65968 0.24509  
0.29405 0.68508 0.63426  
0.76342 0.85319 0.62824  
0.88622 0.90892 0.81243  
0.81860 0.45970 0.79365  
0.85034 0.87707 0.75478  
0.91960 0.55216 -0.15568  
0.85237 0.54051 0.79060  
0.81582 0.57125 -0.27703  
0.79355 0.88330 0.68696  
0.27366 0.28220 0.56218  
0.85746 0.81259 0.31732  
0.30109 0.31462 0.62858  
0.35656 0.30900 0.70117  
0.38603 0.33950 0.75832  
0.27427 0.35123 0.61853  
0.39412 0.40838 0.80244  
0.35038 0.69013 0.70516  
0.36075 0.37616 0.74283  
0.26859 0.28312 0.43674  
0.30424 0.38193 0.67398  
0.76753 0.21730 0.43779  
0.74072 0.65072 0.35016  
0.79467 0.18463 0.36958  
0.86131 0.18610 0.33557  
0.29645 0.31565 0.36892  
0.89066 0.15561 0.27765  
0.75787 0.15204 0.34298  
0.88823 0.09012 0.19670  
0.37761 0.65977 0.76649  
0.85457 0.12237 0.25720  
0.78802 0.12069 0.29024  
0.36282 0.31327 0.33356  
0.61369 0.59222 0.18334  
0.26694 0.71703 0.43884  
0.29230 0.68425 0.36982  
0.35509 0.68786 0.31797  
0.38379 0.65752 0.25859  
0.25802 0.64991 0.35721  
0.38517 0.59054 0.19321  
0.35088 0.62263 0.25268  
0.26435 0.64910 0.63032  
0.28763 0.61899 0.30137  
0.39349 0.34368 0.27745  
0.73348 0.44716 0.92024  
0.79388 0.34799 0.65007  
0.55199 0.34602 0.73228  
0.60571 0.29095 0.62847  
0.73581 0.59247 0.28795  
0.23749 0.90872 0.71766  
0.29364 0.85334 0.61962  
0.06431 0.84061 0.77576  
0.11720 0.78641 0.66539  
0.79030 0.64762 0.38798  
0.28441 0.41076 0.66553  
0.22928 0.35543 0.56631  
0.42953 0.33582 0.81506  
0.56923 0.66259 0.20128  
0.37732 0.28035 0.70948  
0.73711 0.24796 0.28126  
0.61985 0.71692 0.31412  
0.77395 0.91221 0.67970  
0.71842 0.85813 0.57677  
0.91906 0.83581 0.82176  
0.86679 0.78169 0.71064  
0.24763 0.74957 0.28058  
0.71418 0.58967 0.66957  
0.77202 0.64387 0.56959  
0.57157 0.66675 0.81673  
0.62494 0.72093 0.70648  
0.23764 0.09264 0.71603  
0.29302 0.14876 0.62222  
0.06130 0.15848 0.76869  
0.11369 0.21352 0.66147  
0.70981 0.41088 0.34612  
0.76418 0.35541 0.44559  
0.57131 0.33558 0.17886  
0.62258 0.27983 0.28416  
0.22297 0.91185 0.32628  
0.27700 0.85747 0.43063  
0.08116 0.83561 0.17278  
0.13208 0.78110 0.28417  
0.26209 0.59161 0.29518  
0.20768 0.64741 0.39250



|          |         |          |
|----------|---------|----------|
| 0.43269  | 0.65988 | 0.21717  |
| 0.38166  | 0.71485 | 0.32683  |
| 0.74296  | 0.75113 | 0.71857  |
| 0.76011  | 0.09452 | 0.27408  |
| 0.70533  | 0.15094 | 0.36696  |
| 0.94238  | 0.15667 | 0.24869  |
| 0.89019  | 0.21161 | 0.35607  |
| 0.25869  | 0.24878 | 0.72088  |
| 0.21633  | 0.08941 | 0.33390  |
| 0.27311  | 0.14494 | 0.42883  |
| 0.06746  | 0.16397 | 0.19479  |
| 0.12091  | 0.21947 | 0.29791  |
| 0.71180  | 0.52469 | 0.15127  |
| 0.57375  | 0.50579 | 0.57241  |
| 0.28732  | 0.52339 | 0.86271  |
| 0.42127  | 0.50058 | 0.42935  |
| 0.49698  | 0.49994 | 0.35928  |
| 0.58050  | 0.47411 | 0.37188  |
| 0.49944  | 0.49930 | 0.64241  |
| 0.41614  | 0.47286 | 0.63312  |
| 0.36086  | 0.44472 | 0.00147  |
| 0.49898  | 0.55474 | 0.25472  |
| 0.49753  | 0.55529 | 0.74919  |
| 0.64566  | 0.45073 | -0.00817 |
| 0.30282  | 0.50073 | 0.00104  |
| 0.28955  | 0.52446 | 0.14095  |
| 0.07843  | 0.02487 | 0.37996  |
| 0.21742  | 0.02140 | 0.86632  |
| 0.19658  | 0.99891 | 0.00624  |
| 0.99436  | 0.00192 | 0.35620  |
| 0.78299  | 0.02130 | 0.13431  |
| 0.80388  | 0.99922 | 0.99396  |
| 0.92205  | 0.02549 | 0.62077  |
| 0.00616  | 0.00232 | 0.64403  |
| 0.13790  | 0.05514 | 0.00868  |
| 0.86272  | 0.05538 | 0.99288  |
| -0.00017 | 0.94452 | 0.25014  |
| 0.00018  | 0.94478 | 0.74935  |
| 0.21002  | 0.97583 | 0.14330  |
| 0.92013  | 0.99050 | 0.41816  |
| 0.79054  | 0.97645 | 0.85616  |
| 0.08002  | 0.99028 | 0.58252  |
| 0.26610  | 0.40692 | 0.27860  |
| 0.20870  | 0.35069 | 0.36902  |
| 0.44500  | 0.34196 | 0.24758  |
| 0.39045  | 0.28713 | 0.35188  |
| 0.76218  | 0.25293 | 0.72113  |
| 0.76538  | 0.90904 | 0.28914  |
| 0.71013  | 0.85361 | 0.38872  |
| 0.93577  | 0.84004 | 0.21688  |
| 0.88367  | 0.78553 | 0.32732  |
| 0.25447  | 0.75183 | 0.72150  |
| 0.27049  | 0.59000 | 0.68380  |
| 0.21868  | 0.64524 | 0.57981  |
| 0.42203  | 0.66311 | 0.82104  |
| 0.37368  | 0.71824 | 0.70883  |
| 0.75381  | 0.75087 | 0.27793  |
| 0.78734  | 0.09035 | 0.66232  |
| 0.73165  | 0.14604 | 0.56634  |
| 0.93365  | 0.16477 | 0.81083  |
| 0.88097  | 0.22058 | 0.70817  |
| 0.24216  | 0.25139 | 0.27992  |
| 0.73817  | 0.40498 | 0.73836  |
| 0.79648  | 0.43111 | 0.79521  |
| 0.81072  | 0.47166 | 0.70391  |
| 0.87195  | 0.45705 | 0.81197  |
| 0.86213  | 0.51634 | 0.73013  |
| 0.84564  | 0.58196 | -0.35226 |
| 0.80388  | 0.59552 | -0.21845 |
| 0.76912  | 0.56006 | 0.68651  |
| 0.71852  | 0.48262 | 0.08894  |
| 0.84033  | 0.48137 | 0.07009  |
| 0.95166  | 0.49289 | 0.85419  |
| 0.91641  | 0.51051 | 0.98916  |
| 0.99772  | 0.52474 | 0.94588  |
| 0.01688  | 0.56783 | -0.22073 |
| 0.97180  | 0.53847 | 0.67872  |
| 0.95133  | 0.58773 | -0.30630 |
| 0.89766  | 0.61203 | -0.11913 |
| 0.95957  | 0.59171 | -0.02614 |
| 0.87455  | 0.58013 | -0.00211 |
| 0.43719  | 0.40029 | 0.12476  |
| 0.93779  | 0.10117 | 0.88063  |
| 0.36498  | 0.55745 | 0.79292  |
| 0.56153  | 0.60258 | 0.88419  |
| 0.13115  | 0.05635 | 0.78313  |
| 0.06617  | 0.09945 | 0.87756  |
| 0.61983  | 0.55970 | 0.77605  |

|         |         |          |
|---------|---------|----------|
| 0.43571 | 0.39940 | 0.88244  |
| 0.86958 | 0.94297 | 0.78732  |
| 0.93293 | 0.90000 | 0.11621  |
| 0.37746 | 0.44364 | 0.22922  |
| 0.93306 | 0.89950 | 0.88199  |
| 0.37917 | 0.44215 | 0.77134  |
| 0.43193 | 0.59999 | 0.12347  |
| 0.86874 | 0.05630 | 0.21815  |
| 0.93448 | 0.09947 | 0.12562  |
| 0.36715 | 0.55655 | 0.21647  |
| 0.87229 | 0.94346 | 0.21787  |
| 0.56495 | 0.39938 | 0.11522  |
| 0.13022 | 0.94262 | 0.21266  |
| 0.06703 | 0.89940 | 0.11616  |
| 0.61790 | 0.44211 | 0.23196  |
| 0.19187 | 0.99969 | 0.11293  |
| 0.93989 | 0.00247 | 0.34807  |
| 0.69622 | 0.49838 | 0.15576  |
| 0.44268 | 0.50219 | 0.35129  |
| 0.80621 | 0.99900 | 0.10398  |
| 0.06221 | 0.00050 | 0.34970  |
| 0.30697 | 0.50036 | 0.11082  |
| 0.56469 | 0.49939 | 0.34866  |
| 0.80866 | 0.00027 | 0.88705  |
| 0.06053 | 0.00276 | 0.65196  |
| 0.30572 | 0.49968 | 0.89376  |
| 0.55330 | 0.50067 | 0.64978  |
| 0.19417 | 0.99901 | 0.89599  |
| 0.93806 | 0.00103 | 0.65072  |
| 0.43074 | 0.49868 | 0.65294  |
| 0.00046 | 0.96086 | 0.18008  |
| 0.49959 | 0.47103 | 0.13281  |
| 0.99786 | 0.02913 | 0.13447  |
| 0.50010 | 0.53925 | 0.18270  |
| 0.99979 | 0.96110 | 0.81945  |
| 0.49995 | 0.47155 | 0.86740  |
| 0.00263 | 0.02935 | 0.86677  |
| 0.49562 | 0.53975 | 0.82102  |
| 0.07356 | 0.97077 | 0.00007  |
| 0.60222 | 0.46323 | 0.00060  |
| 0.90165 | 0.03912 | 0.99462  |
| 0.42632 | 0.52903 | 0.00354  |
| 0.92677 | 0.97088 | -0.00032 |
| 0.39964 | 0.46118 | 0.00056  |
| 0.09891 | 0.03893 | 0.00661  |
| 0.57326 | 0.53080 | -0.00058 |
| 0.56491 | 0.60141 | 0.11835  |
| 0.11831 | 0.05771 | 0.23503  |
| 0.06305 | 0.10066 | 0.12249  |
| 0.63282 | 0.55833 | 0.20455  |
| 0.56387 | 0.40104 | 0.87385  |
| 0.12830 | 0.94363 | 0.78152  |
| 0.06744 | 0.89999 | 0.88200  |
| 0.62294 | 0.44487 | 0.77049  |
| 0.42822 | 0.60056 | 0.89009  |
| 0.88316 | 0.05849 | 0.76606  |
| 0.70678 | 0.50715 | 0.87157  |
| 0.81039 | 0.52818 | 0.88744  |
| 0.79352 | 0.48740 | 1.05957  |
| 0.77224 | 0.48781 | 0.90392  |
| 0.58647 | 0.50178 | 0.84085  |
| 0.58599 | 0.50052 | 0.15919  |
| 0.00033 | 0.06911 | 0.00114  |
| 0.50085 | 0.43136 | -0.00129 |
| 0.41151 | 0.49985 | 0.16005  |
| 0.41061 | 0.50010 | 0.84300  |
| 0.08654 | 0.99996 | 0.16197  |
| 0.91064 | 0.99963 | 0.15557  |
| 0.91393 | 0.00035 | 0.83840  |
| 0.49805 | 0.56980 | 0.00197  |
| 0.00006 | 0.93063 | 0.99932  |
| 0.08972 | 0.99977 | 0.84476  |

## POSCAR file for gd\_product

POSCAR file from zrtepb-gd-h2o-c.res: C: 143 F: 1 H: 120 O: 66 P: 1 ZR: 12  
34.89200000000000  
0.5792995890490465 -0.0000450140396845 0.0007649282407427  
-0.0000781726227076 1.0082675674799713 0.0000166934211398  
0.0004256087542374 0.0000053656439079 0.3214078049098053  
143 1 120 66 1 12  
Direct  
0.79112 0.88254 0.29865  
0.64826 0.62573 0.24078  
0.23155 0.78334 0.43758  
0.20637 0.81573 0.36763  
0.15295 0.80970 0.29037

|         |         |         |
|---------|---------|---------|
| 0.12447 | 0.83980 | 0.22956 |
| 0.23239 | 0.85253 | 0.37763 |
| 0.26220 | 0.34843 | 0.34144 |
| 0.11355 | 0.90876 | 0.18715 |
| 0.14847 | 0.87674 | 0.24554 |
| 0.38613 | 0.59145 | 0.81511 |
| 0.20332 | 0.88285 | 0.31844 |
| 0.71291 | 0.62294 | 0.28303 |
| 0.39408 | 0.40966 | 0.19819 |
| 0.72143 | 0.28086 | 0.43755 |
| 0.69441 | 0.31330 | 0.37122 |
| 0.64161 | 0.30784 | 0.29234 |
| 0.61296 | 0.33866 | 0.23567 |
| 0.71974 | 0.35009 | 0.38757 |
| 0.60379 | 0.40788 | 0.19819 |
| 0.63639 | 0.37540 | 0.25775 |
| 0.69049 | 0.38105 | 0.33263 |
| 0.35164 | 0.62356 | 0.75602 |
| 0.88731 | 0.84342 | 0.25953 |
| 0.36006 | 0.37748 | 0.25844 |
| 0.29333 | 0.37966 | 0.28976 |
| 0.74107 | 0.24801 | 0.37688 |
| 0.24850 | 0.74970 | 0.37862 |
| 0.25596 | 0.24948 | 0.62325 |
| 0.74204 | 0.75233 | 0.62098 |
| 0.25263 | 0.75114 | 0.62400 |
| 0.75370 | 0.25122 | 0.62294 |
| 0.75126 | 0.75220 | 0.37585 |
| 0.24611 | 0.25119 | 0.37733 |
| 0.20553 | 0.18488 | 0.63255 |
| 0.29461 | 0.61809 | 0.68827 |
| 0.76742 | 0.78529 | 0.43795 |
| 0.22750 | 0.21823 | 0.43857 |
| 0.19942 | 0.18578 | 0.37301 |
| 0.14324 | 0.19130 | 0.30214 |
| 0.11311 | 0.16071 | 0.24654 |
| 0.22603 | 0.14912 | 0.38302 |
| 0.10434 | 0.09175 | 0.20352 |
| 0.13814 | 0.12400 | 0.26229 |
| 0.19522 | 0.11831 | 0.32965 |
| 0.23370 | 0.78398 | 0.56333 |
| 0.79498 | 0.81767 | 0.37050 |
| 0.20728 | 0.81662 | 0.63213 |
| 0.14262 | 0.81348 | 0.67615 |
| 0.11328 | 0.84358 | 0.73582 |
| 0.24251 | 0.85026 | 0.65223 |
| 0.11295 | 0.90985 | 0.80858 |
| 0.23257 | 0.21742 | 0.56399 |
| 0.14743 | 0.87784 | 0.74905 |
| 0.21236 | 0.88109 | 0.70781 |
| 0.76111 | 0.85205 | 0.35591 |
| 0.72688 | 0.28223 | 0.56300 |
| 0.13965 | 0.18695 | 0.67080 |
| 0.69801 | 0.31496 | 0.62819 |
| 0.62959 | 0.31547 | 0.64852 |
| 0.59963 | 0.34659 | 0.70217 |
| 0.88855 | 0.91005 | 0.19034 |
| 0.73578 | 0.34642 | 0.66228 |
| 0.73020 | 0.71924 | 0.43336 |
| 0.60573 | 0.41133 | 0.79235 |
| 0.63726 | 0.37869 | 0.72991 |
| 0.70516 | 0.37856 | 0.70870 |
| 0.85452 | 0.87827 | 0.25119 |
| 0.95537 | 0.51479 | 0.92087 |
| 0.96563 | 0.56520 | 0.76788 |
| 0.91063 | 0.57953 | 0.96253 |
| 0.77369 | 0.21840 | 0.56216 |
| 0.11032 | 0.15644 | 0.72859 |
| 0.80265 | 0.18624 | 0.62761 |
| 0.85753 | 0.19205 | 0.70149 |
| 0.88786 | 0.16149 | 0.75696 |
| 0.77745 | 0.14933 | 0.61441 |
| 0.70571 | 0.68710 | 0.36043 |
| 0.89775 | 0.09237 | 0.79785 |
| 0.86413 | 0.12461 | 0.73862 |
| 0.80827 | 0.11863 | 0.66818 |
| 0.24179 | 0.15182 | 0.65554 |
| 0.11226 | 0.09050 | 0.80549 |
| 0.14575 | 0.12276 | 0.74521 |
| 0.21167 | 0.12056 | 0.70869 |
| 0.72475 | 0.71934 | 0.55895 |
| 0.69731 | 0.68689 | 0.62552 |
| 0.26924 | 0.71743 | 0.56505 |
| 0.64197 | 0.69016 | 0.31307 |
| 0.64556 | 0.69296 | 0.70703 |
| 0.61734 | 0.66273 | 0.76808 |
| 0.72035 | 0.64976 | 0.60820 |
| 0.60894 | 0.59333 | 0.81119 |

|         |         |         |
|---------|---------|---------|
| 0.63945 | 0.62567 | 0.74670 |
| 0.69058 | 0.61940 | 0.66560 |
| 0.76345 | 0.78529 | 0.56355 |
| 0.78910 | 0.81733 | 0.63496 |
| 0.84439 | 0.81083 | 0.70736 |
| 0.87440 | 0.84057 | 0.76766 |
| 0.61387 | 0.65999 | 0.25214 |
| 0.29428 | 0.68493 | 0.63486 |
| 0.76271 | 0.85410 | 0.62955 |
| 0.88659 | 0.90930 | 0.81251 |
| 0.81325 | 0.45433 | 0.79739 |
| 0.85011 | 0.87757 | 0.75558 |
| 0.92115 | 0.54938 | 0.86641 |
| 0.85444 | 0.53661 | 0.81197 |
| 0.81450 | 0.56744 | 0.75217 |
| 0.79340 | 0.88408 | 0.68787 |
| 0.27460 | 0.28242 | 0.56201 |
| 0.85801 | 0.81350 | 0.32008 |
| 0.30212 | 0.31489 | 0.62810 |
| 0.35682 | 0.30924 | 0.70254 |
| 0.38656 | 0.33979 | 0.75892 |
| 0.27624 | 0.35166 | 0.61574 |
| 0.39645 | 0.40884 | 0.79918 |
| 0.35016 | 0.69034 | 0.70665 |
| 0.36243 | 0.37660 | 0.74072 |
| 0.26998 | 0.28318 | 0.43650 |
| 0.30656 | 0.38242 | 0.67027 |
| 0.76720 | 0.21686 | 0.43691 |
| 0.74198 | 0.65385 | 0.33962 |
| 0.79518 | 0.18438 | 0.36932 |
| 0.86261 | 0.18522 | 0.34072 |
| 0.29814 | 0.31559 | 0.36852 |
| 0.89197 | 0.15481 | 0.28252 |
| 0.75762 | 0.15256 | 0.33763 |
| 0.88850 | 0.09014 | 0.19603 |
| 0.37832 | 0.66007 | 0.76712 |
| 0.85494 | 0.12229 | 0.25694 |
| 0.78767 | 0.12120 | 0.28493 |
| 0.36496 | 0.31365 | 0.33593 |
| 0.61300 | 0.59323 | 0.18572 |
| 0.26710 | 0.71680 | 0.43929 |
| 0.29273 | 0.68405 | 0.37027 |
| 0.35580 | 0.68757 | 0.31945 |
| 0.38438 | 0.65733 | 0.25924 |
| 0.25823 | 0.64985 | 0.35610 |
| 0.38526 | 0.59054 | 0.19112 |
| 0.35116 | 0.62259 | 0.25148 |
| 0.26575 | 0.64865 | 0.62980 |
| 0.28772 | 0.61902 | 0.29951 |
| 0.39536 | 0.34401 | 0.27900 |
| 0.65945 | 0.42295 | 0.95763 |
| 0.78947 | 0.34608 | 0.64820 |
| 0.54659 | 0.34659 | 0.72235 |
| 0.59991 | 0.29088 | 0.62155 |
| 0.74003 | 0.59622 | 0.27220 |
| 0.23868 | 0.90800 | 0.72063 |
| 0.29409 | 0.85234 | 0.62277 |
| 0.06298 | 0.84144 | 0.77160 |
| 0.11524 | 0.78703 | 0.66134 |
| 0.79315 | 0.65195 | 0.37099 |
| 0.28749 | 0.41135 | 0.65966 |
| 0.23181 | 0.35596 | 0.56210 |
| 0.42944 | 0.33603 | 0.81712 |
| 0.56408 | 0.66189 | 0.21457 |
| 0.37682 | 0.28048 | 0.71296 |
| 0.73813 | 0.24740 | 0.27931 |
| 0.61411 | 0.71650 | 0.32698 |
| 0.77440 | 0.91312 | 0.68026 |
| 0.71779 | 0.85922 | 0.57800 |
| 0.91811 | 0.83601 | 0.82320 |
| 0.86482 | 0.78204 | 0.71274 |
| 0.24794 | 0.74930 | 0.28086 |
| 0.70671 | 0.59025 | 0.64942 |
| 0.76238 | 0.64473 | 0.54904 |
| 0.57717 | 0.66704 | 0.83227 |
| 0.62686 | 0.72190 | 0.72023 |
| 0.23901 | 0.09406 | 0.72251 |
| 0.29393 | 0.15042 | 0.62902 |
| 0.05915 | 0.15780 | 0.76046 |
| 0.11134 | 0.21290 | 0.65333 |
| 0.70900 | 0.40998 | 0.34598 |
| 0.76293 | 0.35415 | 0.44456 |
| 0.57149 | 0.33521 | 0.17408 |
| 0.62212 | 0.27909 | 0.27885 |
| 0.22214 | 0.91182 | 0.32918 |
| 0.27587 | 0.85735 | 0.43329 |
| 0.08215 | 0.83560 | 0.17035 |
| 0.13266 | 0.78096 | 0.28148 |

|         |         |         |
|---------|---------|---------|
| 0.26186 | 0.59177 | 0.29210 |
| 0.20772 | 0.64739 | 0.39069 |
| 0.43345 | 0.65972 | 0.21846 |
| 0.38266 | 0.71442 | 0.32962 |
| 0.73925 | 0.75214 | 0.71865 |
| 0.75913 | 0.09555 | 0.26464 |
| 0.70455 | 0.15210 | 0.35784 |
| 0.94432 | 0.15536 | 0.25734 |
| 0.89198 | 0.21018 | 0.36531 |
| 0.25846 | 0.24924 | 0.72090 |
| 0.21490 | 0.08946 | 0.33852 |
| 0.27156 | 0.14495 | 0.43370 |
| 0.06923 | 0.16440 | 0.19078 |
| 0.12255 | 0.21996 | 0.29372 |
| 0.70081 | 0.52800 | 0.19753 |
| 0.58144 | 0.50132 | 0.57588 |
| 0.29189 | 0.52470 | 0.85847 |
| 0.41944 | 0.50245 | 0.42802 |
| 0.49499 | 0.49942 | 0.35956 |
| 0.57857 | 0.47319 | 0.37170 |
| 0.50638 | 0.50152 | 0.64344 |
| 0.42362 | 0.47340 | 0.62999 |
| 0.36267 | 0.44487 | 0.99659 |
| 0.49859 | 0.55435 | 0.25528 |
| 0.50347 | 0.55549 | 0.75010 |
| 0.64634 | 0.44843 | 0.99266 |
| 0.30463 | 0.50091 | 0.98999 |
| 0.28870 | 0.52342 | 0.13824 |
| 0.07838 | 0.02503 | 0.38029 |
| 0.21801 | 0.02166 | 0.86663 |
| 0.19697 | 0.99914 | 0.00743 |
| 0.99420 | 0.00217 | 0.35598 |
| 0.78296 | 0.02137 | 0.13295 |
| 0.80424 | 0.99952 | 0.99294 |
| 0.92309 | 0.02559 | 0.61983 |
| 0.00698 | 0.00245 | 0.64384 |
| 0.13830 | 0.05544 | 0.00882 |
| 0.86312 | 0.05563 | 0.99192 |
| 0.00015 | 0.94478 | 0.25001 |
| 0.00087 | 0.94500 | 0.74914 |
| 0.21009 | 0.97583 | 0.14349 |
| 0.92004 | 0.99043 | 0.41708 |
| 0.79093 | 0.97694 | 0.85443 |
| 0.08098 | 0.99026 | 0.58301 |
| 0.26626 | 0.40605 | 0.27230 |
| 0.20946 | 0.34978 | 0.36384 |
| 0.44723 | 0.34257 | 0.25100 |
| 0.39314 | 0.28790 | 0.35682 |
| 0.75696 | 0.25190 | 0.72048 |
| 0.76597 | 0.90992 | 0.28900 |
| 0.71050 | 0.85472 | 0.38979 |
| 0.93643 | 0.84071 | 0.21916 |
| 0.88416 | 0.78644 | 0.33082 |
| 0.25341 | 0.75158 | 0.72176 |
| 0.27371 | 0.58947 | 0.68108 |
| 0.22032 | 0.64444 | 0.57888 |
| 0.42249 | 0.66376 | 0.82209 |
| 0.37250 | 0.71868 | 0.71158 |
| 0.75466 | 0.75233 | 0.27827 |
| 0.78958 | 0.08963 | 0.65734 |
| 0.73300 | 0.14492 | 0.56087 |
| 0.93089 | 0.16536 | 0.81474 |
| 0.87721 | 0.22087 | 0.71227 |
| 0.24352 | 0.25146 | 0.27969 |
| 0.73340 | 0.40395 | 0.73151 |
| 0.80648 | 0.42379 | 0.81212 |
| 0.79677 | 0.46182 | 0.70667 |
| 0.86593 | 0.46159 | 0.80594 |
| 0.86722 | 0.51478 | 0.74401 |
| 0.84098 | 0.58039 | 0.67622 |
| 0.80077 | 0.59002 | 0.81579 |
| 0.76810 | 0.55477 | 0.71973 |
| 0.72895 | 0.48882 | 0.13559 |
| 0.79358 | 0.44064 | 0.02842 |
| 0.96422 | 0.49256 | 0.85296 |
| 0.92572 | 0.50207 | 0.99330 |
| 0.00388 | 0.52282 | 0.95821 |
| 0.01514 | 0.57172 | 0.80392 |
| 0.97215 | 0.54433 | 0.69508 |
| 0.94560 | 0.59162 | 0.72929 |
| 0.89086 | 0.60617 | 0.92492 |
| 0.95799 | 0.58628 | 0.00659 |
| 0.87561 | 0.56946 | 0.03127 |
| 0.43754 | 0.40015 | 0.12165 |
| 0.93794 | 0.10145 | 0.88026 |
| 0.36942 | 0.55746 | 0.78918 |
| 0.56501 | 0.60223 | 0.88791 |
| 0.13161 | 0.05671 | 0.78327 |

|         |          |         |
|---------|----------|---------|
| 0.06627 | 0.09978  | 0.87726 |
| 0.62747 | 0.55973  | 0.78625 |
| 0.43766 | 0.39980  | 0.87969 |
| 0.87024 | 0.94335  | 0.78690 |
| 0.93309 | 0.90034  | 0.11596 |
| 0.37727 | 0.44342  | 0.22531 |
| 0.93345 | 0.89978  | 0.88185 |
| 0.38264 | 0.44266  | 0.76693 |
| 0.43179 | 0.59999  | 0.12090 |
| 0.86878 | 0.05634  | 0.21693 |
| 0.93485 | 0.09960  | 0.12534 |
| 0.36726 | 0.55656  | 0.21438 |
| 0.87255 | 0.94398  | 0.21732 |
| 0.56523 | 0.39916  | 0.11333 |
| 0.13044 | 0.94272  | 0.21300 |
| 0.06722 | 0.89956  | 0.11624 |
| 0.61611 | 0.44140  | 0.23430 |
| 0.19226 | 0.99982  | 0.11339 |
| 0.93980 | 0.00280  | 0.34769 |
| 0.69435 | 0.50025  | 0.19044 |
| 0.44093 | 0.50158  | 0.34997 |
| 0.80637 | 0.99915  | 0.10248 |
| 0.06219 | 0.00069  | 0.34965 |
| 0.30819 | 0.50007  | 0.10675 |
| 0.56290 | 0.49868  | 0.35037 |
| 0.80922 | 0.00068  | 0.88559 |
| 0.06141 | 0.00294  | 0.65202 |
| 0.30837 | 0.50035  | 0.88834 |
| 0.55954 | 0.50510  | 0.65263 |
| 0.19463 | 0.99931  | 0.89627 |
| 0.93899 | 0.00116  | 0.65016 |
| 0.43690 | 0.49931  | 0.65144 |
| 0.00071 | 0.96111  | 0.17991 |
| 0.49943 | 0.47070  | 0.13310 |
| 0.99816 | 0.02938  | 0.13423 |
| 0.49996 | 0.53909  | 0.18280 |
| 0.00045 | 0.96132  | 0.81927 |
| 0.50411 | 0.47231  | 0.86810 |
| 0.00326 | 0.02960  | 0.86647 |
| 0.50080 | 0.53995  | 0.82192 |
| 0.07403 | 0.97101  | 0.00019 |
| 0.60499 | 0.46334  | 0.00331 |
| 0.90206 | 0.03938  | 0.99384 |
| 0.42812 | 0.52911  | 0.00137 |
| 0.92720 | 0.97113  | 0.99909 |
| 0.40135 | 0.46139  | 0.99673 |
| 0.09933 | 0.03919  | 0.00675 |
| 0.57573 | 0.53060  | 0.00291 |
| 0.56407 | 0.60198  | 0.12085 |
| 0.11843 | 0.05794  | 0.23538 |
| 0.06336 | 0.10088  | 0.12242 |
| 0.63161 | 0.55942  | 0.20938 |
| 0.56494 | 0.40145  | 0.87320 |
| 0.12899 | 0.94376  | 0.78171 |
| 0.06783 | 0.90019  | 0.88199 |
| 0.62142 | 0.44508  | 0.76474 |
| 0.43174 | 0.60073  | 0.88713 |
| 0.88409 | 0.05861  | 0.76495 |
| 0.70021 | 0.50093  | 0.86439 |
| 0.81611 | 0.51989  | 0.90464 |
| 0.75871 | 0.46029  | 0.03559 |
| 0.76428 | 0.48127  | 0.90344 |
| 0.59264 | 0.50182  | 0.84497 |
| 0.58500 | 0.49985  | 0.16201 |
| 0.00072 | 0.06934  | 0.00074 |
| 0.50208 | 0.43156  | 0.99767 |
| 0.41085 | 0.49990  | 0.15773 |
| 0.41514 | 0.50032  | 0.84001 |
| 0.08672 | 0.00021  | 0.16214 |
| 0.91089 | 0.99991  | 0.15477 |
| 0.91457 | 0.00060  | 0.83771 |
| 0.49984 | 0.56970  | 0.00225 |
| 0.00054 | 0.93090  | 0.99911 |
| 0.09042 | -0.00000 | 0.84484 |

POSCAR files for ipa solvent

POSCAR file for gb\_solvent

POSCAR file from zrtepb-gb-ipa-c.res: C: 143 F: 1 H: 120 O: 66 P: 1 ZR: 12  
 34.8920000000000  
 0.5792995890490465 -0.0000450140396845 0.0007649282407427  
 -0.0000781726227076 1.0082675674799713 0.0000166934211398  
 0.0004256087542374 0.0000053656439079 0.3214078049098053  
 143 1 120 66 1 12

Direct

|         |         |         |
|---------|---------|---------|
| 0.79023 | 0.88207 | 0.30393 |
| 0.23310 | 0.21668 | 0.56282 |
| 0.73274 | 0.71652 | 0.43658 |
| 0.70744 | 0.68401 | 0.36688 |
| 0.64843 | 0.68909 | 0.30333 |
| 0.61972 | 0.65899 | 0.24289 |
| 0.85218 | 0.81132 | 0.30654 |
| 0.73821 | 0.64833 | 0.36384 |
| 0.61426 | 0.59095 | 0.18651 |
| 0.64889 | 0.62299 | 0.24586 |
| 0.70878 | 0.61791 | 0.30542 |
| 0.88141 | 0.84152 | 0.24703 |
| 0.20723 | 0.18404 | 0.63189 |
| 0.23333 | 0.78352 | 0.56310 |
| 0.20768 | 0.81611 | 0.63258 |
| 0.14734 | 0.81133 | 0.69266 |
| 0.11810 | 0.84151 | 0.75223 |
| 0.23920 | 0.85152 | 0.63824 |
| 0.11299 | 0.90939 | 0.80970 |
| 0.14801 | 0.87731 | 0.75118 |
| 0.20926 | 0.88210 | 0.69541 |
| 0.76032 | 0.85148 | 0.36115 |
| 0.73406 | 0.28376 | 0.56356 |
| 0.14644 | 0.18870 | 0.69039 |
| 0.70706 | 0.31636 | 0.63162 |
| 0.64542 | 0.31144 | 0.68693 |
| 0.61409 | 0.34168 | 0.74261 |
| 0.88657 | 0.90941 | 0.18987 |
| 0.73765 | 0.35199 | 0.63765 |
| 0.60723 | 0.40976 | 0.79857 |
| 0.64306 | 0.37773 | 0.74138 |
| 0.70544 | 0.38269 | 0.69015 |
| 0.85151 | 0.87731 | 0.24822 |
| 0.77032 | 0.21742 | 0.56295 |
| 0.11678 | 0.15842 | 0.74883 |
| 0.79758 | 0.18507 | 0.63030 |
| 0.85805 | 0.19018 | 0.68918 |
| 0.88899 | 0.15982 | 0.74442 |
| 0.76743 | 0.14920 | 0.63316 |
| 0.89552 | 0.09146 | 0.79720 |
| 0.86040 | 0.12367 | 0.74037 |
| 0.79895 | 0.11854 | 0.68626 |
| 0.23871 | 0.14865 | 0.63728 |
| 0.11203 | 0.09045 | 0.80654 |
| 0.14659 | 0.12261 | 0.74747 |
| 0.20811 | 0.11795 | 0.69265 |
| 0.73325 | 0.71640 | 0.56275 |
| 0.70803 | 0.68386 | 0.63287 |
| 0.26725 | 0.71658 | 0.56322 |
| 0.64846 | 0.68875 | 0.69534 |
| 0.61971 | 0.65861 | 0.75586 |
| 0.73945 | 0.64842 | 0.63740 |
| 0.61423 | 0.59063 | 0.81187 |
| 0.64936 | 0.62273 | 0.75363 |
| 0.70995 | 0.61791 | 0.69561 |
| 0.76700 | 0.78333 | 0.56257 |
| 0.79259 | 0.81569 | 0.63248 |
| 0.85114 | 0.81022 | 0.69713 |
| 0.88032 | 0.84017 | 0.75765 |
| 0.29257 | 0.68415 | 0.63323 |
| 0.76254 | 0.85157 | 0.63485 |
| 0.88700 | 0.90840 | 0.81225 |
| 0.82264 | 0.53180 | 0.69660 |
| 0.85191 | 0.87636 | 0.75388 |
| 0.89930 | 0.51162 | 1.09541 |
| 0.85735 | 0.54778 | 1.07897 |
| 0.81141 | 0.55166 | 1.18796 |
| 0.79228 | 0.88178 | 0.69372 |
| 0.75606 | 0.41591 | 1.02650 |
| 0.80466 | 0.42594 | 0.92541 |
| 0.26917 | 0.28300 | 0.56212 |
| 0.79518 | 0.41524 | 1.14423 |
| 0.29653 | 0.31519 | 0.62980 |
| 0.35632 | 0.30969 | 0.69058 |
| 0.38707 | 0.33983 | 0.74723 |
| 0.26684 | 0.35119 | 0.63174 |
| 0.39366 | 0.40810 | 0.80099 |
| 0.35135 | 0.68938 | 0.69738 |
| 0.35886 | 0.37608 | 0.74273 |
| 0.26581 | 0.28375 | 0.43617 |
| 0.29811 | 0.38161 | 0.68649 |
| 0.76685 | 0.21667 | 0.43701 |
| 0.79265 | 0.18401 | 0.36792 |
| 0.85326 | 0.18868 | 0.30882 |
| 0.29271 | 0.31635 | 0.36795 |
| 0.88285 | 0.15838 | 0.25040 |
| 0.76125 | 0.14858 | 0.36304 |

|         |         |         |
|---------|---------|---------|
| 0.88766 | 0.09037 | 0.19317 |
| 0.38010 | 0.65938 | 0.75820 |
| 0.85314 | 0.12254 | 0.25229 |
| 0.79176 | 0.11787 | 0.30764 |
| 0.35432 | 0.31143 | 0.31255 |
| 0.26672 | 0.71642 | 0.43704 |
| 0.29196 | 0.68387 | 0.36703 |
| 0.35159 | 0.68871 | 0.30472 |
| 0.38032 | 0.65855 | 0.24435 |
| 0.26045 | 0.64844 | 0.36242 |
| 0.38583 | 0.59059 | 0.18854 |
| 0.35061 | 0.62269 | 0.24657 |
| 0.26202 | 0.64840 | 0.63622 |
| 0.28994 | 0.61790 | 0.30437 |
| 0.38558 | 0.34167 | 0.25667 |
| 0.23276 | 0.78331 | 0.43693 |
| 0.20716 | 0.81567 | 0.36700 |
| 0.14856 | 0.81020 | 0.30246 |
| 0.11932 | 0.84014 | 0.24206 |
| 0.23719 | 0.85156 | 0.36465 |
| 0.26209 | 0.35197 | 0.36189 |
| 0.11275 | 0.90837 | 0.18732 |
| 0.14776 | 0.87634 | 0.24579 |
| 0.38594 | 0.59128 | 0.81437 |
| 0.20739 | 0.88176 | 0.30588 |
| 0.39244 | 0.40973 | 0.20079 |
| 0.73078 | 0.28298 | 0.43761 |
| 0.70338 | 0.31514 | 0.36988 |
| 0.64358 | 0.30960 | 0.30913 |
| 0.61282 | 0.33972 | 0.25238 |
| 0.73308 | 0.35114 | 0.36775 |
| 0.60619 | 0.40795 | 0.19841 |
| 0.64102 | 0.37597 | 0.25673 |
| 0.70180 | 0.38153 | 0.31287 |
| 0.35122 | 0.62330 | 0.75506 |
| 0.35660 | 0.37770 | 0.25792 |
| 0.29425 | 0.38266 | 0.30925 |
| 0.74703 | 0.24946 | 0.37739 |
| 0.24952 | 0.74978 | 0.37737 |
| 0.25291 | 0.24949 | 0.62240 |
| 0.75035 | 0.74980 | 0.62226 |
| 0.25060 | 0.75016 | 0.62274 |
| 0.75402 | 0.25097 | 0.62317 |
| 0.74918 | 0.75009 | 0.37689 |
| 0.24591 | 0.25093 | 0.37661 |
| 0.29148 | 0.61809 | 0.69506 |
| 0.76635 | 0.78350 | 0.43640 |
| 0.22965 | 0.21739 | 0.43689 |
| 0.20237 | 0.18501 | 0.36965 |
| 0.14198 | 0.19018 | 0.31054 |
| 0.11095 | 0.15984 | 0.25531 |
| 0.23236 | 0.14910 | 0.36700 |
| 0.10427 | 0.09146 | 0.20260 |
| 0.13940 | 0.12365 | 0.25951 |
| 0.20075 | 0.11846 | 0.31392 |
| 0.79190 | 0.81610 | 0.36682 |
| 0.83520 | 0.46561 | 0.86657 |
| 0.78723 | 0.35578 | 0.60004 |
| 0.56611 | 0.33818 | 0.78664 |
| 0.62169 | 0.28345 | 0.68325 |
| 0.73172 | 0.58972 | 0.30603 |
| 0.23290 | 0.91011 | 0.69788 |
| 0.28799 | 0.85505 | 0.59726 |
| 0.07090 | 0.83826 | 0.79914 |
| 0.12274 | 0.78358 | 0.68948 |
| 0.78596 | 0.64449 | 0.40780 |
| 0.27615 | 0.41006 | 0.68694 |
| 0.21851 | 0.35509 | 0.58995 |
| 0.43397 | 0.33623 | 0.79443 |
| 0.57338 | 0.66237 | 0.19380 |
| 0.37930 | 0.28147 | 0.68941 |
| 0.74491 | 0.24918 | 0.27971 |
| 0.62435 | 0.71700 | 0.30477 |
| 0.76994 | 0.91013 | 0.69279 |
| 0.71515 | 0.85574 | 0.58990 |
| 0.92638 | 0.83644 | 0.80733 |
| 0.87462 | 0.78214 | 0.69626 |
| 0.24942 | 0.74974 | 0.27960 |
| 0.73341 | 0.58986 | 0.69578 |
| 0.78766 | 0.64477 | 0.59442 |
| 0.57297 | 0.66189 | 0.80420 |
| 0.62397 | 0.71652 | 0.69302 |
| 0.23149 | 0.08987 | 0.69368 |
| 0.28769 | 0.14517 | 0.59696 |
| 0.06939 | 0.16160 | 0.79511 |
| 0.12196 | 0.21648 | 0.68721 |
| 0.72372 | 0.40999 | 0.31232 |
| 0.78144 | 0.35508 | 0.40945 |



|         |         |         |
|---------|---------|---------|
| 0.56590 | 0.33608 | 0.20525 |
| 0.62065 | 0.28136 | 0.31041 |
| 0.22971 | 0.91012 | 0.30681 |
| 0.28461 | 0.85573 | 0.40952 |
| 0.07322 | 0.83642 | 0.19249 |
| 0.12509 | 0.78212 | 0.30339 |
| 0.26641 | 0.58986 | 0.30406 |
| 0.21217 | 0.64481 | 0.40519 |
| 0.42710 | 0.66178 | 0.19610 |
| 0.37612 | 0.71648 | 0.30694 |
| 0.75050 | 0.74979 | 0.72004 |
| 0.76843 | 0.08977 | 0.30699 |
| 0.71239 | 0.14507 | 0.40375 |
| 0.93009 | 0.16159 | 0.20365 |
| 0.87762 | 0.21650 | 0.31148 |
| 0.25505 | 0.24921 | 0.72007 |
| 0.22309 | 0.09011 | 0.31330 |
| 0.28119 | 0.14539 | 0.40713 |
| 0.06361 | 0.16331 | 0.20948 |
| 0.11876 | 0.21833 | 0.31199 |
| 0.71198 | 0.52243 | 0.14130 |
| 0.57695 | 0.50072 | 0.57183 |
| 0.28785 | 0.52246 | 0.85821 |
| 0.42273 | 0.50092 | 0.42801 |
| 0.49912 | 0.49963 | 0.35815 |
| 0.57988 | 0.47200 | 0.36875 |
| 0.50083 | 0.49998 | 0.64177 |
| 0.41950 | 0.47251 | 0.63077 |
| 0.36036 | 0.44491 | 0.00088 |
| 0.49917 | 0.55409 | 0.25331 |
| 0.50082 | 0.55432 | 0.74713 |
| 0.63943 | 0.44482 | 0.99861 |
| 0.30399 | 0.50070 | 0.00502 |
| 0.29152 | 0.52506 | 0.13751 |
| 0.07884 | 0.02413 | 0.38184 |
| 0.21744 | 0.02136 | 0.86541 |
| 0.19628 | 0.99895 | 0.00977 |
| 0.99307 | 0.00188 | 0.35629 |
| 0.78220 | 0.02124 | 0.13407 |
| 0.80341 | 0.99892 | 0.98954 |
| 0.92117 | 0.02421 | 0.61778 |
| 0.00677 | 0.00191 | 0.64336 |
| 0.13745 | 0.05516 | 0.00783 |
| 0.86230 | 0.05512 | 0.99173 |
| 0.99909 | 0.94455 | 0.25013 |
| 0.00059 | 0.94455 | 0.74942 |
| 0.20825 | 0.97508 | 0.14262 |
| 0.91977 | 0.98882 | 0.41612 |
| 0.79170 | 0.97495 | 0.85686 |
| 0.08011 | 0.98879 | 0.58363 |
| 0.27144 | 0.41090 | 0.30691 |
| 0.21253 | 0.35573 | 0.39962 |
| 0.43353 | 0.33820 | 0.21252 |
| 0.37811 | 0.28346 | 0.31630 |
| 0.75604 | 0.25124 | 0.72085 |
| 0.76654 | 0.91005 | 0.30136 |
| 0.71151 | 0.85499 | 0.40208 |
| 0.92857 | 0.83828 | 0.20002 |
| 0.87676 | 0.78358 | 0.30971 |
| 0.25068 | 0.75022 | 0.72051 |
| 0.26871 | 0.58984 | 0.69443 |
| 0.21445 | 0.64443 | 0.59169 |
| 0.42622 | 0.66292 | 0.80782 |
| 0.37526 | 0.71734 | 0.69611 |
| 0.74899 | 0.75014 | 0.27911 |
| 0.77648 | 0.09021 | 0.68689 |
| 0.71854 | 0.14558 | 0.59325 |
| 0.93637 | 0.16324 | 0.79019 |
| 0.88138 | 0.21830 | 0.68759 |
| 0.24395 | 0.25120 | 0.27893 |
| 0.72820 | 0.41094 | 0.69250 |
| 0.80989 | 0.51106 | 0.62194 |
| 0.79618 | 0.55995 | 0.68027 |
| 0.87835 | 0.53676 | 0.69783 |
| 0.93367 | 0.50793 | 1.01567 |
| 0.86509 | 0.48599 | 1.10254 |
| 0.92983 | 0.51420 | 1.18045 |
| 0.89093 | 0.57367 | 1.07149 |
| 0.84249 | 0.55318 | 1.27244 |
| 0.77750 | 0.52585 | 1.19244 |
| 0.78047 | 0.57858 | 1.17972 |
| 0.73644 | 0.38721 | 1.00923 |
| 0.71508 | 0.46859 | 1.06524 |
| 0.78163 | 0.42653 | 0.85164 |
| 0.82369 | 0.45016 | 0.94038 |
| 0.83863 | 0.40732 | 0.92184 |
| 0.83047 | 0.39752 | 1.13800 |
| 0.81257 | 0.43983 | 1.15972 |

|         |         |         |
|---------|---------|---------|
| 0.76663 | 0.40796 | 1.20760 |
| 0.43564 | 0.40003 | 0.12380 |
| 0.93784 | 0.10069 | 0.87574 |
| 0.36825 | 0.55739 | 0.79042 |
| 0.56731 | 0.59990 | 0.88155 |
| 0.13011 | 0.05659 | 0.78233 |
| 0.06650 | 0.09976 | 0.87938 |
| 0.63163 | 0.55663 | 0.78722 |
| 0.43527 | 0.39882 | 0.88057 |
| 0.86949 | 0.94233 | 0.78778 |
| 0.93123 | 0.89993 | 0.11534 |
| 0.37785 | 0.44367 | 0.23008 |
| 0.93392 | 0.89910 | 0.88162 |
| 0.37964 | 0.44190 | 0.76927 |
| 0.43290 | 0.59987 | 0.11917 |
| 0.86956 | 0.05651 | 0.21741 |
| 0.93316 | 0.09968 | 0.12025 |
| 0.36835 | 0.55659 | 0.21301 |
| 0.87149 | 0.94329 | 0.21906 |
| 0.56448 | 0.39869 | 0.11900 |
| 0.13032 | 0.94229 | 0.21157 |
| 0.06575 | 0.89906 | 0.11808 |
| 0.62030 | 0.44176 | 0.23008 |
| 0.19179 | 0.99950 | 0.11330 |
| 0.93897 | 0.00229 | 0.34824 |
| 0.69226 | 0.49929 | 0.10882 |
| 0.44430 | 0.50264 | 0.35014 |
| 0.80604 | 0.99913 | 0.10385 |
| 0.06181 | 0.00026 | 0.34923 |
| 0.30759 | 0.50048 | 0.10872 |
| 0.56583 | 0.49787 | 0.34844 |
| 0.80792 | 0.99945 | 0.88606 |
| 0.06090 | 0.00236 | 0.65132 |
| 0.30769 | 0.49940 | 0.89092 |
| 0.55549 | 0.50290 | 0.64970 |
| 0.19370 | 0.99920 | 0.89554 |
| 0.93811 | 0.00033 | 0.65046 |
| 0.43376 | 0.49830 | 0.65162 |
| 0.99984 | 0.96083 | 0.17994 |
| 0.50002 | 0.47036 | 0.13265 |
| 0.99728 | 0.02918 | 0.13391 |
| 0.50121 | 0.53879 | 0.18095 |
| 0.99992 | 0.96081 | 0.81966 |
| 0.49981 | 0.47046 | 0.86722 |
| 0.00249 | 0.02921 | 0.86585 |
| 0.49879 | 0.53894 | 0.81931 |
| 0.07351 | 0.97067 | 0.00022 |
| 0.60001 | 0.46076 | 0.99974 |
| 0.90131 | 0.03893 | 0.99313 |
| 0.42757 | 0.52877 | 0.00149 |
| 0.92630 | 0.97069 | 0.99921 |
| 0.39980 | 0.46084 | 0.99995 |
| 0.09844 | 0.03895 | 0.00659 |
| 0.57233 | 0.52871 | 0.99872 |
| 0.56769 | 0.60033 | 0.11636 |
| 0.11877 | 0.05767 | 0.23400 |
| 0.06198 | 0.10069 | 0.12402 |
| 0.63190 | 0.55705 | 0.21050 |
| 0.56411 | 0.40007 | 0.87572 |
| 0.12810 | 0.94327 | 0.78066 |
| 0.06835 | 0.89988 | 0.88424 |
| 0.62179 | 0.44371 | 0.76923 |
| 0.43262 | 0.60063 | 0.88438 |
| 0.88098 | 0.05768 | 0.76580 |
| 0.70557 | 0.50321 | 0.84017 |
| 0.81659 | 0.54331 | 0.96699 |
| 0.70299 | 0.44176 | 1.03054 |
| 0.79540 | 0.51137 | 0.84272 |
| 0.90980 | 0.99962 | 0.15469 |
| 0.91423 | 0.00011 | 0.83768 |
| 0.41135 | 0.49982 | 0.84178 |
| 0.41349 | 0.49959 | 0.15904 |
| 0.49988 | 0.43046 | 0.99978 |
| 0.99988 | 0.06900 | 0.99985 |
| 0.58852 | 0.49963 | 0.15818 |
| 0.08555 | 0.00010 | 0.16194 |
| 0.50003 | 0.56898 | 0.00024 |
| 0.08995 | 0.99965 | 0.84490 |
| 0.58639 | 0.49964 | 0.84093 |
| 0.99989 | 0.93065 | 0.99977 |

## POSCAR file for gb\_p5

POSCAR file from zrtepb-gb-ipa-c.res: C: 143 F: 1 H: 120 O: 66 P: 1 ZR: 12  
 34.89200000000000  
 0.5792995890490465 -0.0000450140396845 0.0007649282407427  
 -0.0000781726227076 1.0082675674799713 0.0000166934211398

0.0004256087542374 0.0000053656439079 0.3214078049098053  
143 1 120 66 1 12

Direct

|         |         |          |
|---------|---------|----------|
| 0.79232 | 0.88298 | 0.30252  |
| 0.23260 | 0.21733 | 0.56319  |
| 0.73117 | 0.71851 | 0.43343  |
| 0.70696 | 0.68608 | 0.36158  |
| 0.64600 | 0.69007 | 0.30381  |
| 0.61807 | 0.65976 | 0.24314  |
| 0.85501 | 0.81246 | 0.31266  |
| 0.74048 | 0.65137 | 0.35210  |
| 0.61579 | 0.59194 | 0.18331  |
| 0.64954 | 0.62439 | 0.24234  |
| 0.71118 | 0.62038 | 0.29641  |
| 0.88497 | 0.84233 | 0.25293  |
| 0.20599 | 0.18481 | 0.63217  |
| 0.23450 | 0.78394 | 0.56318  |
| 0.20830 | 0.81658 | 0.63200  |
| 0.14595 | 0.81225 | 0.68504  |
| 0.11631 | 0.84233 | 0.74449  |
| 0.24116 | 0.85139 | 0.64328  |
| 0.11282 | 0.90962 | 0.80770  |
| 0.14778 | 0.87762 | 0.74898  |
| 0.21064 | 0.88202 | 0.69929  |
| 0.76169 | 0.85265 | 0.35956  |
| 0.73106 | 0.28284 | 0.56310  |
| 0.14324 | 0.18856 | 0.68405  |
| 0.70300 | 0.31566 | 0.62928  |
| 0.63525 | 0.31465 | 0.65556  |
| 0.60445 | 0.34555 | 0.70850  |
| 0.88923 | 0.90970 | 0.19061  |
| 0.73928 | 0.34824 | 0.65803  |
| 0.60558 | 0.41112 | 0.78883  |
| 0.64014 | 0.37886 | 0.72987  |
| 0.70764 | 0.38021 | 0.70399  |
| 0.85438 | 0.87792 | 0.25021  |
| 0.77437 | 0.21816 | 0.56230  |
| 0.11378 | 0.15805 | 0.74169  |
| 0.80317 | 0.18604 | 0.62803  |
| 0.86216 | 0.19113 | 0.69134  |
| 0.89220 | 0.16049 | 0.74676  |
| 0.77380 | 0.14996 | 0.62524  |
| 0.89734 | 0.09195 | 0.79810  |
| 0.86408 | 0.12428 | 0.73849  |
| 0.80436 | 0.11910 | 0.67862  |
| 0.23926 | 0.15010 | 0.64252  |
| 0.11175 | 0.09053 | 0.80458  |
| 0.14571 | 0.12287 | 0.74541  |
| 0.20884 | 0.11908 | 0.69636  |
| 0.72782 | 0.71855 | 0.55939  |
| 0.70121 | 0.68609 | 0.62725  |
| 0.26950 | 0.71725 | 0.56492  |
| 0.64650 | 0.69187 | 0.70236  |
| 0.61748 | 0.66166 | 0.76228  |
| 0.72679 | 0.64926 | 0.61630  |
| 0.60884 | 0.59243 | 0.80694  |
| 0.64148 | 0.62478 | 0.74554  |
| 0.69599 | 0.61880 | 0.67164  |
| 0.76405 | 0.78502 | 0.56242  |
| 0.78989 | 0.81715 | 0.63341  |
| 0.84756 | 0.81109 | 0.69986  |
| 0.87738 | 0.84077 | 0.76077  |
| 0.29466 | 0.68492 | 0.63530  |
| 0.76133 | 0.85339 | 0.63373  |
| 0.88656 | 0.90908 | 0.81272  |
| 0.79937 | 0.53986 | 0.74966  |
| 0.85062 | 0.87732 | 0.75470  |
| 0.90395 | 0.51392 | 0.03666  |
| 0.84789 | 0.54175 | 0.01907  |
| 0.83007 | 0.56345 | 0.13065  |
| 0.79193 | 0.88339 | 0.69228  |
| 0.77967 | 0.44105 | -0.00527 |
| 0.81193 | 0.41858 | 0.89522  |
| 0.27294 | 0.28277 | 0.56070  |
| 0.82845 | 0.45270 | 0.09069  |
| 0.30042 | 0.31519 | 0.62728  |
| 0.35809 | 0.30987 | 0.69438  |
| 0.38766 | 0.34031 | 0.75162  |
| 0.27187 | 0.35148 | 0.62281  |
| 0.39409 | 0.40882 | 0.80147  |
| 0.35216 | 0.69020 | 0.70303  |
| 0.36055 | 0.37672 | 0.74145  |
| 0.26926 | 0.28322 | 0.43496  |
| 0.30208 | 0.38219 | 0.67789  |
| 0.76639 | 0.21624 | 0.43734  |
| 0.79325 | 0.18368 | 0.36874  |
| 0.85717 | 0.18728 | 0.32167  |
| 0.29724 | 0.31549 | 0.36642  |

|         |         |         |
|---------|---------|---------|
| 0.88709 | 0.15702 | 0.26364 |
| 0.75929 | 0.14937 | 0.35362 |
| 0.88899 | 0.09003 | 0.19580 |
| 0.38034 | 0.66010 | 0.76431 |
| 0.85438 | 0.12215 | 0.25521 |
| 0.79019 | 0.11850 | 0.29974 |
| 0.36107 | 0.31134 | 0.31934 |
| 0.26760 | 0.71658 | 0.43896 |
| 0.29343 | 0.68398 | 0.36966 |
| 0.35439 | 0.68863 | 0.31167 |
| 0.38357 | 0.65857 | 0.25151 |
| 0.26135 | 0.64881 | 0.36180 |
| 0.38803 | 0.59087 | 0.19184 |
| 0.35302 | 0.62294 | 0.25028 |
| 0.26461 | 0.64901 | 0.63536 |
| 0.29137 | 0.61829 | 0.30454 |
| 0.39230 | 0.34162 | 0.26343 |
| 0.23252 | 0.78323 | 0.43721 |
| 0.20710 | 0.81552 | 0.36706 |
| 0.15034 | 0.80991 | 0.29754 |
| 0.12169 | 0.83998 | 0.23685 |
| 0.23598 | 0.85173 | 0.36951 |
| 0.26468 | 0.35028 | 0.35282 |
| 0.11433 | 0.90849 | 0.18591 |
| 0.14893 | 0.87642 | 0.24510 |
| 0.38558 | 0.59176 | 0.81871 |
| 0.20681 | 0.88203 | 0.31034 |
| 0.39637 | 0.40918 | 0.20045 |
| 0.72308 | 0.28088 | 0.43804 |
| 0.69456 | 0.31278 | 0.37196 |
| 0.64253 | 0.30647 | 0.29170 |
| 0.61271 | 0.33679 | 0.23434 |
| 0.71732 | 0.35001 | 0.39036 |
| 0.60254 | 0.40620 | 0.19563 |
| 0.63376 | 0.37387 | 0.25848 |
| 0.68619 | 0.38042 | 0.33671 |
| 0.35189 | 0.62392 | 0.75839 |
| 0.36110 | 0.37695 | 0.25760 |
| 0.29690 | 0.38117 | 0.30154 |
| 0.74076 | 0.24760 | 0.37771 |
| 0.24919 | 0.74952 | 0.37842 |
| 0.25468 | 0.24977 | 0.62204 |
| 0.74450 | 0.75180 | 0.62058 |
| 0.25304 | 0.75101 | 0.62368 |
| 0.75714 | 0.25156 | 0.62265 |
| 0.74999 | 0.75184 | 0.37528 |
| 0.24689 | 0.25082 | 0.37613 |
| 0.29331 | 0.61864 | 0.69493 |
| 0.76638 | 0.78507 | 0.43660 |
| 0.22864 | 0.21783 | 0.43752 |
| 0.20069 | 0.18540 | 0.37146 |
| 0.14107 | 0.19043 | 0.30994 |
| 0.11080 | 0.15991 | 0.25420 |
| 0.23044 | 0.14942 | 0.37186 |
| 0.10526 | 0.09151 | 0.20190 |
| 0.13918 | 0.12374 | 0.26069 |
| 0.19953 | 0.11861 | 0.31852 |
| 0.79354 | 0.81744 | 0.36850 |
| 0.82173 | 0.48043 | 0.80159 |
| 0.79260 | 0.34896 | 0.64002 |
| 0.55198 | 0.34464 | 0.73278 |
| 0.60681 | 0.28911 | 0.63320 |
| 0.73516 | 0.59248 | 0.29535 |
| 0.23508 | 0.90973 | 0.70571 |
| 0.29124 | 0.85452 | 0.60721 |
| 0.06775 | 0.83933 | 0.78683 |
| 0.12041 | 0.78489 | 0.67707 |
| 0.78997 | 0.64860 | 0.39047 |
| 0.28089 | 0.41079 | 0.67310 |
| 0.22522 | 0.35541 | 0.57532 |
| 0.43267 | 0.33679 | 0.80454 |
| 0.57061 | 0.66245 | 0.19724 |
| 0.38034 | 0.28149 | 0.69834 |
| 0.73621 | 0.24663 | 0.28037 |
| 0.62012 | 0.71736 | 0.30922 |
| 0.77111 | 0.91210 | 0.68919 |
| 0.71476 | 0.85814 | 0.58670 |
| 0.92271 | 0.83653 | 0.81223 |
| 0.86980 | 0.78268 | 0.70034 |
| 0.24850 | 0.74910 | 0.28062 |
| 0.71269 | 0.58962 | 0.65694 |
| 0.77123 | 0.64453 | 0.56293 |
| 0.57493 | 0.66576 | 0.82142 |
| 0.62600 | 0.72058 | 0.71079 |
| 0.23361 | 0.09143 | 0.70069 |
| 0.28944 | 0.14736 | 0.60660 |
| 0.06497 | 0.16057 | 0.78346 |
| 0.11726 | 0.21579 | 0.67676 |

|         |         |          |
|---------|---------|----------|
| 0.70258 | 0.40971 | 0.35115  |
| 0.76022 | 0.35477 | 0.44735  |
| 0.57245 | 0.33268 | 0.17054  |
| 0.62474 | 0.27739 | 0.27765  |
| 0.22806 | 0.91062 | 0.31499  |
| 0.28194 | 0.85607 | 0.41879  |
| 0.07689 | 0.83618 | 0.18367  |
| 0.12778 | 0.78160 | 0.29488  |
| 0.26759 | 0.59034 | 0.30198  |
| 0.21228 | 0.64534 | 0.40174  |
| 0.43123 | 0.66175 | 0.20611  |
| 0.37932 | 0.71623 | 0.31669  |
| 0.74282 | 0.75167 | 0.71834  |
| 0.76496 | 0.09107 | 0.29208  |
| 0.70844 | 0.14671 | 0.38643  |
| 0.93676 | 0.15948 | 0.22532  |
| 0.88357 | 0.21425 | 0.33266  |
| 0.25693 | 0.24968 | 0.71972  |
| 0.22158 | 0.09019 | 0.32015  |
| 0.27855 | 0.14577 | 0.41471  |
| 0.06429 | 0.16322 | 0.20561  |
| 0.11800 | 0.21861 | 0.30910  |
| 0.71642 | 0.51698 | 0.15677  |
| 0.57559 | 0.49691 | 0.57760  |
| 0.28636 | 0.52211 | 0.86371  |
| 0.42011 | 0.49825 | 0.42013  |
| 0.51093 | 0.49816 | 0.35733  |
| 0.57826 | 0.46942 | 0.36005  |
| 0.49449 | 0.50065 | 0.64446  |
| 0.42036 | 0.47257 | 0.63541  |
| 0.36274 | 0.44470 | 0.00239  |
| 0.50220 | 0.55357 | 0.25503  |
| 0.50018 | 0.55460 | 0.74754  |
| 0.64662 | 0.44776 | 0.99442  |
| 0.30501 | 0.50072 | 0.01647  |
| 0.29611 | 0.52595 | 0.14384  |
| 0.08099 | 0.02482 | 0.37785  |
| 0.21723 | 0.02195 | 0.86286  |
| 0.19731 | 0.99908 | 0.00288  |
| 0.99646 | 0.00192 | 0.35554  |
| 0.78423 | 0.02140 | 0.13532  |
| 0.80458 | 0.99919 | 0.99586  |
| 0.92211 | 0.02549 | 0.62067  |
| 0.00578 | 0.00219 | 0.64315  |
| 0.13856 | 0.05523 | 0.00625  |
| 0.86320 | 0.05525 | 0.99305  |
| 0.00121 | 0.94457 | 0.24961  |
| 0.00047 | 0.94477 | 0.74874  |
| 0.21123 | 0.97572 | 0.13918  |
| 0.92249 | 0.99079 | 0.41892  |
| 0.79044 | 0.97668 | 0.85730  |
| 0.08003 | 0.99062 | 0.58068  |
| 0.27285 | 0.40898 | 0.29455  |
| 0.21370 | 0.35329 | 0.38465  |
| 0.44187 | 0.33869 | 0.22490  |
| 0.38642 | 0.28399 | 0.32895  |
| 0.76209 | 0.25251 | 0.71993  |
| 0.76882 | 0.91097 | 0.29715  |
| 0.71224 | 0.85617 | 0.39781  |
| 0.93303 | 0.83903 | 0.20898  |
| 0.87968 | 0.78481 | 0.31931  |
| 0.25384 | 0.75145 | 0.72145  |
| 0.27113 | 0.59026 | 0.69229  |
| 0.21790 | 0.64502 | 0.58805  |
| 0.42566 | 0.66370 | 0.81629  |
| 0.37554 | 0.71831 | 0.70416  |
| 0.75194 | 0.75206 | 0.27754  |
| 0.78252 | 0.09063 | 0.67574  |
| 0.72611 | 0.14640 | 0.58088  |
| 0.93833 | 0.16373 | 0.79656  |
| 0.88501 | 0.21937 | 0.69377  |
| 0.24469 | 0.25085 | 0.27848  |
| 0.73507 | 0.40643 | 0.72198  |
| 0.78257 | 0.53024 | 0.66126  |
| 0.77856 | 0.56823 | 0.76763  |
| 0.85379 | 0.54091 | 0.75115  |
| 0.91498 | 0.49769 | -0.04502 |
| 0.89152 | 0.49360 | 0.10825  |
| 0.94904 | 0.52946 | 0.06273  |
| 0.85972 | 0.56205 | -0.05344 |
| 0.87221 | 0.58095 | 0.15999  |
| 0.81765 | 0.54343 | 0.20318  |
| 0.78740 | 0.58228 | 0.11521  |
| 0.74146 | 0.42252 | 0.03704  |
| 0.71181 | 0.47118 | 0.11478  |
| 0.77471 | 0.40948 | 0.82957  |
| 0.84909 | 0.43632 | 0.84893  |
| 0.83648 | 0.39299 | -0.06928 |

|         |          |          |
|---------|----------|----------|
| 0.84671 | 0.42760  | 0.13960  |
| 0.87147 | 0.46728  | 0.05047  |
| 0.80504 | 0.47222  | 0.15532  |
| 0.44008 | 0.39987  | 0.12385  |
| 0.93798 | 0.10111  | 0.87954  |
| 0.36781 | 0.55791  | 0.79381  |
| 0.56421 | 0.60160  | 0.88169  |
| 0.13045 | 0.05674  | 0.78061  |
| 0.06612 | 0.09970  | 0.87729  |
| 0.62683 | 0.55877  | 0.78126  |
| 0.43554 | 0.39957  | 0.88150  |
| 0.86957 | 0.94311  | 0.78804  |
| 0.93365 | 0.90000  | 0.11601  |
| 0.38059 | 0.44290  | 0.22992  |
| 0.93351 | 0.89955  | 0.88175  |
| 0.37959 | 0.44268  | 0.77091  |
| 0.43580 | 0.60023  | 0.12392  |
| 0.87034 | 0.05616  | 0.21888  |
| 0.93487 | 0.09949  | 0.12418  |
| 0.36981 | 0.55694  | 0.21432  |
| 0.87379 | 0.94364  | 0.21877  |
| 0.56761 | 0.39737  | 0.10578  |
| 0.13205 | 0.94240  | 0.21026  |
| 0.06765 | 0.89922  | 0.11596  |
| 0.61401 | 0.43956  | 0.23304  |
| 0.19314 | 0.99969  | 0.10952  |
| 0.94204 | 0.00245  | 0.34808  |
| 0.69359 | 0.49277  | 0.16689  |
| 0.44477 | 0.50274  | 0.34669  |
| 0.80714 | 0.99894  | 0.10525  |
| 0.06454 | 0.00042  | 0.34815  |
| 0.30912 | 0.50062  | 0.11597  |
| 0.56583 | 0.49629  | 0.35018  |
| 0.80893 | 0.00038  | 0.88825  |
| 0.06038 | 0.00263  | 0.65081  |
| 0.30793 | 0.49957  | 0.89624  |
| 0.55338 | 0.50440  | 0.65128  |
| 0.19452 | 0.99936  | 0.89239  |
| 0.93808 | 0.00098  | 0.65032  |
| 0.43362 | 0.49870  | 0.65431  |
| 0.00187 | 0.96087  | 0.17944  |
| 0.50288 | 0.47023  | 0.13129  |
| 0.99910 | 0.02916  | 0.13395  |
| 0.50460 | 0.53886  | 0.18144  |
| 0.00001 | 0.96111  | 0.81880  |
| 0.50029 | 0.47160  | 0.86613  |
| 0.00280 | 0.02937  | 0.86584  |
| 0.49786 | 0.53970  | 0.82076  |
| 0.07436 | 0.97079  | -0.00138 |
| 0.60389 | 0.46227  | 0.99440  |
| 0.90224 | 0.03908  | 0.99474  |
| 0.42924 | 0.52900  | 0.00486  |
| 0.92743 | 0.97087  | -0.00027 |
| 0.40153 | 0.46114  | 0.00195  |
| 0.09956 | 0.03902  | 0.00475  |
| 0.57697 | 0.53027  | 0.99628  |
| 0.56839 | 0.60123  | 0.11495  |
| 0.12019 | 0.05772  | 0.23256  |
| 0.06353 | 0.10074  | 0.12224  |
| 0.63505 | 0.55824  | 0.20525  |
| 0.56310 | 0.40110  | 0.86626  |
| 0.12836 | 0.94354  | 0.77976  |
| 0.06792 | 0.89999  | 0.88162  |
| 0.62053 | 0.44496  | 0.76010  |
| 0.43134 | 0.60095  | 0.89069  |
| 0.88274 | 0.05823  | 0.76619  |
| 0.69720 | 0.49894  | 0.84769  |
| 0.78737 | 0.52161  | 0.98536  |
| 0.74804 | 0.47326  | -0.05499 |
| 0.76820 | 0.50742  | 0.85778  |
| 0.91209 | -0.00038 | 0.15565  |
| 0.91416 | 0.00026  | 0.83861  |
| 0.41042 | 0.50070  | 0.84645  |
| 0.41652 | 0.49919  | 0.16402  |
| 0.50208 | 0.43111  | -0.00312 |
| 0.00087 | 0.06898  | 0.00023  |
| 0.59145 | 0.49999  | 0.15383  |
| 0.08783 | -0.00005 | 0.15997  |
| 0.50097 | 0.56940  | 0.00192  |
| 0.08984 | -0.00019 | 0.84294  |
| 0.58572 | 0.50068  | 0.83742  |
| 0.00085 | 0.93073  | -0.00131 |

## POSCAR file for gb\_p5\_prime

POSCAR file from zrtepb-gb-ipa-c.res: C: 143 F: 1 H: 120 O: 66 P: 1 ZR: 12  
34.8920000000000

|                     |                     |                    |
|---------------------|---------------------|--------------------|
| 0.5792995890490465  | -0.0000450140396845 | 0.0007649282407427 |
| -0.0000781726227076 | 1.0082675674799713  | 0.0000166934211398 |
| 0.0004256087542374  | 0.0000053656439079  | 0.3214078049098053 |

143 1 120 66 1 12

Direct

|         |         |          |
|---------|---------|----------|
| 0.79248 | 0.88304 | 0.30286  |
| 0.23343 | 0.21728 | 0.56203  |
| 0.73130 | 0.71855 | 0.43352  |
| 0.70660 | 0.68606 | 0.36234  |
| 0.64434 | 0.68969 | 0.30907  |
| 0.61621 | 0.65942 | 0.24849  |
| 0.85521 | 0.81245 | 0.31070  |
| 0.74101 | 0.65179 | 0.34911  |
| 0.61448 | 0.59209 | 0.18477  |
| 0.64888 | 0.62445 | 0.24308  |
| 0.71173 | 0.62087 | 0.29286  |
| 0.88490 | 0.84246 | 0.25123  |
| 0.20674 | 0.18474 | 0.63096  |
| 0.23439 | 0.78429 | 0.56228  |
| 0.20811 | 0.81694 | 0.63101  |
| 0.14499 | 0.81289 | 0.68124  |
| 0.11538 | 0.84293 | 0.74085  |
| 0.24171 | 0.85143 | 0.64511  |
| 0.11279 | 0.90994 | 0.80704  |
| 0.14766 | 0.87796 | 0.74804  |
| 0.21120 | 0.88209 | 0.70093  |
| 0.76219 | 0.85262 | 0.35996  |
| 0.73038 | 0.28362 | 0.55960  |
| 0.14341 | 0.18835 | 0.68060  |
| 0.70215 | 0.31682 | 0.62387  |
| 0.63484 | 0.31565 | 0.65370  |
| 0.60448 | 0.34667 | 0.70694  |
| 0.88897 | 0.90994 | 0.18993  |
| 0.73807 | 0.34993 | 0.64809  |
| 0.60635 | 0.41244 | 0.78688  |
| 0.63993 | 0.38027 | 0.72528  |
| 0.70673 | 0.38199 | 0.69429  |
| 0.85430 | 0.87807 | 0.24955  |
| 0.77321 | 0.21871 | 0.56179  |
| 0.11387 | 0.15794 | 0.73859  |
| 0.80177 | 0.18662 | 0.62842  |
| 0.85973 | 0.19199 | 0.69462  |
| 0.89024 | 0.16142 | 0.74972  |
| 0.77391 | 0.15015 | 0.62260  |
| 0.89742 | 0.09257 | 0.79751  |
| 0.86368 | 0.12488 | 0.73852  |
| 0.80493 | 0.11938 | 0.67576  |
| 0.24054 | 0.15027 | 0.64387  |
| 0.11232 | 0.09070 | 0.80430  |
| 0.14637 | 0.12294 | 0.74480  |
| 0.21005 | 0.11929 | 0.69789  |
| 0.72725 | 0.71889 | 0.55937  |
| 0.70058 | 0.68666 | 0.62799  |
| 0.26897 | 0.71758 | 0.56449  |
| 0.64633 | 0.69303 | 0.70372  |
| 0.61704 | 0.66314 | 0.76456  |
| 0.72631 | 0.64977 | 0.61889  |
| 0.60703 | 0.59410 | 0.80965  |
| 0.64108 | 0.62618 | 0.74967  |
| 0.69626 | 0.61968 | 0.67756  |
| 0.76385 | 0.78527 | 0.56182  |
| 0.78962 | 0.81741 | 0.63285  |
| 0.84706 | 0.81129 | 0.69995  |
| 0.87690 | 0.84097 | 0.76076  |
| 0.29370 | 0.68518 | 0.63495  |
| 0.76124 | 0.85370 | 0.63279  |
| 0.88653 | 0.90937 | 0.81183  |
| 0.84032 | 0.47762 | 0.77790  |
| 0.85045 | 0.87761 | 0.75404  |
| 0.90263 | 0.57134 | -0.10434 |
| 0.84974 | 0.55945 | -0.19213 |
| 0.81912 | 0.59279 | -0.25726 |
| 0.79190 | 0.88371 | 0.69120  |
| 0.85758 | 0.50442 | 0.10175  |
| 0.90360 | 0.47079 | 1.08522  |
| 0.27388 | 0.28267 | 0.56002  |
| 0.89321 | 0.54167 | 0.07875  |
| 0.30104 | 0.31507 | 0.62683  |
| 0.35726 | 0.30950 | 0.69759  |
| 0.38685 | 0.33998 | 0.75455  |
| 0.27348 | 0.35156 | 0.61905  |
| 0.39476 | 0.40882 | 0.79973  |
| 0.35093 | 0.69032 | 0.70347  |
| 0.36098 | 0.37659 | 0.74077  |
| 0.27015 | 0.28330 | 0.43434  |
| 0.30358 | 0.38225 | 0.67431  |
| 0.76692 | 0.21672 | 0.43656  |
| 0.79421 | 0.18397 | 0.36929  |

|         |         |         |
|---------|---------|---------|
| 0.85919 | 0.18695 | 0.32678 |
| 0.29832 | 0.31563 | 0.36614 |
| 0.88899 | 0.15664 | 0.26884 |
| 0.75930 | 0.15016 | 0.35037 |
| 0.88922 | 0.09023 | 0.19565 |
| 0.37854 | 0.66013 | 0.76506 |
| 0.85508 | 0.12228 | 0.25608 |
| 0.79003 | 0.11916 | 0.29686 |
| 0.36332 | 0.31215 | 0.32408 |
| 0.26665 | 0.71674 | 0.43865 |
| 0.29223 | 0.68390 | 0.37013 |
| 0.35390 | 0.68804 | 0.31436 |
| 0.38296 | 0.65770 | 0.25551 |
| 0.25942 | 0.64898 | 0.36175 |
| 0.38643 | 0.59022 | 0.19484 |
| 0.35164 | 0.62229 | 0.25375 |
| 0.26339 | 0.64935 | 0.63419 |
| 0.28941 | 0.61812 | 0.30618 |
| 0.39429 | 0.34239 | 0.26750 |
| 0.23200 | 0.78344 | 0.43646 |
| 0.20680 | 0.81573 | 0.36624 |
| 0.15125 | 0.80996 | 0.29381 |
| 0.12270 | 0.84005 | 0.23314 |
| 0.23478 | 0.85215 | 0.37146 |
| 0.26454 | 0.34983 | 0.34783 |
| 0.11413 | 0.90874 | 0.18544 |
| 0.14888 | 0.87668 | 0.24422 |
| 0.38340 | 0.59187 | 0.81913 |
| 0.20574 | 0.88247 | 0.31220 |
| 0.39630 | 0.40933 | 0.19768 |
| 0.72483 | 0.28165 | 0.43419 |
| 0.69822 | 0.31374 | 0.36568 |
| 0.64450 | 0.30796 | 0.28896 |
| 0.61573 | 0.33847 | 0.23081 |
| 0.72446 | 0.35048 | 0.37786 |
| 0.60658 | 0.40761 | 0.19021 |
| 0.63988 | 0.37526 | 0.24946 |
| 0.69497 | 0.38117 | 0.32181 |
| 0.34984 | 0.62402 | 0.75853 |
| 0.36158 | 0.37715 | 0.25640 |
| 0.29645 | 0.38079 | 0.29618 |
| 0.74278 | 0.24816 | 0.37528 |
| 0.24831 | 0.74963 | 0.37777 |
| 0.25557 | 0.24965 | 0.62120 |
| 0.74381 | 0.75224 | 0.62022 |
| 0.25303 | 0.75146 | 0.62312 |
| 0.75506 | 0.25223 | 0.62083 |
| 0.75102 | 0.75163 | 0.37502 |
| 0.24741 | 0.25103 | 0.37523 |
| 0.29161 | 0.61887 | 0.69396 |
| 0.76706 | 0.78501 | 0.43600 |
| 0.22924 | 0.21798 | 0.43644 |
| 0.20126 | 0.18558 | 0.37040 |
| 0.14232 | 0.19078 | 0.30696 |
| 0.11191 | 0.16024 | 0.25166 |
| 0.23030 | 0.14942 | 0.37300 |
| 0.10540 | 0.09169 | 0.20178 |
| 0.13951 | 0.12390 | 0.26027 |
| 0.19928 | 0.11861 | 0.31992 |
| 0.79405 | 0.81736 | 0.36779 |
| 0.75629 | 0.45198 | 0.88458 |
| 0.79110 | 0.35086 | 0.62772 |
| 0.55250 | 0.34559 | 0.73440 |
| 0.60639 | 0.28987 | 0.63443 |
| 0.73711 | 0.59343 | 0.28795 |
| 0.23612 | 0.90960 | 0.70929 |
| 0.29229 | 0.85427 | 0.61119 |
| 0.06628 | 0.84015 | 0.78127 |
| 0.11894 | 0.78578 | 0.67115 |
| 0.79113 | 0.64923 | 0.38500 |
| 0.28321 | 0.41100 | 0.66747 |
| 0.22771 | 0.35564 | 0.56906 |
| 0.43097 | 0.33635 | 0.80975 |
| 0.56770 | 0.66186 | 0.20613 |
| 0.37850 | 0.28093 | 0.70441 |
| 0.73960 | 0.24710 | 0.27776 |
| 0.61758 | 0.71663 | 0.31785 |
| 0.77126 | 0.91245 | 0.68766 |
| 0.71472 | 0.85847 | 0.58565 |
| 0.92207 | 0.83668 | 0.81260 |
| 0.86909 | 0.78283 | 0.70103 |
| 0.24742 | 0.74911 | 0.28001 |
| 0.71449 | 0.59054 | 0.66787 |
| 0.77054 | 0.64478 | 0.56507 |
| 0.57427 | 0.66751 | 0.82298 |
| 0.62628 | 0.72187 | 0.71142 |
| 0.23522 | 0.09181 | 0.70405 |
| 0.29109 | 0.14766 | 0.60963 |



|         |         |          |
|---------|---------|----------|
| 0.06462 | 0.16037 | 0.77861  |
| 0.11707 | 0.21540 | 0.67136  |
| 0.71385 | 0.41013 | 0.33294  |
| 0.76844 | 0.35473 | 0.43263  |
| 0.57342 | 0.33479 | 0.17122  |
| 0.62430 | 0.27925 | 0.27865  |
| 0.22622 | 0.91119 | 0.31901  |
| 0.27990 | 0.85662 | 0.42304  |
| 0.07869 | 0.83615 | 0.17788  |
| 0.12943 | 0.78148 | 0.28893  |
| 0.26497 | 0.59036 | 0.30322  |
| 0.20982 | 0.64596 | 0.39987  |
| 0.43102 | 0.66051 | 0.21127  |
| 0.37940 | 0.71547 | 0.31987  |
| 0.74165 | 0.75223 | 0.71794  |
| 0.76388 | 0.09212 | 0.28612  |
| 0.70776 | 0.14800 | 0.37996  |
| 0.93942 | 0.15867 | 0.23363  |
| 0.88640 | 0.21350 | 0.34089  |
| 0.25771 | 0.24951 | 0.71888  |
| 0.22079 | 0.09006 | 0.32320  |
| 0.27792 | 0.14565 | 0.41743  |
| 0.06581 | 0.16365 | 0.20183  |
| 0.11982 | 0.21911 | 0.30440  |
| 0.71420 | 0.52308 | 0.14891  |
| 0.57527 | 0.50089 | 0.57164  |
| 0.28793 | 0.52351 | 0.86387  |
| 0.42419 | 0.50150 | 0.42914  |
| 0.49953 | 0.49844 | 0.35807  |
| 0.58300 | 0.47212 | 0.36571  |
| 0.50024 | 0.50174 | 0.64146  |
| 0.41751 | 0.47386 | 0.63196  |
| 0.36230 | 0.44483 | -0.00040 |
| 0.50044 | 0.55396 | 0.25532  |
| 0.49916 | 0.55615 | 0.74888  |
| 0.64823 | 0.45217 | 0.98583  |
| 0.30432 | 0.50073 | 0.00117  |
| 0.29152 | 0.52419 | 0.14223  |
| 0.08025 | 0.02496 | 0.37822  |
| 0.21769 | 0.02188 | 0.86294  |
| 0.19733 | 0.99924 | 0.00370  |
| 0.99577 | 0.00209 | 0.35512  |
| 0.78410 | 0.02160 | 0.13441  |
| 0.80466 | 0.99960 | 0.99409  |
| 0.92228 | 0.02594 | 0.62025  |
| 0.00621 | 0.00258 | 0.64279  |
| 0.13866 | 0.05542 | 0.00623  |
| 0.86345 | 0.05569 | 0.99235  |
| 0.00089 | 0.94491 | 0.24921  |
| 0.00061 | 0.94515 | 0.74814  |
| 0.21075 | 0.97571 | 0.13934  |
| 0.92176 | 0.99118 | 0.41847  |
| 0.79091 | 0.97694 | 0.85616  |
| 0.08007 | 0.99067 | 0.58065  |
| 0.27134 | 0.40815 | 0.28548  |
| 0.21287 | 0.35236 | 0.37636  |
| 0.44471 | 0.33989 | 0.23251  |
| 0.38970 | 0.28529 | 0.33761  |
| 0.75852 | 0.25332 | 0.71832  |
| 0.76887 | 0.91101 | 0.29823  |
| 0.71288 | 0.85602 | 0.39890  |
| 0.93280 | 0.83926 | 0.20664  |
| 0.87986 | 0.78478 | 0.31624  |
| 0.25410 | 0.75201 | 0.72086  |
| 0.26929 | 0.59053 | 0.69044  |
| 0.21693 | 0.64550 | 0.58606  |
| 0.42369 | 0.66352 | 0.81762  |
| 0.37461 | 0.71833 | 0.70487  |
| 0.75346 | 0.75163 | 0.27733  |
| 0.78419 | 0.09068 | 0.67027  |
| 0.72712 | 0.14615 | 0.57561  |
| 0.93565 | 0.16498 | 0.80147  |
| 0.88159 | 0.22046 | 0.69937  |
| 0.24511 | 0.25120 | 0.27757  |
| 0.73403 | 0.40849 | 0.70871  |
| 0.83508 | 0.44649 | 0.77977  |
| 0.83058 | 0.48704 | 0.68582  |
| 0.89141 | 0.48493 | 0.80360  |
| 0.92212 | 0.54661 | 0.94480  |
| 0.88217 | 0.59170 | -0.03916 |
| 0.94416 | 0.58517 | -0.15120 |
| 0.87074 | 0.53947 | 0.74220  |
| 0.85739 | 0.60908 | -0.30538 |
| 0.79471 | 0.61213 | -0.19326 |
| 0.78245 | 0.58311 | -0.32345 |
| 0.84143 | 0.50438 | 0.19640  |
| 0.71695 | 0.48096 | 0.08431  |
| 0.87763 | 0.44364 | 1.09846  |

0.92671 0.47064 0.99614  
0.94332 0.47269 0.15237  
0.93429 0.54431 0.14295  
0.91417 0.54252 -0.01199  
0.85999 0.56623 0.09050  
0.43980 0.40002 0.12095  
0.93820 0.10167 0.87892  
0.36575 0.55799 0.79426  
0.56281 0.60322 0.88568  
0.13096 0.05687 0.78061  
0.06667 0.09995 0.87685  
0.62316 0.56052 0.78054  
0.43675 0.39971 0.87889  
0.86972 0.94341 0.78704  
0.93341 0.90026 0.11528  
0.37989 0.44306 0.22624  
0.93346 0.89981 0.88093  
0.37989 0.44262 0.76904  
0.43290 0.59980 0.12462  
0.87027 0.05635 0.21786  
0.93510 0.09974 0.12399  
0.36913 0.55616 0.21878  
0.87348 0.94385 0.21805  
0.56736 0.39871 0.10654  
0.13161 0.94266 0.21037  
0.06750 0.89949 0.11528  
0.61926 0.44114 0.22591  
0.19299 0.99979 0.10989  
0.94141 0.00263 0.34743  
0.69607 0.49733 0.15293  
0.44520 0.50063 0.35062  
0.80717 0.99926 0.10392  
0.06390 0.00061 0.34797  
0.30891 0.50019 0.11134  
0.56716 0.49775 0.34650  
0.80910 0.00075 0.88692  
0.06063 0.00298 0.65046  
0.30682 0.49984 0.89427  
0.55378 0.50524 0.64856  
0.19460 0.99946 0.89279  
0.93814 0.00139 0.64972  
0.43139 0.49977 0.65224  
0.00156 0.96112 0.17886  
0.50121 0.47064 0.13013  
0.99899 0.02945 0.13327  
0.50162 0.53888 0.18249  
0.00010 0.96144 0.81828  
0.50099 0.47238 0.86533  
0.00304 0.02973 0.86543  
0.49697 0.54061 0.82072  
0.07430 0.97101 0.99841  
0.60339 0.46330 0.99602  
0.90241 0.03946 0.99381  
0.42760 0.52918 0.00340  
0.92736 0.97115 0.99885  
0.40111 0.46126 0.99846  
0.09961 0.03925 0.00469  
0.57437 0.53110 0.99881  
0.56568 0.60129 0.11973  
0.12005 0.05787 0.23276  
0.06375 0.10093 0.12197  
0.63425 0.55829 0.20475  
0.56431 0.40214 0.86515  
0.12844 0.94386 0.77931  
0.06786 0.90028 0.88084  
0.62163 0.44640 0.76058  
0.42914 0.60114 0.89095  
0.88317 0.05881 0.76529  
0.70792 0.50630 0.83079  
0.79690 0.54123 0.87325  
0.79490 0.50113 1.03906  
0.77655 0.49649 0.87894  
0.91188 -0.00007 0.15477  
0.91440 0.00070 0.83773  
0.41169 0.50065 0.84225  
0.41334 0.49945 0.15936  
0.50242 0.43153 0.99431  
0.00102 0.06940 0.99974  
0.58726 0.50022 0.15676  
0.08755 0.00020 0.15994  
0.49913 0.57001 0.00247  
0.09006 0.00008 0.84295  
0.58783 0.50248 0.83952  
0.00073 0.93099 0.99806

POSCAR file for gb\_product

POSCAR file from zrtepb-gb-ipa-c.res: C: 143 F: 1 H: 120 O: 66 P: 1 ZR: 12  
34.8920000000000

0.5792995890490465 -0.0000450140396845 0.0007649282407427  
-0.0000781726227076 1.0082675674799713 0.0000166934211398  
0.0004256087542374 0.0000053656439079 0.3214078049098053

143 1 120 66 1 12

Direct

0.79431 0.88551 0.30413  
0.23451 0.21858 0.56273  
0.72689 0.72270 0.43056  
0.70188 0.69089 0.35701  
0.63473 0.69122 0.32765  
0.60681 0.66074 0.26809  
0.85676 0.81480 0.31451  
0.74129 0.66026 0.32078  
0.61067 0.59568 0.18872  
0.64511 0.62875 0.24180  
0.71268 0.62874 0.26672  
0.88656 0.84448 0.25375  
0.20707 0.18616 0.63150  
0.23254 0.78387 0.56175  
0.20653 0.81673 0.63009  
0.14228 0.81372 0.67612  
0.11333 0.84403 0.73543  
0.24176 0.85050 0.64804  
0.11333 0.91060 0.80580  
0.14742 0.87840 0.74644  
0.21199 0.88152 0.70331  
0.76384 0.85539 0.36221  
0.73051 0.28429 0.56029  
0.14226 0.18892 0.67505  
0.70369 0.31791 0.62376  
0.63493 0.32088 0.63726  
0.60700 0.35265 0.69034  
0.89030 0.91159 0.18959  
0.74378 0.34764 0.66407  
0.61574 0.41570 0.78771  
0.64717 0.38306 0.72481  
0.71555 0.38049 0.71087  
0.85596 0.88007 0.25081  
0.77444 0.21978 0.56279  
0.11277 0.15837 0.73248  
0.80284 0.18777 0.62969  
0.85842 0.19358 0.70185  
0.88898 0.16307 0.75717  
0.77690 0.15095 0.61880  
0.89897 0.09392 0.79839  
0.86475 0.12621 0.74038  
0.80797 0.12028 0.67231  
0.24207 0.15230 0.64913  
0.11326 0.09168 0.80376  
0.14684 0.12400 0.74382  
0.21176 0.12112 0.70228  
0.71943 0.72273 0.55583  
0.69165 0.69026 0.62135  
0.26787 0.71727 0.56444  
0.64636 0.69654 0.71446  
0.61958 0.66627 0.77722  
0.70905 0.65275 0.59314  
0.60888 0.59665 0.81420  
0.63685 0.62902 0.74668  
0.68087 0.62245 0.65312  
0.76092 0.78805 0.56268  
0.78726 0.81970 0.63504  
0.84461 0.81303 0.70179  
0.87541 0.84250 0.76202  
0.29356 0.68497 0.63453  
0.75966 0.85619 0.63527  
0.88698 0.91089 0.81202  
0.81721 0.45825 0.80436  
0.84987 0.87935 0.75526  
0.90905 0.56489 0.82953  
0.84748 0.54297 0.79375  
0.79632 0.56853 0.73773  
0.79121 0.88595 0.69331  
0.80691 0.46046 0.13398  
0.86682 0.44000 0.08495  
0.27787 0.28341 0.55938  
0.82375 0.49428 0.21180  
0.30628 0.31585 0.62501  
0.36137 0.30996 0.69837  
0.39239 0.34042 0.75332  
0.28126 0.35280 0.61277  
0.40447 0.40965 0.79096  
0.35098 0.69041 0.70224  
0.36923 0.37741 0.73472  
0.27470 0.28356 0.43368  
0.31283 0.38344 0.66575

|         |         |         |
|---------|---------|---------|
| 0.76766 | 0.21757 | 0.43762 |
| 0.79554 | 0.18486 | 0.37076 |
| 0.86217 | 0.18674 | 0.33681 |
| 0.30320 | 0.31549 | 0.36386 |
| 0.89199 | 0.15647 | 0.27856 |
| 0.75922 | 0.15212 | 0.34397 |
| 0.89028 | 0.09112 | 0.19653 |
| 0.37979 | 0.66030 | 0.76248 |
| 0.85634 | 0.12311 | 0.25774 |
| 0.78985 | 0.12101 | 0.29086 |
| 0.36891 | 0.31247 | 0.32516 |
| 0.26571 | 0.71639 | 0.43870 |
| 0.29117 | 0.68339 | 0.37047 |
| 0.35343 | 0.68702 | 0.31653 |
| 0.38195 | 0.65659 | 0.25725 |
| 0.25747 | 0.64876 | 0.36007 |
| 0.38406 | 0.58953 | 0.19242 |
| 0.34962 | 0.62146 | 0.25314 |
| 0.26434 | 0.64885 | 0.63313 |
| 0.28692 | 0.61775 | 0.30417 |
| 0.39931 | 0.34235 | 0.26560 |
| 0.23056 | 0.78306 | 0.43598 |
| 0.20586 | 0.81555 | 0.36567 |
| 0.15143 | 0.81003 | 0.29036 |
| 0.12363 | 0.84033 | 0.22939 |
| 0.23341 | 0.85203 | 0.37358 |
| 0.26820 | 0.34889 | 0.33928 |
| 0.11497 | 0.90929 | 0.18467 |
| 0.14919 | 0.87701 | 0.24337 |
| 0.38736 | 0.59199 | 0.81373 |
| 0.20495 | 0.88258 | 0.31447 |
| 0.39923 | 0.40859 | 0.18799 |
| 0.72415 | 0.28210 | 0.43510 |
| 0.69814 | 0.31450 | 0.36740 |
| 0.64575 | 0.30916 | 0.28758 |
| 0.61797 | 0.34003 | 0.22980 |
| 0.72400 | 0.35117 | 0.38379 |
| 0.60947 | 0.40922 | 0.19247 |
| 0.64184 | 0.37667 | 0.25194 |
| 0.69557 | 0.38218 | 0.32779 |
| 0.35233 | 0.62389 | 0.75479 |
| 0.36519 | 0.37638 | 0.24793 |
| 0.29937 | 0.37954 | 0.28455 |
| 0.74241 | 0.24869 | 0.37614 |
| 0.24729 | 0.74927 | 0.37754 |
| 0.25773 | 0.25087 | 0.62127 |
| 0.73763 | 0.75537 | 0.61898 |
| 0.25126 | 0.75107 | 0.62289 |
| 0.75623 | 0.25327 | 0.62175 |
| 0.75097 | 0.75509 | 0.37427 |
| 0.25098 | 0.25136 | 0.37524 |
| 0.29395 | 0.61838 | 0.69090 |
| 0.76704 | 0.78801 | 0.43739 |
| 0.23100 | 0.21882 | 0.43715 |
| 0.20247 | 0.18634 | 0.37182 |
| 0.14448 | 0.19167 | 0.30577 |
| 0.11417 | 0.16115 | 0.25002 |
| 0.23047 | 0.14994 | 0.37727 |
| 0.10680 | 0.09247 | 0.20214 |
| 0.14072 | 0.12463 | 0.26121 |
| 0.19942 | 0.11914 | 0.32408 |
| 0.79560 | 0.82015 | 0.37097 |
| 0.67260 | 0.42254 | 0.96858 |
| 0.79765 | 0.34542 | 0.65472 |
| 0.55358 | 0.35440 | 0.70603 |
| 0.60343 | 0.29760 | 0.60599 |
| 0.74253 | 0.60377 | 0.24405 |
| 0.23837 | 0.90847 | 0.71442 |
| 0.29308 | 0.85253 | 0.61723 |
| 0.06337 | 0.84195 | 0.77273 |
| 0.11485 | 0.78719 | 0.66313 |
| 0.79434 | 0.66047 | 0.34087 |
| 0.29439 | 0.41249 | 0.65481 |
| 0.23650 | 0.35739 | 0.56025 |
| 0.43560 | 0.33632 | 0.81053 |
| 0.55448 | 0.66059 | 0.24344 |
| 0.38066 | 0.28106 | 0.70924 |
| 0.73919 | 0.24757 | 0.27863 |
| 0.60440 | 0.71560 | 0.35419 |
| 0.77130 | 0.91486 | 0.68991 |
| 0.71315 | 0.86128 | 0.58842 |
| 0.92068 | 0.83787 | 0.81331 |
| 0.86587 | 0.78438 | 0.70274 |
| 0.24664 | 0.74872 | 0.27977 |
| 0.69290 | 0.59313 | 0.62947 |
| 0.74553 | 0.64730 | 0.52340 |
| 0.58454 | 0.67068 | 0.85047 |
| 0.63157 | 0.72572 | 0.73594 |

|         |         |         |
|---------|---------|---------|
| 0.23810 | 0.09410 | 0.71206 |
| 0.29349 | 0.15031 | 0.61883 |
| 0.06239 | 0.16023 | 0.76803 |
| 0.11478 | 0.21541 | 0.66175 |
| 0.71425 | 0.41108 | 0.34130 |
| 0.76667 | 0.35509 | 0.44216 |
| 0.57670 | 0.33674 | 0.16765 |
| 0.62569 | 0.28052 | 0.27454 |
| 0.22511 | 0.91131 | 0.32375 |
| 0.27767 | 0.85643 | 0.42757 |
| 0.08063 | 0.83647 | 0.17155 |
| 0.12991 | 0.78154 | 0.28296 |
| 0.26149 | 0.59030 | 0.29948 |
| 0.20748 | 0.64611 | 0.39688 |
| 0.43028 | 0.65914 | 0.21379 |
| 0.37972 | 0.71416 | 0.32346 |
| 0.73445 | 0.75504 | 0.71658 |
| 0.76234 | 0.09473 | 0.27424 |
| 0.70666 | 0.15079 | 0.36775 |
| 0.94368 | 0.15782 | 0.24954 |
| 0.89057 | 0.21243 | 0.35735 |
| 0.25941 | 0.25099 | 0.71900 |
| 0.22024 | 0.09047 | 0.32949 |
| 0.27730 | 0.14593 | 0.42412 |
| 0.06900 | 0.16477 | 0.19761 |
| 0.12268 | 0.22014 | 0.30085 |
| 0.69906 | 0.53133 | 0.21145 |
| 0.58882 | 0.49788 | 0.58410 |
| 0.29642 | 0.52417 | 0.85170 |
| 0.42162 | 0.50794 | 0.41958 |
| 0.49629 | 0.49765 | 0.35601 |
| 0.58057 | 0.47319 | 0.36781 |
| 0.51288 | 0.50452 | 0.64306 |
| 0.43070 | 0.47659 | 0.62070 |
| 0.36821 | 0.44446 | 0.98857 |
| 0.49905 | 0.55444 | 0.25512 |
| 0.50591 | 0.55810 | 0.75039 |
| 0.65385 | 0.45273 | 0.99029 |
| 0.30842 | 0.50019 | 0.98250 |
| 0.29117 | 0.52231 | 0.13202 |
| 0.08222 | 0.02576 | 0.37762 |
| 0.21901 | 0.02252 | 0.86222 |
| 0.19856 | 0.99973 | 0.00432 |
| 0.99725 | 0.00322 | 0.35478 |
| 0.78476 | 0.02242 | 0.13328 |
| 0.80586 | 0.00100 | 0.99425 |
| 0.92376 | 0.02719 | 0.61957 |
| 0.00756 | 0.00366 | 0.64220 |
| 0.14012 | 0.05631 | 0.00620 |
| 0.86483 | 0.05699 | 0.99222 |
| 0.00247 | 0.94584 | 0.24858 |
| 0.00163 | 0.94634 | 0.74731 |
| 0.21167 | 0.97589 | 0.13822 |
| 0.92330 | 0.99219 | 0.41752 |
| 0.79171 | 0.97909 | 0.85361 |
| 0.08143 | 0.99155 | 0.58030 |
| 0.27323 | 0.40636 | 0.26917 |
| 0.21611 | 0.35104 | 0.36569 |
| 0.45040 | 0.34016 | 0.23366 |
| 0.39633 | 0.28627 | 0.34366 |
| 0.76002 | 0.25453 | 0.71918 |
| 0.77094 | 0.91351 | 0.29812 |
| 0.71444 | 0.85889 | 0.40062 |
| 0.93435 | 0.84104 | 0.20898 |
| 0.88104 | 0.78704 | 0.32097 |
| 0.25226 | 0.75168 | 0.72064 |
| 0.27245 | 0.58985 | 0.68633 |
| 0.21779 | 0.64469 | 0.58548 |
| 0.42503 | 0.66402 | 0.81457 |
| 0.37386 | 0.71865 | 0.70426 |
| 0.75592 | 0.75522 | 0.27691 |
| 0.78883 | 0.09132 | 0.66290 |
| 0.73172 | 0.14659 | 0.56723 |
| 0.93268 | 0.16694 | 0.81326 |
| 0.87853 | 0.22236 | 0.71102 |
| 0.24917 | 0.25124 | 0.27754 |
| 0.74627 | 0.40419 | 0.74037 |
| 0.81965 | 0.42911 | 0.83899 |
| 0.78962 | 0.45800 | 0.71959 |
| 0.86728 | 0.46930 | 0.78801 |
| 0.94628 | 0.54625 | 0.87130 |
| 0.89583 | 0.58752 | 0.89357 |
| 0.93188 | 0.57848 | 0.75087 |
| 0.86224 | 0.52084 | 0.72799 |
| 0.81525 | 0.58086 | 0.65376 |
| 0.78377 | 0.59208 | 0.79881 |
| 0.75032 | 0.55277 | 0.72023 |
| 0.77769 | 0.44012 | 0.18805 |

|         |         |         |
|---------|---------|---------|
| 0.72928 | 0.49519 | 0.13657 |
| 0.85169 | 0.41603 | 0.02788 |
| 0.89836 | 0.45954 | 1.03309 |
| 0.89647 | 0.42860 | 0.15919 |
| 0.84749 | 0.48392 | 0.29415 |
| 0.85732 | 0.51403 | 0.16591 |
| 0.77872 | 0.51003 | 0.23738 |
| 0.44426 | 0.39973 | 0.11360 |
| 0.93959 | 0.10290 | 0.88022 |
| 0.37188 | 0.55789 | 0.78678 |
| 0.56558 | 0.60503 | 0.89261 |
| 0.13194 | 0.05788 | 0.78018 |
| 0.06788 | 0.10094 | 0.87691 |
| 0.62902 | 0.56335 | 0.78945 |
| 0.44698 | 0.40073 | 0.86957 |
| 0.87073 | 0.94497 | 0.78691 |
| 0.93419 | 0.90171 | 0.11434 |
| 0.38064 | 0.44213 | 0.21415 |
| 0.93403 | 0.90109 | 0.88048 |
| 0.39035 | 0.44349 | 0.75918 |
| 0.42942 | 0.59948 | 0.12050 |
| 0.87090 | 0.05724 | 0.21756 |
| 0.93638 | 0.10066 | 0.12550 |
| 0.36776 | 0.55527 | 0.21643 |
| 0.87495 | 0.94557 | 0.21727 |
| 0.57251 | 0.40057 | 0.10520 |
| 0.13274 | 0.94318 | 0.20955 |
| 0.06822 | 0.90034 | 0.11430 |
| 0.62007 | 0.44260 | 0.23122 |
| 0.19444 | 0.00015 | 0.10909 |
| 0.94301 | 0.00398 | 0.34708 |
| 0.69551 | 0.50354 | 0.19898 |
| 0.44172 | 0.49789 | 0.34691 |
| 0.80823 | 0.00030 | 0.10222 |
| 0.06555 | 0.00145 | 0.34761 |
| 0.31127 | 0.49921 | 0.09993 |
| 0.56363 | 0.49853 | 0.34786 |
| 0.81059 | 0.00257 | 0.88545 |
| 0.06197 | 0.00392 | 0.64998 |
| 0.31279 | 0.49976 | 0.88139 |
| 0.56604 | 0.50850 | 0.65323 |
| 0.19552 | 0.00020 | 0.89181 |
| 0.93950 | 0.00264 | 0.64929 |
| 0.44355 | 0.50192 | 0.64860 |
| 0.00288 | 0.96215 | 0.17845 |
| 0.50303 | 0.47112 | 0.12926 |
| 0.00045 | 0.03042 | 0.13319 |
| 0.50048 | 0.53944 | 0.18216 |
| 0.00124 | 0.96255 | 0.81767 |
| 0.50991 | 0.47441 | 0.86565 |
| 0.00452 | 0.03083 | 0.86567 |
| 0.50409 | 0.54204 | 0.82117 |
| 0.07546 | 0.97196 | 0.99783 |
| 0.61071 | 0.46643 | 0.00211 |
| 0.90375 | 0.04072 | 0.99380 |
| 0.43045 | 0.52937 | 0.99878 |
| 0.92878 | 0.97246 | 0.99833 |
| 0.40648 | 0.46129 | 0.98980 |
| 0.10106 | 0.04014 | 0.00454 |
| 0.57788 | 0.53329 | 0.00435 |
| 0.56072 | 0.60390 | 0.12559 |
| 0.12148 | 0.05858 | 0.23246 |
| 0.06511 | 0.10172 | 0.12236 |
| 0.63062 | 0.56219 | 0.21236 |
| 0.57469 | 0.40527 | 0.86724 |
| 0.12947 | 0.94447 | 0.77859 |
| 0.06830 | 0.90110 | 0.87973 |
| 0.63050 | 0.44968 | 0.76104 |
| 0.43232 | 0.60157 | 0.88677 |
| 0.88534 | 0.06022 | 0.76501 |
| 0.70522 | 0.50657 | 0.86963 |
| 0.82247 | 0.52517 | 0.89906 |
| 0.75988 | 0.46918 | 0.03961 |
| 0.77083 | 0.48824 | 0.90703 |
| 0.91321 | 0.00117 | 0.15432 |
| 0.91563 | 0.00207 | 0.83722 |
| 0.42000 | 0.50106 | 0.83570 |
| 0.41327 | 0.49922 | 0.15343 |
| 0.50853 | 0.43278 | 0.99187 |
| 0.00247 | 0.07054 | 0.00001 |
| 0.58718 | 0.50140 | 0.16093 |
| 0.08898 | 0.00101 | 0.15969 |
| 0.50015 | 0.57100 | 0.00306 |
| 0.09146 | 0.00104 | 0.84237 |
| 0.59753 | 0.50517 | 0.84621 |
| 0.00185 | 0.93202 | 0.99734 |

## POSCAR file for gd\_solvent

POSCAR file from zrtepb-gd-ipa-c.res: C: 146 F: 1 H: 126 O: 66 P: 1 ZR: 12  
34.8920000000000

0.5792995890490465 -0.0000450140396845 0.0007649282407427  
-0.0000781726227076 1.0082675674799713 0.0000166934211398  
0.0004256087542374 0.0000053656439079 0.3214078049098053

146 1 126 66 1 12

Direct

0.79241 0.88298 0.30290  
0.64952 0.62447 0.24179  
0.26482 0.64901 0.63477  
0.29124 0.61833 0.30453  
0.39247 0.34179 0.26470  
0.23242 0.78321 0.43733  
0.20708 0.81548 0.36708  
0.15063 0.80981 0.29681  
0.12204 0.83987 0.23604  
0.23584 0.85172 0.37002  
0.26436 0.35018 0.35218  
0.11443 0.90843 0.18580  
0.71167 0.62073 0.29409  
0.14906 0.87636 0.24489  
0.38548 0.59173 0.81864  
0.20673 0.88201 0.31073  
0.39607 0.40922 0.20029  
0.72287 0.28067 0.43843  
0.69441 0.31262 0.37241  
0.64249 0.30637 0.29188  
0.61255 0.33674 0.23496  
0.71712 0.34986 0.39112  
0.60234 0.40619 0.19633  
0.88497 0.84232 0.25296  
0.63353 0.37382 0.25932  
0.68605 0.38029 0.33747  
0.35188 0.62387 0.75810  
0.36088 0.37701 0.25771  
0.29646 0.38109 0.30070  
0.74092 0.24747 0.37796  
0.24910 0.74950 0.37849  
0.25484 0.24970 0.62228  
0.74414 0.75177 0.62062  
0.25322 0.75105 0.62382  
0.20628 0.18472 0.63220  
0.75696 0.25138 0.62302  
0.75012 0.75187 0.37543  
0.24684 0.25086 0.37636  
0.29349 0.61859 0.69414  
0.76651 0.78507 0.43693  
0.22872 0.21783 0.43764  
0.20078 0.18540 0.37159  
0.14129 0.19045 0.30966  
0.11104 0.15992 0.25402  
0.23042 0.14940 0.37249  
0.23449 0.78393 0.56323  
0.10539 0.09147 0.20219  
0.13929 0.12372 0.26099  
0.19951 0.11858 0.31925  
0.79369 0.81745 0.36894  
0.20821 0.81656 0.63199  
0.14565 0.81232 0.68428  
0.11602 0.84241 0.74362  
0.24129 0.85127 0.64389  
0.11285 0.90964 0.80754  
0.23283 0.21726 0.56326  
0.14773 0.87763 0.74871  
0.21078 0.88193 0.69970  
0.76184 0.85266 0.36010  
0.73065 0.28259 0.56355  
0.14340 0.18844 0.68354  
0.70250 0.31539 0.62969  
0.63451 0.31479 0.65399  
0.60392 0.34578 0.70685  
0.88923 0.90969 0.19058  
0.73920 0.34764 0.66043  
0.73099 0.71857 0.43334  
0.60562 0.41111 0.78904  
0.64010 0.37877 0.73020  
0.70784 0.37972 0.70631  
0.85440 0.87791 0.25031  
0.77450 0.21805 0.56255  
0.89835 0.48395 1.13566  
0.96479 0.53684 1.07502  
0.92483 0.49814 0.91235  
0.11389 0.15794 0.74114  
0.80337 0.18595 0.62825  
0.86207 0.19116 0.69236

|         |         |         |
|---------|---------|---------|
| 0.89218 | 0.16055 | 0.74785 |
| 0.77437 | 0.14977 | 0.62459 |
| 0.70676 | 0.68618 | 0.36127 |
| 0.89771 | 0.09196 | 0.79834 |
| 0.86442 | 0.12426 | 0.73881 |
| 0.80502 | 0.11895 | 0.67804 |
| 0.23968 | 0.15008 | 0.64305 |
| 0.11202 | 0.09047 | 0.80462 |
| 0.14596 | 0.12280 | 0.74533 |
| 0.20921 | 0.11904 | 0.69677 |
| 0.72743 | 0.71856 | 0.55926 |
| 0.70089 | 0.68608 | 0.62709 |
| 0.26964 | 0.71729 | 0.56499 |
| 0.64528 | 0.68996 | 0.30521 |
| 0.64694 | 0.69192 | 0.70391 |
| 0.61811 | 0.66171 | 0.76407 |
| 0.72599 | 0.64918 | 0.61484 |
| 0.60884 | 0.59246 | 0.80755 |
| 0.64158 | 0.62477 | 0.74616 |
| 0.69542 | 0.61873 | 0.67071 |
| 0.76394 | 0.78497 | 0.56273 |
| 0.78978 | 0.81705 | 0.63391 |
| 0.84736 | 0.81099 | 0.70061 |
| 0.87718 | 0.84070 | 0.76132 |
| 0.61745 | 0.65966 | 0.24429 |
| 0.29485 | 0.68494 | 0.63519 |
| 0.76131 | 0.85330 | 0.63392 |
| 0.88660 | 0.90906 | 0.81265 |
| 0.79959 | 0.54009 | 0.74860 |
| 0.85058 | 0.87728 | 0.75484 |
| 0.90409 | 0.51364 | 0.03526 |
| 0.84830 | 0.54159 | 0.01735 |
| 0.83064 | 0.56364 | 0.12834 |
| 0.79195 | 0.88333 | 0.69224 |
| 0.75992 | 0.40934 | 0.07813 |
| 0.85509 | 0.81246 | 0.31282 |
| 0.79171 | 0.38548 | 0.98139 |
| 0.27300 | 0.28272 | 0.56101 |
| 0.80911 | 0.42152 | 0.17280 |
| 0.30047 | 0.31512 | 0.62769 |
| 0.35788 | 0.30967 | 0.69541 |
| 0.38756 | 0.34008 | 0.75266 |
| 0.27215 | 0.35146 | 0.62275 |
| 0.39437 | 0.40871 | 0.80148 |
| 0.35231 | 0.69017 | 0.70304 |
| 0.36079 | 0.37656 | 0.74172 |
| 0.74089 | 0.65174 | 0.34983 |
| 0.26926 | 0.28323 | 0.43533 |
| 0.30247 | 0.38212 | 0.67783 |
| 0.76665 | 0.21615 | 0.43755 |
| 0.79365 | 0.18360 | 0.36903 |
| 0.85781 | 0.18706 | 0.32298 |
| 0.29724 | 0.31552 | 0.36683 |
| 0.88762 | 0.15679 | 0.26481 |
| 0.75940 | 0.14943 | 0.35290 |
| 0.88909 | 0.08993 | 0.19573 |
| 0.38036 | 0.66004 | 0.76434 |
| 0.61573 | 0.59195 | 0.18317 |
| 0.85460 | 0.12205 | 0.25531 |
| 0.79021 | 0.11852 | 0.29900 |
| 0.36132 | 0.31152 | 0.32076 |
| 0.26757 | 0.71659 | 0.43910 |
| 0.29338 | 0.68398 | 0.36982 |
| 0.35440 | 0.68862 | 0.31216 |
| 0.38359 | 0.65857 | 0.25197 |
| 0.26118 | 0.64885 | 0.36171 |
| 0.38796 | 0.59092 | 0.19187 |
| 0.35295 | 0.62297 | 0.25049 |
| 0.81098 | 0.47135 | 0.83027 |
| 0.79267 | 0.34802 | 0.64391 |
| 0.55125 | 0.34516 | 0.72979 |
| 0.60572 | 0.28952 | 0.63031 |
| 0.73615 | 0.59299 | 0.29167 |
| 0.23534 | 0.90960 | 0.70654 |
| 0.29150 | 0.85430 | 0.60835 |
| 0.06733 | 0.83950 | 0.78554 |
| 0.11997 | 0.78502 | 0.67593 |
| 0.79073 | 0.64917 | 0.38692 |
| 0.28149 | 0.41077 | 0.67301 |
| 0.22560 | 0.35545 | 0.57502 |
| 0.43238 | 0.33648 | 0.80605 |
| 0.56960 | 0.66223 | 0.19963 |
| 0.37980 | 0.28123 | 0.69992 |
| 0.73652 | 0.24657 | 0.28058 |
| 0.61889 | 0.71707 | 0.31214 |
| 0.77121 | 0.91206 | 0.68874 |
| 0.71480 | 0.85804 | 0.58671 |
| 0.92249 | 0.83648 | 0.81287 |



|         |         |          |
|---------|---------|----------|
| 0.86956 | 0.78257 | 0.70144  |
| 0.24839 | 0.74907 | 0.28073  |
| 0.71167 | 0.58953 | 0.65486  |
| 0.76981 | 0.64440 | 0.55990  |
| 0.57599 | 0.66585 | 0.82415  |
| 0.62682 | 0.72068 | 0.71356  |
| 0.23406 | 0.09143 | 0.70139  |
| 0.28993 | 0.14736 | 0.60749  |
| 0.06498 | 0.16043 | 0.78246  |
| 0.11734 | 0.21563 | 0.67583  |
| 0.70250 | 0.40956 | 0.35206  |
| 0.75992 | 0.35458 | 0.44840  |
| 0.57229 | 0.33267 | 0.17116  |
| 0.62493 | 0.27729 | 0.27707  |
| 0.22784 | 0.91062 | 0.31576  |
| 0.28160 | 0.85607 | 0.41982  |
| 0.07743 | 0.83604 | 0.18229  |
| 0.12824 | 0.78146 | 0.29368  |
| 0.26742 | 0.59039 | 0.30189  |
| 0.21203 | 0.64543 | 0.40134  |
| 0.43129 | 0.66173 | 0.20671  |
| 0.37939 | 0.71621 | 0.31744  |
| 0.74232 | 0.75158 | 0.71837  |
| 0.76471 | 0.09120 | 0.29058  |
| 0.70839 | 0.14689 | 0.38505  |
| 0.93745 | 0.15912 | 0.22709  |
| 0.88451 | 0.21390 | 0.33478  |
| 0.25706 | 0.24959 | 0.71996  |
| 0.22148 | 0.09014 | 0.32127  |
| 0.27840 | 0.14574 | 0.41571  |
| 0.06463 | 0.16323 | 0.20510  |
| 0.11831 | 0.21865 | 0.30840  |
| 0.71579 | 0.51748 | 0.15564  |
| 0.57568 | 0.49651 | 0.57830  |
| 0.28717 | 0.52263 | 0.86264  |
| 0.41964 | 0.49831 | 0.41983  |
| 0.51027 | 0.49825 | 0.35703  |
| 0.57779 | 0.46955 | 0.36060  |
| 0.49466 | 0.50074 | 0.64448  |
| 0.42023 | 0.47263 | 0.63527  |
| 0.36229 | 0.44475 | 0.00205  |
| 0.50181 | 0.55359 | 0.25475  |
| 0.50013 | 0.55491 | 0.74834  |
| 0.64688 | 0.44795 | 0.99411  |
| 0.30474 | 0.50102 | 0.01564  |
| 0.29641 | 0.52649 | 0.14243  |
| 0.08078 | 0.02476 | 0.37827  |
| 0.21747 | 0.02188 | 0.86303  |
| 0.19742 | 0.99904 | 0.00305  |
| 0.99632 | 0.00188 | 0.35556  |
| 0.78424 | 0.02130 | 0.13514  |
| 0.80471 | 0.99923 | 0.99545  |
| 0.92201 | 0.02554 | 0.62087  |
| 0.00589 | 0.00226 | 0.64311  |
| 0.13868 | 0.05523 | 0.00652  |
| 0.86350 | 0.05528 | 0.99310  |
| 0.00135 | 0.94453 | 0.24971  |
| 0.00062 | 0.94481 | 0.74851  |
| 0.21120 | 0.97560 | 0.13922  |
| 0.92230 | 0.99088 | 0.41895  |
| 0.79083 | 0.97664 | 0.85697  |
| 0.07990 | 0.99051 | 0.58067  |
| 0.27213 | 0.40878 | 0.29273  |
| 0.21323 | 0.35307 | 0.38332  |
| 0.44223 | 0.33898 | 0.22699  |
| 0.38691 | 0.28427 | 0.33116  |
| 0.76180 | 0.25229 | 0.72032  |
| 0.76887 | 0.91096 | 0.29754  |
| 0.71241 | 0.85617 | 0.39847  |
| 0.93296 | 0.83902 | 0.20876  |
| 0.87973 | 0.78479 | 0.31923  |
| 0.25414 | 0.75153 | 0.72157  |
| 0.27143 | 0.59019 | 0.69091  |
| 0.21821 | 0.64505 | 0.58719  |
| 0.42562 | 0.66357 | 0.81651  |
| 0.37575 | 0.71825 | 0.70429  |
| 0.75226 | 0.75211 | 0.27773  |
| 0.78349 | 0.09042 | 0.67448  |
| 0.72696 | 0.14610 | 0.57937  |
| 0.93808 | 0.16385 | 0.79830  |
| 0.88469 | 0.21945 | 0.69530  |
| 0.24456 | 0.25098 | 0.27869  |
| 0.73569 | 0.40567 | 0.72599  |
| 0.78236 | 0.53082 | 0.66015  |
| 0.77956 | 0.56860 | 0.76733  |
| 0.85406 | 0.54068 | 0.74949  |
| 0.86028 | 0.56163 | -0.05576 |
| 0.87313 | 0.58090 | 0.15758  |

|         |          |          |
|---------|----------|----------|
| 0.81742 | 0.54391  | 0.20121  |
| 0.78856 | 0.58283  | 0.11199  |
| 0.72131 | 0.39154  | 0.12230  |
| 0.71976 | 0.46268  | 0.08940  |
| 0.75462 | 0.37595  | 0.91613  |
| 0.82970 | 0.40228  | 0.93389  |
| 0.81544 | 0.36011  | 0.02011  |
| 0.82766 | 0.39666  | 0.22247  |
| 0.85177 | 0.43589  | 0.13059  |
| 0.78578 | 0.44137  | 0.23645  |
| 0.95294 | 0.51376  | 0.83902  |
| 0.96732 | 0.47779  | 0.93208  |
| 0.88073 | 0.47922  | 0.89029  |
| 0.88213 | 0.49482  | 1.22688  |
| 0.95219 | 0.47534  | 1.12179  |
| 0.86985 | 0.45648  | 1.15220  |
| 0.97582 | 0.56069  | 1.00910  |
| 0.94679 | 0.53496  | 1.17122  |
| 1.01561 | 0.52311  | 1.08416  |
| 0.43981 | 0.39992  | 0.12393  |
| 0.93834 | 0.10113  | 0.87978  |
| 0.36766 | 0.55789  | 0.79374  |
| 0.56417 | 0.60163  | 0.88217  |
| 0.13064 | 0.05668  | 0.78062  |
| 0.06647 | 0.09967  | 0.87747  |
| 0.62673 | 0.55877  | 0.78180  |
| 0.43572 | 0.39951  | 0.88158  |
| 0.86970 | 0.94308  | 0.78790  |
| 0.93368 | 0.89997  | 0.11607  |
| 0.38011 | 0.44297  | 0.22953  |
| 0.93355 | 0.89954  | 0.88172  |
| 0.37983 | 0.44254  | 0.77056  |
| 0.43566 | 0.60028  | 0.12399  |
| 0.87035 | 0.05608  | 0.21866  |
| 0.93505 | 0.09941  | 0.12426  |
| 0.36969 | 0.55698  | 0.21422  |
| 0.87378 | 0.94362  | 0.21856  |
| 0.56721 | 0.39738  | 0.10680  |
| 0.13207 | 0.94234  | 0.21041  |
| 0.06780 | 0.89917  | 0.11575  |
| 0.61412 | 0.43958  | 0.23331  |
| 0.19318 | 0.99961  | 0.10968  |
| 0.94190 | 0.00244  | 0.34802  |
| 0.69337 | 0.49310  | 0.16470  |
| 0.44437 | 0.50267  | 0.34642  |
| 0.80724 | 0.99892  | 0.10482  |
| 0.06439 | 0.00038  | 0.34828  |
| 0.30883 | 0.50101  | 0.11496  |
| 0.56540 | 0.49639  | 0.35001  |
| 0.80913 | 0.00040  | 0.88783  |
| 0.06042 | 0.00266  | 0.65071  |
| 0.30772 | 0.49973  | 0.89501  |
| 0.55338 | 0.50448  | 0.65136  |
| 0.19467 | 0.99932  | 0.89257  |
| 0.93804 | 0.00101  | 0.65026  |
| 0.43351 | 0.49875  | 0.65417  |
| 0.00195 | 0.96080  | 0.17948  |
| 0.50266 | 0.47025  | 0.13115  |
| 0.99922 | 0.02911  | 0.13404  |
| 0.50430 | 0.53883  | 0.18132  |
| 0.00012 | 0.96109  | 0.81871  |
| 0.50017 | 0.47161  | 0.86631  |
| 0.00302 | 0.02937  | 0.86583  |
| 0.49778 | 0.53975  | 0.82100  |
| 0.07442 | 0.97077  | -0.00134 |
| 0.60384 | 0.46225  | 0.99450  |
| 0.90247 | 0.03905  | 0.99470  |
| 0.42892 | 0.52901  | 0.00465  |
| 0.92755 | 0.97083  | -0.00035 |
| 0.40118 | 0.46111  | 0.00155  |
| 0.09973 | 0.03898  | 0.00493  |
| 0.57661 | 0.53025  | 0.99662  |
| 0.56816 | 0.60116  | 0.11520  |
| 0.12028 | 0.05768  | 0.23289  |
| 0.06370 | 0.10070  | 0.12246  |
| 0.63507 | 0.55827  | 0.20526  |
| 0.56313 | 0.40112  | 0.86647  |
| 0.12843 | 0.94355  | 0.77968  |
| 0.06796 | 0.90000  | 0.88148  |
| 0.62046 | 0.44495  | 0.76006  |
| 0.43118 | 0.60091  | 0.89064  |
| 0.88315 | 0.05826  | 0.76637  |
| 0.69694 | 0.49942  | 0.84712  |
| 0.78773 | 0.52151  | 0.98392  |
| 0.72903 | 0.44133  | 0.02539  |
| 0.76810 | 0.50765  | 0.85617  |
| 0.91215 | -0.00041 | 0.15554  |
| 0.50071 | 0.56940  | 0.00212  |

0.08790 -0.00011 0.16016  
0.59120 0.49999 0.15393  
0.00114 0.06894 0.00040  
0.50207 0.43111 -0.00305  
0.41625 0.49918 0.16359  
0.41029 0.50065 0.84613  
0.91437 0.00025 0.83853  
0.09000 -0.00021 0.84304  
0.58559 0.50073 0.83769  
0.00094 0.93069 -0.00135

## POSCAR file for gd\_p5

POSCAR file from zrtcgb-gd-ipa-c.res: C: 146 F: 1 H: 126 O: 66 P: 1 ZR: 12  
34.8920000000000

0.5792995890490465 -0.0000450140396845 0.0007649282407427  
-0.0000781726227076 1.0082675674799713 0.0000166934211398  
0.0004256087542374 0.0000053656439079 0.3214078049098053

146 1 126 66 1 12

Direct

0.79249 0.88300 0.30315  
0.65043 0.62429 0.24148  
0.26508 0.64905 0.63414  
0.29081 0.61849 0.30345  
0.39341 0.34236 0.26881  
0.23223 0.78328 0.43717  
0.20693 0.81560 0.36707  
0.15136 0.80983 0.29472  
0.12288 0.83991 0.23383  
0.23493 0.85201 0.37219  
0.26390 0.34983 0.35008  
0.11434 0.90856 0.18610  
0.71436 0.62155 0.28712  
0.14905 0.87653 0.24491  
0.38561 0.59190 0.81901  
0.20586 0.88233 0.31298  
0.39585 0.40940 0.20034  
0.71984 0.28011 0.44093  
0.69033 0.31203 0.37621  
0.63960 0.30573 0.29330  
0.60953 0.33612 0.23669  
0.71117 0.34944 0.39853  
0.59946 0.40577 0.19916  
0.88520 0.84247 0.25303  
0.62885 0.37329 0.26428  
0.67946 0.37985 0.34614  
0.35186 0.62401 0.75846  
0.36081 0.37718 0.25835  
0.29575 0.38081 0.29847  
0.73848 0.24714 0.37971  
0.24887 0.74959 0.37827  
0.25537 0.24946 0.62272  
0.74419 0.75178 0.62053  
0.25330 0.75112 0.62352  
0.20685 0.18450 0.63218  
0.75671 0.25116 0.62440  
0.75062 0.75183 0.37541  
0.24718 0.25089 0.37685  
0.29370 0.61866 0.69384  
0.76691 0.78503 0.43697  
0.22918 0.21779 0.43782  
0.20123 0.18536 0.37171  
0.14214 0.19048 0.30870  
0.11185 0.15995 0.25310  
0.23045 0.14926 0.37385  
0.23445 0.78398 0.56296  
0.10562 0.09143 0.20278  
0.13962 0.12366 0.26136  
0.19945 0.11843 0.32080  
0.79408 0.81744 0.36906  
0.20810 0.81661 0.63173  
0.14485 0.81264 0.68142  
0.11521 0.84271 0.74082  
0.24178 0.85106 0.64612  
0.11286 0.90966 0.80767  
0.23338 0.21708 0.56335  
0.14763 0.87770 0.74843  
0.21128 0.88175 0.70177  
0.76205 0.85260 0.36016  
0.72888 0.28208 0.56579  
0.14349 0.18804 0.68170  
0.70123 0.31498 0.63204  
0.63280 0.31566 0.65186  
0.60305 0.34710 0.70349  
0.88915 0.90981 0.19068  
0.73917 0.34651 0.66531  
0.73115 0.71859 0.43336

|         |         |          |
|---------|---------|----------|
| 0.60703 | 0.41187 | 0.78919  |
| 0.64064 | 0.37938 | 0.72953  |
| 0.70876 | 0.37917 | 0.70917  |
| 0.85447 | 0.87802 | 0.25047  |
| 0.77451 | 0.21799 | 0.56327  |
| 0.92017 | 0.55074 | 0.08144  |
| 0.95469 | 0.59638 | -0.07818 |
| 0.94270 | 0.52770 | 0.87497  |
| 0.11400 | 0.15760 | 0.73958  |
| 0.80384 | 0.18590 | 0.62831  |
| 0.86148 | 0.19134 | 0.69527  |
| 0.89164 | 0.16077 | 0.75085  |
| 0.77590 | 0.14948 | 0.62178  |
| 0.70688 | 0.68616 | 0.36132  |
| 0.89827 | 0.09203 | 0.79873  |
| 0.86498 | 0.12429 | 0.73910  |
| 0.80660 | 0.11872 | 0.67539  |
| 0.24074 | 0.15006 | 0.64509  |
| 0.11256 | 0.09041 | 0.80533  |
| 0.14661 | 0.12265 | 0.74587  |
| 0.21032 | 0.11906 | 0.69908  |
| 0.72736 | 0.71861 | 0.55909  |
| 0.70103 | 0.68606 | 0.62686  |
| 0.26971 | 0.71737 | 0.56464  |
| 0.64355 | 0.68898 | 0.31191  |
| 0.64854 | 0.69198 | 0.70678  |
| 0.61996 | 0.66173 | 0.76713  |
| 0.72511 | 0.64903 | 0.61174  |
| 0.60932 | 0.59239 | 0.80752  |
| 0.64234 | 0.62469 | 0.74664  |
| 0.69498 | 0.61860 | 0.66849  |
| 0.76409 | 0.78497 | 0.56264  |
| 0.78979 | 0.81707 | 0.63399  |
| 0.84713 | 0.81098 | 0.70132  |
| 0.87693 | 0.84068 | 0.76211  |
| 0.61604 | 0.65862 | 0.25089  |
| 0.29492 | 0.68501 | 0.63492  |
| 0.76143 | 0.85338 | 0.63376  |
| 0.88663 | 0.90909 | 0.81290  |
| 0.75836 | 0.54313 | 0.74889  |
| 0.85053 | 0.87732 | 0.75520  |
| 0.91499 | 0.56046 | -0.05071 |
| 0.84237 | 0.56712 | -0.08578 |
| 0.80712 | 0.59874 | -0.02039 |
| 0.79204 | 0.88340 | 0.69220  |
| 0.82264 | 0.43802 | -0.01175 |
| 0.85550 | 0.81256 | 0.31301  |
| 0.85032 | 0.41841 | 0.87890  |
| 0.27356 | 0.28252 | 0.56176  |
| 0.87739 | 0.45275 | 0.06815  |
| 0.30098 | 0.31488 | 0.62864  |
| 0.35751 | 0.30927 | 0.69856  |
| 0.38721 | 0.33968 | 0.75580  |
| 0.27343 | 0.35136 | 0.62156  |
| 0.39503 | 0.40850 | 0.80182  |
| 0.35214 | 0.69031 | 0.70333  |
| 0.36130 | 0.37629 | 0.74266  |
| 0.74298 | 0.65266 | 0.34343  |
| 0.26969 | 0.28319 | 0.43616  |
| 0.30375 | 0.38201 | 0.67670  |
| 0.76575 | 0.21609 | 0.43847  |
| 0.79329 | 0.18369 | 0.36968  |
| 0.85856 | 0.18671 | 0.32864  |
| 0.29761 | 0.31559 | 0.36791  |
| 0.88864 | 0.15649 | 0.27055  |
| 0.75838 | 0.14998 | 0.34913  |
| 0.88927 | 0.09010 | 0.19655  |
| 0.38012 | 0.66022 | 0.76496  |
| 0.61673 | 0.59173 | 0.18281  |
| 0.85476 | 0.12218 | 0.25644  |
| 0.78943 | 0.11906 | 0.29570  |
| 0.36249 | 0.31208 | 0.32521  |
| 0.26746 | 0.71667 | 0.43884  |
| 0.29318 | 0.68406 | 0.36941  |
| 0.35441 | 0.68862 | 0.31243  |
| 0.38357 | 0.65857 | 0.25225  |
| 0.26075 | 0.64902 | 0.36057  |
| 0.38786 | 0.59099 | 0.19168  |
| 0.35274 | 0.62303 | 0.25014  |
| 0.79921 | 0.48065 | 0.74630  |
| 0.79287 | 0.34599 | 0.65137  |
| 0.55002 | 0.34743 | 0.72346  |
| 0.60304 | 0.29103 | 0.62557  |
| 0.74093 | 0.59456 | 0.27877  |
| 0.23630 | 0.90922 | 0.71042  |
| 0.29245 | 0.85386 | 0.61250  |
| 0.06599 | 0.83999 | 0.78077  |
| 0.11872 | 0.78556 | 0.67108  |

|         |         |         |
|---------|---------|---------|
| 0.79387 | 0.65086 | 0.37632 |
| 0.28346 | 0.41079 | 0.67018 |
| 0.22753 | 0.35550 | 0.57196 |
| 0.43139 | 0.33597 | 0.81081 |
| 0.56671 | 0.66046 | 0.21138 |
| 0.37881 | 0.28070 | 0.70478 |
| 0.73354 | 0.24630 | 0.28242 |
| 0.61555 | 0.71537 | 0.32398 |
| 0.77138 | 0.91214 | 0.68849 |
| 0.71499 | 0.85816 | 0.58635 |
| 0.92208 | 0.83640 | 0.81405 |
| 0.86915 | 0.78252 | 0.70260 |
| 0.24804 | 0.74915 | 0.28050 |
| 0.71071 | 0.58937 | 0.65132 |
| 0.76762 | 0.64415 | 0.55357 |
| 0.57883 | 0.66590 | 0.82941 |
| 0.62919 | 0.72083 | 0.71864 |
| 0.23557 | 0.09160 | 0.70529 |
| 0.29130 | 0.14749 | 0.61083 |
| 0.06468 | 0.15997 | 0.77937 |
| 0.11708 | 0.21507 | 0.67235 |
| 0.69454 | 0.40920 | 0.36364 |
| 0.75316 | 0.35437 | 0.45743 |
| 0.57071 | 0.33201 | 0.17007 |
| 0.62322 | 0.27657 | 0.27577 |
| 0.22630 | 0.91106 | 0.31985 |
| 0.28008 | 0.85648 | 0.42369 |
| 0.07897 | 0.83597 | 0.17830 |
| 0.12952 | 0.78136 | 0.28985 |
| 0.26680 | 0.59060 | 0.30034 |
| 0.21143 | 0.64567 | 0.39961 |
| 0.43141 | 0.66167 | 0.20743 |
| 0.37955 | 0.71615 | 0.31820 |
| 0.74233 | 0.75158 | 0.71829 |
| 0.76333 | 0.09204 | 0.28414 |
| 0.70672 | 0.14773 | 0.37802 |
| 0.93931 | 0.15857 | 0.23652 |
| 0.88584 | 0.21316 | 0.34410 |
| 0.25755 | 0.24926 | 0.72041 |
| 0.22108 | 0.08991 | 0.32388 |
| 0.27818 | 0.14552 | 0.41795 |
| 0.06576 | 0.16335 | 0.20322 |
| 0.11946 | 0.21877 | 0.30646 |
| 0.71667 | 0.51602 | 0.16519 |
| 0.57479 | 0.49843 | 0.57466 |
| 0.28721 | 0.52229 | 0.86164 |
| 0.41955 | 0.49819 | 0.41949 |
| 0.50979 | 0.49863 | 0.35719 |
| 0.57724 | 0.46983 | 0.36160 |
| 0.49698 | 0.50087 | 0.64427 |
| 0.41890 | 0.47328 | 0.63447 |
| 0.36272 | 0.44476 | 0.00131 |
| 0.50175 | 0.55377 | 0.25482 |
| 0.50030 | 0.55513 | 0.74892 |
| 0.64716 | 0.44791 | 0.99559 |
| 0.30498 | 0.50095 | 0.01452 |
| 0.29640 | 0.52652 | 0.14125 |
| 0.08051 | 0.02479 | 0.37914 |
| 0.21772 | 0.02174 | 0.86367 |
| 0.19756 | 0.99894 | 0.00467 |
| 0.99602 | 0.00198 | 0.35609 |
| 0.78417 | 0.02145 | 0.13534 |
| 0.80480 | 0.99937 | 0.99527 |
| 0.92231 | 0.02541 | 0.62077 |
| 0.00631 | 0.00226 | 0.64358 |
| 0.13891 | 0.05521 | 0.00751 |
| 0.86370 | 0.05545 | 0.99349 |
| 0.00126 | 0.94452 | 0.24991 |
| 0.00055 | 0.94483 | 0.74902 |
| 0.21122 | 0.97548 | 0.14002 |
| 0.92202 | 0.99056 | 0.41866 |
| 0.79109 | 0.97668 | 0.85727 |
| 0.08026 | 0.99032 | 0.58166 |
| 0.27067 | 0.40820 | 0.28817 |
| 0.21230 | 0.35237 | 0.37908 |
| 0.44376 | 0.33985 | 0.23352 |
| 0.38881 | 0.28518 | 0.33830 |
| 0.76236 | 0.25208 | 0.72156 |
| 0.76883 | 0.91095 | 0.29796 |
| 0.71254 | 0.85600 | 0.39834 |
| 0.93316 | 0.83922 | 0.20867 |
| 0.88030 | 0.78495 | 0.31941 |
| 0.25430 | 0.75159 | 0.72127 |
| 0.27179 | 0.59022 | 0.69020 |
| 0.21870 | 0.64500 | 0.58589 |
| 0.42520 | 0.66382 | 0.81759 |
| 0.37549 | 0.71842 | 0.70480 |
| 0.75292 | 0.75204 | 0.27771 |

|         |          |          |
|---------|----------|----------|
| 0.78588 | 0.09002  | 0.66978  |
| 0.72926 | 0.14557  | 0.57423  |
| 0.93671 | 0.16426  | 0.80357  |
| 0.88324 | 0.21982  | 0.70052  |
| 0.24485 | 0.25113  | 0.27919  |
| 0.73765 | 0.40462  | 0.73030  |
| 0.72534 | 0.53303  | 0.67757  |
| 0.73396 | 0.56702  | 0.79488  |
| 0.80582 | 0.55231  | 0.71011  |
| 0.84077 | 0.57248  | 0.81684  |
| 0.83102 | 0.62630  | -0.03829 |
| 0.80795 | 0.59364  | 0.07672  |
| 0.75517 | 0.60078  | -0.04921 |
| 0.79393 | 0.41648  | 0.03966  |
| 0.71097 | 0.47181  | 0.12096  |
| 0.81065 | 0.40572  | 0.82497  |
| 0.87744 | 0.43910  | 0.82296  |
| 0.88474 | 0.39556  | -0.09492 |
| 0.90351 | 0.42882  | 0.11073  |
| 0.91386 | 0.46899  | 0.01540  |
| 0.85740 | 0.47130  | 0.13891  |
| 0.93825 | 0.53362  | 0.77841  |
| 0.99574 | 0.52374  | 0.89426  |
| 0.91736 | 0.50069  | 0.89468  |
| 0.90893 | 0.57539  | 0.13883  |
| 0.97080 | 0.54123  | 0.10280  |
| 0.88570 | 0.52768  | 0.10485  |
| 0.94978 | 0.60510  | -0.17244 |
| 0.93966 | 0.62045  | -0.02122 |
| 0.00761 | 0.59093  | -0.06130 |
| 0.43953 | 0.40004  | 0.12400  |
| 0.93876 | 0.10120  | 0.88042  |
| 0.36767 | 0.55806  | 0.79451  |
| 0.56510 | 0.60152  | 0.88304  |
| 0.13111 | 0.05659  | 0.78142  |
| 0.06698 | 0.09966  | 0.87803  |
| 0.62645 | 0.55866  | 0.78027  |
| 0.43666 | 0.39938  | 0.88164  |
| 0.86981 | 0.94313  | 0.78823  |
| 0.93359 | 0.90012  | 0.11609  |
| 0.37980 | 0.44318  | 0.22931  |
| 0.93365 | 0.89956  | 0.88186  |
| 0.38040 | 0.44228  | 0.77077  |
| 0.43579 | 0.60035  | 0.12427  |
| 0.87036 | 0.05625  | 0.21905  |
| 0.93528 | 0.09961  | 0.12522  |
| 0.36950 | 0.55705  | 0.21376  |
| 0.87369 | 0.94375  | 0.21870  |
| 0.56652 | 0.39709  | 0.10676  |
| 0.13179 | 0.94249  | 0.21106  |
| 0.06775 | 0.89933  | 0.11588  |
| 0.61121 | 0.43912  | 0.23642  |
| 0.19331 | -0.00049 | 0.11049  |
| 0.94158 | 0.00258  | 0.34846  |
| 0.69338 | 0.49174  | 0.16634  |
| 0.44431 | 0.50284  | 0.34627  |
| 0.80728 | 0.99910  | 0.10505  |
| 0.06407 | 0.00046  | 0.34886  |
| 0.30889 | 0.50102  | 0.11404  |
| 0.56524 | 0.49676  | 0.35122  |
| 0.80932 | 0.00049  | 0.88804  |
| 0.06078 | 0.00274  | 0.65124  |
| 0.30800 | 0.49951  | 0.89426  |
| 0.55337 | 0.50409  | 0.65073  |
| 0.19476 | 0.99924  | 0.89328  |
| 0.93836 | 0.00096  | 0.65072  |
| 0.43286 | 0.49915  | 0.65505  |
| 0.00181 | 0.96088  | 0.17987  |
| 0.50269 | 0.47041  | 0.13108  |
| 0.99923 | 0.02918  | 0.13451  |
| 0.50453 | 0.53891  | 0.18162  |
| 0.00027 | 0.96114  | 0.81915  |
| 0.50092 | 0.47174  | 0.86624  |
| 0.00330 | 0.02943  | 0.86653  |
| 0.49812 | 0.53987  | 0.82138  |
| 0.07445 | 0.97081  | -0.00077 |
| 0.60417 | 0.46215  | 0.99626  |
| 0.90265 | 0.03920  | 0.99513  |
| 0.42912 | 0.52912  | 0.00454  |
| 0.92763 | 0.97094  | -0.00003 |
| 0.40158 | 0.46115  | 0.00102  |
| 0.09992 | 0.03898  | 0.00572  |
| 0.57674 | 0.53024  | 0.99751  |
| 0.56870 | 0.60095  | 0.11597  |
| 0.12038 | 0.05762  | 0.23355  |
| 0.06390 | 0.10066  | 0.12308  |
| 0.63642 | 0.55804  | 0.20416  |
| 0.56406 | 0.40184  | 0.86559  |

0.12856 0.94358 0.78009  
0.06798 0.90000 0.88159  
0.62306 0.44575 0.76222  
0.43161 0.60110 0.89046  
0.88384 0.05831 0.76666  
0.69681 0.50139 0.86052  
0.80480 0.53246 0.93890  
0.77889 0.46733 -0.04863  
0.76925 0.50491 0.85074  
0.91201 -0.00029 0.15594  
0.50081 0.56945 0.00247  
0.08783 -0.00007 0.16089  
0.59153 0.49986 0.15479  
0.00139 0.06907 0.00103  
0.50225 0.43126 0.99706  
0.41627 0.49929 0.16314  
0.41067 0.50066 0.84540  
0.91462 0.00036 0.83886  
0.09035 -0.00019 0.84364  
0.58614 0.50101 0.83943  
0.00093 0.93071 0.99891

## POSCAR file for gd\_p5\_prime

POSCAR file from zrtepb-gd-ipa-c.res: C: 146 F: 1 H: 126 O: 66 P: 1 ZR: 12  
34.89200000000000

0.5792995890490465 -0.0000450140396845 0.0007649282407427  
-0.0000781726227076 1.0082675674799713 0.0000166934211398  
0.0004256087542374 0.0000053656439079 0.3214078049098053

146 1 126 66 1 12

Direct

0.79291 0.88334 0.30188  
0.65046 0.62488 0.24106  
0.26326 0.64927 0.63617  
0.29154 0.61779 0.30907  
0.39813 0.34302 0.27580  
0.23203 0.78318 0.43673  
0.20694 0.81555 0.36643  
0.15270 0.80970 0.29092  
0.12430 0.83984 0.23014  
0.23378 0.85220 0.37469  
0.26588 0.34914 0.34294  
0.11441 0.90876 0.18588  
0.71676 0.62405 0.27510  
0.14918 0.87666 0.24441  
0.38297 0.59169 0.82156  
0.20478 0.88257 0.31561  
0.39946 0.40935 0.20063  
0.72384 0.28140 0.43577  
0.69768 0.31384 0.36820  
0.64504 0.30857 0.28880  
0.61768 0.33938 0.22998  
0.72397 0.35047 0.38332  
0.61073 0.40850 0.18867  
0.88606 0.84302 0.25211  
0.64239 0.37598 0.25005  
0.69615 0.38142 0.32591  
0.34966 0.62383 0.76047  
0.36435 0.37720 0.25877  
0.29800 0.38018 0.29210  
0.74204 0.24809 0.37615  
0.24914 0.74945 0.37834  
0.25629 0.24981 0.62157  
0.74261 0.75294 0.61936  
0.25252 0.75118 0.62371  
0.20690 0.18498 0.63104  
0.75602 0.25212 0.62171  
0.75172 0.75224 0.37420  
0.24858 0.25111 0.37554  
0.29134 0.61877 0.69613  
0.76780 0.78551 0.43567  
0.22977 0.21818 0.43673  
0.20165 0.18574 0.37094  
0.14386 0.19108 0.30430  
0.11352 0.16052 0.24889  
0.22956 0.14932 0.37687  
0.23384 0.78396 0.56251  
0.10582 0.09176 0.20234  
0.13991 0.12398 0.26080  
0.19853 0.11850 0.32389  
0.79512 0.81782 0.36789  
0.20747 0.81666 0.63094  
0.14325 0.81334 0.67691  
0.11398 0.84348 0.73650  
0.24236 0.85053 0.64907  
0.11331 0.90999 0.80710  
0.23383 0.21752 0.56230

|         |         |          |
|---------|---------|----------|
| 0.14773 | 0.87795 | 0.74770  |
| 0.21224 | 0.88138 | 0.70456  |
| 0.76274 | 0.85289 | 0.35893  |
| 0.73013 | 0.28326 | 0.56105  |
| 0.14247 | 0.18800 | 0.67621  |
| 0.70174 | 0.31633 | 0.62541  |
| 0.63315 | 0.31681 | 0.64363  |
| 0.60287 | 0.34789 | 0.69653  |
| 0.88933 | 0.91028 | 0.18936  |
| 0.73924 | 0.34781 | 0.66061  |
| 0.73029 | 0.71949 | 0.43236  |
| 0.60645 | 0.41232 | 0.78568  |
| 0.64022 | 0.38001 | 0.72546  |
| 0.70844 | 0.38009 | 0.70629  |
| 0.85495 | 0.87847 | 0.24939  |
| 0.77448 | 0.21881 | 0.56198  |
| 0.92284 | 0.57669 | -0.18163 |
| 0.93963 | 0.54707 | 0.61883  |
| 0.95155 | 0.50761 | 0.80072  |
| 0.11302 | 0.15754 | 0.73414  |
| 0.80307 | 0.18667 | 0.62809  |
| 0.85875 | 0.19236 | 0.70011  |
| 0.88910 | 0.16180 | 0.75555  |
| 0.77707 | 0.14987 | 0.61695  |
| 0.70570 | 0.68699 | 0.36087  |
| 0.89842 | 0.09272 | 0.79776  |
| 0.86463 | 0.12500 | 0.73895  |
| 0.80795 | 0.11915 | 0.67055  |
| 0.24174 | 0.15103 | 0.64799  |
| 0.11298 | 0.09079 | 0.80443  |
| 0.14677 | 0.12304 | 0.74449  |
| 0.21141 | 0.11994 | 0.70168  |
| 0.72501 | 0.71989 | 0.55792  |
| 0.69778 | 0.68762 | 0.62525  |
| 0.26918 | 0.71739 | 0.56534  |
| 0.63956 | 0.68778 | 0.32461  |
| 0.64851 | 0.69431 | 0.71110  |
| 0.61936 | 0.66431 | 0.77171  |
| 0.71841 | 0.65017 | 0.60439  |
| 0.60511 | 0.59487 | 0.80677  |
| 0.63838 | 0.62700 | 0.74601  |
| 0.68815 | 0.62010 | 0.66245  |
| 0.76382 | 0.78580 | 0.56131  |
| 0.78972 | 0.81784 | 0.63259  |
| 0.84666 | 0.81149 | 0.70081  |
| 0.87669 | 0.84112 | 0.76158  |
| 0.61258 | 0.65736 | 0.26320  |
| 0.29391 | 0.68500 | 0.63614  |
| 0.76185 | 0.85428 | 0.63174  |
| 0.88712 | 0.90959 | 0.81160  |
| 0.80058 | 0.44773 | 0.77112  |
| 0.85084 | 0.87789 | 0.75392  |
| 0.91315 | 0.54056 | 0.74507  |
| 0.83967 | 0.52916 | 0.73603  |
| 0.79328 | 0.55973 | 0.69099  |
| 0.79264 | 0.88420 | 0.69028  |
| 0.85454 | 0.46804 | 0.08948  |
| 0.85659 | 0.81302 | 0.31198  |
| 0.88440 | 0.43097 | 1.04575  |
| 0.27523 | 0.28270 | 0.56039  |
| 0.90524 | 0.49978 | 0.08397  |
| 0.30235 | 0.31516 | 0.62717  |
| 0.35745 | 0.30952 | 0.70066  |
| 0.38677 | 0.34001 | 0.75814  |
| 0.27570 | 0.35180 | 0.61673  |
| 0.39520 | 0.40889 | 0.80195  |
| 0.35138 | 0.69002 | 0.70402  |
| 0.36172 | 0.37671 | 0.74219  |
| 0.74462 | 0.65542 | 0.33141  |
| 0.27175 | 0.28327 | 0.43475  |
| 0.30550 | 0.38248 | 0.67259  |
| 0.76741 | 0.21685 | 0.43687  |
| 0.79502 | 0.18418 | 0.36954  |
| 0.86185 | 0.18578 | 0.33683  |
| 0.30048 | 0.31558 | 0.36700  |
| 0.89151 | 0.15546 | 0.27864  |
| 0.75831 | 0.15167 | 0.34160  |
| 0.88937 | 0.09027 | 0.19580  |
| 0.37874 | 0.65985 | 0.76620  |
| 0.61718 | 0.59237 | 0.18152  |
| 0.85546 | 0.12231 | 0.25668  |
| 0.78876 | 0.12049 | 0.28854  |
| 0.36679 | 0.31277 | 0.33167  |
| 0.26752 | 0.71660 | 0.43956  |
| 0.29358 | 0.68374 | 0.37167  |
| 0.35538 | 0.68792 | 0.31642  |
| 0.38484 | 0.65755 | 0.25841  |
| 0.26111 | 0.64869 | 0.36364  |



|         |         |         |
|---------|---------|---------|
| 0.38897 | 0.59002 | 0.19842 |
| 0.35386 | 0.62202 | 0.25707 |
| 0.71686 | 0.44668 | 0.90534 |
| 0.79304 | 0.34746 | 0.64794 |
| 0.54967 | 0.34798 | 0.71520 |
| 0.60368 | 0.29225 | 0.61570 |
| 0.74618 | 0.59851 | 0.25757 |
| 0.23827 | 0.90844 | 0.71585 |
| 0.29366 | 0.85275 | 0.61821 |
| 0.06406 | 0.84120 | 0.77385 |
| 0.11617 | 0.78669 | 0.66373 |
| 0.79700 | 0.65509 | 0.35646 |
| 0.28578 | 0.41133 | 0.66370 |
| 0.23097 | 0.35604 | 0.56385 |
| 0.43002 | 0.33628 | 0.81547 |
| 0.56117 | 0.65773 | 0.23291 |
| 0.37807 | 0.28085 | 0.70948 |
| 0.73857 | 0.24713 | 0.27866 |
| 0.60916 | 0.71260 | 0.34652 |
| 0.77237 | 0.91303 | 0.68622 |
| 0.71558 | 0.85919 | 0.58394 |
| 0.92158 | 0.83667 | 0.81410 |
| 0.86823 | 0.78293 | 0.70270 |
| 0.24878 | 0.74892 | 0.28057 |
| 0.70187 | 0.59065 | 0.64317 |
| 0.75840 | 0.64466 | 0.54114 |
| 0.58058 | 0.66893 | 0.83841 |
| 0.63207 | 0.72353 | 0.72737 |
| 0.23754 | 0.09284 | 0.71088 |
| 0.29300 | 0.14890 | 0.61688 |
| 0.06294 | 0.15958 | 0.77090 |
| 0.11529 | 0.21464 | 0.66378 |
| 0.71541 | 0.41023 | 0.33867 |
| 0.76675 | 0.35442 | 0.44139 |
| 0.57614 | 0.33608 | 0.16844 |
| 0.62453 | 0.28000 | 0.27661 |
| 0.22433 | 0.91144 | 0.32506 |
| 0.27790 | 0.85686 | 0.42883 |
| 0.08137 | 0.83577 | 0.17229 |
| 0.13173 | 0.78108 | 0.28340 |
| 0.26727 | 0.58997 | 0.30643 |
| 0.21142 | 0.64561 | 0.40130 |
| 0.43289 | 0.66044 | 0.21419 |
| 0.38065 | 0.71543 | 0.32161 |
| 0.74035 | 0.75286 | 0.71706 |
| 0.76095 | 0.09437 | 0.27097 |
| 0.70563 | 0.15055 | 0.36459 |
| 0.94337 | 0.15658 | 0.25055 |
| 0.89055 | 0.21127 | 0.35838 |
| 0.25816 | 0.24971 | 0.71927 |
| 0.21926 | 0.08981 | 0.32974 |
| 0.27636 | 0.14534 | 0.42382 |
| 0.06841 | 0.16411 | 0.19633 |
| 0.12215 | 0.21957 | 0.29903 |
| 0.71472 | 0.52634 | 0.13334 |
| 0.57443 | 0.50132 | 0.56995 |
| 0.28811 | 0.52285 | 0.86836 |
| 0.42952 | 0.50165 | 0.43058 |
| 0.50463 | 0.49865 | 0.35730 |
| 0.58862 | 0.47290 | 0.36333 |
| 0.49845 | 0.50158 | 0.64103 |
| 0.41727 | 0.47371 | 0.63330 |
| 0.36417 | 0.44479 | 0.00347 |
| 0.50441 | 0.55410 | 0.25469 |
| 0.49771 | 0.55632 | 0.74870 |
| 0.64826 | 0.45103 | 0.98107 |
| 0.30618 | 0.50057 | 0.00851 |
| 0.29448 | 0.52421 | 0.14700 |
| 0.08020 | 0.02513 | 0.37863 |
| 0.21849 | 0.02186 | 0.86372 |
| 0.19783 | 0.99915 | 0.00553 |
| 0.99566 | 0.00230 | 0.35528 |
| 0.78414 | 0.02162 | 0.13296 |
| 0.80511 | 0.99979 | 0.99333 |
| 0.92331 | 0.02607 | 0.61981 |
| 0.00718 | 0.00270 | 0.64271 |
| 0.13925 | 0.05554 | 0.00713 |
| 0.86405 | 0.05591 | 0.99187 |
| 0.00130 | 0.94493 | 0.24909 |
| 0.00133 | 0.94532 | 0.74797 |
| 0.21094 | 0.97549 | 0.14009 |
| 0.92158 | 0.99105 | 0.41754 |
| 0.79153 | 0.97736 | 0.85430 |
| 0.08114 | 0.99068 | 0.58116 |
| 0.27203 | 0.40708 | 0.27710 |
| 0.21341 | 0.35117 | 0.36680 |
| 0.44963 | 0.34097 | 0.24607 |
| 0.39389 | 0.28644 | 0.34991 |

|          |         |          |
|----------|---------|----------|
| 0.75973  | 0.25312 | 0.71917  |
| 0.76901  | 0.91121 | 0.29639  |
| 0.71314  | 0.85607 | 0.39685  |
| 0.93412  | 0.83993 | 0.20800  |
| 0.88157  | 0.78547 | 0.31845  |
| 0.25317  | 0.75174 | 0.72146  |
| 0.26878  | 0.59049 | 0.69300  |
| 0.21668  | 0.64548 | 0.58835  |
| 0.42399  | 0.66322 | 0.81848  |
| 0.37541  | 0.71794 | 0.70481  |
| 0.75502  | 0.75221 | 0.27661  |
| 0.78869  | 0.09022 | 0.66107  |
| 0.73197  | 0.14555 | 0.56514  |
| 0.93280  | 0.16560 | 0.81170  |
| 0.87908  | 0.22109 | 0.70924  |
| 0.24653  | 0.25126 | 0.27785  |
| 0.73701  | 0.40559 | 0.72854  |
| 0.77434  | 0.42084 | 0.78811  |
| 0.78843  | 0.45673 | 0.67974  |
| 0.85417  | 0.44254 | 0.77961  |
| 0.83798  | 0.50454 | 0.67512  |
| 0.80796  | 0.57003 | 0.60197  |
| 0.79285  | 0.58425 | -0.24762 |
| 0.74245  | 0.54853 | 0.68452  |
| 0.84044  | 0.46396 | 0.18432  |
| 0.72447  | 0.48518 | 0.06206  |
| 0.84877  | 0.40738 | 1.04940  |
| 0.90318  | 0.43345 | 0.95372  |
| 0.92654  | 0.42383 | 1.10403  |
| 0.94713  | 0.49273 | 0.14294  |
| 0.92457  | 0.50314 | -0.00735 |
| 0.88404  | 0.52707 | 0.11360  |
| 0.94532  | 0.48132 | 0.74791  |
| 0.00488  | 0.51424 | 0.80360  |
| 0.93475  | 0.50164 | 0.89238  |
| 0.90173  | 0.60175 | -0.22701 |
| 0.97613  | 0.58214 | -0.16871 |
| 0.89966  | 0.57431 | -0.09295 |
| 0.93214  | 0.52181 | 0.56189  |
| 0.91583  | 0.57163 | 0.57517  |
| -0.00672 | 0.55282 | 0.62220  |
| 0.44322  | 0.40006 | 0.12437  |
| 0.93891  | 0.10177 | 0.87974  |
| 0.36550  | 0.55779 | 0.79649  |
| 0.56194  | 0.60376 | 0.88497  |
| 0.13174  | 0.05697 | 0.78110  |
| 0.06737  | 0.10005 | 0.87707  |
| 0.62108  | 0.56136 | 0.77654  |
| 0.43697  | 0.39978 | 0.88152  |
| 0.87054  | 0.94364 | 0.78659  |
| 0.93377  | 0.90061 | 0.11478  |
| 0.38314  | 0.44311 | 0.22920  |
| 0.93398  | 0.89999 | 0.88079  |
| 0.38035  | 0.44272 | 0.77141  |
| 0.43508  | 0.59972 | 0.12761  |
| 0.86996  | 0.05641 | 0.21700  |
| 0.93558  | 0.09978 | 0.12491  |
| 0.37229  | 0.55588 | 0.22279  |
| 0.87368  | 0.94421 | 0.21710  |
| 0.57104  | 0.39966 | 0.10570  |
| 0.13166  | 0.94271 | 0.21115  |
| 0.06787  | 0.89962 | 0.11534  |
| 0.62493  | 0.44213 | 0.22204  |
| 0.19344  | 0.99964 | 0.11060  |
| 0.94134  | 0.00292 | 0.34727  |
| 0.70075  | 0.49969 | 0.13325  |
| 0.45015  | 0.50050 | 0.35174  |
| 0.80738  | 0.99935 | 0.10241  |
| 0.06384  | 0.00078 | 0.34837  |
| 0.31144  | 0.50013 | 0.11596  |
| 0.57210  | 0.49831 | 0.34332  |
| 0.80992  | 0.00105 | 0.88555  |
| 0.06158  | 0.00307 | 0.65070  |
| 0.30801  | 0.49951 | 0.89904  |
| 0.55284  | 0.50519 | 0.64698  |
| 0.19510  | 0.99951 | 0.89336  |
| 0.93913  | 0.00154 | 0.64952  |
| 0.43136  | 0.49963 | 0.65300  |
| 0.00182  | 0.96126 | 0.17900  |
| 0.50477  | 0.47095 | 0.12974  |
| 0.99933  | 0.02954 | 0.13348  |
| 0.50512  | 0.53895 | 0.18196  |
| 0.00087  | 0.96157 | 0.81824  |
| 0.50141  | 0.47240 | 0.86548  |
| 0.00389  | 0.02986 | 0.86575  |
| 0.49643  | 0.54075 | 0.82055  |
| 0.07477  | 0.97118 | 0.99875  |
| 0.60525  | 0.46354 | -0.00787 |

|         |         |          |
|---------|---------|----------|
| 0.90296 | 0.03963 | 0.99362  |
| 0.42889 | 0.52912 | 0.00544  |
| 0.92802 | 0.97138 | -0.00146 |
| 0.40300 | 0.46120 | 0.00159  |
| 0.10023 | 0.03934 | 0.00531  |
| 0.57549 | 0.53126 | -0.00408 |
| 0.56771 | 0.60142 | 0.11814  |
| 0.12030 | 0.05792 | 0.23337  |
| 0.06422 | 0.10094 | 0.12235  |
| 0.63822 | 0.55870 | 0.19949  |
| 0.56462 | 0.40206 | 0.86442  |
| 0.12923 | 0.94389 | 0.77986  |
| 0.06832 | 0.90037 | 0.88090  |
| 0.62128 | 0.44619 | 0.75801  |
| 0.42841 | 0.60095 | 0.89402  |
| 0.88460 | 0.05898 | 0.76496  |
| 0.70879 | 0.50773 | 0.84706  |
| 0.81614 | 0.51766 | 0.85284  |
| 0.79183 | 0.47833 | 1.03539  |
| 0.76711 | 0.48188 | 0.87987  |
| 0.91206 | 0.00010 | 0.15443  |
| 0.50004 | 0.57010 | 0.00264  |
| 0.08786 | 0.00029 | 0.16062  |
| 0.59156 | 0.50057 | 0.15292  |
| 0.00165 | 0.06958 | 0.00008  |
| 0.50398 | 0.43163 | 0.99458  |
| 0.41684 | 0.49941 | 0.16169  |
| 0.41181 | 0.50064 | 0.84442  |
| 0.91514 | 0.00091 | 0.83732  |
| 0.09098 | 0.00022 | 0.84322  |
| 0.58775 | 0.50289 | 0.83586  |
| 0.00131 | 0.93110 | 0.99807  |

## POSCAR file for gd\_product

POSCAR file from zrtepb-gd-ipa-c.res: C: 146 F: 1 H: 126 O: 66 P: 1 ZR: 12

```

34.89200000000000
0.5792995890490465 -0.0000450140396845 0.0007649282407427
-0.0000781726227076 1.0082675674799713 0.0000166934211398
0.0004256087542374 0.0000053656439079 0.3214078049098053
146 1 126 66 1 12

```

Direct

|         |         |         |
|---------|---------|---------|
| 0.79297 | 0.88394 | 0.30048 |
| 0.64648 | 0.62649 | 0.24419 |
| 0.26460 | 0.64925 | 0.63616 |
| 0.29169 | 0.61759 | 0.30786 |
| 0.40070 | 0.34367 | 0.27711 |
| 0.23225 | 0.78304 | 0.43504 |
| 0.20727 | 0.81548 | 0.36490 |
| 0.15396 | 0.80962 | 0.28732 |
| 0.12568 | 0.83983 | 0.22666 |
| 0.23335 | 0.85225 | 0.37547 |
| 0.26677 | 0.34765 | 0.33482 |
| 0.11505 | 0.90886 | 0.18461 |
| 0.71489 | 0.62871 | 0.25898 |
| 0.14977 | 0.87673 | 0.24308 |
| 0.38759 | 0.59201 | 0.81538 |
| 0.20448 | 0.88268 | 0.31643 |
| 0.39883 | 0.40907 | 0.19371 |
| 0.71903 | 0.27934 | 0.43139 |
| 0.69464 | 0.31206 | 0.36300 |
| 0.64506 | 0.30718 | 0.27745 |
| 0.61850 | 0.33844 | 0.21977 |
| 0.71945 | 0.34868 | 0.38496 |
| 0.60933 | 0.40781 | 0.18811 |
| 0.88684 | 0.84365 | 0.25508 |
| 0.64110 | 0.37499 | 0.24705 |
| 0.69248 | 0.38004 | 0.32843 |
| 0.35329 | 0.62403 | 0.75565 |
| 0.36499 | 0.37681 | 0.25374 |
| 0.29788 | 0.37877 | 0.28264 |
| 0.73983 | 0.24642 | 0.37282 |
| 0.25008 | 0.74947 | 0.37650 |
| 0.25790 | 0.25008 | 0.62044 |
| 0.74225 | 0.75353 | 0.62025 |
| 0.25223 | 0.75088 | 0.62198 |
| 0.20689 | 0.18548 | 0.63031 |
| 0.75005 | 0.25079 | 0.61924 |
| 0.74972 | 0.75353 | 0.37459 |
| 0.25023 | 0.25089 | 0.37438 |
| 0.29389 | 0.61881 | 0.69465 |
| 0.76700 | 0.78647 | 0.43665 |
| 0.23025 | 0.21835 | 0.43625 |
| 0.20184 | 0.18585 | 0.37109 |
| 0.14624 | 0.19147 | 0.29898 |
| 0.11600 | 0.16093 | 0.24327 |
| 0.22767 | 0.14909 | 0.38261 |

|         |         |          |
|---------|---------|----------|
| 0.23337 | 0.78365 | 0.56081  |
| 0.10652 | 0.09195 | 0.20110  |
| 0.14035 | 0.12415 | 0.26017  |
| 0.19678 | 0.11834 | 0.32909  |
| 0.79500 | 0.81870 | 0.36914  |
| 0.20675 | 0.81638 | 0.62891  |
| 0.14154 | 0.81376 | 0.67048  |
| 0.11246 | 0.84399 | 0.72996  |
| 0.24267 | 0.84966 | 0.65078  |
| 0.11352 | 0.90998 | 0.80543  |
| 0.23433 | 0.21794 | 0.56169  |
| 0.14746 | 0.87788 | 0.74529  |
| 0.21283 | 0.88065 | 0.70605  |
| 0.76246 | 0.85363 | 0.35776  |
| 0.72281 | 0.28121 | 0.55688  |
| 0.14032 | 0.18688 | 0.66467  |
| 0.69427 | 0.31449 | 0.61904  |
| 0.62580 | 0.32065 | 0.61433  |
| 0.59795 | 0.35278 | 0.66565  |
| 0.88993 | 0.91062 | 0.18907  |
| 0.73418 | 0.34125 | 0.67628  |
| 0.72747 | 0.72096 | 0.43269  |
| 0.60764 | 0.41323 | 0.78031  |
| 0.63866 | 0.38033 | 0.71739  |
| 0.70685 | 0.37442 | 0.72240  |
| 0.85547 | 0.87900 | 0.24984  |
| 0.77166 | 0.21795 | 0.56057  |
| 0.92594 | 0.56629 | 0.97039  |
| 0.93023 | 0.58390 | 0.75452  |
| 0.94740 | 0.51689 | 0.81631  |
| 0.11112 | 0.15630 | 0.72233  |
| 0.80106 | 0.18621 | 0.62751  |
| 0.85428 | 0.19267 | 0.70467  |
| 0.88559 | 0.16243 | 0.76019  |
| 0.77822 | 0.14890 | 0.61151  |
| 0.70160 | 0.68872 | 0.36195  |
| 0.89918 | 0.09317 | 0.79709  |
| 0.86441 | 0.12520 | 0.73888  |
| 0.80993 | 0.11857 | 0.66554  |
| 0.24383 | 0.15294 | 0.65673  |
| 0.11393 | 0.09078 | 0.80270  |
| 0.14738 | 0.12312 | 0.74238  |
| 0.21392 | 0.12154 | 0.70948  |
| 0.72347 | 0.72082 | 0.55827  |
| 0.69778 | 0.68792 | 0.62493  |
| 0.26961 | 0.71725 | 0.56343  |
| 0.63312 | 0.68638 | 0.34569  |
| 0.65127 | 0.69385 | 0.71609  |
| 0.62414 | 0.66332 | 0.77708  |
| 0.71772 | 0.65062 | 0.59876  |
| 0.61137 | 0.59399 | 0.81053  |
| 0.64283 | 0.62621 | 0.74753  |
| 0.69008 | 0.61999 | 0.65856  |
| 0.76350 | 0.78644 | 0.56230  |
| 0.78961 | 0.81834 | 0.63365  |
| 0.84594 | 0.81184 | 0.70336  |
| 0.87607 | 0.84147 | 0.76386  |
| 0.60588 | 0.65599 | 0.28462  |
| 0.29522 | 0.68498 | 0.63390  |
| 0.76232 | 0.85492 | 0.63122  |
| 0.88746 | 0.91001 | 0.81139  |
| 0.80077 | 0.46008 | 0.76231  |
| 0.85088 | 0.87836 | 0.75449  |
| 0.90937 | 0.55339 | 0.84384  |
| 0.83420 | 0.54571 | 0.83195  |
| 0.79032 | 0.57948 | 0.85973  |
| 0.79319 | 0.88483 | 0.68955  |
| 0.78270 | 0.42217 | 0.06505  |
| 0.85707 | 0.81386 | 0.31552  |
| 0.82078 | 0.40003 | -0.02786 |
| 0.27771 | 0.28265 | 0.55860  |
| 0.82536 | 0.43251 | 0.17110  |
| 0.30530 | 0.31529 | 0.62417  |
| 0.35984 | 0.30980 | 0.69897  |
| 0.38949 | 0.34048 | 0.75498  |
| 0.27958 | 0.35203 | 0.61062  |
| 0.39906 | 0.40954 | 0.79463  |
| 0.35379 | 0.69015 | 0.69853  |
| 0.36532 | 0.37723 | 0.73609  |
| 0.74239 | 0.66033 | 0.31450  |
| 0.27425 | 0.28294 | 0.43309  |
| 0.30970 | 0.38290 | 0.66491  |
| 0.76623 | 0.21582 | 0.43530  |
| 0.79566 | 0.18345 | 0.36951  |
| 0.86406 | 0.18351 | 0.34981  |
| 0.30298 | 0.31514 | 0.36473  |
| 0.89423 | 0.15342 | 0.29134  |
| 0.75798 | 0.15263 | 0.32982  |

|         |         |         |
|---------|---------|---------|
| 0.89060 | 0.09012 | 0.19536 |
| 0.38229 | 0.66010 | 0.75968 |
| 0.61358 | 0.59388 | 0.18541 |
| 0.85676 | 0.12190 | 0.25727 |
| 0.78862 | 0.12145 | 0.27733 |
| 0.37018 | 0.31343 | 0.33454 |
| 0.26845 | 0.71657 | 0.43763 |
| 0.29424 | 0.68369 | 0.36945 |
| 0.35506 | 0.68796 | 0.31071 |
| 0.38382 | 0.65755 | 0.25154 |
| 0.26199 | 0.64849 | 0.36374 |
| 0.38753 | 0.58985 | 0.19260 |
| 0.35309 | 0.62192 | 0.25235 |
| 0.67022 | 0.42593 | 1.01456 |
| 0.78775 | 0.33654 | 0.68069 |
| 0.54419 | 0.35673 | 0.66635 |
| 0.59430 | 0.29962 | 0.57007 |
| 0.74644 | 0.60566 | 0.22593 |
| 0.23977 | 0.90727 | 0.72027 |
| 0.29455 | 0.85133 | 0.62292 |
| 0.06179 | 0.84220 | 0.76415 |
| 0.11355 | 0.78762 | 0.65413 |
| 0.79614 | 0.66254 | 0.32548 |
| 0.29067 | 0.41181 | 0.65342 |
| 0.23546 | 0.35624 | 0.55605 |
| 0.43237 | 0.33681 | 0.81327 |
| 0.55253 | 0.65413 | 0.26901 |
| 0.37980 | 0.28106 | 0.71025 |
| 0.73844 | 0.24538 | 0.27515 |
| 0.60139 | 0.70878 | 0.38242 |
| 0.77351 | 0.91377 | 0.68419 |
| 0.71651 | 0.85992 | 0.58209 |
| 0.92054 | 0.83696 | 0.81744 |
| 0.86696 | 0.78315 | 0.70645 |
| 0.25009 | 0.74905 | 0.27870 |
| 0.70440 | 0.59074 | 0.63748 |
| 0.75521 | 0.64571 | 0.53004 |
| 0.58730 | 0.66739 | 0.84762 |
| 0.63533 | 0.72292 | 0.73648 |
| 0.24199 | 0.09545 | 0.72579 |
| 0.29639 | 0.15202 | 0.63291 |
| 0.05939 | 0.15723 | 0.75128 |
| 0.11134 | 0.21236 | 0.64435 |
| 0.71009 | 0.40888 | 0.34692 |
| 0.75969 | 0.35233 | 0.44894 |
| 0.57900 | 0.33550 | 0.15386 |
| 0.62597 | 0.27857 | 0.25980 |
| 0.22338 | 0.91162 | 0.32773 |
| 0.27667 | 0.85699 | 0.43160 |
| 0.08346 | 0.83572 | 0.16715 |
| 0.13357 | 0.78091 | 0.27798 |
| 0.26757 | 0.58971 | 0.30676 |
| 0.21292 | 0.64536 | 0.40393 |
| 0.43108 | 0.66055 | 0.20459 |
| 0.38016 | 0.71555 | 0.31400 |
| 0.74101 | 0.75320 | 0.71801 |
| 0.75984 | 0.09651 | 0.25062 |
| 0.70431 | 0.15275 | 0.34386 |
| 0.94737 | 0.15351 | 0.27235 |
| 0.89346 | 0.20767 | 0.38111 |
| 0.25972 | 0.25013 | 0.71815 |
| 0.21595 | 0.08941 | 0.33909 |
| 0.27262 | 0.14473 | 0.43476 |
| 0.07257 | 0.16476 | 0.18646 |
| 0.12609 | 0.22021 | 0.28934 |
| 0.70486 | 0.52967 | 0.19067 |
| 0.58209 | 0.49844 | 0.57675 |
| 0.29279 | 0.52452 | 0.85943 |
| 0.42540 | 0.50526 | 0.42546 |
| 0.49976 | 0.49789 | 0.35624 |
| 0.58474 | 0.47253 | 0.36529 |
| 0.50668 | 0.50342 | 0.64083 |
| 0.42447 | 0.47508 | 0.62585 |
| 0.36557 | 0.44486 | 0.99456 |
| 0.50219 | 0.55373 | 0.25397 |
| 0.50412 | 0.55694 | 0.74872 |
| 0.64768 | 0.44807 | 0.98075 |
| 0.30720 | 0.50082 | 0.99180 |
| 0.29226 | 0.52321 | 0.13892 |
| 0.08124 | 0.02529 | 0.37726 |
| 0.21943 | 0.02164 | 0.86248 |
| 0.19865 | 0.99917 | 0.00459 |
| 0.99656 | 0.00249 | 0.35426 |
| 0.78462 | 0.02158 | 0.13148 |
| 0.80593 | 0.00026 | 0.99277 |
| 0.92436 | 0.02638 | 0.61877 |
| 0.00804 | 0.00289 | 0.64168 |
| 0.14020 | 0.05559 | 0.00595 |

|         |         |         |
|---------|---------|---------|
| 0.86492 | 0.05609 | 0.99051 |
| 0.00210 | 0.94512 | 0.24807 |
| 0.00199 | 0.94552 | 0.74684 |
| 0.21182 | 0.97567 | 0.13942 |
| 0.92259 | 0.99135 | 0.41653 |
| 0.79183 | 0.97850 | 0.85146 |
| 0.08204 | 0.99096 | 0.58006 |
| 0.27062 | 0.40495 | 0.26311 |
| 0.21379 | 0.34879 | 0.35555 |
| 0.45292 | 0.34240 | 0.25108 |
| 0.39855 | 0.28795 | 0.35773 |
| 0.75220 | 0.25197 | 0.71686 |
| 0.76892 | 0.91172 | 0.29327 |
| 0.71250 | 0.85687 | 0.39413 |
| 0.93528 | 0.84046 | 0.21245 |
| 0.88215 | 0.78639 | 0.32384 |
| 0.25263 | 0.75137 | 0.71975 |
| 0.27135 | 0.59051 | 0.69293 |
| 0.21717 | 0.64538 | 0.59110 |
| 0.42831 | 0.66364 | 0.80970 |
| 0.37767 | 0.71812 | 0.69769 |
| 0.75245 | 0.75366 | 0.27695 |
| 0.79312 | 0.08930 | 0.65234 |
| 0.73513 | 0.14386 | 0.55496 |
| 0.92754 | 0.16684 | 0.82010 |
| 0.87211 | 0.22179 | 0.71781 |
| 0.24841 | 0.25084 | 0.27667 |
| 0.73744 | 0.39563 | 0.76710 |
| 0.82896 | 0.43434 | 0.78440 |
| 0.75959 | 0.45214 | 0.70320 |
| 0.83377 | 0.48057 | 0.71810 |
| 0.82523 | 0.53655 | 0.73819 |
| 0.79987 | 0.60357 | 0.79928 |
| 0.79796 | 0.58902 | 0.95237 |
| 0.73826 | 0.57087 | 0.84991 |
| 0.73965 | 0.40501 | 0.09439 |
| 0.73131 | 0.49085 | 0.12250 |
| 0.78986 | 0.39355 | 0.89409 |
| 0.86554 | 0.41568 | 0.94387 |
| 0.83724 | 0.37303 | 0.01220 |
| 0.84511 | 0.40664 | 0.21360 |
| 0.86722 | 0.45039 | 0.14174 |
| 0.79664 | 0.44849 | 0.23805 |
| 0.93828 | 0.50719 | 0.72402 |
| 0.00114 | 0.52164 | 0.82570 |
| 0.93288 | 0.49385 | 0.87774 |
| 0.90431 | 0.59436 | 0.99069 |
| 0.98006 | 0.56863 | 0.98144 |
| 0.90703 | 0.54571 | 0.03646 |
| 0.91723 | 0.57561 | 0.66241 |
| 0.90678 | 0.61154 | 0.77372 |
| 0.98437 | 0.58801 | 0.75781 |
| 0.44270 | 0.39985 | 0.11760 |
| 0.93952 | 0.10226 | 0.87939 |
| 0.37036 | 0.55803 | 0.79054 |
| 0.56733 | 0.60271 | 0.88736 |
| 0.13311 | 0.05702 | 0.78016 |
| 0.06814 | 0.10010 | 0.87479 |
| 0.62902 | 0.56029 | 0.78407 |
| 0.44083 | 0.40052 | 0.87424 |
| 0.87122 | 0.94408 | 0.78587 |
| 0.93433 | 0.90083 | 0.11450 |
| 0.38128 | 0.44269 | 0.22082 |
| 0.93436 | 0.90038 | 0.88055 |
| 0.38456 | 0.44338 | 0.76355 |
| 0.43302 | 0.59944 | 0.12046 |
| 0.87085 | 0.05624 | 0.21528 |
| 0.93688 | 0.09983 | 0.12503 |
| 0.37090 | 0.55573 | 0.21773 |
| 0.87437 | 0.94463 | 0.21614 |
| 0.57060 | 0.39944 | 0.10302 |
| 0.13236 | 0.94279 | 0.20995 |
| 0.06849 | 0.89974 | 0.11409 |
| 0.62195 | 0.44127 | 0.22490 |
| 0.19424 | 0.99976 | 0.10968 |
| 0.94239 | 0.00317 | 0.34622 |
| 0.69824 | 0.50202 | 0.18179 |
| 0.44562 | 0.49922 | 0.34854 |
| 0.80813 | 0.99950 | 0.10025 |
| 0.06493 | 0.00091 | 0.34723 |
| 0.31148 | 0.49989 | 0.10662 |
| 0.56785 | 0.49784 | 0.34479 |
| 0.81095 | 0.00187 | 0.88357 |
| 0.06248 | 0.00323 | 0.64980 |
| 0.31028 | 0.50035 | 0.88878 |
| 0.55997 | 0.50765 | 0.64864 |
| 0.19587 | 0.99942 | 0.89254 |
| 0.94006 | 0.00180 | 0.64834 |

|         |         |         |
|---------|---------|---------|
| 0.43771 | 0.50081 | 0.64930 |
| 0.00264 | 0.96144 | 0.17796 |
| 0.50327 | 0.47052 | 0.12902 |
| 0.00026 | 0.02971 | 0.13222 |
| 0.50323 | 0.53881 | 0.18078 |
| 0.00164 | 0.96175 | 0.81717 |
| 0.50539 | 0.47316 | 0.86427 |
| 0.00489 | 0.03003 | 0.86467 |
| 0.50189 | 0.54094 | 0.81961 |
| 0.07551 | 0.97126 | 0.99768 |
| 0.60738 | 0.46358 | 0.99556 |
| 0.90395 | 0.03990 | 0.99238 |
| 0.43038 | 0.52920 | 0.00037 |
| 0.92884 | 0.97163 | 0.99736 |
| 0.40424 | 0.46140 | 0.99414 |
| 0.10112 | 0.03944 | 0.00410 |
| 0.57726 | 0.53104 | 0.99969 |
| 0.56444 | 0.60264 | 0.12079 |
| 0.12074 | 0.05812 | 0.23244 |
| 0.06541 | 0.10112 | 0.12035 |
| 0.63387 | 0.56023 | 0.20564 |
| 0.56845 | 0.40300 | 0.86317 |
| 0.12980 | 0.94386 | 0.77865 |
| 0.06861 | 0.90037 | 0.87937 |
| 0.62106 | 0.44720 | 0.75103 |
| 0.43352 | 0.60134 | 0.88670 |
| 0.88629 | 0.05938 | 0.76347 |
| 0.69958 | 0.50259 | 0.87046 |
| 0.81847 | 0.51572 | 0.91254 |
| 0.75386 | 0.45728 | 0.02123 |
| 0.76367 | 0.48076 | 0.89464 |
| 0.91297 | 0.00027 | 0.15319 |
| 0.50170 | 0.57015 | 0.00108 |
| 0.08866 | 0.00042 | 0.15947 |
| 0.58907 | 0.50004 | 0.15680 |
| 0.00249 | 0.06979 | 0.99867 |
| 0.50558 | 0.43188 | 0.99199 |
| 0.41471 | 0.49944 | 0.15610 |
| 0.41630 | 0.50095 | 0.83826 |
| 0.91588 | 0.00122 | 0.83598 |
| 0.09179 | 0.00026 | 0.84224 |
| 0.59329 | 0.50291 | 0.84017 |
| 0.00181 | 0.93123 | 0.99715 |

## POSCAR files for meoh solvent

### POSCAR file for gb\_solvent

POSCAR file from zrtepb-gb-meoh-c.res: C: 141 F: 1 H: 116 O: 66 P: 1 ZR: 12  
34.89200000000000

|                     |                     |                    |
|---------------------|---------------------|--------------------|
| 0.5792995890490465  | -0.0000450140396845 | 0.0007649282407427 |
| -0.0000781726227076 | 1.0082675674799713  | 0.0000166934211398 |
| 0.0004256087542374  | 0.0000053656439079  | 0.3214078049098053 |

141 1 116 66 1 12

Direct

|         |         |         |
|---------|---------|---------|
| 0.79241 | 0.88298 | 0.30290 |
| 0.23283 | 0.21726 | 0.56326 |
| 0.73099 | 0.71857 | 0.43334 |
| 0.70676 | 0.68618 | 0.36127 |
| 0.64528 | 0.68996 | 0.30521 |
| 0.61745 | 0.65966 | 0.24429 |
| 0.85509 | 0.81246 | 0.31282 |
| 0.74089 | 0.65174 | 0.34983 |
| 0.61573 | 0.59195 | 0.18317 |
| 0.64952 | 0.62447 | 0.24179 |
| 0.71167 | 0.62073 | 0.29409 |
| 0.88497 | 0.84232 | 0.25296 |
| 0.20628 | 0.18472 | 0.63220 |
| 0.23449 | 0.78393 | 0.56323 |
| 0.20821 | 0.81656 | 0.63199 |
| 0.14565 | 0.81232 | 0.68428 |
| 0.11602 | 0.84241 | 0.74362 |
| 0.24129 | 0.85127 | 0.64389 |
| 0.11285 | 0.90964 | 0.80754 |
| 0.14773 | 0.87763 | 0.74871 |
| 0.21078 | 0.88193 | 0.69970 |
| 0.76184 | 0.85266 | 0.36010 |
| 0.73065 | 0.28259 | 0.56355 |
| 0.14340 | 0.18844 | 0.68354 |
| 0.70250 | 0.31539 | 0.62969 |
| 0.63451 | 0.31479 | 0.65399 |
| 0.60392 | 0.34578 | 0.70685 |
| 0.88923 | 0.90969 | 0.19058 |
| 0.73920 | 0.34764 | 0.66043 |

|         |         |         |
|---------|---------|---------|
| 0.60562 | 0.41111 | 0.78904 |
| 0.64010 | 0.37877 | 0.73020 |
| 0.70784 | 0.37972 | 0.70631 |
| 0.85440 | 0.87791 | 0.25031 |
| 0.77450 | 0.21805 | 0.56255 |
| 0.11389 | 0.15794 | 0.74114 |
| 0.80337 | 0.18595 | 0.62825 |
| 0.86207 | 0.19116 | 0.69236 |
| 0.89218 | 0.16055 | 0.74785 |
| 0.77437 | 0.14977 | 0.62459 |
| 0.89771 | 0.09196 | 0.79834 |
| 0.86442 | 0.12426 | 0.73881 |
| 0.80502 | 0.11895 | 0.67804 |
| 0.23968 | 0.15008 | 0.64305 |
| 0.11202 | 0.09047 | 0.80462 |
| 0.14596 | 0.12280 | 0.74533 |
| 0.20921 | 0.11904 | 0.69677 |
| 0.72743 | 0.71856 | 0.55926 |
| 0.70089 | 0.68608 | 0.62709 |
| 0.26964 | 0.71729 | 0.56499 |
| 0.64694 | 0.69192 | 0.70391 |
| 0.61811 | 0.66171 | 0.76407 |
| 0.72599 | 0.64918 | 0.61484 |
| 0.60884 | 0.59246 | 0.80755 |
| 0.64158 | 0.62477 | 0.74616 |
| 0.69542 | 0.61873 | 0.67071 |
| 0.76394 | 0.78497 | 0.56273 |
| 0.78978 | 0.81705 | 0.63391 |
| 0.84736 | 0.81099 | 0.70061 |
| 0.87718 | 0.84070 | 0.76132 |
| 0.29485 | 0.68494 | 0.63519 |
| 0.76131 | 0.85330 | 0.63392 |
| 0.88660 | 0.90906 | 0.81265 |
| 0.79959 | 0.54009 | 0.74860 |
| 0.85058 | 0.87728 | 0.75484 |
| 0.90409 | 0.51364 | 0.03526 |
| 0.84830 | 0.54159 | 0.01735 |
| 0.83064 | 0.56364 | 0.12834 |
| 0.79195 | 0.88333 | 0.69224 |
| 0.75992 | 0.40934 | 0.07813 |
| 0.27300 | 0.28272 | 0.56101 |
| 0.30047 | 0.31512 | 0.62769 |
| 0.35788 | 0.30967 | 0.69541 |
| 0.38756 | 0.34008 | 0.75266 |
| 0.27215 | 0.35146 | 0.62275 |
| 0.39437 | 0.40871 | 0.80148 |
| 0.35231 | 0.69017 | 0.70304 |
| 0.36079 | 0.37656 | 0.74172 |
| 0.26926 | 0.28323 | 0.43533 |
| 0.30247 | 0.38212 | 0.67783 |
| 0.76665 | 0.21615 | 0.43755 |
| 0.79365 | 0.18360 | 0.36903 |
| 0.85781 | 0.18706 | 0.32298 |
| 0.29724 | 0.31552 | 0.36683 |
| 0.88762 | 0.15679 | 0.26481 |
| 0.75940 | 0.14943 | 0.35290 |
| 0.88909 | 0.08993 | 0.19573 |
| 0.38036 | 0.66004 | 0.76434 |
| 0.85460 | 0.12205 | 0.25531 |
| 0.79021 | 0.11852 | 0.29900 |
| 0.36132 | 0.31152 | 0.32076 |
| 0.26757 | 0.71659 | 0.43910 |
| 0.29338 | 0.68398 | 0.36982 |
| 0.35440 | 0.68862 | 0.31216 |
| 0.38359 | 0.65857 | 0.25197 |
| 0.26118 | 0.64885 | 0.36171 |
| 0.38796 | 0.59092 | 0.19187 |
| 0.35295 | 0.62297 | 0.25049 |
| 0.26482 | 0.64901 | 0.63477 |
| 0.29124 | 0.61833 | 0.30453 |
| 0.39247 | 0.34179 | 0.26470 |
| 0.23242 | 0.78321 | 0.43733 |
| 0.20708 | 0.81548 | 0.36708 |
| 0.15063 | 0.80981 | 0.29681 |
| 0.12204 | 0.83987 | 0.23604 |
| 0.23584 | 0.85172 | 0.37002 |
| 0.26436 | 0.35018 | 0.35218 |
| 0.11443 | 0.90843 | 0.18580 |
| 0.14906 | 0.87636 | 0.24489 |
| 0.38548 | 0.59173 | 0.81864 |
| 0.20673 | 0.88201 | 0.31073 |
| 0.39607 | 0.40922 | 0.20029 |
| 0.72287 | 0.28067 | 0.43843 |
| 0.69441 | 0.31262 | 0.37241 |
| 0.64249 | 0.30637 | 0.29188 |
| 0.61255 | 0.33674 | 0.23496 |
| 0.71712 | 0.34986 | 0.39112 |
| 0.60234 | 0.40619 | 0.19633 |



|         |         |         |
|---------|---------|---------|
| 0.63353 | 0.37382 | 0.25932 |
| 0.68605 | 0.38029 | 0.33747 |
| 0.35188 | 0.62387 | 0.75810 |
| 0.36088 | 0.37701 | 0.25771 |
| 0.29646 | 0.38109 | 0.30070 |
| 0.74092 | 0.24747 | 0.37796 |
| 0.24910 | 0.74950 | 0.37849 |
| 0.25484 | 0.24970 | 0.62228 |
| 0.74414 | 0.75177 | 0.62062 |
| 0.25322 | 0.75105 | 0.62382 |
| 0.75696 | 0.25138 | 0.62302 |
| 0.75012 | 0.75187 | 0.37543 |
| 0.24684 | 0.25086 | 0.37636 |
| 0.29349 | 0.61859 | 0.69414 |
| 0.76651 | 0.78507 | 0.43693 |
| 0.22872 | 0.21783 | 0.43764 |
| 0.20078 | 0.18540 | 0.37159 |
| 0.14129 | 0.19045 | 0.30966 |
| 0.11104 | 0.15992 | 0.25402 |
| 0.23042 | 0.14940 | 0.37249 |
| 0.10539 | 0.09147 | 0.20219 |
| 0.13929 | 0.12372 | 0.26099 |
| 0.19951 | 0.11858 | 0.31925 |
| 0.79369 | 0.81745 | 0.36894 |
| 0.81098 | 0.47135 | 0.83027 |
| 0.79267 | 0.34802 | 0.64391 |
| 0.55125 | 0.34516 | 0.72979 |
| 0.60572 | 0.28952 | 0.63031 |
| 0.73615 | 0.59299 | 0.29167 |
| 0.23534 | 0.90960 | 0.70654 |
| 0.29150 | 0.85430 | 0.60835 |
| 0.06733 | 0.83950 | 0.78554 |
| 0.11997 | 0.78502 | 0.67593 |
| 0.79073 | 0.64917 | 0.38692 |
| 0.28149 | 0.41077 | 0.67301 |
| 0.22560 | 0.35545 | 0.57502 |
| 0.43238 | 0.33648 | 0.80605 |
| 0.56960 | 0.66223 | 0.19963 |
| 0.37980 | 0.28123 | 0.69992 |
| 0.73652 | 0.24657 | 0.28058 |
| 0.61889 | 0.71707 | 0.31214 |
| 0.77121 | 0.91206 | 0.68874 |
| 0.71480 | 0.85804 | 0.58671 |
| 0.92249 | 0.83648 | 0.81287 |
| 0.86956 | 0.78257 | 0.70144 |
| 0.24839 | 0.74907 | 0.28073 |
| 0.71167 | 0.58953 | 0.65486 |
| 0.76981 | 0.64440 | 0.55990 |
| 0.57599 | 0.66585 | 0.82415 |
| 0.62682 | 0.72068 | 0.71356 |
| 0.23406 | 0.09143 | 0.70139 |
| 0.28993 | 0.14736 | 0.60749 |
| 0.06498 | 0.16043 | 0.78246 |
| 0.11734 | 0.21563 | 0.67583 |
| 0.70250 | 0.40956 | 0.35206 |
| 0.75992 | 0.35458 | 0.44840 |
| 0.57229 | 0.33267 | 0.17116 |
| 0.62493 | 0.27729 | 0.27707 |
| 0.22784 | 0.91062 | 0.31576 |
| 0.28160 | 0.85607 | 0.41982 |
| 0.07743 | 0.83604 | 0.18229 |
| 0.12824 | 0.78146 | 0.29368 |
| 0.26742 | 0.59039 | 0.30189 |
| 0.21203 | 0.64543 | 0.40134 |
| 0.43129 | 0.66173 | 0.20671 |
| 0.37939 | 0.71621 | 0.31744 |
| 0.74232 | 0.75158 | 0.71837 |
| 0.76471 | 0.09120 | 0.29058 |
| 0.70839 | 0.14689 | 0.38505 |
| 0.93745 | 0.15912 | 0.22709 |
| 0.88451 | 0.21390 | 0.33478 |
| 0.25706 | 0.24959 | 0.71996 |
| 0.22148 | 0.09014 | 0.32127 |
| 0.27840 | 0.14574 | 0.41571 |
| 0.06463 | 0.16323 | 0.20510 |
| 0.11831 | 0.21865 | 0.30840 |
| 0.71579 | 0.51748 | 0.15564 |
| 0.57568 | 0.49651 | 0.57830 |
| 0.28717 | 0.52263 | 0.86264 |
| 0.41964 | 0.49831 | 0.41983 |
| 0.51027 | 0.49825 | 0.35703 |
| 0.57779 | 0.46955 | 0.36060 |
| 0.49466 | 0.50074 | 0.64448 |
| 0.42023 | 0.47263 | 0.63527 |
| 0.36229 | 0.44475 | 0.00205 |
| 0.50181 | 0.55359 | 0.25475 |
| 0.50013 | 0.55491 | 0.74834 |
| 0.64688 | 0.44795 | 0.99411 |

|         |         |          |
|---------|---------|----------|
| 0.30474 | 0.50102 | 0.01564  |
| 0.29641 | 0.52649 | 0.14243  |
| 0.08078 | 0.02476 | 0.37827  |
| 0.21747 | 0.02188 | 0.86303  |
| 0.19742 | 0.99904 | 0.00305  |
| 0.99632 | 0.00188 | 0.35556  |
| 0.78424 | 0.02130 | 0.13514  |
| 0.80471 | 0.99923 | 0.99545  |
| 0.92201 | 0.02554 | 0.62087  |
| 0.00589 | 0.00226 | 0.64311  |
| 0.13868 | 0.05523 | 0.00652  |
| 0.86350 | 0.05528 | 0.99310  |
| 0.00135 | 0.94453 | 0.24971  |
| 0.00062 | 0.94481 | 0.74851  |
| 0.21120 | 0.97560 | 0.13922  |
| 0.92230 | 0.99088 | 0.41895  |
| 0.79083 | 0.97664 | 0.85697  |
| 0.07990 | 0.99051 | 0.58067  |
| 0.27213 | 0.40878 | 0.29273  |
| 0.21323 | 0.35307 | 0.38332  |
| 0.44223 | 0.33898 | 0.22699  |
| 0.38691 | 0.28427 | 0.33116  |
| 0.76180 | 0.25229 | 0.72032  |
| 0.76887 | 0.91096 | 0.29754  |
| 0.71241 | 0.85617 | 0.39847  |
| 0.93296 | 0.83902 | 0.20876  |
| 0.87973 | 0.78479 | 0.31923  |
| 0.25414 | 0.75153 | 0.72157  |
| 0.27143 | 0.59019 | 0.69091  |
| 0.21821 | 0.64505 | 0.58719  |
| 0.42562 | 0.66357 | 0.81651  |
| 0.37575 | 0.71825 | 0.70429  |
| 0.75226 | 0.75211 | 0.27773  |
| 0.78349 | 0.09042 | 0.67448  |
| 0.72696 | 0.14610 | 0.57937  |
| 0.93808 | 0.16385 | 0.79830  |
| 0.88469 | 0.21945 | 0.69530  |
| 0.24456 | 0.25098 | 0.27869  |
| 0.73569 | 0.40567 | 0.72599  |
| 0.78236 | 0.53082 | 0.66015  |
| 0.77956 | 0.56860 | 0.76733  |
| 0.85406 | 0.54068 | 0.74949  |
| 0.91488 | 0.49730 | -0.04635 |
| 0.89144 | 0.49344 | 0.10698  |
| 0.94938 | 0.52904 | 0.06107  |
| 0.86028 | 0.56163 | -0.05576 |
| 0.87313 | 0.58090 | 0.15758  |
| 0.81742 | 0.54391 | 0.20121  |
| 0.78856 | 0.58283 | 0.11199  |
| 0.72131 | 0.39154 | 0.12230  |
| 0.71976 | 0.46268 | 0.08940  |
| 0.79672 | 0.41972 | 1.14784  |
| 0.78173 | 0.39129 | 1.00339  |
| 0.43981 | 0.39992 | 0.12393  |
| 0.93834 | 0.10113 | 0.87978  |
| 0.36766 | 0.55789 | 0.79374  |
| 0.56417 | 0.60163 | 0.88217  |
| 0.13064 | 0.05668 | 0.78062  |
| 0.06647 | 0.09967 | 0.87747  |
| 0.62673 | 0.55877 | 0.78180  |
| 0.43572 | 0.39951 | 0.88158  |
| 0.86970 | 0.94308 | 0.78790  |
| 0.93368 | 0.89997 | 0.11607  |
| 0.38011 | 0.44297 | 0.22953  |
| 0.93355 | 0.89954 | 0.88172  |
| 0.37983 | 0.44254 | 0.77056  |
| 0.43566 | 0.60028 | 0.12399  |
| 0.87035 | 0.05608 | 0.21866  |
| 0.93505 | 0.09941 | 0.12426  |
| 0.36969 | 0.55698 | 0.21422  |
| 0.87378 | 0.94362 | 0.21856  |
| 0.56721 | 0.39738 | 0.10680  |
| 0.13207 | 0.94234 | 0.21041  |
| 0.06780 | 0.89917 | 0.11575  |
| 0.61412 | 0.43958 | 0.23331  |
| 0.19318 | 0.99961 | 0.10968  |
| 0.94190 | 0.00244 | 0.34802  |
| 0.69337 | 0.49310 | 0.16470  |
| 0.44437 | 0.50267 | 0.34642  |
| 0.80724 | 0.99892 | 0.10482  |
| 0.06439 | 0.00038 | 0.34828  |
| 0.30883 | 0.50101 | 0.11496  |
| 0.56540 | 0.49639 | 0.35001  |
| 0.80913 | 0.00040 | 0.88783  |
| 0.06042 | 0.00266 | 0.65071  |
| 0.30772 | 0.49973 | 0.89501  |
| 0.55338 | 0.50448 | 0.65136  |
| 0.19467 | 0.99932 | 0.89257  |

|         |          |          |
|---------|----------|----------|
| 0.93804 | 0.00101  | 0.65026  |
| 0.43351 | 0.49875  | 0.65417  |
| 0.00195 | 0.96080  | 0.17948  |
| 0.50266 | 0.47025  | 0.13115  |
| 0.99922 | 0.02911  | 0.13404  |
| 0.50430 | 0.53883  | 0.18132  |
| 0.00012 | 0.96109  | 0.81871  |
| 0.50017 | 0.47161  | 0.86631  |
| 0.00302 | 0.02937  | 0.86583  |
| 0.49778 | 0.53975  | 0.82100  |
| 0.07442 | 0.97077  | -0.00134 |
| 0.60384 | 0.46225  | 0.99450  |
| 0.90247 | 0.03905  | 0.99470  |
| 0.42892 | 0.52901  | 0.00465  |
| 0.92755 | 0.97083  | -0.00035 |
| 0.40118 | 0.46111  | 0.00155  |
| 0.09973 | 0.03898  | 0.00493  |
| 0.57661 | 0.53025  | 0.99662  |
| 0.56816 | 0.60116  | 0.11520  |
| 0.12028 | 0.05768  | 0.23289  |
| 0.06370 | 0.10070  | 0.12246  |
| 0.63507 | 0.55827  | 0.20526  |
| 0.56313 | 0.40112  | 0.86647  |
| 0.12843 | 0.94355  | 0.77968  |
| 0.06796 | 0.90000  | 0.88148  |
| 0.62046 | 0.44495  | 0.76006  |
| 0.43118 | 0.60091  | 0.89064  |
| 0.88315 | 0.05826  | 0.76637  |
| 0.69694 | 0.49942  | 0.84712  |
| 0.78773 | 0.52151  | 0.98392  |
| 0.72903 | 0.44133  | 0.02539  |
| 0.76810 | 0.50765  | 0.85617  |
| 0.91215 | -0.00041 | 0.15554  |
| 0.91437 | 0.00025  | 0.83853  |
| 0.41029 | 0.50065  | 0.84613  |
| 0.41625 | 0.49918  | 0.16359  |
| 0.50207 | 0.43111  | -0.00305 |
| 0.00114 | 0.06894  | 0.00040  |
| 0.59120 | 0.49999  | 0.15393  |
| 0.08790 | -0.00011 | 0.16016  |
| 0.50071 | 0.56940  | 0.00212  |
| 0.09000 | -0.00021 | 0.84304  |
| 0.58559 | 0.50073  | 0.83769  |
| 0.00094 | 0.93069  | -0.00135 |

## POSCAR file for gb\_p5

POSCAR file from zrtepb-gb-meoh-c.res: C: 141 F: 1 H: 116 O: 66 P: 1 ZR: 12  
 34.8920000000000

|                     |                     |                    |
|---------------------|---------------------|--------------------|
| 0.5792995890490465  | -0.0000450140396845 | 0.0007649282407427 |
| -0.0000781726227076 | 1.0082675674799713  | 0.0000166934211398 |
| 0.0004256087542374  | 0.0000053656439079  | 0.3214078049098053 |

141 1 116 66 1 12

Direct

|         |         |         |
|---------|---------|---------|
| 0.79262 | 0.88305 | 0.30283 |
| 0.23321 | 0.21729 | 0.56198 |
| 0.73143 | 0.71852 | 0.43318 |
| 0.70687 | 0.68600 | 0.36191 |
| 0.64493 | 0.68971 | 0.30748 |
| 0.61683 | 0.65944 | 0.24682 |
| 0.85533 | 0.81245 | 0.31045 |
| 0.74101 | 0.65159 | 0.34976 |
| 0.61489 | 0.59197 | 0.18393 |
| 0.64918 | 0.62435 | 0.24252 |
| 0.71170 | 0.62066 | 0.29360 |
| 0.88503 | 0.84247 | 0.25105 |
| 0.20656 | 0.18474 | 0.63088 |
| 0.23456 | 0.78429 | 0.56240 |
| 0.20822 | 0.81693 | 0.63114 |
| 0.14539 | 0.81273 | 0.68243 |
| 0.11565 | 0.84274 | 0.74193 |
| 0.24145 | 0.85156 | 0.64430 |
| 0.11272 | 0.90987 | 0.80722 |
| 0.14756 | 0.87790 | 0.74818 |
| 0.21086 | 0.88218 | 0.70019 |
| 0.76227 | 0.85260 | 0.35967 |
| 0.72979 | 0.28343 | 0.55975 |
| 0.14350 | 0.18841 | 0.68156 |
| 0.70168 | 0.31668 | 0.62402 |
| 0.63455 | 0.31544 | 0.65513 |
| 0.60421 | 0.34659 | 0.70778 |
| 0.88910 | 0.90997 | 0.19004 |
| 0.73745 | 0.34998 | 0.64648 |
| 0.60612 | 0.41268 | 0.78536 |
| 0.63947 | 0.38037 | 0.72408 |
| 0.70605 | 0.38214 | 0.69176 |
| 0.85447 | 0.87810 | 0.24960 |

|         |         |         |
|---------|---------|---------|
| 0.77280 | 0.21853 | 0.56171 |
| 0.11400 | 0.15799 | 0.73958 |
| 0.80165 | 0.18644 | 0.62816 |
| 0.86006 | 0.19177 | 0.69312 |
| 0.89068 | 0.16123 | 0.74826 |
| 0.77358 | 0.15001 | 0.62347 |
| 0.89752 | 0.09244 | 0.79746 |
| 0.86384 | 0.12472 | 0.73818 |
| 0.80475 | 0.11924 | 0.67645 |
| 0.24016 | 0.15016 | 0.64291 |
| 0.11227 | 0.09066 | 0.80437 |
| 0.14628 | 0.12292 | 0.74490 |
| 0.20973 | 0.11920 | 0.69705 |
| 0.72716 | 0.71897 | 0.55904 |
| 0.70013 | 0.68688 | 0.62771 |
| 0.26908 | 0.71757 | 0.56436 |
| 0.64597 | 0.69349 | 0.70348 |
| 0.61617 | 0.66369 | 0.76402 |
| 0.72532 | 0.64989 | 0.61832 |
| 0.60540 | 0.59455 | 0.80810 |
| 0.63955 | 0.62663 | 0.74845 |
| 0.69461 | 0.61989 | 0.67628 |
| 0.76393 | 0.78531 | 0.56145 |
| 0.78979 | 0.81745 | 0.63244 |
| 0.84716 | 0.81129 | 0.69968 |
| 0.87700 | 0.84093 | 0.76072 |
| 0.29369 | 0.68514 | 0.63475 |
| 0.76145 | 0.85376 | 0.63257 |
| 0.88661 | 0.90932 | 0.81216 |
| 0.79436 | 0.53295 | 0.76956 |
| 0.85060 | 0.87758 | 0.75412 |
| 0.91843 | 0.52890 | 0.01828 |
| 0.84883 | 0.54434 | 0.00653 |
| 0.82664 | 0.56634 | 0.11549 |
| 0.79209 | 0.88372 | 0.69123 |
| 0.78082 | 0.42746 | 0.02813 |
| 0.27346 | 0.28273 | 0.55998 |
| 0.30059 | 0.31511 | 0.62700 |
| 0.35729 | 0.30957 | 0.69655 |
| 0.38689 | 0.34002 | 0.75368 |
| 0.27262 | 0.35152 | 0.62056 |
| 0.39446 | 0.40878 | 0.80004 |
| 0.35107 | 0.69013 | 0.70297 |
| 0.36060 | 0.37657 | 0.74115 |
| 0.26987 | 0.28336 | 0.43428 |
| 0.30277 | 0.38220 | 0.67588 |
| 0.76637 | 0.21657 | 0.43648 |
| 0.79372 | 0.18386 | 0.36900 |
| 0.85835 | 0.18712 | 0.32495 |
| 0.29812 | 0.31568 | 0.36605 |
| 0.88829 | 0.15686 | 0.26697 |
| 0.75925 | 0.14983 | 0.35139 |
| 0.88923 | 0.09022 | 0.19572 |
| 0.37844 | 0.65986 | 0.76462 |
| 0.85490 | 0.12228 | 0.25568 |
| 0.79014 | 0.11891 | 0.29776 |
| 0.36270 | 0.31187 | 0.32212 |
| 0.26670 | 0.71676 | 0.43851 |
| 0.29223 | 0.68394 | 0.36981 |
| 0.35374 | 0.68816 | 0.31353 |
| 0.38290 | 0.65782 | 0.25476 |
| 0.25960 | 0.64894 | 0.36184 |
| 0.38674 | 0.59024 | 0.19503 |
| 0.35182 | 0.62233 | 0.25359 |
| 0.26306 | 0.64939 | 0.63413 |
| 0.28970 | 0.61810 | 0.30637 |
| 0.39391 | 0.34207 | 0.26565 |
| 0.23214 | 0.78347 | 0.43656 |
| 0.20682 | 0.81577 | 0.36645 |
| 0.15084 | 0.81005 | 0.29504 |
| 0.12227 | 0.84013 | 0.23430 |
| 0.23516 | 0.85211 | 0.37062 |
| 0.26498 | 0.35017 | 0.34946 |
| 0.11417 | 0.90877 | 0.18556 |
| 0.14879 | 0.87671 | 0.24450 |
| 0.38259 | 0.59166 | 0.81935 |
| 0.20603 | 0.88244 | 0.31153 |
| 0.39690 | 0.40928 | 0.19803 |
| 0.72412 | 0.28150 | 0.43432 |
| 0.69760 | 0.31362 | 0.36573 |
| 0.64394 | 0.30791 | 0.28880 |
| 0.61550 | 0.33844 | 0.23016 |
| 0.72403 | 0.35033 | 0.37774 |
| 0.60701 | 0.40760 | 0.18880 |
| 0.63988 | 0.37520 | 0.24859 |
| 0.69482 | 0.38104 | 0.32135 |
| 0.34937 | 0.62384 | 0.75833 |
| 0.36192 | 0.37710 | 0.25635 |

|         |         |         |
|---------|---------|---------|
| 0.29714 | 0.38104 | 0.29776 |
| 0.74208 | 0.24802 | 0.37534 |
| 0.24837 | 0.74967 | 0.37773 |
| 0.25521 | 0.24971 | 0.62116 |
| 0.74379 | 0.75230 | 0.61988 |
| 0.25318 | 0.75142 | 0.62315 |
| 0.75456 | 0.25202 | 0.62086 |
| 0.75122 | 0.75159 | 0.37465 |
| 0.24727 | 0.25104 | 0.37517 |
| 0.29108 | 0.61883 | 0.69382 |
| 0.76715 | 0.78500 | 0.43562 |
| 0.22912 | 0.21797 | 0.43637 |
| 0.20115 | 0.18553 | 0.37040 |
| 0.14187 | 0.19062 | 0.30790 |
| 0.11150 | 0.16006 | 0.25262 |
| 0.23052 | 0.14945 | 0.37218 |
| 0.10540 | 0.09157 | 0.20195 |
| 0.13942 | 0.12379 | 0.26053 |
| 0.19948 | 0.11860 | 0.31934 |
| 0.79417 | 0.81736 | 0.36749 |
| 0.80221 | 0.46434 | 0.79838 |
| 0.79038 | 0.35097 | 0.62530 |
| 0.55240 | 0.34546 | 0.73631 |
| 0.60619 | 0.28953 | 0.63724 |
| 0.73678 | 0.59311 | 0.28986 |
| 0.23556 | 0.90977 | 0.70786 |
| 0.29187 | 0.85454 | 0.60974 |
| 0.06675 | 0.83980 | 0.78301 |
| 0.11959 | 0.78550 | 0.67317 |
| 0.79092 | 0.64891 | 0.38648 |
| 0.28210 | 0.41090 | 0.67004 |
| 0.22650 | 0.35557 | 0.57152 |
| 0.43140 | 0.33640 | 0.80789 |
| 0.56858 | 0.66198 | 0.20356 |
| 0.37886 | 0.28105 | 0.70221 |
| 0.73883 | 0.24699 | 0.27781 |
| 0.61836 | 0.71674 | 0.31542 |
| 0.77137 | 0.91244 | 0.68783 |
| 0.71490 | 0.85856 | 0.58554 |
| 0.92211 | 0.83654 | 0.81266 |
| 0.86915 | 0.78283 | 0.70084 |
| 0.24745 | 0.74919 | 0.27997 |
| 0.71227 | 0.59066 | 0.66629 |
| 0.76959 | 0.64471 | 0.56480 |
| 0.57349 | 0.66825 | 0.82255 |
| 0.62639 | 0.72243 | 0.71141 |
| 0.23479 | 0.09167 | 0.70252 |
| 0.29056 | 0.14748 | 0.60802 |
| 0.06491 | 0.16052 | 0.78019 |
| 0.11726 | 0.21552 | 0.67306 |
| 0.71383 | 0.40998 | 0.33248 |
| 0.76803 | 0.35454 | 0.43249 |
| 0.57321 | 0.33479 | 0.17050 |
| 0.62354 | 0.27923 | 0.27863 |
| 0.22689 | 0.91109 | 0.31754 |
| 0.28065 | 0.85651 | 0.42120 |
| 0.07801 | 0.83618 | 0.17972 |
| 0.12881 | 0.78162 | 0.29082 |
| 0.26544 | 0.59028 | 0.30385 |
| 0.21010 | 0.64584 | 0.40029 |
| 0.43088 | 0.66069 | 0.21026 |
| 0.37908 | 0.71564 | 0.31867 |
| 0.74161 | 0.75228 | 0.71761 |
| 0.76434 | 0.09172 | 0.28805 |
| 0.70793 | 0.14744 | 0.38200 |
| 0.93848 | 0.15912 | 0.23082 |
| 0.88525 | 0.21383 | 0.33800 |
| 0.25730 | 0.24961 | 0.71886 |
| 0.22134 | 0.09013 | 0.32203 |
| 0.27841 | 0.14578 | 0.41573 |
| 0.06519 | 0.16346 | 0.20347 |
| 0.11912 | 0.21888 | 0.30584 |
| 0.71544 | 0.52266 | 0.14616 |
| 0.57454 | 0.50080 | 0.57096 |
| 0.28743 | 0.52319 | 0.86503 |
| 0.42498 | 0.50044 | 0.42849 |
| 0.50077 | 0.49857 | 0.35716 |
| 0.58346 | 0.47199 | 0.36397 |
| 0.49917 | 0.50157 | 0.64108 |
| 0.41709 | 0.47357 | 0.63269 |
| 0.36245 | 0.44478 | 0.00014 |
| 0.50095 | 0.55388 | 0.25479 |
| 0.49831 | 0.55614 | 0.74825 |
| 0.64869 | 0.45234 | 0.98287 |
| 0.30441 | 0.50058 | 0.00305 |
| 0.29228 | 0.52423 | 0.14335 |
| 0.08061 | 0.02493 | 0.37840 |
| 0.21765 | 0.02193 | 0.86291 |

|         |         |         |
|---------|---------|---------|
| 0.19734 | 0.99913 | 0.00381 |
| 0.99605 | 0.00208 | 0.35564 |
| 0.78422 | 0.02162 | 0.13488 |
| 0.80472 | 0.99953 | 0.99490 |
| 0.92202 | 0.02587 | 0.62056 |
| 0.00605 | 0.00254 | 0.64277 |
| 0.13870 | 0.05546 | 0.00636 |
| 0.86346 | 0.05575 | 0.99249 |
| 0.00108 | 0.94481 | 0.24948 |
| 0.00051 | 0.94504 | 0.74827 |
| 0.21095 | 0.97569 | 0.13933 |
| 0.92187 | 0.99115 | 0.41864 |
| 0.79087 | 0.97685 | 0.85669 |
| 0.08007 | 0.99057 | 0.58087 |
| 0.27249 | 0.40859 | 0.28827 |
| 0.21357 | 0.35300 | 0.37920 |
| 0.44404 | 0.33930 | 0.22946 |
| 0.38862 | 0.28480 | 0.33428 |
| 0.75809 | 0.25309 | 0.71836 |
| 0.76894 | 0.91100 | 0.29813 |
| 0.71289 | 0.85596 | 0.39835 |
| 0.93291 | 0.83921 | 0.20644 |
| 0.87995 | 0.78476 | 0.31585 |
| 0.25424 | 0.75191 | 0.72090 |
| 0.26854 | 0.59055 | 0.69043 |
| 0.21654 | 0.64566 | 0.58610 |
| 0.42370 | 0.66313 | 0.81695 |
| 0.37504 | 0.71806 | 0.70410 |
| 0.75378 | 0.75158 | 0.27696 |
| 0.78370 | 0.09060 | 0.67174 |
| 0.72647 | 0.14601 | 0.57748 |
| 0.93638 | 0.16487 | 0.79911 |
| 0.88215 | 0.22019 | 0.69712 |
| 0.24506 | 0.25119 | 0.27748 |
| 0.73301 | 0.40887 | 0.70424 |
| 0.77207 | 0.52562 | 0.68307 |
| 0.77534 | 0.56114 | 0.79554 |
| 0.84854 | 0.53413 | 0.75851 |
| 0.93161 | 0.51113 | 0.94078 |
| 0.92272 | 0.51137 | 0.09949 |
| 0.95451 | 0.55233 | 0.02445 |
| 0.84557 | 0.56288 | 0.92749 |
| 0.86142 | 0.58970 | 0.13466 |
| 0.82515 | 0.54747 | 0.19426 |
| 0.77725 | 0.57896 | 0.10211 |
| 0.74259 | 0.41038 | 0.07494 |
| 0.71781 | 0.48098 | 0.08082 |
| 0.81718 | 0.43817 | 1.09810 |
| 0.80459 | 0.40867 | 0.95720 |
| 0.44033 | 0.40003 | 0.12112 |
| 0.93830 | 0.10155 | 0.87882 |
| 0.36500 | 0.55778 | 0.79423 |
| 0.56142 | 0.60359 | 0.88474 |
| 0.13082 | 0.05684 | 0.78057 |
| 0.06668 | 0.09989 | 0.87710 |
| 0.62136 | 0.56102 | 0.77827 |
| 0.43660 | 0.39967 | 0.87897 |
| 0.86978 | 0.94335 | 0.78750 |
| 0.93355 | 0.90031 | 0.11543 |
| 0.38073 | 0.44303 | 0.22712 |
| 0.93349 | 0.89977 | 0.88134 |
| 0.37954 | 0.44259 | 0.76948 |
| 0.43338 | 0.59981 | 0.12515 |
| 0.87046 | 0.05634 | 0.21829 |
| 0.93513 | 0.09967 | 0.12405 |
| 0.36942 | 0.55618 | 0.21883 |
| 0.87360 | 0.94388 | 0.21807 |
| 0.56801 | 0.39876 | 0.10470 |
| 0.13173 | 0.94269 | 0.21022 |
| 0.06754 | 0.89955 | 0.11541 |
| 0.61976 | 0.44113 | 0.22449 |
| 0.19307 | 0.99970 | 0.10957 |
| 0.94167 | 0.00267 | 0.34784 |
| 0.69688 | 0.49701 | 0.15010 |
| 0.44618 | 0.50099 | 0.35011 |
| 0.80725 | 0.99926 | 0.10445 |
| 0.06411 | 0.00062 | 0.34813 |
| 0.30924 | 0.50010 | 0.11258 |
| 0.56790 | 0.49771 | 0.34527 |
| 0.80919 | 0.00062 | 0.88749 |
| 0.06052 | 0.00292 | 0.65051 |
| 0.30668 | 0.49963 | 0.89554 |
| 0.55298 | 0.50522 | 0.64776 |
| 0.19455 | 0.99947 | 0.89244 |
| 0.93810 | 0.00136 | 0.64997 |
| 0.43097 | 0.49954 | 0.65219 |
| 0.00169 | 0.96111 | 0.17932 |
| 0.50188 | 0.47067 | 0.12930 |

|         |         |          |
|---------|---------|----------|
| 0.99908 | 0.02939 | 0.13334  |
| 0.50213 | 0.53883 | 0.18187  |
| 0.00007 | 0.96136 | 0.81837  |
| 0.50086 | 0.47248 | 0.86495  |
| 0.00305 | 0.02966 | 0.86573  |
| 0.49625 | 0.54065 | 0.82022  |
| 0.07428 | 0.97104 | 0.99845  |
| 0.60405 | 0.46350 | 0.99420  |
| 0.90234 | 0.03945 | 0.99413  |
| 0.42754 | 0.52912 | 0.00353  |
| 0.92753 | 0.97120 | -0.00076 |
| 0.40127 | 0.46120 | -0.00113 |
| 0.09973 | 0.03923 | 0.00472  |
| 0.57434 | 0.53120 | 0.99759  |
| 0.56615 | 0.60118 | 0.11879  |
| 0.12014 | 0.05776 | 0.23270  |
| 0.06370 | 0.10079 | 0.12223  |
| 0.63478 | 0.55817 | 0.20368  |
| 0.56411 | 0.40244 | 0.86378  |
| 0.12835 | 0.94378 | 0.77955  |
| 0.06783 | 0.90023 | 0.88115  |
| 0.62158 | 0.44662 | 0.75904  |
| 0.42798 | 0.60092 | 0.89186  |
| 0.88319 | 0.05867 | 0.76564  |
| 0.69162 | 0.50433 | 0.85875  |
| 0.80398 | 0.51261 | 0.99414  |
| 0.74148 | 0.45787 | 0.97649  |
| 0.76549 | 0.49686 | 0.87628  |
| 0.91198 | 0.99994 | 0.15528  |
| 0.91435 | 0.00065 | 0.83804  |
| 0.41128 | 0.50062 | 0.84252  |
| 0.41392 | 0.49939 | 0.15961  |
| 0.50259 | 0.43159 | 0.99357  |
| 0.00104 | 0.06938 | -0.00013 |
| 0.58797 | 0.50026 | 0.15525  |
| 0.08767 | 0.00018 | 0.16005  |
| 0.49892 | 0.57002 | 0.00217  |
| 0.09011 | 0.00007 | 0.84287  |
| 0.58752 | 0.50275 | 0.83788  |
| 0.00080 | 0.93097 | 0.99830  |

## POSCAR file for gb\_p5\_prime

POSCAR file from zrtcpb-gb-meoh-c.res: C: 141 F: 1 H: 116 O: 66 P: 1 ZR: 12  
 34.89200000000000  
 0.5792995890490465 -0.0000450140396845 0.0007649282407427  
 -0.0000781726227076 1.0082675674799713 0.0000166934211398  
 0.0004256087542374 0.0000053656439079 0.3214078049098053

141 1 116 66 1 12

Direct

|         |         |         |
|---------|---------|---------|
| 0.79256 | 0.88312 | 0.30281 |
| 0.23358 | 0.21729 | 0.56195 |
| 0.73117 | 0.71862 | 0.43384 |
| 0.70636 | 0.68612 | 0.36276 |
| 0.64411 | 0.68981 | 0.30948 |
| 0.61591 | 0.65958 | 0.24884 |
| 0.85522 | 0.81252 | 0.31044 |
| 0.74070 | 0.65183 | 0.34940 |
| 0.61407 | 0.59227 | 0.18472 |
| 0.64854 | 0.62460 | 0.24313 |
| 0.71140 | 0.62097 | 0.29287 |
| 0.88488 | 0.84252 | 0.25086 |
| 0.20684 | 0.18476 | 0.63087 |
| 0.23430 | 0.78444 | 0.56221 |
| 0.20805 | 0.81711 | 0.63090 |
| 0.14484 | 0.81309 | 0.68075 |
| 0.11522 | 0.84312 | 0.74040 |
| 0.24176 | 0.85154 | 0.64542 |
| 0.11275 | 0.91007 | 0.80693 |
| 0.14762 | 0.87811 | 0.74795 |
| 0.21126 | 0.88222 | 0.70126 |
| 0.76227 | 0.85269 | 0.35984 |
| 0.73096 | 0.28391 | 0.56008 |
| 0.14340 | 0.18835 | 0.68001 |
| 0.70316 | 0.31707 | 0.62520 |
| 0.63543 | 0.31650 | 0.65180 |
| 0.60544 | 0.34743 | 0.70615 |
| 0.88895 | 0.91002 | 0.18966 |
| 0.74008 | 0.34938 | 0.65478 |
| 0.60755 | 0.41257 | 0.78952 |
| 0.64191 | 0.38034 | 0.72954 |
| 0.70941 | 0.38133 | 0.70328 |
| 0.85434 | 0.87816 | 0.24932 |
| 0.77350 | 0.21895 | 0.56170 |
| 0.11380 | 0.15796 | 0.73801 |
| 0.80182 | 0.18681 | 0.62833 |
| 0.85947 | 0.19218 | 0.69540 |

|         |         |          |
|---------|---------|----------|
| 0.88979 | 0.16159 | 0.75076  |
| 0.77399 | 0.15034 | 0.62206  |
| 0.89718 | 0.09270 | 0.79761  |
| 0.86338 | 0.12503 | 0.73888  |
| 0.80485 | 0.11956 | 0.67541  |
| 0.24070 | 0.15032 | 0.64424  |
| 0.11226 | 0.09079 | 0.80417  |
| 0.14638 | 0.12301 | 0.74469  |
| 0.21016 | 0.11935 | 0.69826  |
| 0.72716 | 0.71902 | 0.55966  |
| 0.70031 | 0.68688 | 0.62851  |
| 0.26871 | 0.71772 | 0.56463  |
| 0.64604 | 0.69340 | 0.70404  |
| 0.61641 | 0.66360 | 0.76484  |
| 0.72579 | 0.64993 | 0.61973  |
| 0.60576 | 0.59453 | 0.80958  |
| 0.64011 | 0.62658 | 0.75003  |
| 0.69538 | 0.61994 | 0.67829  |
| 0.76389 | 0.78539 | 0.56169  |
| 0.78965 | 0.81757 | 0.63262  |
| 0.84705 | 0.81143 | 0.69978  |
| 0.87687 | 0.84111 | 0.76068  |
| 0.29330 | 0.68529 | 0.63508  |
| 0.76125 | 0.85386 | 0.63266  |
| 0.88653 | 0.90950 | 0.81175  |
| 0.82938 | 0.46434 | 0.78698  |
| 0.85044 | 0.87775 | 0.75397  |
| 0.90505 | 0.55728 | -0.15960 |
| 0.83608 | 0.55044 | -0.20701 |
| 0.79924 | 0.58684 | -0.23522 |
| 0.79189 | 0.88387 | 0.69115  |
| 0.85510 | 0.48528 | 0.09456  |
| 0.27412 | 0.28266 | 0.55998  |
| 0.30127 | 0.31508 | 0.62673  |
| 0.35735 | 0.30956 | 0.69787  |
| 0.38687 | 0.34007 | 0.75478  |
| 0.27381 | 0.35159 | 0.61845  |
| 0.39475 | 0.40894 | 0.79953  |
| 0.35050 | 0.69034 | 0.70372  |
| 0.36108 | 0.37669 | 0.74055  |
| 0.27031 | 0.28329 | 0.43435  |
| 0.30385 | 0.38231 | 0.67363  |
| 0.76685 | 0.21697 | 0.43652  |
| 0.79407 | 0.18420 | 0.36910  |
| 0.85920 | 0.18708 | 0.32725  |
| 0.29842 | 0.31563 | 0.36608  |
| 0.88903 | 0.15676 | 0.26937  |
| 0.75906 | 0.15046 | 0.34965  |
| 0.88913 | 0.09038 | 0.19571  |
| 0.37790 | 0.66011 | 0.76539  |
| 0.85500 | 0.12246 | 0.25611  |
| 0.78982 | 0.11943 | 0.29629  |
| 0.36355 | 0.31225 | 0.32463  |
| 0.26638 | 0.71687 | 0.43882  |
| 0.29186 | 0.68398 | 0.37040  |
| 0.35365 | 0.68804 | 0.31502  |
| 0.38265 | 0.65766 | 0.25632  |
| 0.25889 | 0.64912 | 0.36182  |
| 0.38591 | 0.59022 | 0.19545  |
| 0.35118 | 0.62230 | 0.25439  |
| 0.26288 | 0.64949 | 0.63412  |
| 0.28885 | 0.61821 | 0.30648  |
| 0.39441 | 0.34251 | 0.26791  |
| 0.23189 | 0.78358 | 0.43642  |
| 0.20671 | 0.81586 | 0.36612  |
| 0.15134 | 0.81006 | 0.29325  |
| 0.12284 | 0.84012 | 0.23238  |
| 0.23454 | 0.85232 | 0.37159  |
| 0.26440 | 0.34971 | 0.34709  |
| 0.11408 | 0.90883 | 0.18509  |
| 0.14883 | 0.87679 | 0.24380  |
| 0.38251 | 0.59187 | 0.81944  |
| 0.20551 | 0.88261 | 0.31224  |
| 0.39605 | 0.40935 | 0.19736  |
| 0.72478 | 0.28192 | 0.43478  |
| 0.69809 | 0.31407 | 0.36664  |
| 0.64463 | 0.30828 | 0.28933  |
| 0.61588 | 0.33878 | 0.23115  |
| 0.72411 | 0.35084 | 0.37945  |
| 0.60655 | 0.40792 | 0.19067  |
| 0.63994 | 0.37559 | 0.24996  |
| 0.69481 | 0.38149 | 0.32284  |
| 0.34910 | 0.62403 | 0.75868  |
| 0.36144 | 0.37716 | 0.25614  |
| 0.29620 | 0.38068 | 0.29536  |
| 0.74253 | 0.24844 | 0.37557  |
| 0.24815 | 0.74975 | 0.37784  |
| 0.25579 | 0.24964 | 0.62114  |



|         |         |          |
|---------|---------|----------|
| 0.74386 | 0.75239 | 0.62027  |
| 0.25286 | 0.75162 | 0.62316  |
| 0.75582 | 0.25251 | 0.62094  |
| 0.75097 | 0.75166 | 0.37516  |
| 0.24750 | 0.25105 | 0.37522  |
| 0.29097 | 0.61895 | 0.69379  |
| 0.76708 | 0.78509 | 0.43590  |
| 0.22930 | 0.21799 | 0.43640  |
| 0.20124 | 0.18562 | 0.37032  |
| 0.14245 | 0.19088 | 0.30648  |
| 0.11203 | 0.16037 | 0.25104  |
| 0.23013 | 0.14943 | 0.37318  |
| 0.10530 | 0.09178 | 0.20159  |
| 0.13943 | 0.12399 | 0.26004  |
| 0.19906 | 0.11864 | 0.32009  |
| 0.79410 | 0.81742 | 0.36762  |
| 0.74808 | 0.44368 | 0.90088  |
| 0.79335 | 0.34985 | 0.63628  |
| 0.55299 | 0.34681 | 0.73065  |
| 0.60631 | 0.29125 | 0.62911  |
| 0.73677 | 0.59353 | 0.28770  |
| 0.23626 | 0.90968 | 0.70992  |
| 0.29243 | 0.85434 | 0.61183  |
| 0.06605 | 0.84035 | 0.78053  |
| 0.11872 | 0.78601 | 0.67032  |
| 0.79079 | 0.64921 | 0.38539  |
| 0.28355 | 0.41107 | 0.66631  |
| 0.22818 | 0.35565 | 0.56799  |
| 0.43088 | 0.33646 | 0.81029  |
| 0.56737 | 0.66206 | 0.20666  |
| 0.37852 | 0.28098 | 0.70510  |
| 0.73907 | 0.24742 | 0.27808  |
| 0.61743 | 0.71677 | 0.31831  |
| 0.77123 | 0.91260 | 0.68768  |
| 0.71469 | 0.85864 | 0.58562  |
| 0.92202 | 0.83680 | 0.81256  |
| 0.86906 | 0.78298 | 0.70088  |
| 0.24721 | 0.74921 | 0.28007  |
| 0.71334 | 0.59073 | 0.66880  |
| 0.77006 | 0.64480 | 0.56611  |
| 0.57360 | 0.66814 | 0.82305  |
| 0.62624 | 0.72230 | 0.71164  |
| 0.23536 | 0.09189 | 0.70469  |
| 0.29132 | 0.14772 | 0.61030  |
| 0.06444 | 0.16039 | 0.77758  |
| 0.11701 | 0.21537 | 0.67034  |
| 0.71364 | 0.41046 | 0.33410  |
| 0.76781 | 0.35512 | 0.43502  |
| 0.57367 | 0.33507 | 0.17137  |
| 0.62460 | 0.27954 | 0.27861  |
| 0.22588 | 0.91136 | 0.31927  |
| 0.27952 | 0.85683 | 0.42352  |
| 0.07900 | 0.83615 | 0.17670  |
| 0.12968 | 0.78154 | 0.28802  |
| 0.26430 | 0.59048 | 0.30342  |
| 0.20921 | 0.64618 | 0.39964  |
| 0.43078 | 0.66039 | 0.21232  |
| 0.37927 | 0.71542 | 0.32069  |
| 0.74170 | 0.75243 | 0.71800  |
| 0.76358 | 0.09243 | 0.28526  |
| 0.70743 | 0.14834 | 0.37876  |
| 0.93958 | 0.15875 | 0.23472  |
| 0.88653 | 0.21357 | 0.34183  |
| 0.25799 | 0.24950 | 0.71882  |
| 0.22049 | 0.09007 | 0.32356  |
| 0.27766 | 0.14562 | 0.41788  |
| 0.06606 | 0.16383 | 0.20084  |
| 0.12009 | 0.21924 | 0.30360  |
| 0.71472 | 0.52314 | 0.15104  |
| 0.57470 | 0.50161 | 0.57133  |
| 0.28760 | 0.52372 | 0.86420  |
| 0.42362 | 0.50204 | 0.42928  |
| 0.49881 | 0.49858 | 0.35824  |
| 0.58270 | 0.47251 | 0.36621  |
| 0.49954 | 0.50161 | 0.64149  |
| 0.41669 | 0.47404 | 0.63185  |
| 0.36193 | 0.44490 | -0.00041 |
| 0.50000 | 0.55419 | 0.25526  |
| 0.49820 | 0.55637 | 0.74909  |
| 0.64734 | 0.45200 | 0.98657  |
| 0.30374 | 0.50075 | 0.00042  |
| 0.29074 | 0.52399 | 0.14280  |
| 0.08026 | 0.02504 | 0.37818  |
| 0.21765 | 0.02201 | 0.86313  |
| 0.19725 | 0.99929 | 0.00357  |
| 0.99574 | 0.00218 | 0.35514  |
| 0.78405 | 0.02171 | 0.13417  |
| 0.80460 | 0.99967 | 0.99406  |

|         |         |          |
|---------|---------|----------|
| 0.92216 | 0.02613 | 0.62014  |
| 0.00618 | 0.00275 | 0.64258  |
| 0.13858 | 0.05555 | 0.00620  |
| 0.86336 | 0.05584 | 0.99223  |
| 0.00085 | 0.94496 | 0.24900  |
| 0.00054 | 0.94526 | 0.74796  |
| 0.21067 | 0.97582 | 0.13943  |
| 0.92165 | 0.99127 | 0.41832  |
| 0.79087 | 0.97704 | 0.85592  |
| 0.08002 | 0.99070 | 0.58062  |
| 0.27092 | 0.40798 | 0.28420  |
| 0.21265 | 0.35214 | 0.37526  |
| 0.44493 | 0.34010 | 0.23337  |
| 0.39009 | 0.28548 | 0.33870  |
| 0.75955 | 0.25356 | 0.71839  |
| 0.76895 | 0.91109 | 0.29822  |
| 0.71297 | 0.85610 | 0.39882  |
| 0.93273 | 0.83929 | 0.20609  |
| 0.87985 | 0.78483 | 0.31582  |
| 0.25398 | 0.75219 | 0.72090  |
| 0.26859 | 0.59063 | 0.69002  |
| 0.21648 | 0.64570 | 0.58577  |
| 0.42300 | 0.66344 | 0.81813  |
| 0.37429 | 0.71832 | 0.70522  |
| 0.75349 | 0.75160 | 0.27746  |
| 0.78412 | 0.09086 | 0.66954  |
| 0.72737 | 0.14636 | 0.57450  |
| 0.93499 | 0.16516 | 0.80308  |
| 0.88123 | 0.22066 | 0.70065  |
| 0.24513 | 0.25124 | 0.27755  |
| 0.73773 | 0.40716 | 0.72254  |
| 0.81905 | 0.43369 | 0.79274  |
| 0.81852 | 0.47350 | 0.69510  |
| 0.88207 | 0.46906 | 0.80750  |
| 0.92976 | 0.53020 | 0.86191  |
| 0.90255 | 0.57457 | -0.07761 |
| 0.93553 | 0.57255 | -0.22566 |
| 0.83825 | 0.53250 | 0.71237  |
| 0.82564 | 0.60354 | -0.30352 |
| 0.79481 | 0.60449 | -0.15411 |
| 0.74930 | 0.58069 | -0.26992 |
| 0.85273 | 0.48583 | 0.19292  |
| 0.71704 | 0.48152 | 0.08571  |
| 0.88430 | 0.50994 | 0.06324  |
| 0.87949 | 0.45880 | 1.06562  |
| 0.43951 | 0.40008 | 0.12050  |
| 0.93805 | 0.10176 | 0.87895  |
| 0.36495 | 0.55798 | 0.79438  |
| 0.56154 | 0.60362 | 0.88568  |
| 0.13090 | 0.05695 | 0.78060  |
| 0.06655 | 0.10005 | 0.87661  |
| 0.62169 | 0.56095 | 0.78005  |
| 0.43694 | 0.39990 | 0.87839  |
| 0.86974 | 0.94355 | 0.78700  |
| 0.93343 | 0.90036 | 0.11504  |
| 0.37961 | 0.44307 | 0.22603  |
| 0.93347 | 0.89994 | 0.88085  |
| 0.37958 | 0.44274 | 0.76917  |
| 0.43233 | 0.59982 | 0.12514  |
| 0.87015 | 0.05650 | 0.21779  |
| 0.93505 | 0.09986 | 0.12410  |
| 0.36864 | 0.55616 | 0.21939  |
| 0.87345 | 0.94395 | 0.21765  |
| 0.56719 | 0.39902 | 0.10726  |
| 0.13150 | 0.94277 | 0.21003  |
| 0.06742 | 0.89961 | 0.11494  |
| 0.61923 | 0.44148 | 0.22617  |
| 0.19288 | 0.99987 | 0.10978  |
| 0.94138 | 0.00275 | 0.34739  |
| 0.69637 | 0.49744 | 0.15421  |
| 0.44461 | 0.50056 | 0.35081  |
| 0.80713 | 0.99936 | 0.10377  |
| 0.06386 | 0.00070 | 0.34791  |
| 0.30849 | 0.50014 | 0.11152  |
| 0.56671 | 0.49807 | 0.34655  |
| 0.80907 | 0.00084 | 0.88678  |
| 0.06058 | 0.00311 | 0.65027  |
| 0.30616 | 0.49993 | 0.89437  |
| 0.55317 | 0.50486 | 0.64874  |
| 0.19453 | 0.99956 | 0.89270  |
| 0.93809 | 0.00159 | 0.64959  |
| 0.43086 | 0.49989 | 0.65226  |
| 0.00150 | 0.96123 | 0.17880  |
| 0.50088 | 0.47085 | 0.13029  |
| 0.99890 | 0.02955 | 0.13309  |
| 0.50115 | 0.53901 | 0.18261  |
| 0.00004 | 0.96156 | 0.81809  |
| 0.50063 | 0.47251 | 0.86535  |

|         |         |         |
|---------|---------|---------|
| 0.00296 | 0.02986 | 0.86537 |
| 0.49618 | 0.54076 | 0.82080 |
| 0.07420 | 0.97116 | 0.99826 |
| 0.60309 | 0.46373 | 0.99642 |
| 0.90230 | 0.03959 | 0.99377 |
| 0.42705 | 0.52926 | 0.00356 |
| 0.92737 | 0.97132 | 0.99873 |
| 0.40072 | 0.46134 | 0.99845 |
| 0.09954 | 0.03936 | 0.00455 |
| 0.57390 | 0.53136 | 0.99873 |
| 0.56519 | 0.60147 | 0.11991 |
| 0.11988 | 0.05796 | 0.23259 |
| 0.06366 | 0.10101 | 0.12174 |
| 0.63390 | 0.55845 | 0.20446 |
| 0.56477 | 0.40233 | 0.86656 |
| 0.12840 | 0.94399 | 0.77929 |
| 0.06779 | 0.90041 | 0.88071 |
| 0.62242 | 0.44651 | 0.76240 |
| 0.42806 | 0.60112 | 0.89161 |
| 0.88298 | 0.05895 | 0.76527 |
| 0.70424 | 0.49949 | 0.84615 |
| 0.79837 | 0.53151 | 0.88477 |
| 0.78903 | 0.48700 | 1.05078 |
| 0.77243 | 0.48772 | 0.89178 |
| 0.91179 | 0.00004 | 0.15477 |
| 0.91429 | 0.00084 | 0.83755 |
| 0.41122 | 0.50072 | 0.84242 |
| 0.41279 | 0.49952 | 0.15943 |
| 0.50219 | 0.43171 | 0.99457 |
| 0.00091 | 0.06957 | 0.99965 |
| 0.58687 | 0.50047 | 0.15694 |
| 0.08752 | 0.00030 | 0.15989 |
| 0.49844 | 0.57016 | 0.00271 |
| 0.09002 | 0.00021 | 0.84278 |
| 0.58718 | 0.50278 | 0.83927 |
| 0.00067 | 0.93108 | 0.99793 |

## POSCAR file for gb\_product

POSCAR file from zrtepb-gb-meoh-c.res: C: 141 F: 1 H: 116 O: 66 P: 1 ZR: 12  
34.89200000000000

0.5792995890490465 -0.0000450140396845 0.0007649282407427  
-0.0000781726227076 1.0082675674799713 0.0000166934211398  
0.0004256087542374 0.0000053656439079 0.3214078049098053

141 1 116 66 1 12

Direct

|         |         |         |
|---------|---------|---------|
| 0.79340 | 0.88444 | 0.30370 |
| 0.23349 | 0.21785 | 0.56214 |
| 0.72854 | 0.72088 | 0.42862 |
| 0.70415 | 0.68903 | 0.35438 |
| 0.63809 | 0.69020 | 0.31805 |
| 0.61060 | 0.65976 | 0.25763 |
| 0.85603 | 0.81379 | 0.31291 |
| 0.74308 | 0.65763 | 0.32336 |
| 0.61353 | 0.59410 | 0.18290 |
| 0.64808 | 0.62706 | 0.23666 |
| 0.71480 | 0.62627 | 0.26791 |
| 0.88568 | 0.84359 | 0.25249 |
| 0.20642 | 0.18537 | 0.63090 |
| 0.23336 | 0.78400 | 0.56173 |
| 0.20708 | 0.81674 | 0.63016 |
| 0.14310 | 0.81334 | 0.67714 |
| 0.11383 | 0.84353 | 0.73653 |
| 0.24176 | 0.85073 | 0.64715 |
| 0.11292 | 0.91019 | 0.80593 |
| 0.14732 | 0.87812 | 0.74661 |
| 0.21163 | 0.88161 | 0.70250 |
| 0.76307 | 0.85420 | 0.36152 |
| 0.72915 | 0.28341 | 0.55957 |
| 0.14204 | 0.18841 | 0.67623 |
| 0.70105 | 0.31668 | 0.62319 |
| 0.63255 | 0.31773 | 0.64227 |
| 0.60307 | 0.34914 | 0.69492 |
| 0.88933 | 0.91076 | 0.18907 |
| 0.73932 | 0.34787 | 0.65792 |
| 0.60904 | 0.41345 | 0.78589 |
| 0.64124 | 0.38095 | 0.72372 |
| 0.70936 | 0.38024 | 0.70448 |
| 0.85502 | 0.87917 | 0.25004 |
| 0.77341 | 0.21895 | 0.56191 |
| 0.11252 | 0.15791 | 0.73382 |
| 0.80179 | 0.18687 | 0.62870 |
| 0.85792 | 0.19256 | 0.69956 |
| 0.88833 | 0.16202 | 0.75496 |
| 0.77534 | 0.15015 | 0.61891 |
| 0.89758 | 0.09298 | 0.79765 |
| 0.86351 | 0.12524 | 0.73938 |

|         |         |         |
|---------|---------|---------|
| 0.80630 | 0.11944 | 0.67240 |
| 0.24114 | 0.15136 | 0.64729 |
| 0.11239 | 0.09107 | 0.80333 |
| 0.14616 | 0.12336 | 0.74368 |
| 0.21075 | 0.12024 | 0.70066 |
| 0.72195 | 0.72060 | 0.55405 |
| 0.69420 | 0.68804 | 0.61936 |
| 0.26867 | 0.71740 | 0.56426 |
| 0.64726 | 0.69437 | 0.70974 |
| 0.61955 | 0.66416 | 0.77139 |
| 0.71251 | 0.65051 | 0.59323 |
| 0.60805 | 0.59468 | 0.80922 |
| 0.63740 | 0.62686 | 0.74246 |
| 0.68341 | 0.62023 | 0.65199 |
| 0.76176 | 0.78635 | 0.56163 |
| 0.78772 | 0.81810 | 0.63419 |
| 0.84509 | 0.81169 | 0.70115 |
| 0.87552 | 0.84128 | 0.76151 |
| 0.29384 | 0.68502 | 0.63462 |
| 0.75981 | 0.85453 | 0.63435 |
| 0.88649 | 0.90975 | 0.81147 |
| 0.81509 | 0.45820 | 0.79396 |
| 0.84970 | 0.87807 | 0.75463 |
| 0.90957 | 0.55136 | 0.82860 |
| 0.83622 | 0.54398 | 0.81194 |
| 0.79642 | 0.58025 | 0.80632 |
| 0.79104 | 0.88442 | 0.69238 |
| 0.80747 | 0.44969 | 0.11060 |
| 0.27524 | 0.28299 | 0.55964 |
| 0.30280 | 0.31548 | 0.62591 |
| 0.35818 | 0.30979 | 0.69867 |
| 0.38830 | 0.34028 | 0.75480 |
| 0.27661 | 0.35221 | 0.61525 |
| 0.39854 | 0.40931 | 0.79551 |
| 0.35114 | 0.69029 | 0.70277 |
| 0.36396 | 0.37711 | 0.73794 |
| 0.27208 | 0.28332 | 0.43399 |
| 0.30732 | 0.38292 | 0.66944 |
| 0.76742 | 0.21699 | 0.43662 |
| 0.79521 | 0.18429 | 0.36978 |
| 0.86153 | 0.18635 | 0.33414 |
| 0.30052 | 0.31549 | 0.36532 |
| 0.89122 | 0.15604 | 0.27596 |
| 0.75899 | 0.15137 | 0.34472 |
| 0.88952 | 0.09052 | 0.19564 |
| 0.37945 | 0.66011 | 0.76347 |
| 0.85574 | 0.12253 | 0.25675 |
| 0.78952 | 0.12026 | 0.29146 |
| 0.36635 | 0.31254 | 0.32729 |
| 0.26706 | 0.71667 | 0.43851 |
| 0.29282 | 0.68379 | 0.37023 |
| 0.35484 | 0.68768 | 0.31557 |
| 0.38361 | 0.65733 | 0.25624 |
| 0.25955 | 0.64902 | 0.36064 |
| 0.38603 | 0.59006 | 0.19273 |
| 0.35169 | 0.62208 | 0.25291 |
| 0.26416 | 0.64903 | 0.63339 |
| 0.28925 | 0.61813 | 0.30472 |
| 0.39704 | 0.34266 | 0.26952 |
| 0.23167 | 0.78327 | 0.43595 |
| 0.20657 | 0.81566 | 0.36564 |
| 0.15190 | 0.80988 | 0.29112 |
| 0.12354 | 0.84002 | 0.23023 |
| 0.23381 | 0.85222 | 0.37291 |
| 0.26571 | 0.34904 | 0.34214 |
| 0.11420 | 0.90888 | 0.18481 |
| 0.14883 | 0.87678 | 0.24351 |
| 0.38600 | 0.59177 | 0.81527 |
| 0.20481 | 0.88260 | 0.31381 |
| 0.39728 | 0.40901 | 0.19357 |
| 0.72390 | 0.28151 | 0.43420 |
| 0.69755 | 0.31382 | 0.36638 |
| 0.64459 | 0.30830 | 0.28789 |
| 0.61624 | 0.33903 | 0.23026 |
| 0.72344 | 0.35054 | 0.38135 |
| 0.60746 | 0.40820 | 0.19171 |
| 0.64018 | 0.37574 | 0.25109 |
| 0.69448 | 0.38141 | 0.32547 |
| 0.35152 | 0.62382 | 0.75600 |
| 0.36308 | 0.37681 | 0.25320 |
| 0.29719 | 0.37992 | 0.28931 |
| 0.74270 | 0.24824 | 0.37511 |
| 0.24874 | 0.74957 | 0.37742 |
| 0.25594 | 0.25022 | 0.62112 |
| 0.73963 | 0.75331 | 0.61751 |
| 0.25194 | 0.75115 | 0.62278 |
| 0.75452 | 0.25229 | 0.62104 |
| 0.75105 | 0.75372 | 0.37269 |

|         |         |         |
|---------|---------|---------|
| 0.24903 | 0.25106 | 0.37506 |
| 0.29320 | 0.61851 | 0.69182 |
| 0.76690 | 0.78663 | 0.43613 |
| 0.22984 | 0.21827 | 0.43654 |
| 0.20159 | 0.18582 | 0.37083 |
| 0.14359 | 0.19119 | 0.30481 |
| 0.11322 | 0.16068 | 0.24911 |
| 0.22960 | 0.14942 | 0.37605 |
| 0.10574 | 0.09199 | 0.20143 |
| 0.13975 | 0.12416 | 0.26022 |
| 0.19851 | 0.11865 | 0.32285 |
| 0.79491 | 0.81897 | 0.36971 |
| 0.65954 | 0.42533 | 1.02775 |
| 0.79307 | 0.34710 | 0.64479 |
| 0.54994 | 0.34954 | 0.71425 |
| 0.60245 | 0.29330 | 0.61541 |
| 0.74418 | 0.60078 | 0.24936 |
| 0.23750 | 0.90876 | 0.71298 |
| 0.29292 | 0.85304 | 0.61561 |
| 0.06409 | 0.84121 | 0.77463 |
| 0.11614 | 0.78661 | 0.66488 |
| 0.79555 | 0.65728 | 0.34780 |
| 0.28804 | 0.41184 | 0.65985 |
| 0.23163 | 0.35656 | 0.56315 |
| 0.43173 | 0.33643 | 0.81163 |
| 0.55907 | 0.66017 | 0.22806 |
| 0.37840 | 0.28104 | 0.70798 |
| 0.74003 | 0.24725 | 0.27753 |
| 0.60811 | 0.71519 | 0.33995 |
| 0.77080 | 0.91326 | 0.68879 |
| 0.71326 | 0.85949 | 0.58747 |
| 0.92077 | 0.83679 | 0.81299 |
| 0.86673 | 0.78313 | 0.70224 |
| 0.24835 | 0.74909 | 0.27967 |
| 0.69629 | 0.59087 | 0.62994 |
| 0.75048 | 0.64507 | 0.52609 |
| 0.58319 | 0.66864 | 0.84249 |
| 0.63185 | 0.72356 | 0.72967 |
| 0.23677 | 0.09309 | 0.70944 |
| 0.29235 | 0.14921 | 0.61595 |
| 0.06246 | 0.15994 | 0.77069 |
| 0.11491 | 0.21509 | 0.66412 |
| 0.71323 | 0.41034 | 0.33793 |
| 0.76669 | 0.35459 | 0.43822 |
| 0.57452 | 0.33557 | 0.16922 |
| 0.62463 | 0.27960 | 0.27573 |
| 0.22469 | 0.91142 | 0.32254 |
| 0.27822 | 0.85683 | 0.42630 |
| 0.08033 | 0.83598 | 0.17303 |
| 0.13060 | 0.78132 | 0.28438 |
| 0.26429 | 0.59053 | 0.30069 |
| 0.20973 | 0.64619 | 0.39800 |
| 0.43181 | 0.66003 | 0.21240 |
| 0.38078 | 0.71494 | 0.32205 |
| 0.73682 | 0.75274 | 0.71513 |
| 0.76219 | 0.09385 | 0.27594 |
| 0.70662 | 0.14994 | 0.36968 |
| 0.94266 | 0.15746 | 0.24558 |
| 0.88981 | 0.21219 | 0.35336 |
| 0.25761 | 0.25023 | 0.71884 |
| 0.21932 | 0.08996 | 0.32818 |
| 0.27650 | 0.14540 | 0.42263 |
| 0.06800 | 0.16432 | 0.19688 |
| 0.12179 | 0.21966 | 0.30009 |
| 0.70281 | 0.52925 | 0.19304 |
| 0.58266 | 0.49817 | 0.57888 |
| 0.29270 | 0.52454 | 0.85892 |
| 0.42289 | 0.50448 | 0.42625 |
| 0.49772 | 0.49839 | 0.35734 |
| 0.58230 | 0.47299 | 0.36725 |
| 0.50711 | 0.50290 | 0.64257 |
| 0.42497 | 0.47460 | 0.62677 |
| 0.36495 | 0.44468 | 0.99424 |
| 0.50024 | 0.55407 | 0.25463 |
| 0.50303 | 0.55675 | 0.74924 |
| 0.64851 | 0.44956 | 0.98594 |
| 0.30622 | 0.50062 | 0.98998 |
| 0.29083 | 0.52299 | 0.13858 |
| 0.08052 | 0.02535 | 0.37738 |
| 0.21810 | 0.02212 | 0.86250 |
| 0.19759 | 0.99937 | 0.00380 |
| 0.99591 | 0.00253 | 0.35464 |
| 0.78404 | 0.02200 | 0.13274 |
| 0.80485 | 0.00007 | 0.99389 |
| 0.92264 | 0.02642 | 0.61956 |
| 0.00655 | 0.00298 | 0.64196 |
| 0.13904 | 0.05578 | 0.00588 |
| 0.86377 | 0.05616 | 0.99167 |

|         |         |         |
|---------|---------|---------|
| 0.00137 | 0.94521 | 0.24842 |
| 0.00087 | 0.94553 | 0.74710 |
| 0.21085 | 0.97571 | 0.13870 |
| 0.92179 | 0.99155 | 0.41739 |
| 0.79110 | 0.97763 | 0.85428 |
| 0.08052 | 0.99110 | 0.57995 |
| 0.27118 | 0.40683 | 0.27484 |
| 0.21353 | 0.35112 | 0.36800 |
| 0.44818 | 0.34054 | 0.23782 |
| 0.39359 | 0.28622 | 0.34487 |
| 0.75761 | 0.25336 | 0.71856 |
| 0.76993 | 0.91244 | 0.29830 |
| 0.71372 | 0.85766 | 0.40021 |
| 0.93344 | 0.84026 | 0.20751 |
| 0.88050 | 0.78608 | 0.31897 |
| 0.25255 | 0.75168 | 0.72052 |
| 0.27136 | 0.59007 | 0.68748 |
| 0.21765 | 0.64500 | 0.58553 |
| 0.42464 | 0.66370 | 0.81578 |
| 0.37434 | 0.71843 | 0.70476 |
| 0.75528 | 0.75412 | 0.27524 |
| 0.78673 | 0.09055 | 0.66381 |
| 0.72982 | 0.14589 | 0.56825 |
| 0.93239 | 0.16579 | 0.81022 |
| 0.87856 | 0.22125 | 0.70768 |
| 0.24720 | 0.25108 | 0.27737 |
| 0.73849 | 0.40505 | 0.72999 |
| 0.82135 | 0.42861 | 0.82312 |
| 0.78759 | 0.45818 | 0.70915 |
| 0.86359 | 0.47166 | 0.77998 |
| 0.93795 | 0.52460 | 0.83317 |
| 0.91726 | 0.56692 | 0.91299 |
| 0.92975 | 0.56882 | 0.75537 |
| 0.82849 | 0.52774 | 0.72805 |
| 0.81048 | 0.59737 | 0.72780 |
| 0.80513 | 0.59756 | 0.88692 |
| 0.74336 | 0.57344 | 0.80136 |
| 0.78382 | 0.43268 | 0.18135 |
| 0.72996 | 0.48982 | 0.13042 |
| 0.82771 | 0.47631 | 0.14672 |
| 0.84767 | 0.43291 | 0.06970 |
| 0.44106 | 0.39983 | 0.11719 |
| 0.93831 | 0.10202 | 0.87928 |
| 0.36950 | 0.55775 | 0.78934 |
| 0.56468 | 0.60345 | 0.88698 |
| 0.13119 | 0.05726 | 0.77992 |
| 0.06673 | 0.10028 | 0.87597 |
| 0.62738 | 0.56116 | 0.78484 |
| 0.44081 | 0.40027 | 0.87430 |
| 0.87001 | 0.94380 | 0.78634 |
| 0.93346 | 0.90093 | 0.11412 |
| 0.38015 | 0.44267 | 0.22132 |
| 0.93360 | 0.90012 | 0.88010 |
| 0.38421 | 0.44318 | 0.76428 |
| 0.43189 | 0.59970 | 0.12133 |
| 0.87013 | 0.05665 | 0.21688 |
| 0.93557 | 0.10002 | 0.12438 |
| 0.36900 | 0.55595 | 0.21679 |
| 0.87380 | 0.94472 | 0.21660 |
| 0.56906 | 0.39948 | 0.10658 |
| 0.13167 | 0.94282 | 0.20972 |
| 0.06753 | 0.89977 | 0.11447 |
| 0.61939 | 0.44169 | 0.22857 |
| 0.19333 | 0.99987 | 0.10930 |
| 0.94161 | 0.00319 | 0.34677 |
| 0.69624 | 0.50149 | 0.18694 |
| 0.44355 | 0.49977 | 0.34883 |
| 0.80716 | 0.99966 | 0.10233 |
| 0.06411 | 0.00096 | 0.34747 |
| 0.31022 | 0.49968 | 0.10652 |
| 0.56561 | 0.49834 | 0.34678 |
| 0.80958 | 0.00131 | 0.88542 |
| 0.06098 | 0.00333 | 0.64980 |
| 0.30961 | 0.50021 | 0.88820 |
| 0.56044 | 0.50697 | 0.65110 |
| 0.19480 | 0.99974 | 0.89209 |
| 0.93851 | 0.00185 | 0.64893 |
| 0.43813 | 0.50037 | 0.65000 |
| 0.00182 | 0.96150 | 0.17821 |
| 0.50180 | 0.47069 | 0.13008 |
| 0.99934 | 0.02981 | 0.13281 |
| 0.50150 | 0.53907 | 0.18163 |
| 0.00041 | 0.96179 | 0.81737 |
| 0.50552 | 0.47324 | 0.86578 |
| 0.00345 | 0.03009 | 0.86499 |
| 0.50118 | 0.54091 | 0.82048 |
| 0.07459 | 0.97138 | 0.99767 |
| 0.60693 | 0.46421 | 0.99913 |

|         |         |         |
|---------|---------|---------|
| 0.90269 | 0.03988 | 0.99325 |
| 0.42910 | 0.52918 | 0.00069 |
| 0.92779 | 0.97162 | 0.99799 |
| 0.40350 | 0.46131 | 0.99421 |
| 0.10001 | 0.03958 | 0.00414 |
| 0.57642 | 0.53150 | 0.00115 |
| 0.56378 | 0.60254 | 0.11959 |
| 0.12026 | 0.05813 | 0.23228 |
| 0.06418 | 0.10120 | 0.12137 |
| 0.63315 | 0.56052 | 0.20615 |
| 0.56841 | 0.40321 | 0.86648 |
| 0.12881 | 0.94410 | 0.77860 |
| 0.06796 | 0.90060 | 0.87985 |
| 0.62341 | 0.44740 | 0.75802 |
| 0.43149 | 0.60113 | 0.88746 |
| 0.88381 | 0.05923 | 0.76470 |
| 0.70083 | 0.50330 | 0.86808 |
| 0.81475 | 0.52175 | 0.91120 |
| 0.75676 | 0.45658 | 0.02429 |
| 0.76593 | 0.48374 | 0.90372 |
| 0.91214 | 0.00043 | 0.15396 |
| 0.91463 | 0.00114 | 0.83686 |
| 0.41614 | 0.50071 | 0.83864 |
| 0.41299 | 0.49946 | 0.15652 |
| 0.50477 | 0.43192 | 0.99332 |
| 0.00141 | 0.06982 | 0.99927 |
| 0.58701 | 0.50029 | 0.15877 |
| 0.08789 | 0.00049 | 0.15955 |
| 0.50005 | 0.57017 | 0.00156 |
| 0.09053 | 0.00045 | 0.84215 |
| 0.59367 | 0.50314 | 0.84278 |
| 0.00108 | 0.93134 | 0.99717 |

## POSCAR file for gd\_solvent

POSCAR file from zrtepb-gd-meoh-c.res: C: 144 F: 1 H: 122 O: 66 P: 1 ZR: 12

```
34.89200000000000
0.5792995890490465 -0.0000450140396845 0.0007649282407427
-0.0000781726227076 1.0082675674799713 0.0000166934211398
0.0004256087542374 0.0000053656439079 0.3214078049098053
```

144 1 122 66 1 12

Direct

|         |         |         |
|---------|---------|---------|
| 0.79244 | 0.88301 | 0.30309 |
| 0.64941 | 0.62460 | 0.24158 |
| 0.39252 | 0.34185 | 0.26530 |
| 0.23238 | 0.78326 | 0.43720 |
| 0.20701 | 0.81554 | 0.36700 |
| 0.15059 | 0.80989 | 0.29664 |
| 0.12204 | 0.83994 | 0.23578 |
| 0.23573 | 0.85179 | 0.37004 |
| 0.26427 | 0.35008 | 0.35228 |
| 0.11437 | 0.90851 | 0.18583 |
| 0.14898 | 0.87644 | 0.24488 |
| 0.38542 | 0.59170 | 0.81854 |
| 0.71178 | 0.62092 | 0.29313 |
| 0.20658 | 0.88210 | 0.31092 |
| 0.39587 | 0.40923 | 0.20041 |
| 0.72281 | 0.28072 | 0.43867 |
| 0.69410 | 0.31271 | 0.37293 |
| 0.64206 | 0.30646 | 0.29260 |
| 0.61204 | 0.33684 | 0.23579 |
| 0.71676 | 0.34998 | 0.39152 |
| 0.60199 | 0.40628 | 0.19666 |
| 0.63305 | 0.37394 | 0.25993 |
| 0.68573 | 0.38043 | 0.33771 |
| 0.88502 | 0.84238 | 0.25304 |
| 0.35183 | 0.62385 | 0.75801 |
| 0.36073 | 0.37700 | 0.25788 |
| 0.29625 | 0.38099 | 0.30062 |
| 0.74113 | 0.24756 | 0.37809 |
| 0.24918 | 0.74956 | 0.37835 |
| 0.25457 | 0.24970 | 0.62240 |
| 0.74428 | 0.75175 | 0.62064 |
| 0.25306 | 0.75105 | 0.62374 |
| 0.75673 | 0.25126 | 0.62321 |
| 0.75009 | 0.75189 | 0.37539 |
| 0.20621 | 0.18471 | 0.63210 |
| 0.24711 | 0.25080 | 0.37637 |
| 0.29344 | 0.61860 | 0.69401 |
| 0.76655 | 0.78508 | 0.43691 |
| 0.22885 | 0.21778 | 0.43759 |
| 0.20089 | 0.18535 | 0.37155 |
| 0.14134 | 0.19038 | 0.30975 |
| 0.11111 | 0.15985 | 0.25410 |
| 0.23053 | 0.14934 | 0.37243 |
| 0.10546 | 0.09140 | 0.20236 |
| 0.13934 | 0.12365 | 0.26117 |

|         |         |         |
|---------|---------|---------|
| 0.23438 | 0.78393 | 0.56314 |
| 0.19956 | 0.11850 | 0.31944 |
| 0.79377 | 0.81746 | 0.36899 |
| 0.20809 | 0.81655 | 0.63186 |
| 0.14550 | 0.81235 | 0.68402 |
| 0.11588 | 0.84247 | 0.74324 |
| 0.24124 | 0.85124 | 0.64379 |
| 0.11288 | 0.90965 | 0.80750 |
| 0.23273 | 0.21725 | 0.56325 |
| 0.14770 | 0.87765 | 0.74854 |
| 0.21079 | 0.88191 | 0.69967 |
| 0.76189 | 0.85267 | 0.36019 |
| 0.73052 | 0.28253 | 0.56385 |
| 0.14333 | 0.18840 | 0.68343 |
| 0.70256 | 0.31533 | 0.63031 |
| 0.63449 | 0.31494 | 0.65379 |
| 0.60406 | 0.34596 | 0.70669 |
| 0.88918 | 0.90975 | 0.19060 |
| 0.73955 | 0.34735 | 0.66254 |
| 0.73092 | 0.71861 | 0.43331 |
| 0.60574 | 0.41113 | 0.78955 |
| 0.64056 | 0.37871 | 0.73177 |
| 0.70850 | 0.37937 | 0.70962 |
| 0.85442 | 0.87796 | 0.25045 |
| 0.97924 | 0.51802 | 1.03385 |
| 0.88094 | 0.47849 | 0.96201 |
| 0.89201 | 0.50505 | 1.16808 |
| 0.77440 | 0.21795 | 0.56270 |
| 0.11390 | 0.15788 | 0.74099 |
| 0.80336 | 0.18583 | 0.62834 |
| 0.86204 | 0.19106 | 0.69256 |
| 0.89219 | 0.16047 | 0.74815 |
| 0.77452 | 0.14960 | 0.62454 |
| 0.70662 | 0.68626 | 0.36120 |
| 0.89792 | 0.09187 | 0.79841 |
| 0.86459 | 0.12415 | 0.73886 |
| 0.80528 | 0.11879 | 0.67785 |
| 0.23971 | 0.15010 | 0.64297 |
| 0.11214 | 0.09045 | 0.80462 |
| 0.14607 | 0.12277 | 0.74532 |
| 0.20936 | 0.11906 | 0.69686 |
| 0.72746 | 0.71857 | 0.55926 |
| 0.70096 | 0.68609 | 0.62714 |
| 0.26963 | 0.71731 | 0.56489 |
| 0.64496 | 0.69000 | 0.30581 |
| 0.64717 | 0.69197 | 0.70432 |
| 0.61837 | 0.66177 | 0.76461 |
| 0.72597 | 0.64917 | 0.61469 |
| 0.60879 | 0.59249 | 0.80757 |
| 0.64168 | 0.62481 | 0.74641 |
| 0.69542 | 0.61874 | 0.67074 |
| 0.76400 | 0.78496 | 0.56274 |
| 0.78982 | 0.81704 | 0.63392 |
| 0.84730 | 0.81095 | 0.70086 |
| 0.87716 | 0.84067 | 0.76148 |
| 0.61712 | 0.65971 | 0.24485 |
| 0.29485 | 0.68495 | 0.63510 |
| 0.76140 | 0.85330 | 0.63377 |
| 0.88668 | 0.90905 | 0.81257 |
| 0.79966 | 0.53994 | 0.74768 |
| 0.85065 | 0.87727 | 0.75478 |
| 0.90350 | 0.51327 | 0.03476 |
| 0.84823 | 0.54155 | 0.01668 |
| 0.83100 | 0.56371 | 0.12769 |
| 0.79204 | 0.88333 | 0.69211 |
| 0.75936 | 0.40979 | 0.07327 |
| 0.85519 | 0.81250 | 0.31289 |
| 0.27290 | 0.28271 | 0.56119 |
| 0.30041 | 0.31509 | 0.62787 |
| 0.35785 | 0.30963 | 0.69556 |
| 0.38753 | 0.34003 | 0.75287 |
| 0.27215 | 0.35145 | 0.62287 |
| 0.39436 | 0.40867 | 0.80169 |
| 0.35235 | 0.69015 | 0.70290 |
| 0.36078 | 0.37651 | 0.74189 |
| 0.26937 | 0.28318 | 0.43547 |
| 0.30253 | 0.38211 | 0.67787 |
| 0.74095 | 0.65190 | 0.34909 |
| 0.76671 | 0.21617 | 0.43760 |
| 0.79370 | 0.18359 | 0.36908 |
| 0.85795 | 0.18699 | 0.32342 |
| 0.29730 | 0.31548 | 0.36706 |
| 0.88778 | 0.15669 | 0.26542 |
| 0.75937 | 0.14945 | 0.35268 |
| 0.88917 | 0.08987 | 0.19608 |
| 0.38034 | 0.66001 | 0.76426 |
| 0.85466 | 0.12199 | 0.25557 |
| 0.79017 | 0.11853 | 0.29883 |



|         |         |         |
|---------|---------|---------|
| 0.61553 | 0.59209 | 0.18311 |
| 0.36145 | 0.31155 | 0.32130 |
| 0.26765 | 0.71665 | 0.43895 |
| 0.29346 | 0.68405 | 0.36969 |
| 0.35450 | 0.68866 | 0.31209 |
| 0.38364 | 0.65858 | 0.25196 |
| 0.26121 | 0.64894 | 0.36167 |
| 0.38785 | 0.59094 | 0.19172 |
| 0.35293 | 0.62301 | 0.25043 |
| 0.26480 | 0.64903 | 0.63467 |
| 0.29122 | 0.61840 | 0.30450 |
| 0.81091 | 0.47124 | 0.83136 |
| 0.79300 | 0.34768 | 0.64566 |
| 0.55122 | 0.34558 | 0.72832 |
| 0.60550 | 0.28982 | 0.62931 |
| 0.73645 | 0.59325 | 0.29000 |
| 0.23545 | 0.90954 | 0.70673 |
| 0.29147 | 0.85424 | 0.60831 |
| 0.06712 | 0.83959 | 0.78492 |
| 0.11982 | 0.78505 | 0.67571 |
| 0.79089 | 0.64939 | 0.38581 |
| 0.28171 | 0.41080 | 0.67279 |
| 0.22558 | 0.35547 | 0.57525 |
| 0.43229 | 0.33643 | 0.80643 |
| 0.56908 | 0.66219 | 0.20082 |
| 0.37989 | 0.28121 | 0.69985 |
| 0.73711 | 0.24676 | 0.28065 |
| 0.61845 | 0.71705 | 0.31329 |
| 0.77129 | 0.91205 | 0.68866 |
| 0.71489 | 0.85804 | 0.58656 |
| 0.92242 | 0.83643 | 0.81314 |
| 0.86937 | 0.78251 | 0.70199 |
| 0.24859 | 0.74915 | 0.28059 |
| 0.71159 | 0.58953 | 0.65485 |
| 0.76970 | 0.64437 | 0.55952 |
| 0.57642 | 0.66591 | 0.82508 |
| 0.62712 | 0.72074 | 0.71409 |
| 0.23435 | 0.09149 | 0.70174 |
| 0.28997 | 0.14743 | 0.60738 |
| 0.06494 | 0.16032 | 0.78214 |
| 0.11724 | 0.21558 | 0.67574 |
| 0.70228 | 0.40972 | 0.35183 |
| 0.75964 | 0.35473 | 0.44857 |
| 0.57187 | 0.33277 | 0.17177 |
| 0.62445 | 0.27739 | 0.27768 |
| 0.22761 | 0.91073 | 0.31622 |
| 0.28154 | 0.85614 | 0.41971 |
| 0.07756 | 0.83611 | 0.18168 |
| 0.12817 | 0.78155 | 0.29348 |
| 0.26737 | 0.59047 | 0.30189 |
| 0.21206 | 0.64554 | 0.40132 |
| 0.43138 | 0.66168 | 0.20677 |
| 0.37953 | 0.71623 | 0.31735 |
| 0.74261 | 0.75152 | 0.71839 |
| 0.76455 | 0.09125 | 0.29002 |
| 0.70830 | 0.14694 | 0.38452 |
| 0.93770 | 0.15898 | 0.22811 |
| 0.88470 | 0.21380 | 0.33542 |
| 0.25648 | 0.24962 | 0.72010 |
| 0.22146 | 0.09005 | 0.32172 |
| 0.27860 | 0.14572 | 0.41538 |
| 0.06475 | 0.16316 | 0.20498 |
| 0.11824 | 0.21855 | 0.30863 |
| 0.71536 | 0.51786 | 0.15595 |
| 0.57546 | 0.49639 | 0.57807 |
| 0.28697 | 0.52246 | 0.86270 |
| 0.41916 | 0.49819 | 0.41942 |
| 0.51052 | 0.49819 | 0.35716 |
| 0.57775 | 0.46949 | 0.36019 |
| 0.49516 | 0.50077 | 0.64453 |
| 0.42004 | 0.47272 | 0.63500 |
| 0.36227 | 0.44470 | 0.00187 |
| 0.50180 | 0.55352 | 0.25490 |
| 0.50007 | 0.55484 | 0.74828 |
| 0.64719 | 0.44813 | 0.99478 |
| 0.30472 | 0.50096 | 0.01564 |
| 0.29633 | 0.52645 | 0.14240 |
| 0.08073 | 0.02485 | 0.37815 |
| 0.21756 | 0.02184 | 0.86290 |
| 0.19748 | 0.99899 | 0.00377 |
| 0.99632 | 0.00184 | 0.35590 |
| 0.78419 | 0.02134 | 0.13510 |
| 0.80473 | 0.99919 | 0.99569 |
| 0.92217 | 0.02558 | 0.62115 |
| 0.00589 | 0.00221 | 0.64310 |
| 0.13876 | 0.05527 | 0.00676 |
| 0.86362 | 0.05539 | 0.99311 |
| 0.00133 | 0.94456 | 0.24982 |

|         |         |         |
|---------|---------|---------|
| 0.00061 | 0.94489 | 0.74845 |
| 0.21131 | 0.97551 | 0.13910 |
| 0.92218 | 0.99100 | 0.41938 |
| 0.79070 | 0.97666 | 0.85707 |
| 0.08010 | 0.99066 | 0.58058 |
| 0.27176 | 0.40863 | 0.29228 |
| 0.21312 | 0.35291 | 0.38343 |
| 0.44240 | 0.33913 | 0.22807 |
| 0.38711 | 0.28432 | 0.33182 |
| 0.76129 | 0.25209 | 0.72056 |
| 0.76888 | 0.91099 | 0.29785 |
| 0.71241 | 0.85613 | 0.39838 |
| 0.93298 | 0.83909 | 0.20873 |
| 0.87989 | 0.78485 | 0.31930 |
| 0.25378 | 0.75149 | 0.72149 |
| 0.27141 | 0.59019 | 0.69063 |
| 0.21817 | 0.64509 | 0.58713 |
| 0.42556 | 0.66352 | 0.81655 |
| 0.37591 | 0.71820 | 0.70401 |
| 0.75208 | 0.75214 | 0.27768 |
| 0.78389 | 0.09022 | 0.67403 |
| 0.72710 | 0.14588 | 0.57942 |
| 0.93795 | 0.16382 | 0.79901 |
| 0.88467 | 0.21935 | 0.69555 |
| 0.24518 | 0.25090 | 0.27867 |
| 0.73662 | 0.40511 | 0.73076 |
| 0.78218 | 0.53079 | 0.65928 |
| 0.77971 | 0.56844 | 0.76686 |
| 0.85413 | 0.54051 | 0.74822 |
| 0.86067 | 0.56152 | 0.94361 |
| 0.87373 | 0.58082 | 0.15658 |
| 0.81770 | 0.54402 | 0.20066 |
| 0.78907 | 0.58302 | 0.11155 |
| 0.72398 | 0.39035 | 0.11830 |
| 0.71942 | 0.46293 | 0.08952 |
| 0.79705 | 0.41809 | 0.14002 |
| 0.78392 | 0.39359 | 0.00127 |
| 0.88441 | 0.48504 | 0.86264 |
| 0.91736 | 0.45405 | 0.97404 |
| 0.83397 | 0.46056 | 0.96388 |
| 0.92303 | 0.47801 | 1.16460 |
| 0.91268 | 0.53464 | 1.18621 |
| 0.84490 | 0.50001 | 1.22180 |
| 1.01597 | 0.51507 | 0.95719 |
| 1.01163 | 0.49553 | 1.07791 |
| 0.98862 | 0.54883 | 1.06038 |
| 0.43953 | 0.39993 | 0.12392 |
| 0.93855 | 0.10106 | 0.87982 |
| 0.36752 | 0.55787 | 0.79373 |
| 0.56418 | 0.60167 | 0.88231 |
| 0.13067 | 0.05666 | 0.78039 |
| 0.06669 | 0.09965 | 0.87766 |
| 0.62652 | 0.55881 | 0.78139 |
| 0.43565 | 0.39944 | 0.88187 |
| 0.86982 | 0.94307 | 0.78774 |
| 0.93360 | 0.90003 | 0.11603 |
| 0.37993 | 0.44297 | 0.22981 |
| 0.93357 | 0.89953 | 0.88175 |
| 0.37982 | 0.44247 | 0.77067 |
| 0.43557 | 0.60029 | 0.12385 |
| 0.87040 | 0.05602 | 0.21903 |
| 0.93516 | 0.09933 | 0.12465 |
| 0.36948 | 0.55701 | 0.21402 |
| 0.87370 | 0.94366 | 0.21860 |
| 0.56697 | 0.39743 | 0.10701 |
| 0.13202 | 0.94241 | 0.21046 |
| 0.06773 | 0.89926 | 0.11579 |
| 0.61377 | 0.43969 | 0.23351 |
| 0.19333 | 0.99954 | 0.10966 |
| 0.94191 | 0.00235 | 0.34822 |
| 0.69348 | 0.49331 | 0.16493 |
| 0.44406 | 0.50274 | 0.34629 |
| 0.80720 | 0.99893 | 0.10501 |
| 0.06440 | 0.00043 | 0.34842 |
| 0.30873 | 0.50096 | 0.11500 |
| 0.56535 | 0.49637 | 0.35037 |
| 0.80919 | 0.00036 | 0.88802 |
| 0.06046 | 0.00259 | 0.65086 |
| 0.30766 | 0.49961 | 0.89507 |
| 0.55333 | 0.50448 | 0.65120 |
| 0.19466 | 0.99932 | 0.89246 |
| 0.93815 | 0.00101 | 0.65028 |
| 0.43339 | 0.49878 | 0.65451 |
| 0.00190 | 0.96082 | 0.17958 |
| 0.50262 | 0.47031 | 0.13125 |
| 0.99924 | 0.02908 | 0.13413 |
| 0.50426 | 0.53882 | 0.18134 |
| 0.00016 | 0.96110 | 0.81880 |

|         |         |         |
|---------|---------|---------|
| 0.50016 | 0.47162 | 0.86634 |
| 0.00310 | 0.02934 | 0.86606 |
| 0.49776 | 0.53972 | 0.82104 |
| 0.07443 | 0.97079 | 0.99874 |
| 0.60387 | 0.46233 | 0.99466 |
| 0.90249 | 0.03908 | 0.99487 |
| 0.42886 | 0.52900 | 0.00467 |
| 0.92756 | 0.97085 | 0.99977 |
| 0.40113 | 0.46109 | 0.00152 |
| 0.09984 | 0.03899 | 0.00508 |
| 0.57673 | 0.53034 | 0.99662 |
| 0.56794 | 0.60129 | 0.11519 |
| 0.12038 | 0.05762 | 0.23300 |
| 0.06377 | 0.10064 | 0.12268 |
| 0.63483 | 0.55841 | 0.20539 |
| 0.56286 | 0.40120 | 0.86639 |
| 0.12850 | 0.94356 | 0.77969 |
| 0.06801 | 0.90002 | 0.88150 |
| 0.62050 | 0.44494 | 0.76005 |
| 0.43118 | 0.60089 | 0.89042 |
| 0.88335 | 0.05818 | 0.76649 |
| 0.69686 | 0.49954 | 0.84611 |
| 0.78733 | 0.52188 | 0.98315 |
| 0.72777 | 0.44180 | 0.02446 |
| 0.76802 | 0.50766 | 0.85562 |
| 0.59118 | 0.50006 | 0.15383 |
| 0.00125 | 0.06891 | 0.00051 |
| 0.50195 | 0.43119 | 0.99711 |
| 0.41615 | 0.49915 | 0.16374 |
| 0.41025 | 0.50061 | 0.84607 |
| 0.91443 | 0.00024 | 0.83869 |
| 0.91212 | 0.99960 | 0.15574 |
| 0.50060 | 0.56936 | 0.00213 |
| 0.00094 | 0.93072 | 0.99862 |
| 0.08786 | 0.99990 | 0.16022 |
| 0.09016 | 0.99980 | 0.84304 |
| 0.58552 | 0.50071 | 0.83790 |

## POSCAR file for gd\_p5

POSCAR file from zrtcpeb-gd-meoh-c.res: C: 144 F: 1 H: 122 O: 66 P: 1 ZR: 12

```

34.89200000000000
 0.5792995890490465 -0.0000450140396845 0.0007649282407427
-0.0000781726227076 1.0082675674799713 0.0000166934211398
0.0004256087542374 0.0000053656439079 0.3214078049098053
144 1 122 66 1 12

```

Direct

|         |         |         |
|---------|---------|---------|
| 0.79249 | 0.88302 | 0.30317 |
| 0.64969 | 0.62476 | 0.23955 |
| 0.39310 | 0.34213 | 0.26766 |
| 0.23223 | 0.78348 | 0.43705 |
| 0.20691 | 0.81578 | 0.36695 |
| 0.15098 | 0.81004 | 0.29549 |
| 0.12247 | 0.84009 | 0.23458 |
| 0.23528 | 0.85211 | 0.37114 |
| 0.26401 | 0.34992 | 0.35091 |
| 0.11432 | 0.90869 | 0.18601 |
| 0.14898 | 0.87666 | 0.24486 |
| 0.38275 | 0.59161 | 0.81981 |
| 0.71317 | 0.62159 | 0.28698 |
| 0.20615 | 0.88242 | 0.31199 |
| 0.39606 | 0.40938 | 0.20137 |
| 0.72170 | 0.28081 | 0.44053 |
| 0.69334 | 0.31292 | 0.37479 |
| 0.64195 | 0.30676 | 0.29311 |
| 0.61266 | 0.33719 | 0.23536 |
| 0.71614 | 0.35015 | 0.39386 |
| 0.60292 | 0.40660 | 0.19568 |
| 0.63403 | 0.37425 | 0.25912 |
| 0.68615 | 0.38065 | 0.33817 |
| 0.88517 | 0.84249 | 0.25289 |
| 0.34989 | 0.62383 | 0.75838 |
| 0.36089 | 0.37711 | 0.25861 |
| 0.29601 | 0.38089 | 0.29957 |
| 0.73978 | 0.24770 | 0.37949 |
| 0.24874 | 0.74979 | 0.37808 |
| 0.25510 | 0.24952 | 0.62253 |
| 0.74413 | 0.75187 | 0.62049 |
| 0.25313 | 0.75131 | 0.62348 |
| 0.75732 | 0.25154 | 0.62425 |
| 0.75045 | 0.75183 | 0.37533 |
| 0.20655 | 0.18457 | 0.63209 |
| 0.24707 | 0.25084 | 0.37660 |
| 0.29167 | 0.61880 | 0.69374 |
| 0.76686 | 0.78504 | 0.43679 |
| 0.22904 | 0.21777 | 0.43769 |
| 0.20109 | 0.18533 | 0.37161 |

|         |         |          |
|---------|---------|----------|
| 0.14177 | 0.19041 | 0.30926  |
| 0.11151 | 0.15987 | 0.25363  |
| 0.23056 | 0.14929 | 0.37312  |
| 0.10555 | 0.09142 | 0.20272  |
| 0.13951 | 0.12363 | 0.26135  |
| 0.23444 | 0.78419 | 0.56286  |
| 0.19956 | 0.11844 | 0.32018  |
| 0.79403 | 0.81744 | 0.36883  |
| 0.20810 | 0.81678 | 0.63164  |
| 0.14516 | 0.81264 | 0.68251  |
| 0.11546 | 0.84269 | 0.74187  |
| 0.24148 | 0.85136 | 0.64500  |
| 0.11279 | 0.90975 | 0.80764  |
| 0.23313 | 0.21711 | 0.56324  |
| 0.14755 | 0.87779 | 0.74846  |
| 0.21094 | 0.88200 | 0.70080  |
| 0.76201 | 0.85261 | 0.36004  |
| 0.73026 | 0.28270 | 0.56549  |
| 0.14340 | 0.18821 | 0.68243  |
| 0.70254 | 0.31552 | 0.63215  |
| 0.63391 | 0.31630 | 0.64976  |
| 0.60393 | 0.34740 | 0.70294  |
| 0.88911 | 0.90986 | 0.19072  |
| 0.74045 | 0.34649 | 0.67039  |
| 0.73082 | 0.71862 | 0.43333  |
| 0.60662 | 0.41183 | 0.79062  |
| 0.64154 | 0.37927 | 0.73358  |
| 0.71001 | 0.37875 | 0.71732  |
| 0.85447 | 0.87806 | 0.25051  |
| 0.97014 | 0.56983 | -0.06338 |
| 0.92154 | 0.50635 | 0.97785  |
| 0.90650 | 0.55823 | 0.12584  |
| 0.77464 | 0.21824 | 0.56330  |
| 0.11389 | 0.15776 | 0.74019  |
| 0.80366 | 0.18606 | 0.62846  |
| 0.86176 | 0.19135 | 0.69428  |
| 0.89189 | 0.16075 | 0.74977  |
| 0.77531 | 0.14972 | 0.62295  |
| 0.70645 | 0.68627 | 0.36098  |
| 0.89807 | 0.09207 | 0.79855  |
| 0.86481 | 0.12435 | 0.73893  |
| 0.80604 | 0.11891 | 0.67629  |
| 0.24022 | 0.15003 | 0.64416  |
| 0.11224 | 0.09047 | 0.80501  |
| 0.14626 | 0.12273 | 0.74563  |
| 0.20979 | 0.11904 | 0.69812  |
| 0.72698 | 0.71872 | 0.55913  |
| 0.69997 | 0.68641 | 0.62711  |
| 0.26940 | 0.71755 | 0.56451  |
| 0.64372 | 0.68956 | 0.30941  |
| 0.64734 | 0.69275 | 0.70647  |
| 0.61784 | 0.66273 | 0.76660  |
| 0.72341 | 0.64923 | 0.61258  |
| 0.60553 | 0.59331 | 0.80592  |
| 0.63939 | 0.62554 | 0.74613  |
| 0.69231 | 0.61904 | 0.66889  |
| 0.76415 | 0.78502 | 0.56251  |
| 0.78996 | 0.81711 | 0.63372  |
| 0.84730 | 0.81103 | 0.70105  |
| 0.87709 | 0.84075 | 0.76179  |
| 0.61604 | 0.65936 | 0.24778  |
| 0.29423 | 0.68510 | 0.63466  |
| 0.76158 | 0.85341 | 0.63344  |
| 0.88664 | 0.90916 | 0.81274  |
| 0.75740 | 0.54465 | 0.74517  |
| 0.85066 | 0.87739 | 0.75483  |
| 0.91140 | 0.54906 | -0.00703 |
| 0.84900 | 0.56210 | -0.07471 |
| 0.82125 | 0.60015 | -0.03680 |
| 0.79217 | 0.88344 | 0.69181  |
| 0.82186 | 0.44234 | -0.01716 |
| 0.85544 | 0.81256 | 0.31275  |
| 0.27334 | 0.28254 | 0.56144  |
| 0.30073 | 0.31490 | 0.62833  |
| 0.35760 | 0.30938 | 0.69744  |
| 0.38710 | 0.33979 | 0.75505  |
| 0.27271 | 0.35129 | 0.62221  |
| 0.39394 | 0.40854 | 0.80288  |
| 0.35166 | 0.69007 | 0.70273  |
| 0.36061 | 0.37631 | 0.74309  |
| 0.26952 | 0.28317 | 0.43583  |
| 0.30281 | 0.38193 | 0.67775  |
| 0.74191 | 0.65248 | 0.34430  |
| 0.76616 | 0.21640 | 0.43839  |
| 0.79336 | 0.18389 | 0.36961  |
| 0.85822 | 0.18704 | 0.32654  |
| 0.29744 | 0.31553 | 0.36755  |
| 0.88819 | 0.15677 | 0.26854  |

|         |         |         |
|---------|---------|---------|
| 0.75871 | 0.14998 | 0.35088 |
| 0.88912 | 0.09015 | 0.19663 |
| 0.37901 | 0.65983 | 0.76453 |
| 0.85463 | 0.12227 | 0.25632 |
| 0.78964 | 0.11904 | 0.29733 |
| 0.61563 | 0.59227 | 0.18102 |
| 0.36205 | 0.31184 | 0.32376 |
| 0.26717 | 0.71687 | 0.43871 |
| 0.29275 | 0.68422 | 0.36950 |
| 0.35404 | 0.68866 | 0.31267 |
| 0.38309 | 0.65850 | 0.25286 |
| 0.26015 | 0.64923 | 0.36109 |
| 0.38705 | 0.59091 | 0.19298 |
| 0.35207 | 0.62301 | 0.25123 |
| 0.26365 | 0.64935 | 0.63399 |
| 0.29012 | 0.61858 | 0.30448 |
| 0.79903 | 0.48160 | 0.74947 |
| 0.79428 | 0.34591 | 0.65815 |
| 0.55063 | 0.34777 | 0.72052 |
| 0.60416 | 0.29200 | 0.62064 |
| 0.73921 | 0.59441 | 0.27936 |
| 0.23573 | 0.90957 | 0.70878 |
| 0.29195 | 0.85428 | 0.61055 |
| 0.06645 | 0.83985 | 0.78261 |
| 0.11930 | 0.78544 | 0.67299 |
| 0.79243 | 0.65029 | 0.37876 |
| 0.28215 | 0.41064 | 0.67208 |
| 0.22661 | 0.35534 | 0.57316 |
| 0.43155 | 0.33615 | 0.80942 |
| 0.56711 | 0.66155 | 0.20684 |
| 0.37930 | 0.28089 | 0.70273 |
| 0.73513 | 0.24692 | 0.28214 |
| 0.61626 | 0.71619 | 0.32029 |
| 0.77147 | 0.91217 | 0.68813 |
| 0.71511 | 0.85816 | 0.58610 |
| 0.92220 | 0.83647 | 0.81383 |
| 0.86933 | 0.78258 | 0.70245 |
| 0.24794 | 0.74935 | 0.28033 |
| 0.70737 | 0.58968 | 0.65224 |
| 0.76619 | 0.64403 | 0.55532 |
| 0.57666 | 0.66723 | 0.82854 |
| 0.62863 | 0.72176 | 0.71800 |
| 0.23486 | 0.09151 | 0.70375 |
| 0.29063 | 0.14739 | 0.60926 |
| 0.06473 | 0.16018 | 0.78059 |
| 0.11716 | 0.21532 | 0.67380 |
| 0.70293 | 0.40988 | 0.35253 |
| 0.75817 | 0.35485 | 0.45307 |
| 0.57253 | 0.33319 | 0.17122 |
| 0.62413 | 0.27774 | 0.27809 |
| 0.22685 | 0.91111 | 0.31810 |
| 0.28077 | 0.85652 | 0.42169 |
| 0.07832 | 0.83619 | 0.17968 |
| 0.12889 | 0.78162 | 0.29136 |
| 0.26605 | 0.59071 | 0.30169 |
| 0.21082 | 0.64602 | 0.40015 |
| 0.43095 | 0.66146 | 0.20805 |
| 0.37931 | 0.71615 | 0.31828 |
| 0.74238 | 0.75167 | 0.71822 |
| 0.76372 | 0.09191 | 0.28702 |
| 0.70729 | 0.14761 | 0.38105 |
| 0.93855 | 0.15894 | 0.23311 |
| 0.88532 | 0.21364 | 0.34042 |
| 0.25720 | 0.24936 | 0.72021 |
| 0.22134 | 0.08996 | 0.32285 |
| 0.27847 | 0.14561 | 0.41659 |
| 0.06529 | 0.16322 | 0.20416 |
| 0.11889 | 0.21863 | 0.30751 |
| 0.71551 | 0.51795 | 0.15339 |
| 0.57258 | 0.49824 | 0.57488 |
| 0.28520 | 0.52197 | 0.86405 |
| 0.41993 | 0.49824 | 0.42044 |
| 0.51019 | 0.49851 | 0.35645 |
| 0.57819 | 0.47005 | 0.35993 |
| 0.49233 | 0.50052 | 0.64415 |
| 0.41715 | 0.47276 | 0.63561 |
| 0.36176 | 0.44460 | 0.00369 |
| 0.50138 | 0.55389 | 0.25464 |
| 0.49734 | 0.55504 | 0.74792 |
| 0.64603 | 0.44883 | 0.99252 |
| 0.30359 | 0.50075 | 0.01737 |
| 0.29576 | 0.52650 | 0.14354 |
| 0.08053 | 0.02490 | 0.37887 |
| 0.21779 | 0.02177 | 0.86308 |
| 0.19758 | 0.99898 | 0.00478 |
| 0.99609 | 0.00202 | 0.35620 |
| 0.78399 | 0.02147 | 0.13542 |
| 0.80466 | 0.99938 | 0.99532 |

|          |         |          |
|----------|---------|----------|
| 0.92224  | 0.02558 | 0.62088  |
| 0.00613  | 0.00231 | 0.64330  |
| 0.13883  | 0.05530 | 0.00726  |
| 0.86355  | 0.05554 | 0.99345  |
| 0.00124  | 0.94456 | 0.24987  |
| 0.00048  | 0.94490 | 0.74887  |
| 0.21122  | 0.97545 | 0.13948  |
| 0.92196  | 0.99075 | 0.41888  |
| 0.79085  | 0.97672 | 0.85727  |
| 0.08024  | 0.99050 | 0.58130  |
| 0.27122  | 0.40841 | 0.29016  |
| 0.21255  | 0.35258 | 0.38058  |
| 0.44327  | 0.33954 | 0.23157  |
| 0.38809  | 0.28481 | 0.33588  |
| 0.76258  | 0.25236 | 0.72149  |
| 0.76884  | 0.91097 | 0.29804  |
| 0.71248  | 0.85600 | 0.39810  |
| 0.93309  | 0.83923 | 0.20844  |
| 0.88023  | 0.78494 | 0.31903  |
| 0.25401  | 0.75175 | 0.72121  |
| 0.26925  | 0.59049 | 0.69029  |
| 0.21716  | 0.64562 | 0.58587  |
| 0.42421  | 0.66313 | 0.81701  |
| 0.37564  | 0.71801 | 0.70383  |
| 0.75267  | 0.75202 | 0.27764  |
| 0.78500  | 0.09027 | 0.67133  |
| 0.72832  | 0.14589 | 0.57646  |
| 0.93727  | 0.16416 | 0.80169  |
| 0.88393  | 0.21974 | 0.69866  |
| 0.24482  | 0.25104 | 0.27893  |
| 0.73905  | 0.40377 | 0.74263  |
| 0.72648  | 0.53411 | 0.67146  |
| 0.73184  | 0.56864 | 0.78840  |
| 0.80550  | 0.55389 | 0.70922  |
| 0.86133  | 0.56273 | 0.82898  |
| 0.85929  | 0.62252 | -0.04249 |
| 0.80380  | 0.59876 | 0.05642  |
| 0.77921  | 0.60856 | -0.09327 |
| 0.80153  | 0.41815 | 0.03480  |
| 0.71047  | 0.47332 | 0.11093  |
| 0.86165  | 0.45543 | 0.03696  |
| 0.84420  | 0.43060 | -0.09940 |
| 0.92309  | 0.49797 | 0.88294  |
| 0.96908  | 0.49794 | 0.01809  |
| 0.88181  | 0.49006 | 1.02175  |
| 0.94860  | 0.54530 | 0.17344  |
| 0.90808  | 0.58912 | 0.14248  |
| 0.86044  | 0.54681 | 0.16516  |
| -0.02370 | 0.56150 | 0.84219  |
| 0.01626  | 0.56235 | -0.01650 |
| 0.96460  | 0.60102 | -0.05972 |
| 0.43997  | 0.40013 | 0.12528  |
| 0.93859  | 0.10122 | 0.88022  |
| 0.36469  | 0.55779 | 0.79512  |
| 0.56124  | 0.60246 | 0.88148  |
| 0.13075  | 0.05666 | 0.78091  |
| 0.06675  | 0.09969 | 0.87793  |
| 0.62218  | 0.55965 | 0.77765  |
| 0.43555  | 0.39947 | 0.88274  |
| 0.86978  | 0.94320 | 0.78805  |
| 0.93356  | 0.90020 | 0.11611  |
| 0.37985  | 0.44308 | 0.23064  |
| 0.93355  | 0.89964 | 0.88193  |
| 0.37888  | 0.44230 | 0.77210  |
| 0.43484  | 0.60030 | 0.12530  |
| 0.87027  | 0.05629 | 0.21933  |
| 0.93513  | 0.09959 | 0.12519  |
| 0.36878  | 0.55698 | 0.21530  |
| 0.87359  | 0.94380 | 0.21870  |
| 0.56762  | 0.39773 | 0.10632  |
| 0.13185  | 0.94262 | 0.21081  |
| 0.06768  | 0.89946 | 0.11589  |
| 0.61454  | 0.44003 | 0.23245  |
| 0.19340  | 0.99952 | 0.11003  |
| 0.94164  | 0.00260 | 0.34850  |
| 0.69345  | 0.49342 | 0.16102  |
| 0.44441  | 0.50281 | 0.34687  |
| 0.80718  | 0.99914 | 0.10514  |
| 0.06409  | 0.00054 | 0.34883  |
| 0.30796  | 0.50094 | 0.11650  |
| 0.56547  | 0.49684 | 0.34928  |
| 0.80917  | 0.00049 | 0.88814  |
| 0.06063  | 0.00275 | 0.65106  |
| 0.30614  | 0.49921 | 0.89653  |
| 0.55064  | 0.50388 | 0.65043  |
| 0.19466  | 0.99933 | 0.89277  |
| 0.93825  | 0.00108 | 0.65056  |
| 0.43074  | 0.49882 | 0.65473  |

|         |          |          |
|---------|----------|----------|
| 0.00177 | 0.96095  | 0.17990  |
| 0.50230 | 0.47057  | 0.13149  |
| 0.99915 | 0.02921  | 0.13443  |
| 0.50378 | 0.53908  | 0.18128  |
| 0.00016 | 0.96121  | 0.81903  |
| 0.49876 | 0.47177  | 0.86611  |
| 0.00316 | 0.02947  | 0.86648  |
| 0.49518 | 0.53999  | 0.82085  |
| 0.07438 | 0.97090  | 0.99909  |
| 0.60259 | 0.46290  | 0.99387  |
| 0.90247 | 0.03925  | 0.99512  |
| 0.42759 | 0.52906  | 0.00540  |
| 0.92756 | 0.97104  | -0.00000 |
| 0.40048 | 0.46109  | 0.00267  |
| 0.09986 | 0.03905  | 0.00551  |
| 0.57516 | 0.53084  | 0.99558  |
| 0.56738 | 0.60147  | 0.11468  |
| 0.12041 | 0.05759  | 0.23336  |
| 0.06377 | 0.10063  | 0.12313  |
| 0.63532 | 0.55859  | 0.20235  |
| 0.56307 | 0.40184  | 0.86615  |
| 0.12848 | 0.94367  | 0.77996  |
| 0.06794 | 0.90012  | 0.88165  |
| 0.62160 | 0.44565  | 0.76162  |
| 0.42820 | 0.60077  | 0.89235  |
| 0.88360 | 0.05834  | 0.76655  |
| 0.69338 | 0.50291  | 0.85081  |
| 0.79517 | 0.53493  | 0.94210  |
| 0.77291 | 0.46898  | -0.04835 |
| 0.76582 | 0.50662  | 0.84875  |
| 0.59091 | 0.50044  | 0.15264  |
| 0.00123 | 0.06909  | 0.00093  |
| 0.50176 | 0.43145  | 0.99737  |
| 0.41571 | 0.49926  | 0.16428  |
| 0.40854 | 0.50060  | 0.84698  |
| 0.91450 | 0.00042  | 0.83880  |
| 0.91193 | 0.99978  | 0.15603  |
| 0.49906 | 0.56968  | 0.00218  |
| 0.00086 | 0.93084  | 0.99887  |
| 0.08777 | -0.00000 | 0.16070  |
| 0.09029 | 0.99989  | 0.84339  |
| 0.58349 | 0.50134  | 0.83682  |

## POSCAR file for gd\_p5\_prime

POSCAR file from zrtpb-gd-meoh-c.res: C: 144 F: 1 H: 122 O: 66 P: 1 ZR: 12

```

34.89200000000000
0.5792995890490465 -0.0000450140396845 0.0007649282407427
-0.0000781726227076 1.0082675674799713 0.0000166934211398
0.0004256087542374 0.0000053656439079 0.3214078049098053
144 1 122 66 1 12

```

Direct

|         |         |         |
|---------|---------|---------|
| 0.79240 | 0.88339 | 0.30245 |
| 0.64862 | 0.62582 | 0.23914 |
| 0.39752 | 0.34302 | 0.27472 |
| 0.23146 | 0.78353 | 0.43695 |
| 0.20649 | 0.81587 | 0.36654 |
| 0.15202 | 0.80996 | 0.29157 |
| 0.12350 | 0.84007 | 0.23084 |
| 0.23349 | 0.85249 | 0.37420 |
| 0.26589 | 0.34921 | 0.34570 |
| 0.11372 | 0.90895 | 0.18596 |
| 0.14858 | 0.87686 | 0.24446 |
| 0.38045 | 0.59152 | 0.82085 |
| 0.71450 | 0.62409 | 0.27557 |
| 0.20444 | 0.88280 | 0.31493 |
| 0.39843 | 0.40957 | 0.20144 |
| 0.72318 | 0.28210 | 0.43707 |
| 0.69680 | 0.31465 | 0.37036 |
| 0.64554 | 0.30927 | 0.28811 |
| 0.61787 | 0.34011 | 0.22990 |
| 0.72142 | 0.35152 | 0.38900 |
| 0.60905 | 0.40933 | 0.19159 |
| 0.64092 | 0.37689 | 0.25306 |
| 0.69339 | 0.38247 | 0.33184 |
| 0.88561 | 0.84315 | 0.25266 |
| 0.34704 | 0.62367 | 0.76012 |
| 0.36375 | 0.37731 | 0.25959 |
| 0.29768 | 0.38032 | 0.29475 |
| 0.74150 | 0.24891 | 0.37679 |
| 0.24828 | 0.74976 | 0.37852 |
| 0.25621 | 0.24968 | 0.62203 |
| 0.74231 | 0.75279 | 0.61968 |
| 0.25137 | 0.75146 | 0.62395 |
| 0.75704 | 0.25283 | 0.62217 |
| 0.75150 | 0.75232 | 0.37459 |
| 0.20675 | 0.18489 | 0.63114 |

|         |         |          |
|---------|---------|----------|
| 0.24922 | 0.25093 | 0.37593  |
| 0.28870 | 0.61877 | 0.69568  |
| 0.76755 | 0.78554 | 0.43633  |
| 0.23024 | 0.21802 | 0.43696  |
| 0.20203 | 0.18565 | 0.37094  |
| 0.14383 | 0.19110 | 0.30556  |
| 0.11322 | 0.16064 | 0.25011  |
| 0.23009 | 0.14926 | 0.37559  |
| 0.10536 | 0.09195 | 0.20245  |
| 0.13977 | 0.12411 | 0.26077  |
| 0.23319 | 0.78432 | 0.56276  |
| 0.19879 | 0.11854 | 0.32254  |
| 0.79478 | 0.81790 | 0.36864  |
| 0.20694 | 0.81705 | 0.63122  |
| 0.14295 | 0.81356 | 0.67810  |
| 0.11361 | 0.84366 | 0.73781  |
| 0.24154 | 0.85104 | 0.64845  |
| 0.11250 | 0.91028 | 0.80749  |
| 0.23389 | 0.21738 | 0.56255  |
| 0.14700 | 0.87825 | 0.74806  |
| 0.21128 | 0.88186 | 0.70395  |
| 0.76234 | 0.85294 | 0.35972  |
| 0.73014 | 0.28385 | 0.56233  |
| 0.14257 | 0.18817 | 0.67728  |
| 0.70162 | 0.31666 | 0.62748  |
| 0.63253 | 0.31883 | 0.63604  |
| 0.60246 | 0.34983 | 0.68967  |
| 0.88876 | 0.91043 | 0.18976  |
| 0.73986 | 0.34636 | 0.67356  |
| 0.73015 | 0.71949 | 0.43243  |
| 0.60674 | 0.41266 | 0.78895  |
| 0.64088 | 0.38032 | 0.72934  |
| 0.70972 | 0.37867 | 0.72065  |
| 0.85443 | 0.87858 | 0.24991  |
| 0.95721 | 0.55560 | 0.67572  |
| 0.93557 | 0.54512 | 0.89088  |
| 0.87569 | 0.59684 | -0.21685 |
| 0.77521 | 0.21957 | 0.56185  |
| 0.11294 | 0.15779 | 0.73529  |
| 0.80381 | 0.18732 | 0.62740  |
| 0.85992 | 0.19277 | 0.69857  |
| 0.88991 | 0.16210 | 0.75399  |
| 0.77712 | 0.15065 | 0.61697  |
| 0.70516 | 0.68725 | 0.36031  |
| 0.89792 | 0.09305 | 0.79777  |
| 0.86460 | 0.12544 | 0.73841  |
| 0.80759 | 0.11983 | 0.67075  |
| 0.24115 | 0.15076 | 0.64709  |
| 0.11232 | 0.09096 | 0.80488  |
| 0.14623 | 0.12314 | 0.74480  |
| 0.21060 | 0.11976 | 0.70090  |
| 0.72490 | 0.71975 | 0.55796  |
| 0.69737 | 0.68749 | 0.62512  |
| 0.26749 | 0.71759 | 0.56558  |
| 0.63965 | 0.68906 | 0.32073  |
| 0.64687 | 0.69428 | 0.70850  |
| 0.61724 | 0.66441 | 0.76897  |
| 0.71889 | 0.65005 | 0.60699  |
| 0.60322 | 0.59509 | 0.80618  |
| 0.63719 | 0.62708 | 0.74601  |
| 0.68850 | 0.62006 | 0.66550  |
| 0.76350 | 0.78573 | 0.56198  |
| 0.78922 | 0.81778 | 0.63343  |
| 0.84639 | 0.81159 | 0.70116  |
| 0.87630 | 0.84128 | 0.76185  |
| 0.61200 | 0.65893 | 0.25890  |
| 0.29168 | 0.68508 | 0.63634  |
| 0.76107 | 0.85414 | 0.63285  |
| 0.88640 | 0.90976 | 0.81205  |
| 0.83282 | 0.44874 | 0.82166  |
| 0.85016 | 0.87798 | 0.75447  |
| 0.90395 | 0.55672 | 0.77267  |
| 0.85006 | 0.52749 | 0.74019  |
| 0.80670 | 0.53797 | 0.63525  |
| 0.79179 | 0.88414 | 0.69118  |
| 0.83852 | 0.50150 | 0.09862  |
| 0.85621 | 0.81314 | 0.31255  |
| 0.27520 | 0.28257 | 0.56104  |
| 0.30228 | 0.31501 | 0.62798  |
| 0.35801 | 0.30950 | 0.69998  |
| 0.38722 | 0.34000 | 0.75767  |
| 0.27495 | 0.35151 | 0.61906  |
| 0.39464 | 0.40885 | 0.80283  |
| 0.34904 | 0.68995 | 0.70461  |
| 0.36145 | 0.37660 | 0.74315  |
| 0.27202 | 0.28314 | 0.43541  |
| 0.30466 | 0.38223 | 0.67492  |
| 0.74301 | 0.65508 | 0.33281  |



|         |         |         |
|---------|---------|---------|
| 0.76738 | 0.21766 | 0.43677 |
| 0.79475 | 0.18498 | 0.36903 |
| 0.86142 | 0.18658 | 0.33522 |
| 0.30051 | 0.31551 | 0.36784 |
| 0.89089 | 0.15618 | 0.27711 |
| 0.75807 | 0.15236 | 0.34227 |
| 0.88882 | 0.09074 | 0.19586 |
| 0.37622 | 0.65967 | 0.76644 |
| 0.85494 | 0.12292 | 0.25647 |
| 0.78841 | 0.12108 | 0.28947 |
| 0.61452 | 0.59343 | 0.18081 |
| 0.36648 | 0.31266 | 0.33050 |
| 0.26610 | 0.71683 | 0.43978 |
| 0.29201 | 0.68395 | 0.37194 |
| 0.35391 | 0.68801 | 0.31694 |
| 0.38310 | 0.65762 | 0.25862 |
| 0.25919 | 0.64902 | 0.36346 |
| 0.38647 | 0.59023 | 0.19753 |
| 0.35170 | 0.62221 | 0.25669 |
| 0.26083 | 0.64940 | 0.63596 |
| 0.28931 | 0.61809 | 0.30853 |
| 0.73731 | 0.44308 | 0.92452 |
| 0.79394 | 0.34475 | 0.66787 |
| 0.54864 | 0.35106 | 0.70060 |
| 0.60250 | 0.29561 | 0.60001 |
| 0.74301 | 0.59808 | 0.25959 |
| 0.23703 | 0.90905 | 0.71448 |
| 0.29269 | 0.85342 | 0.61693 |
| 0.06391 | 0.84125 | 0.77604 |
| 0.11603 | 0.78683 | 0.66543 |
| 0.79506 | 0.65405 | 0.35971 |
| 0.28436 | 0.41098 | 0.66724 |
| 0.22973 | 0.35563 | 0.56744 |
| 0.43093 | 0.33634 | 0.81389 |
| 0.56098 | 0.65998 | 0.22669 |
| 0.37911 | 0.28092 | 0.70764 |
| 0.73777 | 0.24804 | 0.27933 |
| 0.61023 | 0.71443 | 0.34072 |
| 0.77136 | 0.91293 | 0.68712 |
| 0.71475 | 0.85898 | 0.58516 |
| 0.92129 | 0.83695 | 0.81416 |
| 0.86826 | 0.78309 | 0.70274 |
| 0.24807 | 0.74929 | 0.28075 |
| 0.70330 | 0.59058 | 0.64911 |
| 0.75981 | 0.64449 | 0.54570 |
| 0.57733 | 0.66916 | 0.83337 |
| 0.62988 | 0.72350 | 0.72285 |
| 0.23631 | 0.09250 | 0.70929 |
| 0.29222 | 0.14840 | 0.61513 |
| 0.06308 | 0.16001 | 0.77289 |
| 0.11570 | 0.21495 | 0.66545 |
| 0.71149 | 0.41140 | 0.34711 |
| 0.76296 | 0.35569 | 0.44982 |
| 0.57733 | 0.33664 | 0.16633 |
| 0.62629 | 0.28055 | 0.27319 |
| 0.22413 | 0.91165 | 0.32368 |
| 0.27771 | 0.85717 | 0.42804 |
| 0.08033 | 0.83600 | 0.17361 |
| 0.13095 | 0.78135 | 0.28461 |
| 0.26476 | 0.59036 | 0.30539 |
| 0.20943 | 0.64609 | 0.40091 |
| 0.43125 | 0.66038 | 0.21464 |
| 0.37943 | 0.71542 | 0.32252 |
| 0.73990 | 0.75266 | 0.71735 |
| 0.76067 | 0.09486 | 0.27319 |
| 0.70551 | 0.15117 | 0.36617 |
| 0.94258 | 0.15732 | 0.24805 |
| 0.89017 | 0.21213 | 0.35590 |
| 0.25789 | 0.24953 | 0.71974 |
| 0.21955 | 0.08984 | 0.32743 |
| 0.27711 | 0.14520 | 0.42178 |
| 0.06778 | 0.16428 | 0.19855 |
| 0.12203 | 0.21958 | 0.30135 |
| 0.71152 | 0.52764 | 0.14214 |
| 0.57274 | 0.50373 | 0.56914 |
| 0.28647 | 0.52289 | 0.86871 |
| 0.42647 | 0.50134 | 0.43061 |
| 0.50187 | 0.49961 | 0.35837 |
| 0.58620 | 0.47419 | 0.36584 |
| 0.49725 | 0.50131 | 0.64100 |
| 0.41572 | 0.47350 | 0.63378 |
| 0.36295 | 0.44468 | 0.00365 |
| 0.50157 | 0.55488 | 0.25461 |
| 0.49576 | 0.55631 | 0.74850 |
| 0.64790 | 0.45245 | 0.98413 |
| 0.30420 | 0.50036 | 0.00649 |
| 0.29183 | 0.52375 | 0.14733 |
| 0.07962 | 0.02522 | 0.37913 |

|          |         |          |
|----------|---------|----------|
| 0.21771  | 0.02215 | 0.86449  |
| 0.19709  | 0.99937 | 0.00457  |
| 0.99521  | 0.00253 | 0.35537  |
| 0.78380  | 0.02200 | 0.13378  |
| 0.80452  | 0.00008 | 0.99392  |
| 0.92222  | 0.02618 | 0.61993  |
| 0.00641  | 0.00299 | 0.64309  |
| 0.13859  | 0.05572 | 0.00732  |
| 0.86336  | 0.05617 | 0.99233  |
| 0.00055  | 0.94519 | 0.24940  |
| 0.00052  | 0.94550 | 0.74839  |
| 0.21026  | 0.97585 | 0.14065  |
| 0.92101  | 0.99124 | 0.41757  |
| 0.79096  | 0.97754 | 0.85521  |
| 0.08020  | 0.99084 | 0.58151  |
| 0.27172  | 0.40729 | 0.28098  |
| 0.21362  | 0.35122 | 0.37092  |
| 0.44879  | 0.34099 | 0.24359  |
| 0.39355  | 0.28622 | 0.34718  |
| 0.76132  | 0.25374 | 0.71955  |
| 0.76839  | 0.91123 | 0.29683  |
| 0.71282  | 0.85614 | 0.39794  |
| 0.93365  | 0.84010 | 0.20853  |
| 0.88124  | 0.78559 | 0.31897  |
| 0.25192  | 0.75203 | 0.72169  |
| 0.26590  | 0.59056 | 0.69233  |
| 0.21424  | 0.64574 | 0.58807  |
| 0.42147  | 0.66293 | 0.81877  |
| 0.37312  | 0.71785 | 0.70584  |
| 0.75471  | 0.75242 | 0.27701  |
| 0.78771  | 0.09102 | 0.66207  |
| 0.73171  | 0.14655 | 0.56585  |
| 0.93393  | 0.16568 | 0.80945  |
| 0.88081  | 0.22139 | 0.70708  |
| 0.24736  | 0.25107 | 0.27824  |
| 0.73942  | 0.40272 | 0.75186  |
| 0.81437  | 0.42040 | 0.84673  |
| 0.83337  | 0.45039 | 0.72358  |
| 0.88340  | 0.45186 | 0.85695  |
| 0.87624  | 0.50055 | 0.72145  |
| 0.83648  | 0.54365 | 0.55476  |
| 0.77725  | 0.56363 | -0.34500 |
| 0.77196  | 0.51477 | 0.61431  |
| 0.82890  | 0.50196 | 0.19550  |
| 0.71967  | 0.48642 | 0.07052  |
| 0.86142  | 0.52876 | 0.07199  |
| 0.87278  | 0.47801 | 1.07804  |
| 0.95270  | 0.51530 | 0.88825  |
| 0.97882  | 0.56327 | -0.09022 |
| 0.90037  | 0.54788 | -0.03455 |
| 0.91415  | 0.61653 | -0.18435 |
| 0.85833  | 0.60766 | -0.30378 |
| 0.83392  | 0.59778 | -0.15331 |
| 0.97942  | 0.52697 | 0.66877  |
| -0.00268 | 0.57568 | -0.30229 |
| 0.93778  | 0.56352 | 0.58722  |
| 0.44218  | 0.40042 | 0.12492  |
| 0.93830  | 0.10208 | 0.87984  |
| 0.36325  | 0.55754 | 0.79586  |
| 0.55964  | 0.60406 | 0.88365  |
| 0.13109  | 0.05714 | 0.78172  |
| 0.06670  | 0.10028 | 0.87734  |
| 0.61893  | 0.56151 | 0.77608  |
| 0.43669  | 0.39995 | 0.88221  |
| 0.86966  | 0.94378 | 0.78718  |
| 0.93311  | 0.90073 | 0.11508  |
| 0.38185  | 0.44329 | 0.23001  |
| 0.93336  | 0.90017 | 0.88102  |
| 0.37932  | 0.44266 | 0.77249  |
| 0.43251  | 0.59992 | 0.12649  |
| 0.86937  | 0.05693 | 0.21737  |
| 0.93503  | 0.10019 | 0.12493  |
| 0.36969  | 0.55609 | 0.22174  |
| 0.87313  | 0.94433 | 0.21757  |
| 0.57006  | 0.40037 | 0.10754  |
| 0.13102  | 0.94285 | 0.21131  |
| 0.06717  | 0.89977 | 0.11559  |
| 0.62233  | 0.44303 | 0.22536  |
| 0.19261  | 0.99993 | 0.11096  |
| 0.94076  | 0.00318 | 0.34742  |
| 0.69822  | 0.50088 | 0.14288  |
| 0.44747  | 0.50141 | 0.35199  |
| 0.80684  | 0.99966 | 0.10321  |
| 0.06315  | 0.00093 | 0.34861  |
| 0.30957  | 0.49989 | 0.11599  |
| 0.56946  | 0.49952 | 0.34533  |
| 0.80916  | 0.00132 | 0.88624  |
| 0.06077  | 0.00340 | 0.65089  |

|         |         |          |
|---------|---------|----------|
| 0.30607 | 0.49942 | 0.89911  |
| 0.55143 | 0.50452 | 0.64738  |
| 0.19459 | 0.99967 | 0.89384  |
| 0.93825 | 0.00173 | 0.64993  |
| 0.42980 | 0.49944 | 0.65329  |
| 0.00118 | 0.96148 | 0.17922  |
| 0.50279 | 0.47144 | 0.13056  |
| 0.99871 | 0.02983 | 0.13388  |
| 0.50253 | 0.53958 | 0.18220  |
| 0.00006 | 0.96182 | 0.81852  |
| 0.50019 | 0.47255 | 0.86600  |
| 0.00309 | 0.03014 | 0.86587  |
| 0.49452 | 0.54084 | 0.82055  |
| 0.07413 | 0.97137 | 0.99898  |
| 0.60423 | 0.46451 | 0.99417  |
| 0.90230 | 0.03992 | 0.99395  |
| 0.42711 | 0.52921 | 0.00510  |
| 0.92720 | 0.97160 | -0.00108 |
| 0.40153 | 0.46129 | 0.00192  |
| 0.09955 | 0.03954 | 0.00551  |
| 0.57358 | 0.53190 | 0.99647  |
| 0.56496 | 0.60236 | 0.11745  |
| 0.11971 | 0.05813 | 0.23357  |
| 0.06375 | 0.10123 | 0.12263  |
| 0.63506 | 0.55972 | 0.20003  |
| 0.56442 | 0.40238 | 0.86683  |
| 0.12842 | 0.94418 | 0.78018  |
| 0.06755 | 0.90062 | 0.88124  |
| 0.62130 | 0.44653 | 0.76107  |
| 0.42593 | 0.60083 | 0.89322  |
| 0.88372 | 0.05936 | 0.76516  |
| 0.71112 | 0.49442 | 0.81414  |
| 0.80798 | 0.52219 | 0.84336  |
| 0.77674 | 0.49622 | 1.03968  |
| 0.77289 | 0.48274 | 0.88408  |
| 0.58881 | 0.50144 | 0.15485  |
| 0.00103 | 0.06977 | 0.00042  |
| 0.50303 | 0.43195 | 0.99586  |
| 0.41441 | 0.49973 | 0.16178  |
| 0.41026 | 0.50057 | 0.84443  |
| 0.91442 | 0.00114 | 0.83777  |
| 0.91155 | 0.00036 | 0.15472  |
| 0.49780 | 0.57056 | 0.00212  |
| 0.00056 | 0.93137 | 0.99837  |
| 0.08729 | 0.00047 | 0.16074  |
| 0.09006 | 0.00042 | 0.84362  |
| 0.58605 | 0.50330 | 0.83661  |

## POSCAR file for gd\_product

POSCAR file from zrtepb-gd-meoh-c.res: C: 144 F: 1 H: 122 O: 66 P: 1 ZR: 12  
 34.89200000000000

|                     |                     |                    |
|---------------------|---------------------|--------------------|
| 0.5792995890490465  | -0.0000450140396845 | 0.0007649282407427 |
| -0.0000781726227076 | 1.0082675674799713  | 0.0000166934211398 |
| 0.0004256087542374  | 0.0000053656439079  | 0.3214078049098053 |

144 1 122 66 1 12

Direct

|         |         |         |
|---------|---------|---------|
| 0.79214 | 0.88385 | 0.30130 |
| 0.64642 | 0.62600 | 0.24569 |
| 0.39769 | 0.34425 | 0.27633 |
| 0.23175 | 0.78336 | 0.43658 |
| 0.20670 | 0.81578 | 0.36646 |
| 0.15308 | 0.80985 | 0.28963 |
| 0.12469 | 0.84000 | 0.22888 |
| 0.23300 | 0.85251 | 0.37618 |
| 0.26447 | 0.34796 | 0.33910 |
| 0.11423 | 0.90897 | 0.18593 |
| 0.14902 | 0.87688 | 0.24445 |
| 0.38842 | 0.59220 | 0.81415 |
| 0.71421 | 0.62690 | 0.26831 |
| 0.20404 | 0.88288 | 0.31700 |
| 0.39473 | 0.40968 | 0.19416 |
| 0.71797 | 0.27963 | 0.43429 |
| 0.69257 | 0.31226 | 0.36668 |
| 0.64363 | 0.30707 | 0.28003 |
| 0.61617 | 0.33820 | 0.22295 |
| 0.71583 | 0.34912 | 0.39031 |
| 0.60471 | 0.40761 | 0.19379 |
| 0.63721 | 0.37493 | 0.25199 |
| 0.68803 | 0.38032 | 0.33432 |
| 0.88578 | 0.84351 | 0.25538 |
| 0.35360 | 0.62422 | 0.75539 |
| 0.36162 | 0.37742 | 0.25520 |
| 0.29487 | 0.37926 | 0.28665 |
| 0.73940 | 0.24698 | 0.37478 |
| 0.24933 | 0.74980 | 0.37788 |
| 0.25699 | 0.25007 | 0.62201 |

|         |         |         |
|---------|---------|---------|
| 0.74183 | 0.75333 | 0.62126 |
| 0.25187 | 0.75113 | 0.62330 |
| 0.75024 | 0.25081 | 0.62116 |
| 0.74884 | 0.75340 | 0.37593 |
| 0.20694 | 0.18531 | 0.63181 |
| 0.25014 | 0.25071 | 0.37587 |
| 0.29487 | 0.61876 | 0.69255 |
| 0.76615 | 0.78636 | 0.43772 |
| 0.23071 | 0.21803 | 0.43760 |
| 0.20241 | 0.18554 | 0.37219 |
| 0.14602 | 0.19120 | 0.30207 |
| 0.11552 | 0.16075 | 0.24634 |
| 0.22880 | 0.14884 | 0.38158 |
| 0.10611 | 0.09187 | 0.20281 |
| 0.14035 | 0.12398 | 0.26145 |
| 0.23309 | 0.78395 | 0.56234 |
| 0.19759 | 0.11813 | 0.32824 |
| 0.79406 | 0.81859 | 0.36997 |
| 0.20656 | 0.81666 | 0.63060 |
| 0.14166 | 0.81380 | 0.67361 |
| 0.11249 | 0.84402 | 0.73297 |
| 0.24214 | 0.85016 | 0.65111 |
| 0.11302 | 0.91019 | 0.80684 |
| 0.23432 | 0.21773 | 0.56310 |
| 0.14710 | 0.87811 | 0.74691 |
| 0.21221 | 0.88110 | 0.70641 |
| 0.76164 | 0.85356 | 0.35875 |
| 0.72210 | 0.28120 | 0.55986 |
| 0.14115 | 0.18753 | 0.67049 |
| 0.69301 | 0.31399 | 0.62360 |
| 0.62467 | 0.32045 | 0.61591 |
| 0.59624 | 0.35223 | 0.66833 |
| 0.88906 | 0.91056 | 0.18960 |
| 0.73230 | 0.33997 | 0.68573 |
| 0.72713 | 0.72070 | 0.43399 |
| 0.60609 | 0.41200 | 0.78762 |
| 0.63650 | 0.37909 | 0.72446 |
| 0.70439 | 0.37276 | 0.73334 |
| 0.85454 | 0.87889 | 0.25033 |
| 0.94128 | 0.57189 | 0.71793 |
| 0.95214 | 0.53776 | 0.90928 |
| 0.87574 | 0.59332 | 0.89537 |
| 0.77222 | 0.21823 | 0.56155 |
| 0.11164 | 0.15705 | 0.72821 |
| 0.80195 | 0.18643 | 0.62782 |
| 0.85572 | 0.19272 | 0.70392 |
| 0.88666 | 0.16239 | 0.75971 |
| 0.77840 | 0.14923 | 0.61266 |
| 0.70178 | 0.68844 | 0.36254 |
| 0.89887 | 0.09318 | 0.79821 |
| 0.86464 | 0.12526 | 0.73942 |
| 0.80982 | 0.11879 | 0.66673 |
| 0.24293 | 0.15211 | 0.65435 |
| 0.11319 | 0.09100 | 0.80457 |
| 0.14682 | 0.12326 | 0.74442 |
| 0.21267 | 0.12091 | 0.70756 |
| 0.72316 | 0.72055 | 0.55959 |
| 0.69739 | 0.68772 | 0.62662 |
| 0.26912 | 0.71750 | 0.56459 |
| 0.63411 | 0.68761 | 0.33720 |
| 0.65115 | 0.69352 | 0.71831 |
| 0.62448 | 0.66299 | 0.78001 |
| 0.71672 | 0.65041 | 0.59999 |
| 0.61238 | 0.59345 | 0.81421 |
| 0.64277 | 0.62586 | 0.74996 |
| 0.68871 | 0.61978 | 0.65905 |
| 0.76294 | 0.78628 | 0.56332 |
| 0.78915 | 0.81823 | 0.63449 |
| 0.84575 | 0.81184 | 0.70359 |
| 0.87590 | 0.84153 | 0.76382 |
| 0.60688 | 0.65704 | 0.27696 |
| 0.29478 | 0.68520 | 0.63475 |
| 0.76173 | 0.85478 | 0.63224 |
| 0.88699 | 0.91009 | 0.81186 |
| 0.81225 | 0.44803 | 0.80378 |
| 0.85050 | 0.87838 | 0.75478 |
| 0.90356 | 0.55895 | 0.82902 |
| 0.84753 | 0.53154 | 0.79106 |
| 0.79471 | 0.54973 | 0.71493 |
| 0.79263 | 0.88475 | 0.69029 |
| 0.80088 | 0.45626 | 0.12925 |
| 0.85603 | 0.81374 | 0.31596 |
| 0.27633 | 0.28275 | 0.56027 |
| 0.30365 | 0.31548 | 0.62573 |
| 0.35904 | 0.31020 | 0.69858 |
| 0.38871 | 0.34097 | 0.75403 |
| 0.27716 | 0.35208 | 0.61353 |
| 0.39761 | 0.40992 | 0.79449 |

|         |         |         |
|---------|---------|---------|
| 0.35249 | 0.69063 | 0.70166 |
| 0.36382 | 0.37762 | 0.73623 |
| 0.27315 | 0.28298 | 0.43473 |
| 0.30740 | 0.38308 | 0.66695 |
| 0.74195 | 0.65853 | 0.32328 |
| 0.76639 | 0.21634 | 0.43626 |
| 0.79555 | 0.18400 | 0.36981 |
| 0.86383 | 0.18409 | 0.34866 |
| 0.30107 | 0.31537 | 0.36650 |
| 0.89374 | 0.15385 | 0.29047 |
| 0.75772 | 0.15307 | 0.33147 |
| 0.88986 | 0.09026 | 0.19654 |
| 0.38138 | 0.66056 | 0.76203 |
| 0.85616 | 0.12219 | 0.25794 |
| 0.78810 | 0.12177 | 0.27907 |
| 0.61304 | 0.59324 | 0.18830 |
| 0.36792 | 0.31379 | 0.33381 |
| 0.26778 | 0.71689 | 0.43880 |
| 0.29349 | 0.68415 | 0.36999 |
| 0.35476 | 0.68833 | 0.31277 |
| 0.38329 | 0.65807 | 0.25259 |
| 0.26059 | 0.64922 | 0.36178 |
| 0.38608 | 0.59061 | 0.19070 |
| 0.35188 | 0.62267 | 0.25085 |
| 0.26525 | 0.64915 | 0.63447 |
| 0.29006 | 0.61845 | 0.30487 |
| 0.65312 | 0.42354 | 1.03459 |
| 0.78571 | 0.33499 | 0.69273 |
| 0.54256 | 0.35650 | 0.66582 |
| 0.59382 | 0.29997 | 0.56779 |
| 0.74508 | 0.60267 | 0.24236 |
| 0.23883 | 0.90788 | 0.71968 |
| 0.29384 | 0.85201 | 0.62223 |
| 0.06203 | 0.84210 | 0.76810 |
| 0.11395 | 0.78749 | 0.65834 |
| 0.79528 | 0.65958 | 0.34038 |
| 0.28783 | 0.41190 | 0.65632 |
| 0.23235 | 0.35611 | 0.56068 |
| 0.43218 | 0.33745 | 0.81095 |
| 0.55419 | 0.65620 | 0.25496 |
| 0.37963 | 0.28158 | 0.70873 |
| 0.73774 | 0.24619 | 0.27710 |
| 0.60284 | 0.71125 | 0.36670 |
| 0.77278 | 0.91366 | 0.68514 |
| 0.71576 | 0.85973 | 0.58355 |
| 0.92055 | 0.83709 | 0.81701 |
| 0.86695 | 0.78320 | 0.70653 |
| 0.24921 | 0.74940 | 0.28010 |
| 0.70175 | 0.59060 | 0.63541 |
| 0.75400 | 0.64537 | 0.53122 |
| 0.58822 | 0.66711 | 0.85146 |
| 0.63512 | 0.72254 | 0.73901 |
| 0.23984 | 0.09434 | 0.72111 |
| 0.29502 | 0.15060 | 0.62758 |
| 0.06050 | 0.15853 | 0.76018 |
| 0.11301 | 0.21356 | 0.65331 |
| 0.70473 | 0.40929 | 0.35348 |
| 0.75555 | 0.35304 | 0.45523 |
| 0.57724 | 0.33497 | 0.15605 |
| 0.62575 | 0.27829 | 0.26095 |
| 0.22312 | 0.91181 | 0.32750 |
| 0.27660 | 0.85726 | 0.43159 |
| 0.08220 | 0.83588 | 0.17002 |
| 0.13254 | 0.78115 | 0.28101 |
| 0.26547 | 0.59074 | 0.30185 |
| 0.21122 | 0.64620 | 0.40085 |
| 0.43093 | 0.66096 | 0.20690 |
| 0.38035 | 0.71573 | 0.31807 |
| 0.74066 | 0.75304 | 0.71902 |
| 0.75918 | 0.09676 | 0.25341 |
| 0.70413 | 0.15319 | 0.34659 |
| 0.94680 | 0.15392 | 0.27061 |
| 0.89335 | 0.20836 | 0.37880 |
| 0.25859 | 0.25015 | 0.71972 |
| 0.21713 | 0.08924 | 0.33672 |
| 0.27444 | 0.14449 | 0.43178 |
| 0.07149 | 0.16462 | 0.19108 |
| 0.12548 | 0.21991 | 0.29411 |
| 0.70224 | 0.52772 | 0.19349 |
| 0.58445 | 0.49760 | 0.58057 |
| 0.29344 | 0.52556 | 0.85529 |
| 0.42023 | 0.50568 | 0.42521 |
| 0.49499 | 0.49837 | 0.35786 |
| 0.57877 | 0.47240 | 0.36939 |
| 0.50887 | 0.50284 | 0.64326 |
| 0.42617 | 0.47517 | 0.62545 |
| 0.36355 | 0.44536 | 0.99269 |
| 0.49939 | 0.55407 | 0.25498 |

|         |         |         |
|---------|---------|---------|
| 0.50591 | 0.55656 | 0.75010 |
| 0.64669 | 0.44826 | 0.98994 |
| 0.30574 | 0.50162 | 0.98622 |
| 0.28944 | 0.52403 | 0.13518 |
| 0.08001 | 0.02526 | 0.37886 |
| 0.21868 | 0.02192 | 0.86405 |
| 0.19789 | 0.99926 | 0.00614 |
| 0.99549 | 0.00240 | 0.35551 |
| 0.78393 | 0.02181 | 0.13244 |
| 0.80515 | 0.00032 | 0.99338 |
| 0.92395 | 0.02662 | 0.62012 |
| 0.00742 | 0.00302 | 0.64283 |
| 0.13947 | 0.05572 | 0.00761 |
| 0.86430 | 0.05630 | 0.99165 |
| 0.00098 | 0.94519 | 0.24930 |
| 0.00138 | 0.94575 | 0.74786 |
| 0.21099 | 0.97563 | 0.14057 |
| 0.92128 | 0.99150 | 0.41790 |
| 0.79124 | 0.97839 | 0.85277 |
| 0.08152 | 0.99098 | 0.58143 |
| 0.26732 | 0.40544 | 0.26868 |
| 0.21172 | 0.34896 | 0.36165 |
| 0.44958 | 0.34312 | 0.24828 |
| 0.39658 | 0.28826 | 0.35506 |
| 0.75271 | 0.25179 | 0.71878 |
| 0.76815 | 0.91166 | 0.29428 |
| 0.71177 | 0.85687 | 0.39538 |
| 0.93413 | 0.84028 | 0.21245 |
| 0.88109 | 0.78625 | 0.32405 |
| 0.25227 | 0.75158 | 0.72106 |
| 0.27316 | 0.59027 | 0.68891 |
| 0.21842 | 0.64500 | 0.58775 |
| 0.42686 | 0.66428 | 0.81343 |
| 0.37549 | 0.71883 | 0.70300 |
| 0.75147 | 0.75352 | 0.27828 |
| 0.79241 | 0.08960 | 0.65424 |
| 0.73494 | 0.14439 | 0.55686 |
| 0.92890 | 0.16668 | 0.81911 |
| 0.87413 | 0.22176 | 0.71624 |
| 0.24844 | 0.25066 | 0.27817 |
| 0.73429 | 0.39346 | 0.78163 |
| 0.81478 | 0.41945 | 0.84276 |
| 0.78530 | 0.44628 | 0.71860 |
| 0.86248 | 0.45878 | 0.78697 |
| 0.87247 | 0.50872 | 0.73869 |
| 0.81652 | 0.56436 | 0.63728 |
| 0.76623 | 0.57026 | 0.76835 |
| 0.75914 | 0.52840 | 0.68250 |
| 0.78113 | 0.43511 | 0.19248 |
| 0.72745 | 0.48791 | 0.13026 |
| 0.80464 | 0.48435 | 0.17224 |
| 0.85029 | 0.44741 | 0.09855 |
| 0.96864 | 0.51087 | 0.86766 |
| 0.99647 | 0.55535 | 0.92535 |
| 0.92980 | 0.53095 | 0.99620 |
| 0.91639 | 0.61095 | 0.93082 |
| 0.84549 | 0.61145 | 0.83659 |
| 0.84438 | 0.58418 | 0.97083 |
| 0.96083 | 0.54727 | 0.66766 |
| 0.98386 | 0.58964 | 0.74420 |
| 0.91031 | 0.58890 | 0.65724 |
| 0.43831 | 0.40035 | 0.11762 |
| 0.93905 | 0.10222 | 0.88076 |
| 0.37154 | 0.55824 | 0.78824 |
| 0.56823 | 0.60229 | 0.89066 |
| 0.13215 | 0.05719 | 0.78171 |
| 0.06750 | 0.10029 | 0.87697 |
| 0.63089 | 0.55984 | 0.78921 |
| 0.43854 | 0.40087 | 0.87547 |
| 0.87065 | 0.94413 | 0.78639 |
| 0.93354 | 0.90077 | 0.11523 |
| 0.37717 | 0.44338 | 0.22049 |
| 0.93381 | 0.90044 | 0.88110 |
| 0.38410 | 0.44381 | 0.76216 |
| 0.43216 | 0.60003 | 0.11956 |
| 0.87002 | 0.05641 | 0.21661 |
| 0.93629 | 0.09986 | 0.12629 |
| 0.36858 | 0.55658 | 0.21498 |
| 0.87339 | 0.94452 | 0.21673 |
| 0.56612 | 0.39930 | 0.10842 |
| 0.13144 | 0.94289 | 0.21148 |
| 0.06778 | 0.89983 | 0.11526 |
| 0.61659 | 0.44107 | 0.23146 |
| 0.19347 | 0.99976 | 0.11100 |
| 0.94123 | 0.00302 | 0.34724 |
| 0.69477 | 0.50004 | 0.18748 |
| 0.44089 | 0.49996 | 0.34848 |
| 0.80725 | 0.99962 | 0.10150 |

|         |         |          |
|---------|---------|----------|
| 0.06373 | 0.00089 | 0.34867  |
| 0.30905 | 0.50075 | 0.10343  |
| 0.56296 | 0.49791 | 0.34864  |
| 0.81019 | 0.00183 | 0.88473  |
| 0.06191 | 0.00332 | 0.65102  |
| 0.30973 | 0.50113 | 0.88491  |
| 0.56223 | 0.50642 | 0.65277  |
| 0.19521 | 0.99961 | 0.89371  |
| 0.93955 | 0.00197 | 0.64932  |
| 0.43968 | 0.50080 | 0.64960  |
| 0.00167 | 0.96146 | 0.17908  |
| 0.49973 | 0.47068 | 0.13125  |
| 0.99939 | 0.02971 | 0.13351  |
| 0.50068 | 0.53901 | 0.18211  |
| 0.00098 | 0.96189 | 0.81836  |
| 0.50528 | 0.47302 | 0.86618  |
| 0.00419 | 0.03018 | 0.86606  |
| 0.50312 | 0.54067 | 0.82115  |
| 0.07479 | 0.97137 | 0.99899  |
| 0.60530 | 0.46339 | 0.00149  |
| 0.90317 | 0.03998 | 0.99368  |
| 0.42939 | 0.52953 | -0.00025 |
| 0.92798 | 0.97170 | 0.99840  |
| 0.40218 | 0.46193 | 0.99337  |
| 0.10043 | 0.03954 | 0.00567  |
| 0.57696 | 0.53077 | 0.00312  |
| 0.56399 | 0.60204 | 0.12361  |
| 0.12018 | 0.05798 | 0.23405  |
| 0.06476 | 0.10110 | 0.12246  |
| 0.63283 | 0.55955 | 0.20955  |
| 0.56547 | 0.40214 | 0.86852  |
| 0.12926 | 0.94405 | 0.77998  |
| 0.06807 | 0.90056 | 0.88068  |
| 0.62206 | 0.44578 | 0.76053  |
| 0.43430 | 0.60145 | 0.88566  |
| 0.88570 | 0.05938 | 0.76485  |
| 0.70248 | 0.49955 | 0.86742  |
| 0.81953 | 0.51541 | 0.89638  |
| 0.75516 | 0.45666 | 0.03218  |
| 0.76631 | 0.47892 | 0.90359  |
| 0.58550 | 0.49955 | 0.16116  |
| 0.00189 | 0.06991 | 0.00035  |
| 0.50287 | 0.43183 | 0.99466  |
| 0.41138 | 0.49998 | 0.15553  |
| 0.41672 | 0.50105 | 0.83756  |
| 0.91530 | 0.00138 | 0.83716  |
| 0.91203 | 0.00037 | 0.15431  |
| 0.50133 | 0.56997 | 0.00221  |
| 0.00114 | 0.93140 | 0.99822  |
| 0.08781 | 0.00050 | 0.16096  |
| 0.09115 | 0.00048 | 0.84353  |
| 0.59432 | 0.50208 | 0.84507  |
